# Supplementary material
Source: publisher site journal article supplement (https://www.dovepress.com/get_supplementary_file.php?f=445341.xlsx)
Supplement: Supplementary file 1 [file get_supplementary_file.php]

## Sheet: Table S1
Supplementary Table S1: All the differential genes from DKD urine bulking RNA-seq and GSE131882
DKD_urine_up	DKD_urine_down	DKD_kid_scRNA_degs
PCSK7	S100A9	XIST
SLC35E3	S100A8	MT-RNR2
MYO15A	B2M	MT-CYB
ABCC3	LCN2	TMEM101
NWD1	SPRR3	PLCG2
LINC01588	SAT1	CCDC68
EPB41	KRT13	ATP6V1C2
CELF5	DUOX2	DOCK8
ATM	GLUL	S100A13
KCP	ACTG1	UMOD
CACNA1A	MUC21	GABPB1-AS1
RABEP2	ECM1	AC243571.2
ALDH7A1	S100P	KCNC3
FAM230C	FTH1	ADAMTSL1
LOC284930	LGALS3	ARHGAP6
KCNQ1OT1	CRCT1	SYNE2
LINC00673	SPRR1B	B4GALNT2
CYP20A1	KRT19	BHLHE40
ALDH2	MTATP6P1	MAPKAP1
PDE11A	MXD1	BMPR1B
FAM126A	IDI1	MT-CO1
MAP3K20	EMP1	MTCO1P12
ABCB9	MAL	TTC39B
ABI2	ERO1A	PLEKHA5
PTRH1	ZFP36	ZBTB16
CDK13	DUOXA2	CIT
ZDHHC14	TPT1	MUC20-OT1
VIM	HPGD	LINC02694
NLRP1	MUC1	PPARG
ZNF397	RNASE7	THUMPD3-AS1
IFT22	GABRP	ATF3
DNAH14	ELF3	ADM
DISP2	PHLDA1	RHOA
TTLL3	TMPRSS2	SERPINB1
OPA3	NDRG2	TNS2
RNF41	NIBAN2	GATAD1
PIGN	ANXA1	MT-ND1
WDR12	H1-2	MT-ND6
HERC2	TACSTD2	DNAH11
PGBD5	ISG15	YBX3
TCOF1	CSTA	HMBOX1
ABL2	TMPRSS11E	DDX17
UBA6-AS1	PRSS22	AC103563.2
LOC101928035	SPRR2D	CLDN4
RPS6KA5	SPRR2A	CYB5A
POU2F2	JUNB	CTNNAL1
LINC01206	CDKN1A	GPSM2
ZNF271P	H3-3B	XIST
RYR1	PSCA	MT2A
TTL	CYP2B7P	MT1E
SNAP47	SQSTM1	MT1H
DHRS4-AS1	TXN	ZBTB16
LINC00476	CRISP3	MT1G
MLH1	PRSS8	MT1X
LINC02681	TMPRSS11D	CRYAB
MMS22L	IFI27	TSC22D3
SLC1A2	TMBIM1	FTCD
GREM1	SCEL	SGK1
FAM227A	DUSP4	KCNJ16
C20orf194	EPS8L1	PDZK1IP1
BCAM	PPDPF	FKBP5
SLC16A10	SPINK5	ERRFI1
SCO1	SPNS2	NUAK2
CHST12	B4GALT1	TBC1D8B
RPL7L1	PPP1R15A	GADD45B
LOC101927745	LYPD2	ACSM2B
COL1A1	TP53INP2	RHOB
SRGAP3	TMPRSS11B	MEG3
TMEM192	UBC	SLC5A12
LOC101927837	KRT78	AC105052.4
SLC16A1-AS1	KRT17	USP2
DNAH3	TTC22	ACTB
TGFBR3	MAP1LC3B	UMOD
WDR59	ARHGDIB	RASA4B
BIRC6	DUSP5	MT1F
LOC339192	TMSB10	ZFP36
ELP6	IL1RN	PER1
MIR646HG	MUC4	NFKBIA
TYRO3	ACTB	SLC47A2
SYNE1	CNFN	FSTL3
PRDM15	TIMP2	SLC36A2
LINC00689	RND3	ACSM2A
ZNF790-AS1	HMGA1	NFE2L1
USP8	F3	ALDH1L1
ZNF699	C15orf48	FTH1
LINC01304	FCGBP	P3H2
LINC01550	KRT15	RAB11FIP3
DEPDC5	GPRC5A	EDN1
TNFAIP8	FBXO32	BICDL1
TRRAP	PCBP1	RPL39P5
RNH1	HSP90AA1	CDH16
LMOD3	TTC9	AHNAK
NRDE2	WFDC2	RASA4CP
MED17	PLXNB2	RASSF4
PCNX2	HLA-E	NRG1
CPAMD8	MIDN	GPX3
ARHGEF28	HSPB1	MT-ATP8
DPP6	IER3	GADD45A
TYW5	NFKBIA	PRMT1
SLC4A8	HMOX1	PTH1R
RSKR	OAZ1	PDK4
SPATS2	NCCRP1	FGFR2
IAH1	MUC22	LIFR
FLNB	EPHA2	POLR2J3
ATP7B	MAB21L4	RRAD
DCAF11	CXCL6	KLF9
MGA	EPS8L2	TACC1
LOC100507516	MYL12A	ID3
GPR155	S100A11	BTG2
UNC13A	TNFAIP2	PDE10A
CNTN2	HSPA1B	ID1
XKR4	HLA-B	H2AC19
CD276	ZFAND5	WNK1
CHDH	GABARAPL2	H2AC18
DHX57	PIK3IP1	GDF15
SLC47A2	CLDN7	SLC8A1
ACSL5	RDH10	AQP3
NIBAN3	DHRS9	XIST
CROCCP2	CEACAM6	NR4A1
MYO10	RNF39	TXLNGY
DOCK7	EIF1	MT-CO1
MAN2C1	PRSS27	H2BC21
ZNF320	H2AJ	PWRN1
PLEKHD1	RIOK3	SLC38A1
TTLL5	ADGRF1	SLC45A4
TUT4	H2AC6	H2AC6
SVEP1	GSTP1	PNP
NUDT3	SLC16A3	ARL4D
ATP6V0A2	FLG	H2BC18
NF1	CEACAM5	SLC8A1-AS1
HIF3A	ARPC3	ID2
RPS6KL1	ATP1B1	AC005062.1
PARVA	TPM4	ID4
PRKAG2	BPGM	SH3BP5
CSMD2	ARRDC3	ST6GAL1
TRIM72	CEACAM7	PLEKHA2
TF	NR1D1	IER3
AP4M1	GCNT3	PAPPA
MGRN1	MAFF	FXYD4
MAPT	CRNN	H3-3B
TLCD2	HLA-C	TSC22D1
DNMT1	EIF4G2	CHGB
DFFA	CD46	TOB1
RAD9A	ALOX12	DUSP1
RNASEH1-AS1	LDAF1	FOS
GABPB2	RAB5IF	NFE2L2
GALM	LMO7	SH3RF1
MCAM	S100A7	UTY
PEX26	SLPI	NPAP1
SORBS2	NAMPT	H1-4
C1orf167	LITAF	H2BC5
KLRD1	PGK1	USP9Y
METTL16	TALDO1	JUNB
VWA3B	CXCL8	CLCNKB
KIF19	GADD45B	ZFP36L1
GLG1	RMND5A	ACTG1
CRISPLD2	CD59	FP671120.8
NEB	WASL	NR4A2
AATK	NTHL1	TMEM178A
PIF1	CCNG2	SIK1
LOC101930112	RHCG	AQP2
ZC3H8	YPEL5	HSD11B2
CBR3-AS1	PELI1	RAPH1
LOC100506207	METRNL	KSR2
SRSF8	PARD6B	MST1P2
CYP46A1	ZFP36L1	MUC20-OT1
CACNB4	NEAT1	BHLHE40
ZBTB8A	SERPINB1	H1-0
RAB3IP	STK24	ATF3
SOX6	PER1	ZC3HAV1
LINC01524	RAB7A	GALNT11
LOC101927060	ADM	MACC1
NUBPL	FOSL2	GPRIN3
EIF3J-DT	PPP1CB	AC019080.3
ADAMTS8	SLCO4A1	PTMA
LINC00924	MARCKS	ITGB8
PNPT1	TMEM50A	PRMT1
KSR1	MCL1	ADAMTSL3
RAMP2-AS1	MYL6	JUND
SMARCC2	FUT3	AC105052.4
ARHGAP44	SDCBP2	WWTR1
ITPR1	FRMD8	ESYT2
DEPDC4	FAM214A	PDE7B
COL27A1	ATF3	IVNS1ABP
METTL8	TSC22D4	KDM5D
GVQW3	PIM3	MST1L
LINC00662	CDKN2B	HES1
NFIA	HSPB8	CD24
LOC100507384	SGTA	SAT1
C15orf40	ABHD5	AC019080.4
TFR2	GNA15	SULT1C2
PLA2R1	CITED2	DDX3Y
ETFBKMT	PTPN3	PER1
GJA8	DHRS3	PGAP1
ABCG8	B3GALT5	PRR26
ORAI2	DTX2	LINC02532
ZNF285	GDF15	PLCL2
NAV1	IER5	TMEM52B
SLC28A2	SNX18	SEPTIN2
ARMC9	UBB	MT-CO2
FOXP1	TMEM59	DCUN1D1
LINC00710	DUSP1	TTN
SLC25A51P4	VSIG2	ATP1B3
CHKB-DT	S100A10	AC145124.1
NPRL2	CD99L2	NASP
SYNPO2	SNX9	CCNT2
LINC01504	EIF4EBP2	UGT3A1
KCNN3	IFI6	COL4A1
HES2	ATP6V0E1	POLR2J3
SYNJ2	CHAC1	CPAMD8
RICTOR	MYO6	ACTB
STAR	TRIP10	ZFYVE16
KPNA6	CDKN2A	SLC25A29
MCOLN1	RHOA	USP36
FAM189B	AIF1L	ADAM9
NDUFS8	PGD	RANBP2
RILPL1	TXNIP	STAM
AICDA	ANXA11	UACA
SEPTIN4	HES1	AFF1
MFSD14C	PPL	MECOM
DNASE1	TMPRSS4	PCGF5
ITIH5	SMC4	MT-RNR2
C12orf45	DAZAP2	PTP4A1
KIAA0930	DDIT4	SRGAP3
EVI5L	ABLIM1	KLF6
SFXN5	IER2	KCNJ15
GNB5	GRPEL2	LRRFIP1
IL27RA	VASN	AC019197.1
MFSD4B	PRDM1	MYO1E
CATSPER2P1	SORT1	POU5F1
SLC2A6	HBP1	ACSM2A
TTC9C	HES4	PIM3
CCBE1	KLF15	CALB1
UPB1	NT5C2	PLCG2
CD226	CFL1	ZNF208
ATXN2	TSPAN6	ABTB2
LOC102723517	PABPC1	SLC11A2
LOC100287792	WFDC21P	AGAP12P
DOCK6	ADIPOR2	ACSM2B
ANGPT2	GIPC1	TC2N
DIP2A	RAB9A	GNAI1
MED1	KLF5	TCF7L1
RSPH14	TJP3	SCN3A
ABR	CSTB	GATA3
SYMPK	GNB2	PRODH2
ZNF7	PLIN3	PPP1R10
LGALS4	ZG16B	PDK4
MAVS	HLA-A	RAB6A
LOC101928304	CAPZB	AC093583.1
CLN5	HEBP2	MT-ATP6
RBMS3	PICALM	PPP2R1A
TIGAR	NDFIP2	STIM2
MIR99AHG	IER5L	SAMD11
LOC101929420	PITX1	KCNIP4
LOH12CR2	TNIP1	ZNF98
RAD51D	CASP4	C3orf52
MYPN	TOB1	EGR1
DDHD2	ITPKC	RDH10
PWRN3	DKK1	FTCD
LINC02671	PDZK1IP1	REL
HCG11	COX7A2	SIK2
SOX2-OT	RIPK4	MIOX
MMAB	SH2D1B	CLU
ADAMTS4	TLE5	ZNF676
ZNF385C	UBL3	HOXD11
KCNJ14	IL18	AF117829.1
RPAIN	YWHAZ	EIF5B
VWCE	KLK10	ZNF827
MIRLET7BHG	CST6	RNF24
ADCY2	CXCL17	TXNIP
LOC344967	CXCL1	ALAS1
PDP2	SLC6A14	MTUS1
APTX	CHMP2A	ELF5
SEZ6L2	PLAAT4	CDH16
KANK4	DYNLT1	ARHGAP24
DBT	PLSCR1	OR2A20P
LINC00954	LY6E	TFCP2L1
CRTC3	ADIPOR1	RAI14
LOC100505585	NRBP1	AC074386.1
MOGAT3	UBE2B	SCN2A
SMYD4	ATP5F1E	USP34
OGG1	C4orf3	GPCPD1
IPO9	TUBB6	S100A6
MYH7B	SERPING1	ELL2
ARHGEF10	JUND	SLC12A1
NOTCH4	SH3GL1	MT-ND6
ARHGAP8	GNAS	BICC1
HIPK1-AS1	C1orf116	MCCC1
GALNT6	CHMP4B	SDK1
ARSG	STEAP4	TFDP1
ACSS3	CTTN	MTMR10
DNAL1	RRBP1	AC010329.1
TTN	UBE2D3	ZNF331
PRKN	H2BC4	JUN
GBA2	ITM2B	RLF
WAKMAR2	NPTN	COL4A2
UNC13D	TMPRSS11A	AC004593.2
CES2	BHLHE40	SLC7A1
LOC100507283	HSPA1A	NAV2
FAT3	TMCO4	ALOX12P2
POLR1B	IFRD1	CIRBP
LOC153684	RAB1A	MT-ND5
MGC16275	ALDH1A3	KHDC4
AKAP8	LAMB3	TFAP2B
HOMER2	AGFG2	GOT1
ANKRD44	A2ML1	FAM20A
NELFCD	HNRNPC	DOC2B
PTPN7	EHD1	RPLP1
NUGGC	PTTG1IP	ACOT11
PHLDB1	FAM102A	ZFHX3
POLM	RPL36AL	ZSWIM6
OR10H5	PIM1	BAG1
TRIM65	RNF145	NRDC
PCBP1-AS1	ACTR3	U2AF1
DST	RAB1B	TRIM66
KLHL8	SH3GLB2	GATA2
ZFHX4	ATP6V1G1	AP001528.1
TUBGCP2	CHMP1B	DST
GK5	NECTIN4	SEC14L1
ST3GAL3	TMEM127	MT-ND4L
DNAH2	TMSB4X	HOXB7
GFI1B	SDC1	ARHGEF5
DDB1	DSTN	POLR3E
RGR	ATP6V1E1	CLCN3
CCDC30	TAP1	IDS
CCDC157	SERPINB2	SLC44A1
MAP3K3	PDCD6IP	AC022826.2
FSD2	SLK	AC092683.1
ESCO2	TXNRD1	CDKL1
ZNF26	CLTB	SYNE1
GCAT	ELOB	TTN-AS1
PAAF1	TAX1BP1	UBC
LINC02395	RPS27L	PAX8-AS1
NOS1	VDAC2	MIR99AHG
HTR3B	GOLPH3	C9orf72
SLC37A3	EZR	ARPC2
HAND2-AS1	ADIRF	BICD1
ZNF600	YOD1	NUAK2
DPF2	TOP1	OR10AB1P
AVIL	SOD2	CA12
CAPN12	SECISBP2L	PTH1R
NMT2	MMADHC	CDC42BPB
ZNF500	GPCPD1	SCNN1A
SLC22A14	CDC42SE1	GNB5
SETD5	TPD52L2	RPL32P3
SUPT6H	DNAJC5	CDK12
DDI2	NAPRT	CEBPZ
NPFFR1	CDKN1B	SCPEP1
LINC02728	SUSD6	NUTM2A-AS1
FLRT2	CLK1	LINC00472
AACS	ARF4	SRPRA
SLC25A26	YWHAG	MT-ND2
GPATCH2L	TMEM30A	CD9
FLJ40194	B4GALT5	C3orf86
ALDH3B1	FAM107B	GAB1
ACAD10	TMEM229B	CUBN
NEK5	CD55	NOL4L
WDR19	THOP1	MGAT4A
CEP250	HOPX	STAT3
LONP2	RPL41	GPX3
ITGA11	TPI1	PLAC4
TECR	H1-0	AL138752.2
NFAT5	PDP1	TBC1D16
OR3A3	YTHDC1	MTCO1P12
LOC100505774	PCBP2	SCCPDH
CLPB	SARAF	CLCNKA
ZNF714	SMIM5	SQSTM1
RBM6	ZFAND6	CEMIP2
CCDC170	GM2A	SEMA6A
SCRG1	COX6B1	FOSL2
KRT14	ASPRV1	PCSK7
CFAP298	VPS4B	AC068205.2
ZNF583	SELENOK	APOB
ASB15	JUP	OR2A1
DDX10	SH3BGRL2	RB1
ZIM2-AS1	CSNK1E	KCNJ16
UNC45A	ABI1	GRB14
UMODL1	TRIP6	CYB5A
HHAT	KRT16	AMY2B
CCDC88A	FAM89B	FN3K
CLLU1	TMEM40	PRH1
DUSP18	MALAT1	SLK
ENPP1	RAB5C	HSPA1B
FBXL2	GNG12	SLC6A13
CCP110	STS	PSMD6
LOC105369760	YBX3	AHI1
ZNF556	PDLIM5	NUP98
HINFP	FOXQ1	RALBP1
TANGO6	JUN	ZBTB16
PCAT1	GRN	P3H2
ZBTB16	DDX17	XIST
RBM26	LRP10	CLDN16
SNCA	LOC105371730	WNK1
LRIG2	RASSF7	FKBP5
ZNF283	TUBB4B	AASS
PROSER3	BTG2	VAX2
LOC171391	TRAF4	TFCP2L1
SLC25A42	IST1	COL6A1
PIGM	EFHD2	MUC20-OT1
PLEKHS1	HSPH1	PTH1R
CCL5	ABRACL	AHCYL1
BRCA1	CAPN5	NEAT1
LOC105370500	MAPK6	SLC16A12
WIPI1	BLVRB	SEC14L1
LOC101928940	SAMD9	RIMBP2
HNF1A-AS1	SRP14	CSRP1
PDGFRB	RBM47	HSD11B2
SLC4A1	UBALD2	VCL
LRRC74B	PSENEN	NPSR1-AS1
SLC35G3	KRT80	AL137782.1
GTF2H3	TXNDC17	DEFB1
DOCK4	LAPTM4A	P4HA1
REXO5	HECA	MRPS6
CASC4	RAB11A	COL8A1
WDR62	DNAJA4	ATP1B1
GRM1	H2BC5	CKB
OLMALINC	HMGN1	TEX41
KRI1	CDC34	ANK2
ONECUT3	SDCBP	SELENOW
RBFOX1	BCAS1	MYL6
FAM43A	PIP	SCML1
LINC00271	ZFAND2A	ZFP36
ZNF844	SECTM1	IFIT5
PYROXD2	SAP18	NAV2
TMEM213	VMP1	AC138305.1
MAP4	UBE2D1	LPIN1
MKNK1	STAP2	MIR503HG
LOC105374988	DEDD2	LMO7
XPNPEP3	CDC42	UTY
MANSC1	MROH6	C14orf132
LINC01405	F11R	PPP1CB
MSI2	IRF2BP2	SERPINA5
DENND5B	RPL28	MT-ATP6
LINC01198	SEC14L1	MAP1LC3A
LINC00174	ARHGEF10L	TNFRSF12A
CCN5	GPBP1	AL136164.2
CCDC77	ICAM1	SSR3
SULT1A1	CAP1	MERTK
FRMD4B	ACTR2	FP671120.8
LYRM2	NFE2L2	ETNK1
FANCA	KLHL24	DST
ANKS1B	WBP2	KCNJ16
SPHK2	BBLN	MT-CYB
POLR2F	S100A12	TPST2
OR7C1	BRI3	CAPN2
SFTA3	GADD45A	LINC01197
CNOT2-DT	RNF223	MT-ATP8
FGF22	CCDC69	MIR22HG
KIF3B	MKNK2	SDC4
TSR1	RABGAP1L	CCNB1IP1
LINC02071	CTSB	S100A6
SARNP	GID8	PFKP
ZNF429	PWWP2B	DANT2
FBXL18	RASSF5	MOB3B
BASP1-AS1	PPP1R3C	TIPARP
UTP20	UBL5	CGNL1
LOC105373958	BACE2	IFRD1
PKP2	FAU	AC083843.3
FEM1A	SREK1IP1	PROX1
PRPSAP1	MYD88	LINC00472
ZNF75A	SERINC2	OGDHL
ABHD18	IVL	SFRP1
L3MBTL1	DDX3X	MST1L
VWA2	ANKRD13A	LINC01055
NQO2	TNFSF10	SLC22A2
LOC105377590	TSPAN1	GADD45B
PPM1N	ANKRD37	SGK1
ATF6B	SCNN1B	DEPTOR
LINC00908	SELENOW	SGPP2
LOC339803	IFNAR1	SLC25A25
ADGRE2	CAPNS1	CASK
ISG20L2	TRIR	ATP6V0E1
PTPN14	MYZAP	ACP3
RAB3B	ADAM9	RAPGEF3
CPB2-AS1	PPP4C	RDH8
PCNX4	GCOM1	NFE2L2
MAGI2	GCC2	TUFT1
LINC01697	ZFP36L2	AC087045.3
KREMEN1	CNOT1	MGLL
NR2F2-AS1	ARL8B	ELL2
FGD2	OSER1	CLMN
LOC101927151	CYTH1	PIM3
BRSK1	FTL	ACTB
PRR11	GTF2B	FLNA
UEVLD	CYTOR	IGFBP7
LINC01317	ARL4C	FAM110C
KIF5C	WDR1	RBM20
ITGA9-AS1	C6orf132	NOTCH2
CCDC144A	CNN3	EFHD1
NUBP1	NOP10	USP53
LINC01833	NAA50	JADE1
ZNF268	R3HDM4	ATP5MC3
TMEM38A	CXADR	IFIT1
SGCD	TRIM29	FGFR3
C21orf62	VGLL1	DPY19L2
TTC19	GRHL1	RHOBTB3
MOCOS	ATP5MJ	TBRG1
CAD	PPM1A	NHS
FLT3LG	GRB7	ALCAM
IQCG	PROM2	SULT1C2
POLK	CNBP	MYL6B
LDB3	PRRC2C	YWHAZ
TTLL4	UQCR10	BLCAP
NOVA1	CTSH	TMEM120B
P3H4	ANXA2	MTURN
PART1	PKN2	BDKRB2
RRP1	LAMTOR1	PGAP6
PIGX	CIB1	AC129492.3
COQ7	GALNT1	ZFAND5
GGT6	ERV3-1-ZNF117	MT-ND1
OR4D9	PPP4R1	MT-ND5
ZNF713	RPS6	MST1P2
ZFP82	MAP1LC3A	PTGES3
PCDH9	GAPDH	CCNL1
BTN3A2	RNF11	CREB3L2
LOC440700	DNAJA1	ERBB4
TENM3	PTMA	SRSF5
CFL1P1	RBM39	SDHAP1
NUP50-DT	H2AW	GYG2P1
TMEM161B-AS1	ARPC5	IYD
TTC39A-AS1	RIN3	ENDOD1
EDDM13	TUFT1	LGR4
	CALM3	ACTN1
	ZFAS1	FXYD2
	RPS29	EIF1
	RPL34	CLCNKA
	CCNL1	CHP1
	DYNLRB1	RAP1GAP
	SOX4	ACTG1
	CRYAB	SYT10
	ESRRA	LCN12
	PADI1	MYOF
	PRR13	FAM199X
	TMA7	CNN2
	HNRNPF	NFIB
	RPL15	WDR72
	CST3	STK39
	S100A14	CISH
	KLF6	BICDL1
	SLC49A4	ENOX1
	TNFAIP3	SF1
	NDFIP1	ARFGAP3
	H2BC21	AL132780.1
	ARF1	HSPD1
	RPLP0	PLIN5
	ACAD8	TSC22D3
	MGAT1	KCNAB1
	LAMTOR5	ALDH1L1
	EDN2	STAT3
	RERE	TSC22D2
	HMGB2	PAPLN
	TGFA	CPM
	FAM3D	GABARAPL1
	TWF1	MT2A
	POLR2A	TACC2
	ALDOB	TXNIP
	MACO1	INPP4B
	P4HB	LPP
	PNRC1	CHCHD10
	RALA	RP1
	ZNRF1	RASD1
	LEPROT	MT-ND4L
	CDKN1C	PRR26
	PFKP	MST1
	SPINT1	EMD
	PSME1	CCDC18-AS1
	SLC12A6	SIK2
	MT1E	CYSTM1
	ANKRD12	BAIAP2
	SPAG1	MAPK4
	YPEL3	DGKH
	CKB	RADX
	MAP2K3	AKIRIN1
	CTNNA1	AK3
	UBE2L6	UQCC2
	RB1CC1	SCN7A
	CD164	SH3YL1
	IFNGR2	KLHL13
	UBE2H	ACTR3
	MYL12B	WDR1
	LRATD1	DCXR
	ABTB2	SLC12A1
	FOXC1	PITPNB
	KAZN	SVIL
	PPIF	RIMKLB
	CD63	AC131392.1
	PTGES	ARID5B
	CXCL16	MIR222HG
	CNN2	ATP5MC1
	N4BP1	RTL8C
	ARHGAP27	AP000757.2
	CASP7	SCNN1A
	PAX9	MAGI2
	GNB1	CALCR
	MLPH	AP5M1
	SDC4	GPC5
	TOR1AIP2	TP53INP2
	VSIG10L	CA4
	SMS	SYNE2
	BCL10	DUSP15
	CNOT8	GPR132
	HNRNPK	CSNK1A1
	QSOX1	LAMB4
	ARF6	PROSER1
	PNPLA2	CNKSR3
	PSMC6	AC040174.1
	DNAJB1	LONRF1
	B3GNT5	BHLHE40
	AVPI1	AC093525.2
	EIF3H	GOT1
	RAD21	DENND2A
	NR4A1	DENND3
	CCNI	WDFY2
	DDR1	TMEM207
	MYEOV	ABLIM1
	ASPH	PLS3
	DUSP6	CA12
	ARPC1A	FNBP1L
	CARHSP1	UBE2E2
	MT1G	TINAG
	KRT7	ATP6V0D2
	UBA52	FREM1
	C16orf72	CHORDC1
	GUK1	CYCS
	TRIM2	DHX15
	PPP1R15B	KRT7
	UBE2R2	WSB1
	RANBP9	PIP5K1A
	ZNF185	AL390719.2
	KRT23	RPS4Y1
	MTPN	SEC22B
	ASCC2	PLA2G12A
	KRT18	DSCAML1
	CIRBP	LDHB
	MACROH2A1	NRK
	FOS	SEPTIN9
	SRA1	DUSP1
	PTBP3	MTX2
	NCK2	TLE1
	PERP	MRPL27
	SCAND1	LINC02343
	VWA1	GPI
	ABHD3	RAP2C
	SYAP1	SLC16A5
	SERTAD1	ARF4
	CLTA	CBWD1
	CD24	TMEM165
	CCDC186	MIDN
	FAM83D	BCRP3
	RAB18	SHROOM3
	MTCH1	EIF4A2
	DDX5	LINC02532
	NMRK1	MKNK2
	HDAC7	FAM131A
	NDUFB11	PI4KAP1
	EHF	PAX2
	RAB11FIP1	FOXO3
	AP3D1	MAT2A
	DHX32	PCCA-DT
	KLK6	HSPE1
	PARP14	HPCAL4
	KYNU	IP6K2
	KDM5C	BAG5
	RPS16	LINC01278
	RYBP	ATP1A1
	CTSA	ABCA5
	REEP4	LRCH1
	WDR26	SLC19A2
	CLIC3	COX4I1
	CXXC5	RAB11FIP3
	FLII	TMSB10
	TAX1BP3	TRAPPC6B
	TEAD1	DDB1
	AMOTL2	MT-CO1
	LRATD2	ECHDC2
	ITGB8	RBPMS
	SH3GLB1	COX5A
	HNRNPU	TRIB2
	TSG101	LENG8
	BAG3	MAGI2-AS3
	MFSD4A	SLC7A8
	QKI	OCIAD1
	OAS1	RALGPS1
	VCP	EIF3K
	MORF4L1	LINC01606
	SUMO2	PDK4
	RNF169	NBPF19
	SKP1	PTPRG
	WASF2	MRRF
	UBE2M	PRDX6
	GLRX	BCL2
	GPBP1L1	SELENBP1
	NANS	ST7
	SCNN1A	NAIP
	CHP1	NUFIP2
	EDF1	PPIE
	RPS20	RPL10
	LRRFIP1	CCND1
	SCNN1G	CNN3
	LRG1	PER1
	PAPSS2	IER3
	RAP2B	JUNB
	TBL1XR1	EPN1
	ACTN4	UBE2D3
	SON	MAPK1IP1L
	SLC35B3	AC007040.2
	MARCHF5	NOS1
	EPIST	CLEC16A
	EIF4A2	ARMC7
	RESF1	ZNF10
	LYN	TRAF4
	EDEM1	GSTM3
	PPP2CA	SLC6A8
	OSTF1	TMEM52B
	PLEKHF1	MYH9
	TRIB1	HIBADH
	DCAF12	ICA1
	TC2N	RPS18
	ZFAND3	C3orf52
	ERBIN	DNAJC19
	IRAG2	ATP5MG
	MPRIP	SLC4A8
	VPS37B	LPIN3
	RNF103	SLC36A4
	RPL38	ANKRD36B
	CAPN1	PTPN4
	SERTAD2	LINC00958
	HSP90AB1	CMC2
	HNRNPD	LAMA1
	MAT2B	AC006059.2
	CPEB4	SEC23A
	RPL9P8	AC068547.1
	HSBP1	COX7C
	UQCR11	SFPQ
	FCHO2	SERF2
	SPSB3	LRRFIP2
	BEST1	UVRAG
	COX8A	HSPB2-C11orf52
	PLAU	GAD1
	POLB	RPL10A
	BCL6	MYO19
	GSR	FTL
	STAT2	TBC1D4
	STK39	TBC1D1
	MIEN1	SLC25A33
	MMP24OS	NABP1
	CAPZA1	HMGN1
	RPL11	PRR15L
	MORF4L2	SLC9A3-AS1
	SSBP3	SLC35F5
	CEACAM1	AC006486.1
	ISCU	TLE5
	SIRPA	ANXA3
	ABHD17B	GLRX
	CSRNP1	AC004982.2
	JPT1	AP1S2
	SUB1	ANKRD10
	DAD1	IGF2BP2
	TRIM28	MRTFA
	MUC20	NAPA
	RALY	EP400P1
	CTDSP2	MT1E
	COPE	LINC01535
	CLCA4	ATP5F1B
	PFKFB3	FAM118A
	YTHDF3	AC009690.3
	UBAP1	LEPROT
	RHEB	ACSL1
	TMEM54	RNF10
	EIF3A	YBX3
	VAPA	LIMCH1
	ST14	RGN
	BUD31	POLR2J3
	FBRS	STAT5A
	UBE2K	PLEKHB2
	MBP	PLEKHJ1
	PLS3	ATP5F1D
	LNX1	RLIM
	RNF7	NPR3
	GABARAPL1	PRDM16-DT
	RPS19	PCDH1
	PLPP2	DSTN
	LOC112268148	ATP6V0A4
	GBP3	MBOAT2
	TBC1D15	AC073283.3
	OSBPL3	MGME1
	LASP1	YWHAQ
	FAM136A	ABCD3
	RASGEF1B	AC009690.1
	INF2	AIF1L
	FHIP2B	ZNF208
	PPP1CA	KCTD16
	HNRNPA0	WWP2
	CSDE1	AJAP1
	PDXK	SLC25A4
	YWHAE	HOOK2
	AFDN	DIAPH1
	COX4I1	CDC42
	SPECC1	GNG5
	SH3BGRL3	CDK16
	BRD2	HMGCR
	RBPMS	PRR5-ARHGAP8
	RALGDS	MIR29B2CHG
	CAPN2	FGD4
	RPL9	CHCHD3
	KLHDC8B	HSPH1
	C18orf25	SMCO4
	ITGA2	FRY
	B3GNT8	DANCR
	SERPINA1	CECR2
	UBE2G1	RASSF10
	ACADVL	RBM39
	RAB2A	GPX3
	STK40	EGLN3
	HSDL2	IDS
	DDA1	SPP1
	APOBEC3A_B	TNFSF10
	KTN1	PTPN14
	WSB2	DDIT3
	SEC31A	KCP
	HIGD1A	FGFR1OP2
	LSM4	AC105052.4
	SPTSSA	ADCY5
	BLOC1S1	DUSP3
	SLC25A3	DELE1
	UQCRB	SAFB
	SELENOF	CLCNKB
	EEF2	HUS1
	RELA	SLC48A1
	TFF1	TBC1D8B
	RAB5B	ECI2
	PLEC	GGNBP2
	FBP1	VGLL4
	BMP1	PFKFB2
	NAT1	AL929236.1
	RDH13	CYRIB
	HDGF	ITPRID2
	FHL2	HGD
	HNRNPH2	TPD52L2
	RPL36	MED9
	MFSD14B	RIC3
	MYO5B	SRSF6
	NET1	ACP6
	ACHE	USP2
	CAB39	SLC25A27
	VAMP8	MAGI1
	VSIR	PTPN2
	ATMIN	SH3RF1
	MXI1	KLF6
	CTSS	ATP5F1A
	TAPBP	TBC1D16
	HSP90B1	AC083843.4
	MGAT4B	AP1G1
	PSMB8	SAP30BP
	IRF1	PLA2G4F
	PNN	RBM14
	FSTL1	KCNC4
	LYZ	GULP1
	UBA6	SLC20A1
	CLINT1	NDUFA13
	SESN2	KRT8
	BICDL1	SOX4
	FTSJ1	UBE2D2
	SEMA3F	CCT6A
	PSMB1	TMEM30A
	PRDX5	GAPDH
	CAST	CYC1
	MAP3K4	PCK1
	CDC42EP5	ANKRD36C
	NR1D2	SLC25A6
	TST	TIMP3
	MOB1A	PLAU
	BOD1L1	SDHD
	HIPK1	PCDHA1
	PHACTR2	LDLR
	ATP6V1B2	PARP14
	MACC1	CYHR1
	PMAIP1	UBE2A
	SELENOP	AKAP9
	SPINK7	PDE4D
	CRYM	SAR1B
	RPL13A	FKBP2
	SAMD9L	JMJD6
	RNF141	FP236241.2
	C1GALT1	ANKRD9
	SMG7	ACADVL
	RARG	OLA1
	PHLDA3	ARHGAP29
	MAP2K1	ENY2
	IGFBP3	AC058822.1
	ESAM	FN3K
	CALM1	EPOR
	UBE2A	KCNJ1
	PEDS1	NRCAM
	RPS28	SQSTM1
	SF3B1	C6orf62
	ATP2A2	MRPL28
	KHNYN	UTRN
	CCL22	ATP6V1FNB
	CLDN4	NUDT16
	IFITM2	ADAP1
	GTF2A2	HS6ST2
	PAIP2	SLC3A1
	KLF10	GALNT10
	CEBPD	SAMD4A
	RPL18	FLYWCH1
	MAPK8	PPDPF
	UBA1	MIR3936HG
	CNNM4	PRKAG2
	TBC1D2	ZMYND8
	CACUL1	ERICH1
	HSPA6	PHF1
	PNRC2	MRPS21
	TUBA1B	QTRT1
	TDP2	PPP2R1B
	SH3BP2	KIFC3
	LOC105371348	MKLN1-AS
	SERP1	DYNLL1
	RPS3A	GATAD1
	KCTD5	GLDC
	RIT1	PRRG4
	RPL31	DUSP12
	SLC9A3R1	MAP2K6
	ZNF292	RRS1-AS1
	GALNT5	TMX2
	AZIN1	NBDY
	EEF1D	AC099811.2
	KLF3	KIF23
	ASS1	BACE2
	RPS25	STOX2
	XDH	ETS2
	BBC3	FOS
	FUT6	MEF2C
	SRP54	SPINT1
	DBP	MCF2L
	LOC105369209	SYNE1
	ANGPTL4	PRKD1
	GBP2	BHMT2
	CGNL1	NPY1R
	TNFRSF1A	AC018730.1
	NEU1	UMAD1
	ANP32B	HPRT1
	SFN	ZNF676
	TP53INP1	AC003688.2
	TMEM248	ALPK3
	SNX3	GLIS3
	COQ10B	CUTALP
	MTUS1	GDF15
	RPS11	ZNF334
	GATA3	UCHL1
	CRB3	MRPS25
	HLA-F	SENP2
	RAB11B	SLC12A3
	CLDND1	BPTF
	WDR45	PFKFB3
	TSC22D3	SAT1
	FAM32A	TMED10
	NFKBIZ	BDH1
	NDUFB1	KIAA1522
	KRT4	PIGH
	TLE3	CD44
	TM4SF1	PRMT1
	NPEPPS	CLEC2D
	ZDHHC5	RNF212
	KIF5B	PMF1-BGLAP
	ARPC4	LINC01320
	ANKRD11	CLEC18B
	ARRDC1	AC092078.2
	FBXW5	AC027031.2
	ARL6IP1	AC068620.3
	CRYBG2	MGAT5
	FDFT1	WDR18
	MTCO1P12	BCAT2
	DNAJB6	AGAP9
	NUFIP2	EGR1
	CHCHD2	LINC02432
	KLK13	FAM13A
	SMAD3	STON1
	MBOAT2	ANKRD44
	KEAP1	LAMB1
	OPTN	MACROD1
	RPLP1	NDFIP2
	BZW1	PRKCQ
	SLC44A4	C6orf136
	AGR2	MIER1
	THAP9-AS1	ADAMTS9-AS1
	SMIM22	SULT1C4
	XRN1	ZC3H14
	CHD2	BOD1L1
	USP6NL	LINS1
	AQP3	GRB14
	IVNS1ABP	NR4A1
	IL1A	XIST
	MOSPD1	CUTALP
	SRD5A3	ZFP57
	ITPRIPL2	BHLHE40
	ALOX5AP	RCAN1
	C4orf19	CUZD1
	ACADM	KLF6
	IL13RA1	JUN
	NDUFB4	DDIT3
	VAT1	TXLNGY
	BLCAP	RANBP3L
	TNR	SQSTM1
	RPL35A	UTY
	IL2RG	ATF3
	DSP	EGR1
	SRSF5	PDE11A-AS1
	CYTH2	AC019197.1
	CNST	TMEM101
	BAZ1A	GABPB1-AS1
	MPZL3	IGFBP5
	ATP5MC2	MUC20-OT1
	SKIL	ZBTB16
	CYP2A6	IRS1
	C6orf62	SCN3A
	DHCR24	GPT2
	SLC45A4	VAV3
	NECTIN2	PTPN20
	ATRX	GADD45G
	RPL26	MAP2K3
	EMC6	SLC26A7
	RAB5A	SCN2A
	UPF1	AC003688.2
	GAK	PXK
	PI4K2A	P3H2
	BCL9L	ELF3
	LST1	ADGRF1
	RHOB	TRIM73
	CYP4F11	DDX3Y
	ZMAT2	ACTG1
	NELFE	HIF1A
	BICDL2	MCOLN3
	SLC25A23	PART1
	UACA	IL18
	STAU1	CD24
	KLHL21	NEAT1
	GSN	PI4KAP1
	HECTD1	LINC01187
	NPC2	HMGCS1
	MLF2	JADE1
	CDKN2AIP	TNS4
	CANT1	GPSM2
	MEF2D	KCNC3
	XPO1	TTTY14
	MED25	HSPA5
	CNDP2	EGFR
	TMEM41B	FKBP5
	PHF23	KIAA1217
	ARHGDIA	ATP6V0A4
	UBE2L3	SLC25A3
	MKRN1	VPS37B
	RAC1	DST
	HP1BP3	VCL
	FBXO34	HOXB3
	KATNBL1	AC005062.1
	ITPRID2	CACNA1D
	RELL1	SPARCL1
	EWSR1	OTUD6B-AS1
	CSNK1D	ATP6V1C2
	ITPRIP	ITGAV
	HIVEP2	MIDEAS
	PLK3	AL591684.2
	ETS2	GRB14
	UBE2W	RELB
	SH3BP5L	USP9Y
	YY1	TUFT1
	PRKAR1A	CLTC
	SERINC1	FBXO34
	BTG1	SLC25A33
	RER1	FAM24B
	USP38	POLR2J3
	GRIK1-AS2	B2M
	TSKU	COL6A1
	TINAGL1	RASD1
	ADNP	CHCHD2
	LARP4B	CCNI2
	NT5C3A	NUTM2A-AS1
	LMO2	TRIB1
	MDM2	AC093512.2
	SLU7	ARL5B
	AKIRIN2	FBXW11
	MTMR3	GNG12
	RTF2	CIRBP
	SUMO3	NAGS
	AP2M1	HOXA3
	SLC9A3R2	ARPC2
	TJP1	WDR1
	ZBTB7A	TMEM213
	ACAA1	EIF2AK3
	LSR	RSRP1
	CSNK2B	KDM6B
	GPX3	HSD11B2
	SH3TC1	NAIP
	C15orf39	AC138305.1
	KLK7	NAIPP4
	ENPP4	PDE11A
	RALB	AC083843.4
	GPX4	AL158801.1
	SSU72	BCO2
	RASEF	NFAT5
	PRDX1	PIM1
	NDUFA3	NPC1
	ST3GAL4	SYT10
	BROX	STK17A
	PSMB3	SORBS2
	FURIN	ADM
	MEA1	ACTB
	RPL23	LMO7
	BTF3	GNPNAT1
	SNRK	C1orf21
	FAM3B	SLC20A1
	TP53BP2	LRRC37A4P
	ERRFI1	MTFR1L
	TCHP	PNPLA8
	ABHD17C	RLF
	GTPBP2	LITAF
	PHC2	MT1X
	EEF1A1	MPP7
	TRAM1	MIR22HG
	ZNF706	CKB
	UBE2D2	PDE1A
	GALE	NR2F2
	RPS27	CTDSP1
	GNE	DEFB1
	EIF2S2	UBC
	TAB3	FTCD
	MARCHF7	ACSM2B
	TAF10	MT-RNR2
	PATZ1	PRPF4
	RSRP1	GPX3
	ATP5F1B	TIPARP
	ARNTL2	TACC1
	SCP2	XIST
	PPARD	FKBP5
	TRNP1	KCNC3
	SRRM2	CYP3A5
	POLR2K	MTRNR2L12
	TMBIM6	NAPSA
	AIF1	ABLIM1
	HMGB1	ACE
	PARP9	AHNAK
	TMEM106B	MUC20-OT1
	SPINT2	AFM
	PPA1	SLC4A7
	ATG9B	ZBTB16
	SLC15A2	RAB11FIP3
	ATP5MG	FTL
	TMEM165	PRODH2
	CYB5R3	P3H2
	USP53	ALDH1L1
	TRIM16	MT1E
	PSMD7	SELENOW
	NDUFA2	GABPB1-AS1
	IFNGR1	SUCLG1
	SRSF9	NFE2L1
	PDCD10	MT1X
	BRD4	RASA4CP
	PARD3	MT2A
	IRS1	FAAH
	MRPL33	ID2
	DUSP14	UMOD
	MTND1P23	MIOX
		RNF212B
		HSP90AA1
		RASA4B
		MT-RNR1
		NAIP
		WASHC1
		NUDT16
		AL034417.5
		CPM
		CTSH
		CYFIP2
		SAT1
		SLC36A2
		CYP3A4
		PDZK1IP1
		TFPI
		ALDH3A2
		D2HGDH
		SCTR
		ATP1A1
		PI4KAP1
		SDHAP1
		SOCS2
		ADD1
		TLN1
		SLC9A3-AS1
		ERBB2
		ZNF826P
		NABP1
		GADD45A
		YBX3
		TACC2
		MT1G
		IYD
		AP2A2
		CEMIP2
		LUC7L3
		ANKRD18CP
		RASSF7
		IFIT5
		F13A1
		GRAMD1B
		HIPK3
		PSG4
		PSG9
		MT-RNR2
		AC004784.1
		PSG5
		MALAT1
		MT-CO1
		GABPB1-AS1
		MTRNR2L12
		MT-ND4L
		MT-RNR1
		MT-ATP8
		APCDD1L-DT
		UMOD
		PSG3
		FOSL2
		SGK1
		MT-CYB
		MT-ATP6
		MT-CO2
		PWRN1
		HES1
		IER3
		HMGCS2
		MTCO1P12
		MT-ND1
		VMP1
		LDLR
		MT-ND2
		HOXB3
		VPS37B
		ARHGAP24
		MT-ND5
		BICC1
		HSD11B2
		CBLB
		MUC20-OT1
		IGFBP7
		MTMR10
		LINC00645
		RBBP8
		BTG2
		OSBPL3
		MOB1B
		VCL
		KL
		RASD1
		MT-ND6
		SLC9A4
		MSMO1
		DCDC2
		PFKP
		P3H2
		RTN4
		FGFR2
		EYA4
		UPP1
		AL136164.2
		STX7
		CDK6
		NUAK2
		LGR4
		TMEM101
		BLNK
		MTATP8P1
		CYB5A
		MAP2K3
		SELENOW
		YPEL2
		S100A6
		ZNF83
		COA6-AS1
		ZNF608
		ABCB1
		TXNIP
		CUTALP
		GSTM3
		HP1BP3
		DDX17
		ZSWIM6
		PPP1CB
		KCNJ1
		ACTN4
		INSIG1
		PTMA
		NAIP
		APP
		TPM4
		ID2
		TMPRSS2
		DCPS
		OTUD6B-AS1
		ADGRL2
		PDE1A
		SCCPDH
		GATAD1
		ZFP36
		GPC5
		ITGB8
		SLC19A2
		BCAM
		TRIB1
		HMGCS1
		TNFRSF12A
		COL4A5
		COBLL1
		SETDB2
		JAG1
		NPAP1
		LMNA
		MIR22HG
		SLC45A4
		MAL
		FGD3
		NEDD4L
		TMEM184C
		KIZ-AS1
		MAP3K14
		LRCH1
		SLC39A8
		KIZ
		IQUB
		KLF6
		TEAD1
		ARHGEF28
		LAMB4
		TGIF1
		ACSL4
		RNF43
		AC068631.1
		CSRP1
		NR2F2
		CRIM1
		RFX3-AS1
		BCL2
		HMGCR
		FRMD4A
		CREBRF
		BBS2
		CYS1
		CROT
		SCNN1G
		AC010997.4
		ERBB2
		FTL
		H2AC6
		PPIE
		SQLE
		CISH
		KLHL24
		WDR1
		HELB
		WSB1
		ATP1B3
		SLC12A3
		XPO1
		SLC35B4
		AC005746.2
		ADH5
		MITF
		SESTD1
		HACD1
		MIR222HG
		HECTD1
		TFCP2L1
		RNF114
		CTSH
		TMEM59
		HMGN3
		KIFC3
		PKP4
		NR3C2
		TEX41
		SNHG29
		CA12
		MTND2P28
		PROM1
		KANK1
		GLS
		MTURN
		KLHDC2
		EPHA2
		ATG2B
		ITGB6
		KCNJ15
		TFAP2A
		STON2
		ITM2B
		AL157935.2
		PTGER3
		CYFIP2
		LINC01606
		CALB1
		ERMP1
		SH3RF1
		HSPA8
		CPLANE1
		NR2F2-AS1
		GRAMD2B
		PTPN13
		VGLL4
		MSI2
		S100A2
		TSGA10
		ADAMTS16
		SHROOM3
		ARL4C
		GPR132
		IFRD1
		FOSB
		MBNL2
		PGM5
		UBA5
		NHSL1
		SMAD1
		BRD8
		CREG1
		NTN4
		ABTB2
		SIK2
		WWC2
		SLC38A11
		ZCCHC9
		LINC00472
		QTRT1
		AL117339.4
		PLCZ1
		BX470102.1
		TGOLN2
		HMGA1
		RPS26
		CLIP4
		CLDN8
		ELL2
		MAML2
		PAPSS1
		LRRFIP1
		ASAP2
		NSD1
		FAM102A
		SDCCAG8
		CELSR2
		AC124944.2
		FRY
		CCDC90B
		ACTR3
		CAP2
		ABLIM1
		ATP6V1H
		CFAP298-TCP10L
		KDM6B
		KIF3A
		DUSP1
		KNG1
		C9
		MPHOSPH8
		PNPLA2
		SYTL2
		ASAH1
		UGT3A1
		AC090360.1
		CLIP1
		MRPS6
		FHOD3
		DLGAP1-AS2
		PDE5A
		SPATS2
		PGAP1
		AL929236.1
		LONRF2
		WDFY2
		ERRFI1
		HOXA-AS2
		PAG1
		MFHAS1
		DYNC2LI1
		MFN1
		MAFF
		PLXNB2
		RAD17P2
		DACH1
		IMMP2L
		KMT2E-AS1
		GLUL
		MIR99AHG
		CCNG2
		ASCC1
		EPS8L2
		MTSS1
		NBR1
		SDHAP1
		OVCH2
		FAM133B
		PLS3
		SOX13
		ATP8A1
		PIK3CB
		IRAK1BP1
		CDH16
		DTWD1
		NR0B2
		SLF2
		ERC1
		SLC12A1
		RPS27L
		KRT19
		MT-ND3
		ATP8B1
		AC103810.2
		HIF1A
		DDX11
		SPTBN2
		COL4A6
		HNMT
		SLC9C1
		NOTCH2
		FRG1HP
		GLRX
		SIM1
		TMEM51
		AIF1L
		EZR
		CREM
		JUP
		ALAS1
		TCAIM
		LPIN2
		PREPL
		BIVM-ERCC5
		MYO9A
		ACVR1B
		PSMG2
		WDR48
		MAP4K3
		PLCL2
		TMEM38B
		PRKAG2
		RPL12
		RPL11
		MRPS31
		ELP2
		CD151
		AKT3
		PHYH
		GDF15
		SPAG16
		ZC2HC1A
		PFKFB3
		HSPE1
		NR1D1
		SENP3-EIF4A1
		NAV2
		AFF4
		TSPAN5
		LINC01943
		ALDH7A1
		WNK1
		FAM20A
		SKIL
		GATA3
		SOX4
		PIK3C3
		TPM1
		PRR15
		PODXL
		DOCK7
		RPL13
		PAX8
		GLDC
		SLC2A1
		OGFRL1
		MBOAT1
		AC020916.1
		PTH1R
		CAT
		PPFIBP2
		MITD1
		TMEM260
		CHD2
		ZC3H14
		TRMT1L
		MBD4
		WHAMMP2
		NHLRC3
		NNT
		TOP1
		INTS3
		CPSF1
		SGMS2
		NUDT12
		RBM45
		CEP76
		AC017002.3
		ME3
		EDEM3
		ERLIN1
		CLDN4
		GUSBP2
		ICE2
		AF241726.2
		TNFRSF19
		VPS39
		ATP6V0A4
		FGD5-AS1
		SMN1
		NPHP3-ACAD11
		CFAP221
		ARID4A
		RREB1
		AC068580.4
		SYNJ2BP-COX16
		FNDC3B
		TTC13
		DCAF17
		ARHGAP6
		FAM13A
		WEE1
		TANC1
		FOXP1
		SLC38A2
		ZYX
		DDX24
		EML4
		SHOC1
		CTNNAL1
		GRHL2
		AASDH
		RPLP1
		MST1L
		HIBADH
		LRRC37A4P
		CEP290
		PXYLP1
		AC106795.1
		DCAF6
		VAV3
		SYK
		RGS6
		ATP5MC1
		CIRBP
		NUDT5
		RSRP1
		PCM1
		EDEM2
		SGMS1
		EPRS1
		AKAP1
		CEP104
		DANT2
		HELLS
		RIOX2
		LSM8
		SNX5
		CLU
		G3BP1
		FDFT1
		PEX1
		GPR160
		TFB1M
		ADAL
		PABPC1L
		PSAP
		UVRAG
		ZNF91
		LGALS3BP
		SHPRH
		MAP3K21
		ADD3
		ABO
		CLPX
		NUCB2
		MRTFB
		HOMER1
		RAPH1
		SLC44A3
		METTL17
		MYO5C
		MANBA
		SYNE1
		POLR2J3
		KANSL1L
		GPAM
		LYPLAL1
		SLC39A6
		SUMF2
		THUMPD1
		PER1
		CDKN1A
		CD47
		C11orf80
		COX7C
		MGMT
		LINC01612
		HECTD2
		PPFIBP1
		IRF1-AS1
		CCNL1
		JKAMP
		TOX
		SLC20A1
		HSPA1B
		PHF1
		MIR4435-2HG
		TNRC6A
		DENND6A
		VASP
		TRIM27
		FCHO2
		ATL3
		SPTAN1
		SFPQ
		SPATA6
		RPS3
		GCGR
		GULP1
		AKAP11
		LINC01762
		KIAA0319L
		TMEM117
		HOXB7
		ADM
		RBL2
		HACD3
		PLSCR1
		COG8
		HNRNPC
		EPC1
		ME2
		KPNB1
		AL591806.4
		RPS24
		CYTOR
		ATP6V0E1
		CROCCP2
		GPRC5B
		DCAF11
		RALYL
		JUNB
		LTBP3
		SEMA6D
		DHX29
		KSR2
		SPTLC2
		PIGQ
		NAB2
		TSC22D3
		CCN2
		DUSP1
		ERRFI1
		FKBP5
		IFITM3
		H2AC18
		PDE1A
		MDM2
		IFITM2
		GLUL
		ID1
		PKHD1
		FOSB
		CPM
		PDE10A
		TNNT2
		LONRF2
		PDK4
		TACC2
		ZFP36L2
		LAMA3
		MT-ATP8
		F5
		GADD45B
		SLC7A2
		ALDH1A2
		SORT1
		CFH
		ERGIC1
		NEDD9
		MT-ND5
		ZBTB16
		TUB
		MAGI2
		PAWR
		MT-CYB
		TGFBR3
		RERG
		AL031666.2
		MAGI2-AS3
		MFSD2A
		H2AC19
		AC020916.1
		IRAK3
		VWA3A
		MACC1
		WT1
		AC025431.1
		LINC01320
		LINC01558
		PAX8-AS1
		MPP3
		ARHGAP10
		H1-3
		MT-ND4L
		H2AC6
		HNF1A-AS1
		LINC02532
		XIST
		RHOB
		IGFBP4
		LRRK2
		BICC1
		NSMF
		GPX3
		HRCT1
		ABCG1
		SLC4A11
		IGFBP7
		PTGDS
		KIRREL3
		BICD1
		KCNJ16
		SLC39A14
		WT1-AS
		AFDN
		MAF
		H2BC8
		EPB41L5
		DPY19L3
		SPIDR
		RPL10
		RBFOX1
		CUTALP
		FTL
		NEAT1
		MT-ATP6
		HSPB8
		RAPGEF3
		ACADL
		CREB5
		TACC1
		LONRF1
		CRNDE
		PLA2R1
		DNAH11
		CCDC200
		HNRNPLL
		SATB2
		HMGCS1
		EGOT
		MAP1LC3A
		MT1E
		MT-CO1
		MT2A
		PAG1
		PIEZO1
		ID4
		COL4A5
		MROH1
		TNC
		BCL6
		MSMO1
		CLDN4
		PRKCI
		PCA3
		FOXP2
		LGALS8
		H1-0
		ELMO1
		LINC01197
		SEL1L3
		AC018730.1
		H2BC21
		FGFR3
		FTH1
		CALB1
		RBPMS
		CEBPD
		LBH
		CACNA1H
		ZNF846
		AQP9
		SULT1C2
		RIC8B
		RIPOR1
		SLC25A16
		MT-ND1
		IGFBP2
		EIF1
		MVD
		OR2A42
		THRB
		LHFPL3-AS2
		DCDC2
		MTCO1P12
		CPEB4
		PROM1
		FN3K
		FP671120.8
		CHL1
		CLIP4
		H1-4
		ATP2B1
		PLCE1
		ABCA13
		EIF3M
		CRYAB
		ID3
		H1-2
		SLC7A6
		OTUD6B-AS1
		XIST
		SLC2A3
		TIPARP
		C7
		CUTALP
		NR4A1
		NR4A2
		GPC5
		GABPB1-AS1
		AL157815.1
		AC096741.1
		NEAT1
		TRPM7
		NAIP
		RP1
		TTN
		RBKS
		MUC20-OT1
		FOSL2
		EGR1
		MT-ATP8
		BHLHE40
		LINC00645
		MT-CYB
		MT1E
		KLF6
		ERBB4
		PDE10A
		SH3RF1
		RIMBP2
		LINC02532
		GDF15
		AL136164.2
		MTFR1L
		LRRK2
		FP671120.8
		FOS
		DVL3
		COA6-AS1
		DDX17
		SEC14L1
		TNFSF10
		SRRM4
		TMEM101
		OSBPL3
		RDH10
		TGFBR1
		HOXB3
		AC068631.1
		KNG1
		TMEM38B
		OTUD6B-AS1
		EGOT
		PIK3C2G
		MT-ND1
		TRMT9B
		ZNF385D
		PI4KAP1
		WNK1
		POLR2J3
		DEFB1
		PIK3C2A
		NABP1
		SMIM5
		LRRC37A4P
		CLCNKB
		GSTM3
		TMTC1
		DUSP1
		CTDSPL
		ITPR1
		ATF3
		AC105052.4
		SYNE2
		SNX29
		CALCR
		PLEKHD1
		SDHAP1
		AP000873.2
		PAWR
		MT-ND4L
		NAIPP4
		CCDC18-AS1
		CNOT6L
[truncated: 83 more rows]

## Sheet: Table S2
Supplementary Table S2:The difference information of all genes from urine bulk-RNAseq of DKD
gene name	logFC	pvalue	FDR
S100A9	-6.93173	6.06704e-62	2.10101e-58
S100A8	-7.39277	7.11744e-52	1.23239e-48
B2M	-5.78105	2.02051e-50	2.33234e-47
LCN2	-8.16846	6.52909e-49	5.65256e-46
SPRR3	-6.64471	7.841e-44	5.43068e-41
SAT1	-6.5122	6.57232e-43	3.79333e-40
KRT13	-6.30061	1.24142e-37	6.1415e-35
DUOX2	-6.78374	6.8785e-37	2.97753e-34
GLUL	-6.56239	2.13615e-34	8.21943e-32
ACTG1	-5.50419	7.94939e-34	2.75287e-31
MUC21	-7.17715	1.02839e-32	3.23757e-30
ECM1	-6.60978	8.45264e-32	2.43929e-29
S100P	-6.79855	8.54284e-31	2.27568e-28
FTH1	-4.69208	1.21887e-30	3.01497e-28
LGALS3	-6.85269	2.27819e-30	5.25957e-28
CRCT1	-5.8571	9.21684e-30	1.99487e-27
SPRR1B	-5.85103	1.99401e-28	3.83625e-26
KRT19	-6.05453	1.93011e-28	3.83625e-26
MTATP6P1	-7.0768	6.57674e-28	1.1987e-25
MXD1	-6.90285	4.8973e-27	8.47968e-25
IDI1	-6.58943	5.34231e-27	8.80972e-25
EMP1	-6.59813	1.30407e-26	2.05272e-24
MAL	-7.1926	1.85264e-26	2.67321e-24
ERO1A	-5.66842	1.82772e-26	2.67321e-24
ZFP36	-5.84022	5.09106e-26	7.05213e-24
DUOXA2	-6.83944	1.10674e-24	1.47409e-22
TPT1	-4.55638	1.44531e-24	1.85375e-22
HPGD	-6.57489	1.83923e-24	2.27473e-22
MUC1	-6.54162	3.02457e-24	3.61176e-22
RNASE7	-6.68044	5.96048e-24	6.88038e-22
GABRP	-6.30747	7.03219e-24	7.69034e-22
ELF3	-5.2209	7.10629e-24	7.69034e-22
PHLDA1	-6.26153	8.99382e-24	9.43806e-22
TMPRSS2	-6.30038	1.06296e-23	1.08265e-21
NDRG2	-5.94145	1.23582e-23	1.22275e-21
NIBAN2	-6.47354	3.13211e-23	3.01291e-21
ANXA1	-4.72971	3.81933e-23	3.57468e-21
H1-2	-6.43969	4.47053e-23	4.07407e-21
TACSTD2	-6.28589	4.70121e-23	4.17443e-21
ISG15	-5.97155	3.20462e-22	2.7744e-20
CSTA	-6.68706	4.60615e-22	3.89051e-20
TMPRSS11E	-6.19844	7.9647e-22	6.56708e-20
PRSS22	-5.98638	8.39602e-22	6.76172e-20
SPRR2D	-6.18219	1.74897e-21	1.34618e-19
SPRR2A	-5.96774	1.7493e-21	1.34618e-19
JUNB	-5.62369	2.21892e-21	1.67046e-19
CDKN1A	-6.42797	3.07973e-21	2.26917e-19
H3-3B	-5.42391	3.15368e-21	2.27525e-19
PSCA	-5.66417	3.3302e-21	2.35357e-19
CYP2B7P	-6.52271	7.57911e-21	5.24929e-19
SQSTM1	-5.32392	7.77429e-21	5.27889e-19
TXN	-6.04504	2.4831e-20	1.65365e-18
CRISP3	-5.73168	2.81946e-20	1.84222e-18
PRSS8	-5.75826	4.00752e-20	2.57001e-18
TMPRSS11D	-6.30631	4.12548e-20	2.59755e-18
IFI27	-6.16301	7.50586e-20	4.64157e-18
TMBIM1	-5.2251	9.42869e-20	5.72834e-18
SCEL	-4.88333	1.31021e-19	7.82283e-18
DUSP4	-5.94126	1.39721e-19	8.09713e-18
EPS8L1	-5.83808	1.40291e-19	8.09713e-18
PPDPF	-6.08609	2.80731e-19	1.59373e-17
SPINK5	-5.85965	3.50447e-19	1.95741e-17
SPNS2	-5.58733	3.87876e-19	2.13209e-17
B4GALT1	-5.69674	5.95266e-19	3.22095e-17
PPP1R15A	-5.72021	1.00282e-18	5.34272e-17
LYPD2	-5.12943	1.52498e-18	8.00152e-17
TP53INP2	-5.70863	2.8724e-18	1.48465e-16
TMPRSS11B	-5.58803	5.94138e-18	3.02573e-16
UBC	-4.48893	8.6622e-18	4.34742e-16
KRT78	-5.10155	9.28444e-18	4.59315e-16
KRT17	-5.65256	1.71852e-17	8.38201e-16
TTC22	-5.82796	2.02739e-17	9.61761e-16
MAP1LC3B	-5.72466	2.01478e-17	9.61761e-16
ARHGDIB	-5.89619	3.58287e-17	1.67669e-15
DUSP5	-5.09487	4.51676e-17	2.08554e-15
TMSB10	-4.05884	5.79578e-17	2.64089e-15
IL1RN	-4.42148	1.02482e-16	4.60903e-15
MUC4	-5.14561	1.08408e-16	4.81303e-15
ACTB	-4.2284	1.28831e-16	5.64738e-15
CNFN	-4.72813	1.53202e-16	6.63173e-15
TIMP2	-5.26313	1.75364e-16	7.49737e-15
RND3	-5.28662	2.59258e-16	1.09489e-14
HMGA1	-5.52166	3.02849e-16	1.26357e-14
F3	-5.58799	3.41617e-16	1.40836e-14
C15orf48	-5.05487	3.69304e-16	1.50459e-14
FCGBP	-5.08543	8.37475e-16	3.3723e-14
KRT15	-5.84626	9.10822e-16	3.62549e-14
GPRC5A	-5.1665	9.38315e-16	3.65784e-14
FBXO32	-4.97984	9.40073e-16	3.65784e-14
PCBP1	-4.69334	1.32795e-15	5.10967e-14
HSP90AA1	-4.63764	1.40113e-15	5.33199e-14
TTC9	-5.01921	1.85197e-15	6.97105e-14
WFDC2	-5.1725	2.255e-15	8.39685e-14
PLXNB2	-5.53364	2.6864e-15	9.89682e-14
HLA-E	-4.7766	2.79473e-15	1.01875e-13
MIDN	-4.95215	3.47504e-15	1.25355e-13
HSPB1	-4.19969	4.35318e-15	1.53827e-13
IER3	-4.97637	4.351e-15	1.53827e-13
NFKBIA	-5.12054	8.58322e-15	3.00239e-13
HMOX1	-4.72007	1.05737e-14	3.66166e-13
OAZ1	-4.98209	1.07559e-14	3.68788e-13
NCCRP1	-5.38184	1.61832e-14	5.49437e-13
MUC22	-5.34488	1.89827e-14	6.38224e-13
EPHA2	-5.37548	1.95548e-14	6.51136e-13
MAB21L4	-5.29077	2.09678e-14	6.91539e-13
CXCL6	-5.6328	2.13748e-14	6.91784e-13
EPS8L2	-5.25508	2.12028e-14	6.91784e-13
MYL12A	-5.23152	2.34085e-14	7.35834e-13
S100A11	-3.97191	2.35858e-14	7.35834e-13
TNFAIP2	-5.43034	2.35012e-14	7.35834e-13
HSPA1B	-4.60931	2.31655e-14	7.35834e-13
HLA-B	-3.82812	4.99864e-14	1.54556e-12
ZFAND5	-4.36984	5.22713e-14	1.60191e-12
GABARAPL2	-5.10703	5.54057e-14	1.68307e-12
PIK3IP1	-5.33314	6.13573e-14	1.84766e-12
CLDN7	-5.39967	6.29938e-14	1.88058e-12
RDH10	-5.3346	8.33522e-14	2.46708e-12
DHRS9	-5.49532	1.00327e-13	2.94435e-12
CEACAM6	-5.12582	1.13137e-13	3.29238e-12
RNF39	-5.49731	1.37052e-13	3.95509e-12
EIF1	-4.19465	1.38407e-13	3.96117e-12
PRSS27	-4.55831	2.00263e-13	5.68451e-12
H2AJ	-4.70202	2.37923e-13	6.69859e-12
RIOK3	-4.07147	2.73697e-13	7.64366e-12
ADGRF1	-4.81012	3.36892e-13	9.33325e-12
H2AC6	-5.24159	3.98588e-13	1.09549e-11
GSTP1	-4.93471	5.31462e-13	1.44918e-11
SLC16A3	-5.2834	5.36033e-13	1.45022e-11
FLG	-4.69419	6.13989e-13	1.64825e-11
CEACAM5	-4.65815	6.61311e-13	1.76163e-11
ARPC3	-4.64448	7.55904e-13	1.99824e-11
ATP1B1	-4.87936	8.22699e-13	2.15834e-11
TPM4	-4.33233	9.02335e-13	2.34946e-11
BPGM	-5.35471	1.10434e-12	2.85397e-11
ARRDC3	-4.82025	1.14354e-12	2.93339e-11
CEACAM7	-5.37835	1.17859e-12	3.00107e-11
NR1D1	-5.03925	1.45072e-12	3.66703e-11
GCNT3	-4.95222	1.60985e-12	4.03979e-11
MAFF	-4.77021	1.65084e-12	4.11284e-11
CRNN	-5.27953	1.9543e-12	4.8341e-11
HLA-C	-4.59707	1.98977e-12	4.88692e-11
EIF4G2	-4.26876	2.06246e-12	5.02978e-11
CD46	-4.68879	2.09489e-12	5.07316e-11
ALOX12	-4.77413	2.63825e-12	6.34463e-11
LDAF1	-5.39362	2.77809e-12	6.63484e-11
RAB5IF	-4.97365	4.04308e-12	9.52461e-11
LMO7	-4.43796	4.04018e-12	9.52461e-11
S100A7	-4.92291	4.57604e-12	1.07073e-10
SLPI	-5.00525	4.68029e-12	1.08777e-10
NAMPT	-4.795	4.86018e-12	1.12205e-10
LITAF	-4.32691	5.51839e-12	1.26558e-10
PGK1	-4.38593	6.98814e-12	1.5921e-10
TALDO1	-4.73713	7.37974e-12	1.67033e-10
CXCL8	-3.98436	9.76368e-12	2.19556e-10
GADD45B	-4.83974	1.17649e-11	2.6285e-10
RMND5A	-4.75601	1.20085e-11	2.66573e-10
CD59	-4.38958	1.98825e-11	4.3748e-10
WASL	-4.51743	1.99601e-11	4.3748e-10
NTHL1	-4.78705	2.49938e-11	5.44362e-10
CCNG2	-4.59325	3.10646e-11	6.72354e-10
RHCG	-4.9836	3.50932e-11	7.54831e-10
YPEL5	-4.47733	4.16263e-11	8.89827e-10
PELI1	-4.52488	4.54304e-11	9.65187e-10
METRNL	-5.10577	4.75523e-11	1.00411e-09
PARD6B	-4.45673	4.9505e-11	1.039e-09
ZFP36L1	-4.06356	6.51621e-11	1.35938e-09
NEAT1	-3.44488	6.55963e-11	1.36024e-09
SERPINB1	-4.833	7.17581e-11	1.47916e-09
STK24	-4.73394	7.73206e-11	1.57507e-09
PER1	-4.72335	7.726e-11	1.57507e-09
RAB7A	-4.46294	8.07054e-11	1.6344e-09
ADM	-4.87306	8.80889e-11	1.77356e-09
FOSL2	-4.56288	1.01203e-10	2.02581e-09
PPP1CB	-4.30957	1.25363e-10	2.49501e-09
SLCO4A1	-4.89711	1.29116e-10	2.5405e-09
MARCKS	-4.20939	1.28898e-10	2.5405e-09
TMEM50A	-4.93664	1.32861e-10	2.59942e-09
MCL1	-4.34059	1.45366e-10	2.82811e-09
MYL6	-3.37169	1.48297e-10	2.869e-09
FUT3	-4.23373	1.53664e-10	2.95633e-09
SDCBP2	-4.40563	1.6267e-10	3.1123e-09
FRMD8	-4.89847	1.71136e-10	3.25629e-09
FAM214A	-4.6372	1.86828e-10	3.53544e-09
ATF3	-4.39016	2.86064e-10	5.38391e-09
TSC22D4	-5.00899	2.88672e-10	5.40363e-09
PIM3	-4.56629	4.46544e-10	8.31387e-09
CDKN2B	-4.87699	4.98353e-10	9.22885e-09
HSPB8	-4.73626	5.33956e-10	9.83558e-09
SGTA	-4.88768	5.86443e-10	1.07452e-08
ABHD5	-4.53613	6.37046e-10	1.1611e-08
GNA15	-4.68467	6.74206e-10	1.2224e-08
CITED2	-4.56787	6.82273e-10	1.23058e-08
PTPN3	-4.62726	7.03548e-10	1.26238e-08
DHRS3	-4.2797	9.14827e-10	1.63301e-08
B3GALT5	-4.46005	1.05696e-09	1.87705e-08
DTX2	-4.77403	1.07481e-09	1.89901e-08
GDF15	-3.9309	1.23569e-09	2.17219e-08
IER5	-4.24431	1.32651e-09	2.32005e-08
SNX18	-4.27455	1.44745e-09	2.51885e-08
UBB	-3.94151	1.635e-09	2.831e-08
TMEM59	-3.91474	1.82764e-09	3.14881e-08
DUSP1	-4.34367	2.39807e-09	4.11114e-08
VSIG2	-4.69039	2.63334e-09	4.48857e-08
S100A10	-3.70768	2.64415e-09	4.48857e-08
CD99L2	-3.77737	2.66398e-09	4.50018e-08
SNX9	-4.2825	2.70767e-09	4.55177e-08
EIF4EBP2	-4.57452	2.74502e-09	4.59228e-08
IFI6	-4.32192	2.79443e-09	4.65245e-08
ATP6V0E1	-4.65487	2.9641e-09	4.91133e-08
CHAC1	-4.53844	3.19118e-09	5.26241e-08
MYO6	-4.67987	3.51901e-09	5.77551e-08
TRIP10	-4.34045	3.69217e-09	6.03113e-08
CDKN2A	-4.26311	3.74904e-09	6.09527e-08
RHOA	-3.71663	3.97753e-09	6.43654e-08
AIF1L	-4.442	4.11725e-09	6.63164e-08
PGD	-3.99564	4.82103e-09	7.72927e-08
TXNIP	-3.58447	5.72431e-09	9.13516e-08
ANXA11	-3.40414	6.12804e-09	9.73458e-08
HES1	-4.41291	6.84577e-09	1.08251e-07
PPL	-3.18608	6.96685e-09	1.09665e-07
TMPRSS4	-3.77663	8.87813e-09	1.39118e-07
SMC4	-4.05624	8.92065e-09	1.39154e-07
DAZAP2	-3.69244	1.06024e-08	1.64646e-07
DDIT4	-4.23723	1.13447e-08	1.75387e-07
ABLIM1	-4.30603	1.37397e-08	2.11469e-07
IER2	-4.55308	1.45418e-08	2.22825e-07
GRPEL2	-4.46387	1.53773e-08	2.34588e-07
VASN	-4.07646	1.61894e-08	2.45894e-07
PRDM1	-3.72494	1.63797e-08	2.47698e-07
SORT1	-4.42933	1.74309e-08	2.62449e-07
HBP1	-4.09019	2.05667e-08	3.08322e-07
HES4	-4.35375	2.09694e-08	3.13004e-07
KLF15	-4.34904	2.15486e-08	3.2027e-07
NT5C2	-3.8328	2.18515e-08	3.23384e-07
CFL1	-3.7317	2.31241e-08	3.40761e-07
TSPAN6	-3.88812	2.45441e-08	3.58634e-07
PABPC1	-3.50939	2.44564e-08	3.58634e-07
WFDC21P	-4.22027	2.50382e-08	3.64316e-07
ADIPOR2	-4.38533	2.94704e-08	4.27012e-07
GIPC1	-4.27625	3.22448e-08	4.65265e-07
RAB9A	-4.61867	3.28282e-08	4.71718e-07
KLF5	-4.07151	3.61731e-08	5.17634e-07
TJP3	-4.23615	4.23521e-08	6.03561e-07
CSTB	-3.3456	4.27326e-08	6.06488e-07
GNB2	-3.98461	4.4269e-08	6.25729e-07
PLIN3	-3.31758	4.8758e-08	6.86377e-07
ZG16B	-4.87904	5.32878e-08	7.47108e-07
HLA-A	-3.61127	5.39789e-08	7.53745e-07
CAPZB	-4.01959	5.63789e-08	7.84097e-07
HEBP2	-3.92502	5.71964e-08	7.92285e-07
PICALM	-3.57153	5.88846e-08	8.1242e-07
NDFIP2	-4.2918	6.29602e-08	8.61784e-07
IER5L	-4.45123	6.29118e-08	8.61784e-07
PITX1	-3.26911	7.03154e-08	9.58671e-07
TNIP1	-3.63027	7.35776e-08	9.99212e-07
CASP4	-4.54622	7.96508e-08	1.07746e-06
TOB1	-4.00041	8.95724e-08	1.20696e-06
ITPKC	-3.51878	9.43772e-08	1.26678e-06
DKK1	-4.50507	9.75262e-08	1.30399e-06
PDZK1IP1	-3.73489	9.93211e-08	1.32288e-06
COX7A2	-3.87632	1.02927e-07	1.36566e-06
RIPK4	-4.34818	1.05018e-07	1.38809e-06
SH2D1B	-4.61275	1.11433e-07	1.46727e-06
TLE5	-3.51656	1.12282e-07	1.47286e-06
UBL3	-4.25443	1.18296e-07	1.54588e-06
IL18	-3.87969	1.2192e-07	1.58726e-06
YWHAZ	-3.28339	1.22416e-07	1.58774e-06
KLK10	-4.16574	1.35609e-07	1.75229e-06
CST6	-4.45284	1.41936e-07	1.82723e-06
CXCL17	-3.89999	1.45012e-07	1.85992e-06
CXCL1	-3.97961	1.51593e-07	1.93714e-06
SLC6A14	-3.94121	1.66336e-07	2.11773e-06
CHMP2A	-4.06256	1.7153e-07	2.17586e-06
PLAAT4	-4.22753	1.72374e-07	2.17858e-06
DYNLT1	-4.11249	1.78841e-07	2.25209e-06
PLSCR1	-4.3571	1.8307e-07	2.297e-06
LY6E	-3.83277	1.8631e-07	2.32921e-06
ADIPOR1	-4.09056	1.963e-07	2.44528e-06
NRBP1	-4.25655	2.09819e-07	2.59501e-06
UBE2B	-3.74921	2.09171e-07	2.59501e-06
ATP5F1E	-3.28624	2.21988e-07	2.73575e-06
C4orf3	-4.15455	2.32033e-07	2.8494e-06
PCSK7	4.6126	2.84633e-07	3.48298e-06
TUBB6	-3.7741	3.1227e-07	3.80771e-06
SERPING1	-4.0698	3.13658e-07	3.81122e-06
JUND	-3.95625	3.22831e-07	3.90896e-06
SH3GL1	-4.09026	3.54917e-07	4.2825e-06
GNAS	-3.39541	3.61943e-07	4.35211e-06
C1orf116	-4.14616	3.64133e-07	4.36329e-06
CHMP4B	-4.35372	3.83795e-07	4.58304e-06
STEAP4	-3.83733	3.92764e-07	4.67403e-06
CTTN	-3.9767	3.94606e-07	4.67987e-06
RRBP1	-3.46327	4.00356e-07	4.73185e-06
UBE2D3	-3.2853	4.24462e-07	4.9997e-06
H2BC4	-4.38906	4.48665e-07	5.26687e-06
ITM2B	-3.28555	4.79148e-07	5.6057e-06
NPTN	-4.14882	4.8893e-07	5.70089e-06
TMPRSS11A	-4.24107	5.08818e-07	5.91288e-06
BHLHE40	-3.64774	5.96914e-07	6.91342e-06
HSPA1A	-3.15726	6.05662e-07	6.99135e-06
TMCO4	-4.29604	6.2525e-07	7.19349e-06
IFRD1	-3.81848	7.16805e-07	8.1924e-06
RAB1A	-4.3048	7.16751e-07	8.1924e-06
ALDH1A3	-4.27776	7.34993e-07	8.37263e-06
LAMB3	-4.02157	7.53117e-07	8.55096e-06
AGFG2	-4.09041	7.76985e-07	8.79313e-06
A2ML1	-3.14153	8.39676e-07	9.47166e-06
HNRNPC	-3.60453	8.76184e-07	9.8195e-06
EHD1	-4.05517	8.7405e-07	9.8195e-06
PTTG1IP	-3.47648	9.64048e-07	1.07693e-05
FAM102A	-3.9119	1.03276e-06	1.14998e-05
RPL36AL	-3.79202	1.05197e-06	1.16762e-05
PIM1	-3.95826	1.0826e-06	1.19778e-05
RNF145	-3.92836	1.11099e-06	1.22527e-05
ACTR3	-3.83405	1.1455e-06	1.25932e-05
RAB1B	-4.03372	1.15061e-06	1.26094e-05
SH3GLB2	-3.85804	1.17467e-06	1.28325e-05
ATP6V1G1	-3.48373	1.18166e-06	1.28682e-05
CHMP1B	-3.89222	1.25192e-06	1.35906e-05
NECTIN4	-4.18012	1.27936e-06	1.38451e-05
TMEM127	-3.94976	1.28747e-06	1.38463e-05
TMSB4X	-2.61596	1.28369e-06	1.38463e-05
SDC1	-4.03351	1.34166e-06	1.43844e-05
DSTN	-3.04675	1.37977e-06	1.47474e-05
ATP6V1E1	-3.91321	1.44986e-06	1.54488e-05
TAP1	-3.9264	1.46113e-06	1.55212e-05
SERPINB2	-4.04324	1.6138e-06	1.70905e-05
PDCD6IP	-4.02457	1.74789e-06	1.84541e-05
SLK	-3.6846	1.76516e-06	1.85587e-05
TXNRD1	-3.17006	1.76852e-06	1.85587e-05
CLTB	-3.83891	1.90562e-06	1.99371e-05
ELOB	-3.48703	1.92278e-06	2.0056e-05
TAX1BP1	-3.20205	2.07026e-06	2.15294e-05
RPS27L	-2.79049	2.11989e-06	2.19796e-05
VDAC2	-3.28647	2.41207e-06	2.49343e-05
GOLPH3	-3.92864	2.4817e-06	2.55777e-05
EZR	-3.15197	2.56595e-06	2.63676e-05
ADIRF	-3.50559	2.65885e-06	2.7161e-05
YOD1	-4.21508	2.65189e-06	2.7161e-05
TOP1	-3.55554	2.89177e-06	2.94535e-05
SOD2	-3.88511	2.93114e-06	2.9767e-05
SECISBP2L	-3.78957	2.94124e-06	2.97822e-05
MMADHC	-3.80412	3.05919e-06	3.08863e-05
GPCPD1	-3.54821	3.07999e-06	3.10058e-05
CDC42SE1	-4.00072	3.24077e-06	3.25298e-05
TPD52L2	-3.81524	3.34505e-06	3.34795e-05
DNAJC5	-4.24835	4.12305e-06	4.11474e-05
NAPRT	-3.76034	4.28229e-06	4.26137e-05
CDKN1B	-4.00016	4.34314e-06	4.30954e-05
SUSD6	-3.42672	4.73684e-06	4.68676e-05
CLK1	-3.97774	4.89375e-06	4.82822e-05
ARF4	-4.05588	4.92176e-06	4.84206e-05
YWHAG	-3.96562	4.95797e-06	4.86387e-05
TMEM30A	-3.906	5.20177e-06	5.07974e-05
B4GALT5	-3.50591	5.20735e-06	5.07974e-05
FAM107B	-3.5445	5.2244e-06	5.08205e-05
TMEM229B	-2.54553	5.27502e-06	5.11691e-05
CD55	-3.71534	5.45137e-06	5.27321e-05
THOP1	-3.73031	5.66678e-06	5.46631e-05
HOPX	-2.85557	5.88583e-06	5.66184e-05
RPL41	-3.37431	5.98489e-06	5.74118e-05
TPI1	-3.01337	6.00917e-06	5.74855e-05
H1-0	-3.69692	6.08469e-06	5.80476e-05
PDP1	-3.79926	6.29385e-06	5.98781e-05
YTHDC1	-3.49113	6.48873e-06	6.15629e-05
PCBP2	-3.83473	6.54166e-06	6.18955e-05
SARAF	-3.40876	6.62529e-06	6.2516e-05
SMIM5	-3.44878	6.89877e-06	6.49197e-05
ZFAND6	-3.2859	7.29959e-06	6.85054e-05
GM2A	-3.83731	7.51315e-06	7.0319e-05
SLC35E3	4.60173	7.8997e-06	7.37376e-05
COX6B1	-3.4104	8.06326e-06	7.48607e-05
ASPRV1	-3.91602	8.06287e-06	7.48607e-05
VPS4B	-3.56774	8.13205e-06	7.52975e-05
SELENOK	-3.58174	8.26066e-06	7.62844e-05
JUP	-2.69654	8.40718e-06	7.70858e-05
SH3BGRL2	-3.80037	8.41196e-06	7.70858e-05
CSNK1E	-2.65519	8.41421e-06	7.70858e-05
ABI1	-3.78527	8.73816e-06	7.98423e-05
TRIP6	-3.6754	8.89834e-06	8.1092e-05
KRT16	-3.90842	8.98766e-06	8.1691e-05
FAM89B	-3.86937	9.14743e-06	8.29255e-05
TMEM40	-2.80486	9.9979e-06	9.02479e-05
MALAT1	-2.74946	1.00073e-05	9.02479e-05
RAB5C	-3.42677	1.02257e-05	9.19785e-05
GNG12	-3.37597	1.06902e-05	9.59075e-05
STS	-3.1219	1.11215e-05	9.95191e-05
YBX3	-3.50267	1.1356e-05	0.000101356
PDLIM5	-3.17496	1.17031e-05	0.000104184
FOXQ1	-3.84751	1.17409e-05	0.000104253
JUN	-3.74097	1.20459e-05	0.000106687
GRN	-3.39795	1.27387e-05	0.000112536
DDX17	-3.63123	1.30036e-05	0.000114584
LRP10	-2.88554	1.31312e-05	0.000115414
LOC105371730	-3.89324	1.33743e-05	0.000117254
RASSF7	-3.94244	1.34253e-05	0.000117404
TUBB4B	-3.88291	1.34681e-05	0.000117481
BTG2	-4.20432	1.39101e-05	0.000121032
TRAF4	-3.67471	1.49943e-05	0.000129813
IST1	-3.47183	1.49575e-05	0.000129813
EFHD2	-3.59105	1.50709e-05	0.000130151
HSPH1	-3.29137	1.65042e-05	0.000142174
ABRACL	-3.59678	1.67285e-05	0.000143749
MYO15A	4.21381	1.69415e-05	0.000145219
CAPN5	-3.54244	1.69935e-05	0.000145305
MAPK6	-3.79082	1.73076e-05	0.000147361
BLVRB	-3.62267	1.7319e-05	0.000147361
SAMD9	-3.48034	1.75474e-05	0.000148938
SRP14	-3.643	1.77536e-05	0.00015032
RBM47	-3.00805	1.79234e-05	0.000151387
UBALD2	-3.96551	1.82452e-05	0.000153731
PSENEN	-3.71033	1.84665e-05	0.000155217
ND3	-0.988665	1.89136e-05	0.00015859
KRT80	-4.16596	2.0591e-05	0.000172238
TXNDC17	-3.84201	2.07122e-05	0.000172834
LAPTM4A	-3.56359	2.09545e-05	0.000174436
HECA	-3.80255	2.16779e-05	0.000180025
RAB11A	-3.60617	2.20426e-05	0.000182616
DNAJA4	-3.75825	2.30633e-05	0.000190162
H2BC5	-3.87506	2.30113e-05	0.000190162
HMGN1	-3.54926	2.33698e-05	0.000192232
CDC34	-3.70816	2.34858e-05	0.000192273
SDCBP	-2.99919	2.34629e-05	0.000192273
BCAS1	-2.74981	2.41163e-05	0.000196969
PIP	-3.83164	2.5829e-05	0.000210461
ZFAND2A	-3.51552	2.6415e-05	0.00021473
SECTM1	-3.77486	2.73166e-05	0.000221539
SAP18	-3.26759	2.77144e-05	0.00022424
VMP1	-3.33767	2.77964e-05	0.00022438
ABCC3	4.30979	2.82599e-05	0.00022759
UBE2D1	-3.57706	2.89728e-05	0.00023279
STAP2	-3.38486	2.95671e-05	0.000237016
DEDD2	-3.46967	3.04993e-05	0.000243924
CDC42	-3.07312	3.16582e-05	0.000252609
MROH6	-3.46836	3.22244e-05	0.000256536
F11R	-3.62715	3.24057e-05	0.000257387
IRF2BP2	-3.23277	3.2945e-05	0.000261072
RPL28	-2.55594	3.3366e-05	0.000263805
SEC14L1	-3.32704	3.35452e-05	0.000264617
ARHGEF10L	-3.85119	3.38245e-05	0.000266214
GPBP1	-3.50163	3.42867e-05	0.00026924
ICAM1	-3.35163	3.43699e-05	0.000269282
CAP1	-3.08212	3.65357e-05	0.000285605
ACTR2	-2.84804	3.83847e-05	0.000299383
NFE2L2	-3.61171	3.88333e-05	0.000302202
KLHL24	-3.24435	3.92911e-05	0.000305079
WBP2	-3.19947	3.97194e-05	0.000307714
BBLN	-3.75263	4.04416e-05	0.00031261
S100A12	-3.86082	4.14343e-05	0.00031957
BRI3	-3.38385	4.15925e-05	0.000320077
GADD45A	-3.22339	4.241e-05	0.000325645
RNF223	-3.40327	4.25079e-05	0.000325674
CCDC69	-3.29731	4.46148e-05	0.000341062
MKNK2	-3.13108	4.48256e-05	0.000341918
RABGAP1L	-3.50321	4.61856e-05	0.000351518
CTSB	-2.00103	4.69308e-05	0.000356406
GID8	-3.5169	4.76014e-05	0.000360614
PWWP2B	-3.80762	4.76932e-05	0.000360614
RASSF5	-3.3726	4.89387e-05	0.000369226
PPP1R3C	-3.62064	5.48316e-05	0.000412786
UBL5	-3.5127	5.58297e-05	0.000419389
BACE2	-3.54902	5.60019e-05	0.000419772
FAU	-3.22418	5.65213e-05	0.00042275
SREK1IP1	-3.06392	5.76586e-05	0.000429824
MYD88	-3.69778	5.77153e-05	0.000429824
SERINC2	-3.12843	5.84623e-05	0.000434453
IVL	-3.61066	5.96115e-05	0.000442044
DDX3X	-2.98406	6.04065e-05	0.000446983
ANKRD13A	-2.93067	6.16698e-05	0.000455357
TNFSF10	-2.83259	6.19372e-05	0.000456359
TSPAN1	-3.3788	6.25835e-05	0.000460142
ANKRD37	-3.40322	6.31355e-05	0.000463217
SCNN1B	-3.20971	6.38005e-05	0.000467106
SELENOW	-2.8386	6.61974e-05	0.000483632
IFNAR1	-3.11019	6.64101e-05	0.000484164
CAPNS1	-3.39179	6.81044e-05	0.000495474
NWD1	4.05946	7.02355e-05	0.000509907
TRIR	-3.54923	7.21145e-05	0.000522453
MYZAP	-3.38146	7.23758e-05	0.000523252
ADAM9	-2.8206	7.4971e-05	0.000540884
LINC01588	3.87568	7.51595e-05	0.000541117
PPP4C	-3.19475	7.65814e-05	0.00055021
GCOM1	-3.93127	7.78288e-05	0.000558015
GCC2	-3.20741	7.88898e-05	0.000564454
ZFP36L2	-3.17666	8.01e-05	0.000571931
CNOT1	-3.39562	8.03771e-05	0.000572728
ARL8B	-3.60101	8.1419e-05	0.000578961
OSER1	-3.57388	8.20013e-05	0.000581907
CYTH1	-3.62054	8.30968e-05	0.000588475
FTL	-1.71187	8.38349e-05	0.00059249
GTF2B	-3.53373	8.60226e-05	0.000605939
CYTOR	-3.18094	8.60878e-05	0.000605939
ARL4C	-3.26787	8.79226e-05	0.000617598
WDR1	-2.71308	8.8476e-05	0.000620227
C6orf132	-2.66354	8.88505e-05	0.000621595
CNN3	-3.67939	8.97867e-05	0.000625616
NOP10	-3.14615	8.9764e-05	0.000625616
NAA50	-3.46293	9.07847e-05	0.0006313
R3HDM4	-3.51489	9.28661e-05	0.000644479
CXADR	-3.63291	9.73082e-05	0.000673957
TRIM29	-3.05167	9.91963e-05	0.000685662
VGLL1	-3.56464	0.000101784	0.000702149
GRHL1	-2.68304	0.000102916	0.000708543
ATP5MJ	-3.63333	0.000104167	0.000715733
PPM1A	-3.51158	0.000105947	0.000726526
GRB7	-3.17203	0.000106872	0.00073072
PROM2	-3.39064	0.000107174	0.00073072
CNBP	-3.11407	0.000107192	0.00073072
PRRC2C	-2.87851	0.000107568	0.000731236
UQCR10	-3.13705	0.00010769	0.000731236
CTSH	-2.87536	0.000108244	0.000733562
ANXA2	-2.38242	0.000110526	0.000747558
PKN2	-3.54812	0.000111344	0.000751628
LAMTOR1	-3.42176	0.000111925	0.000752612
CIB1	-3.39306	0.000111921	0.000752612
EPB41	3.80162	0.000114042	0.000765362
GALNT1	-3.35753	0.000114682	0.00076817
ERV3-1-ZNF117	-3.54741	0.00011672	0.000780313
PPP4R1	-3.09739	0.00011733	0.000782878
RPS6	-2.46573	0.000117917	0.000785282
MAP1LC3A	-3.28295	0.000119963	0.000797375
GAPDH	-2.20868	0.000121444	0.000805671
CELF5	4.17916	0.000121918	0.000807267
RNF11	-3.51215	0.000125053	0.000826449
DNAJA1	-2.63576	0.000126304	0.000833126
PTMA	-2.95532	0.000127438	0.00083901
RBM39	-2.95055	0.000128111	0.000841835
H2AW	-3.54882	0.000128724	0.000844264
ARPC5	-3.04478	0.000130653	0.000855296
RIN3	-3.52776	0.000131757	0.000860896
TUFT1	-3.32146	0.000132271	0.000862075
CALM3	-3.25881	0.000132435	0.000862075
ZFAS1	-2.97433	0.000133518	0.00086749
RPS29	-2.24839	0.000136857	0.000887519
RPL34	-2.28537	0.000144387	0.000934604
CCNL1	-3.14953	0.000145283	0.000938648
DYNLRB1	-3.40422	0.000146378	0.000943959
SOX4	-2.19196	0.000150557	0.000969103
CRYAB	-3.1281	0.000151627	0.000974185
ESRRA	-3.71368	0.000153063	0.00098159
PADI1	-3.46227	0.000153362	0.000981688
PRR13	-3.2866	0.000165081	0.00105475
TMA7	-3.29058	0.000168191	0.00107264
HNRNPF	-3.26651	0.000170297	0.00108408
RPL15	-2.64009	0.000171203	0.00108785
CST3	-3.00063	0.000171773	0.00108947
S100A14	-4.10516	0.000172523	0.00109222
KLF6	-2.75281	0.000173104	0.00109391
SLC49A4	-3.30557	0.00017394	0.00109718
TNFAIP3	-3.71014	0.00017459	0.00109928
NDFIP1	-2.94405	0.000176362	0.00110736
H2BC21	-3.50228	0.000176513	0.00110736
ARF1	-2.90418	0.000180622	0.00113109
RPLP0	-2.59863	0.000186024	0.00116282
ACAD8	-3.37729	0.000186716	0.00116504
MGAT1	-3.00773	0.000187677	0.00116696
LAMTOR5	-3.43133	0.000187697	0.00116696
EDN2	-3.31613	0.000191532	0.00118867
ATM	3.99639	0.000194699	0.00120616
RERE	-2.8877	0.000200163	0.0012378
HMGB2	-3.44928	0.000203855	0.00125838
TGFA	-3.46295	0.000204831	0.00125991
FAM3D	-3.42677	0.000204766	0.00125991
KCP	3.831	0.000208871	0.00128249
TWF1	-3.39456	0.00021079	0.00129197
CACNA1A	2.59404	0.000213451	0.00130597
POLR2A	-2.66648	0.000213903	0.00130643
ALDOB	-3.07761	0.000218972	0.00133503
MACO1	-3.44947	0.000233038	0.0014183
P4HB	-3.19062	0.000235276	0.0014294
PNRC1	-2.97708	0.000236442	0.00143397
RALA	-3.08989	0.000245515	0.0014864
ZNRF1	-3.38655	0.00025624	0.00154862
LEPROT	-2.99406	0.00026259	0.00158423
CDKN1C	-3.00684	0.000263165	0.00158494
PFKP	-3.45265	0.000265133	0.00159402
SPINT1	-2.60384	0.000274145	0.00164534
PSME1	-3.22311	0.000276878	0.00165887
SLC12A6	-2.42198	0.000280292	0.00167643
RABEP2	4.01647	0.000280992	0.00167771
MT1E	-3.01282	0.000289854	0.00172765
ANKRD12	-2.25596	0.000295134	0.0017561
SPAG1	-3.06385	0.000296883	0.00176347
YPEL3	-2.38238	0.000297531	0.0017643
CKB	-3.18436	0.000304841	0.00180455
MAP2K3	-3.23184	0.00031137	0.00183692
CTNNA1	-2.49759	0.000311311	0.00183692
UBE2L6	-3.191	0.000317556	0.00187023
RB1CC1	-3.43493	0.000320121	0.00188213
CD164	-3.04546	0.00032446	0.00190442
IFNGR2	-2.83361	0.000325069	0.00190476
UBE2H	-2.91261	0.000329756	0.00192896
MYL12B	-2.68965	0.000332077	0.00193926
LRATD1	-2.79858	0.000335949	0.00195857
ABTB2	-3.46556	0.00033855	0.00197042
FOXC1	-3.74524	0.000339137	0.00197052
KAZN	-3.01271	0.000340463	0.00197492
PPIF	-3.79332	0.000341256	0.0019762
ALDH7A1	3.72638	0.000342099	0.00197778
CD63	-2.62903	0.000347285	0.00200441
PTGES	-3.20379	0.000348976	0.00201082
FAM230C	3.73728	0.000352425	0.00202732
CXCL16	-2.88519	0.000353256	0.00202873
CNN2	-2.97516	0.00035466	0.00203342
N4BP1	-3.10037	0.000356969	0.00204328
ARHGAP27	-2.43755	0.000372849	0.00213065
CASP7	-3.20453	0.000393548	0.00224524
PAX9	-3.22362	0.000394461	0.00224674
GNB1	-2.63591	0.000399986	0.00227447
MLPH	-3.05915	0.000403423	0.00229025
SDC4	-3.10421	0.000408415	0.0023148
TOR1AIP2	-2.58883	0.000410602	0.00232339
VSIG10L	-3.11021	0.000420495	0.00237549
SMS	-2.80418	0.000428627	0.00241748
BCL10	-3.48466	0.000431086	0.0024274
LOC284930	3.87759	0.000448509	0.00252141
CNOT8	-3.49872	0.000453991	0.00254397
HNRNPK	-2.96869	0.000453725	0.00254397
QSOX1	-2.48335	0.000473789	0.00265062
ARF6	-3.19925	0.000484646	0.00270263
KCNQ1OT1	2.84586	0.000484126	0.00270263
PNPLA2	-3.22388	0.000485859	0.00270503
PSMC6	-3.20117	0.000486746	0.00270562
DNAJB1	-2.40645	0.000487639	0.00270624
B3GNT5	-2.9558	0.000490454	0.00271751
LINC00673	3.48378	0.000494971	0.00273815
CYP20A1	3.83001	0.000512359	0.00282982
ALDH2	3.72891	0.000537256	0.00295685
AVPI1	-2.92459	0.000538774	0.00295685
EIF3H	-3.2765	0.000538284	0.00295685
RAD21	-3.1266	0.000536319	0.00295685
NR4A1	-2.94448	0.000540762	0.00296307
CCNI	-2.46423	0.000542608	0.00296848
PDE11A	3.7377	0.000547743	0.00299185
DDR1	-3.1361	0.000573238	0.00312618
MYEOV	-3.18372	0.000576109	0.00313197
ASPH	-3.43235	0.000575603	0.00313197
DUSP6	-3.48432	0.000591693	0.00321165
ARPC1A	-2.93665	0.000597189	0.00323641
CARHSP1	-2.47293	0.000604763	0.00327234
FAM126A	3.84799	0.000608198	0.00328579
MT1G	-2.25724	0.000614597	0.00331518
KRT7	-2.60863	0.000617143	0.00332374
UBA52	-2.76204	0.00062104	0.00333954
C16orf72	-2.97621	0.000633816	0.00340296
MAP3K20	3.47455	0.000645664	0.0034612
GUK1	-2.72421	0.000647951	0.00346809
TRIM2	-3.2481	0.000656999	0.00351109
PPP1R15B	-3.31977	0.000658639	0.00351443
UBE2R2	-2.50406	0.000662966	0.00353208
RANBP9	-2.93072	0.00067332	0.00357697
ZNF185	-3.23752	0.000673457	0.00357697
KRT23	-2.876	0.000682516	0.00361953
MTPN	-3.30407	0.000689567	0.00365133
ABCB9	3.87652	0.000703922	0.00372165
ASCC2	-2.74754	0.000708735	0.00374139
KRT18	-2.52924	0.000714603	0.00376662
ABI2	3.78029	0.000720939	0.00379424
CIRBP	-3.13644	0.000725884	0.00381447
MACROH2A1	-2.63003	0.000733374	0.00384799
FOS	-3.00979	0.000753751	0.00394892
SRA1	-3.2112	0.000761528	0.00398364
PTBP3	-2.92881	0.000763017	0.00398541
PTRH1	3.42234	0.000786582	0.00410231
NCK2	-2.83153	0.000789327	0.00411044
PERP	-2.80238	0.000804632	0.00418384
SCAND1	-2.9613	0.000821958	0.00426753
VWA1	-2.93086	0.00083709	0.00433958
ABHD3	-3.01573	0.000847398	0.00438646
SYAP1	-2.66136	0.000858041	0.00442831
SERTAD1	-2.87626	0.000857331	0.00442831
CLTA	-2.85338	0.000876579	0.00451725
CD24	-2.48801	0.000891175	0.00458565
CCDC186	-3.04107	0.000893789	0.00459227
CDK13	2.85369	0.000895939	0.0045965
FAM83D	-3.06666	0.000919913	0.00471252
RAB18	-2.98202	0.000926495	0.00473922
ZDHHC14	3.73386	0.000928143	0.00474065
MTCH1	-3.21587	0.00093371	0.00476206
VIM	3.69962	0.000937437	0.00477403
DDX5	-2.73707	0.000985067	0.00500923
NMRK1	-3.02231	0.000988251	0.00501806
HDAC7	-3.00401	0.00099539	0.0050469
NDUFB11	-2.81227	0.000999995	0.00506284
NLRP1	3.31319	0.0010028	0.00506965
EHF	-2.74567	0.00101538	0.00511829
ZNF397	3.5955	0.00101402	0.00511829
IFT22	3.2813	0.00103014	0.00518512
RAB11FIP1	-2.50007	0.00104641	0.00525936
AP3D1	-3.22487	0.00107354	0.00538015
DNAH14	3.79521	0.00107208	0.00538015
DHX32	-3.11422	0.00109347	0.00547208
KLK6	-2.80725	0.00109613	0.00547746
PARP14	-3.00578	0.0011013	0.0054954
DISP2	3.52775	0.00110495	0.00550567
KYNU	-3.18435	0.00111231	0.00553437
KDM5C	-3.15331	0.00113047	0.00561668
RPS16	-2.41221	0.00113813	0.00564661
RYBP	-3.05698	0.00117377	0.00581514
CTSA	-2.85393	0.00117809	0.00582817
REEP4	-3.38793	0.00119264	0.00589172
WDR26	-2.85504	0.0011947	0.00589351
CLIC3	-3.46649	0.00120076	0.005915
CXXC5	-2.98226	0.00120848	0.00594453
FLII	-3.21848	0.00121823	0.00597554
TAX1BP3	-3.11601	0.00121739	0.00597554
TEAD1	-2.55631	0.00122419	0.00599628
AMOTL2	-3.30727	0.00123986	0.00606445
LRATD2	-3.0832	0.00124312	0.00607183
TTLL3	3.6091	0.00125316	0.00611226
ITGB8	-2.3122	0.00125821	0.00611392
OPA3	3.40598	0.0012588	0.00611392
RNF41	3.37625	0.00125799	0.00611392
SH3GLB1	-2.90903	0.0012654	0.00613738
HNRNPU	-2.38587	0.00127852	0.00619232
TSG101	-2.65496	0.00132913	0.00641056
BAG3	-2.73586	0.00132788	0.00641056
MFSD4A	-2.50434	0.0013279	0.00641056
PIGN	3.24096	0.00134692	0.00648732
QKI	-2.65472	0.0013619	0.00655035
OAS1	-2.7845	0.00137923	0.00660619
VCP	-2.52197	0.00137798	0.00660619
MORF4L1	-2.64077	0.00137552	0.00660619
SUMO2	-2.80312	0.00138999	0.00664851
RNF169	-2.88577	0.00139548	0.00666559
SKP1	-2.3983	0.00142777	0.0068028
WASF2	-2.23401	0.00142814	0.0068028
WDR12	3.68279	0.00146051	0.00694744
UBE2M	-3.43774	0.00147354	0.0069998
GLRX	-2.676	0.00150175	0.00712407
GPBP1L1	-2.97107	0.00150789	0.0071434
NANS	-2.28119	0.00153672	0.00727005
HERC2	2.87185	0.00154097	0.0072802
PGBD5	3.30826	0.00154882	0.00730733
SCNN1A	-2.6766	0.00155465	0.00732485
CHP1	-2.30414	0.00158121	0.00743987
EDF1	-2.50141	0.00158401	0.00744293
RPS20	-2.55361	0.00164004	0.00769572
LRRFIP1	-2.06138	0.00165137	0.00772797
SCNN1G	-2.73219	0.00164947	0.00772797
LRG1	-2.69712	0.00166476	0.0077801
PAPSS2	-2.44323	0.00166856	0.00778735
RAP2B	-3.48002	0.00169493	0.0078998
TCOF1	3.7463	0.00171385	0.00797723
TBL1XR1	-2.74138	0.00171748	0.00798341
ABL2	3.64582	0.00173068	0.00803397
ACTN4	-2.13009	0.00174732	0.00808951
SON	-2.6404	0.00174634	0.00808951
SLC35B3	-3.18673	0.00175494	0.00810982
UBA6-AS1	3.52285	0.00175639	0.00810982
MARCHF5	-3.12316	0.00176464	0.00812628
EPIST	-3.34756	0.00176367	0.00812628
EIF4A2	-3.14422	0.00176925	0.00813669
RESF1	-2.93866	0.00179052	0.00822356
LYN	-2.40818	0.00179456	0.00823119
EDEM1	-3.26888	0.00182099	0.00834137
PPP2CA	-2.91953	0.00182703	0.00834697
LOC101928035	3.56461	0.00182572	0.00834697
RPS6KA5	2.73857	0.00185236	0.00845152
POU2F2	3.36103	0.00188846	0.00860494
OSTF1	-2.94113	0.0019166	0.00872166
PLEKHF1	-3.19539	0.00194684	0.00884765
TRIB1	-2.80454	0.0019526	0.00886221
DCAF12	-3.29302	0.00196559	0.00890947
TC2N	-3.04934	0.00197915	0.00895921
ZFAND3	-2.84123	0.00201966	0.00911877
LINC01206	3.0301	0.00201928	0.00911877
ERBIN	-2.54623	0.00204568	0.00921245
ZNF271P	3.31915	0.00204573	0.00921245
IRAG2	-3.19885	0.00206499	0.00928709
MPRIP	-2.49309	0.00207495	0.00931976
RYR1	3.07924	0.00211469	0.00948595
TTL	3.5832	0.00213502	0.00956479
VPS37B	-3.43232	0.00216469	0.00967267
SNAP47	3.64906	0.00216429	0.00967267
DHRS4-AS1	3.56479	0.00217564	0.00970906
RNF103	-3.20673	0.00219187	0.00976892
LINC00476	3.76478	0.0022013	0.00979834
RPL38	-2.92209	0.00220692	0.00981074
CAPN1	-2.33627	0.00222487	0.00987783
SERTAD2	-2.54745	0.00225222	0.0099865
HSP90AB1	-2.31421	0.00229108	0.0101458
HNRNPD	-2.72698	0.00230028	0.0101735
MAT2B	-3.17797	0.00230597	0.0101857
MLH1	3.57389	0.002317	0.0101957
CPEB4	-2.85274	0.00231707	0.0101957
LINC02681	3.47533	0.00231215	0.0101957
RPL9P8	-3.24649	0.0023265	0.0102242
HSBP1	-2.51825	0.00234709	0.0103016
UQCR11	-2.50722	0.00236497	0.010367
FCHO2	-2.89166	0.00241394	0.0105682
SPSB3	-3.15918	0.00242042	0.0105832
MMS22L	3.35939	0.00243065	0.0106145
BEST1	-2.47409	0.00254445	0.0110975
COX8A	-2.6041	0.00260547	0.0113494
PLAU	-2.97559	0.00262832	0.0114345
POLB	-3.12323	0.00263269	0.0114391
SLC1A2	3.16515	0.00265239	0.0115103
BCL6	-2.37727	0.00269255	0.01167
GREM1	3.53615	0.0027155	0.0117547
FAM227A	3.36488	0.00272305	0.0117727
GSR	-2.71609	0.00279105	0.0120516
STAT2	-2.58199	0.00279807	0.0120669
STK39	-2.85198	0.00280723	0.0120913
MIEN1	-3.12027	0.00284268	0.0122288
MMP24OS	-2.56649	0.00286784	0.0123218
CAPZA1	-2.80382	0.00288601	0.0123691
RPL11	-2.6241	0.00288492	0.0123691
MORF4L2	-3.14734	0.00290247	0.0124243
SSBP3	-2.40766	0.00294683	0.0125986
C20orf194	4.59195	0.00297767	0.0127148
BCAM	3.44845	0.00298605	0.0127348
CEACAM1	-2.50286	0.00301734	0.0128428
SLC16A10	3.62827	0.00302621	0.0128428
SCO1	3.49728	0.00302594	0.0128428
CHST12	3.57352	0.00302375	0.0128428
RPL7L1	3.44013	0.00303563	0.0128671
ISCU	-2.58383	0.00306129	0.01296
SIRPA	-3.19467	0.00307807	0.0130151
ABHD17B	-2.71637	0.00308998	0.0130495
CSRNP1	-3.07524	0.00316795	0.0133625
LOC101927745	3.61357	0.00318198	0.0134054
COL1A1	2.9376	0.00321756	0.0135388
JPT1	-2.67162	0.00331002	0.0139109
SUB1	-2.8716	0.00332047	0.0139211
COX3	0.475739	0.00331813	0.0139211
SRGAP3	3.11657	0.00336708	0.0140994
DAD1	-2.73309	0.00344449	0.0144061
TRIM28	-3.00798	0.00344977	0.0144108
MUC20	-2.11521	0.00345645	0.0144213
RALY	-2.76005	0.0034878	0.0145346
CTDSP2	-3.10045	0.00351172	0.0146167
COPE	-2.68547	0.00352569	0.0146492
TMEM192	3.32039	0.00353223	0.0146492
LOC101927837	3.54977	0.00353055	0.0146492
SLC16A1-AS1	2.68549	0.00354984	0.0147046
CLCA4	-2.91573	0.00357325	0.0147487
DNAH3	3.0298	0.00357129	0.0147487
PFKFB3	-2.721	0.00356581	0.0147487
TGFBR3	3.33917	0.00360384	0.0148396
YTHDF3	-3.1664	0.00360002	0.0148396
WDR59	2.78069	0.00361602	0.0148721
BIRC6	3.0866	0.00363491	0.014932
UBAP1	-2.83287	0.00367836	0.0150926
RHEB	-2.80779	0.00373099	0.0152905
TMEM54	-3.05736	0.00374757	0.0153402
EIF3A	-2.44221	0.00382665	0.0156454
VAPA	-2.0978	0.00384974	0.0157213
LOC339192	3.63101	0.00385546	0.0157261
ST14	-2.46547	0.00388078	0.0158108
ELP6	3.22942	0.00388663	0.015816
MIR646HG	3.41792	0.00391683	0.0159201
BUD31	-2.87228	0.00398863	0.016174
FBRS	-2.63632	0.00398609	0.016174
UBE2K	-2.33105	0.00405557	0.0164262
MBP	-2.45826	0.00411404	0.0166436
PLS3	-2.82155	0.00412774	0.0166795
LNX1	-2.08737	0.00420581	0.0169752
RNF7	-2.94494	0.00424061	0.0170957
GABARAPL1	-2.34729	0.00425229	0.0171229
RPS19	-2.15433	0.00428962	0.0172531
PLPP2	-2.88218	0.00432087	0.0173587
TYRO3	3.07496	0.00437296	0.0175476
LOC112268148	-1.84294	0.00442318	0.0177286
GBP3	-3.09836	0.00444627	0.0178005
TBC1D15	-2.62945	0.00447595	0.0178986
SYNE1	3.17978	0.00455665	0.0182003
OSBPL3	-2.96456	0.00472039	0.0188326
LASP1	-2.26398	0.00473505	0.0188577
FAM136A	-2.68314	0.00473756	0.0188577
PRDM15	3.3364	0.00476348	0.0189391
LINC00689	3.56061	0.00481912	0.0191383
ZNF790-AS1	3.08073	0.00482805	0.0191518
USP8	2.65735	0.00490176	0.0193632
RASGEF1B	-2.61727	0.00490375	0.0193632
ZNF699	2.98721	0.00490006	0.0193632
INF2	-3.01049	0.00489204	0.0193632
FHIP2B	-3.02596	0.0049093	0.0193632
LINC01304	3.35712	0.0049442	0.0194787
LINC01550	2.9943	0.00500555	0.019698
DEPDC5	2.57266	0.00501468	0.0197115
PPP1CA	-2.3808	0.00514496	0.0202007
HNRNPA0	-2.86049	0.0051865	0.0203407
TNFAIP8	2.93685	0.0051957	0.0203538
TRRAP	3.04472	0.00522714	0.0204538
CSDE1	-2.5844	0.00525647	0.0205453
PDXK	-2.99407	0.00526328	0.0205488
YWHAE	-2.24167	0.00527128	0.0205568
RNH1	2.94693	0.00528643	0.0205927
LMOD3	2.92326	0.00532058	0.0207024
NRDE2	3.28607	0.00533723	0.0207439
MED17	3.11294	0.00539749	0.0209546
AFDN	-2.62353	0.00542898	0.0210532
PCNX2	3.41565	0.0054951	0.0212632
CPAMD8	3.07632	0.00550153	0.0212632
ARHGEF28	3.19905	0.00549977	0.0212632
COX4I1	-2.2837	0.00553147	0.0213551
SPECC1	-2.09229	0.00554556	0.0213856
DPP6	3.09757	0.00560519	0.0215915
TYW5	2.97149	0.00561977	0.0216236
SH3BGRL3	-2.07036	0.00562826	0.0216323
SLC4A8	3.15333	0.00565937	0.0217277
BRD2	-3.06994	0.00568675	0.0218087
RSKR	3.15044	0.0057341	0.0219659
SPATS2	3.36029	0.0057731	0.0220909
RBPMS	-2.35439	0.00584513	0.0223223
RALGDS	-2.8093	0.00584647	0.0223223
IAH1	2.70641	0.00591526	0.0225601
FLNB	3.55187	0.00596568	0.0227125
CAPN2	-2.06069	0.00596836	0.0227125
ATP7B	3.05513	0.00597577	0.0227158
RPL9	-1.90834	0.00600291	0.022769
KLHDC8B	-2.62329	0.00599719	0.022769
DCAF11	2.93943	0.0060451	0.0227854
C18orf25	-2.63033	0.00603419	0.0227854
ITGA2	-2.39294	0.00603924	0.0227854
MGA	2.64943	0.00604161	0.0227854
B3GNT8	-2.88286	0.00604673	0.0227854
SERPINA1	-2.673	0.00603752	0.0227854
UBE2G1	-2.98327	0.00605716	0.0227999
ACADVL	-2.81315	0.00609546	0.0229192
RAB2A	-2.94649	0.00612987	0.0230236
STK40	-2.81202	0.00616323	0.0231238
LOC100507516	3.39633	0.00617539	0.0231443
GPR155	3.09904	0.00618555	0.0231574
UNC13A	3.03832	0.00619417	0.0231646
CNTN2	3.2007	0.00621712	0.0232253
HSDL2	-2.75781	0.00627266	0.0233572
DDA1	-2.45921	0.00626645	0.0233572
XKR4	2.93469	0.00626314	0.0233572
APOBEC3A_B	-2.35886	0.00629397	0.0234114
KTN1	-2.56397	0.0063292	0.0235172
CD276	3.14975	0.00636445	0.0236228
WSB2	-2.63056	0.00643819	0.0238709
CHDH	2.99086	0.00644733	0.0238792
SEC31A	-2.42728	0.00651753	0.0241135
HIGD1A	-2.807	0.00653847	0.0241651
DHX57	2.74453	0.0065713	0.0242606
LSM4	-2.6058	0.0065893	0.0243011
SLC47A2	3.09594	0.00663435	0.0244412
ACSL5	2.88103	0.00665246	0.0244819
SPTSSA	-2.4984	0.00670726	0.0246574
BLOC1S1	-2.78299	0.00676917	0.0248586
SLC25A3	-2.14202	0.00678469	0.0248628
UQCRB	-2.09789	0.0067842	0.0248628
NIBAN3	3.31896	0.00681441	0.0249454
SELENOF	-2.925	0.00683263	0.0249857
EEF2	-2.28225	0.00684292	0.0249969
RELA	-2.61319	0.00688414	0.025121
TFF1	-3.06318	0.00690625	0.0251751
RAB5B	-1.91922	0.00692106	0.0252026
PLEC	-2.52855	0.00694001	0.025245
FBP1	-2.43892	0.00695779	0.0252815
BMP1	-2.59544	0.00696464	0.0252815
NAT1	-2.93902	0.00701099	0.0254231
RDH13	-2.21407	0.00703495	0.0254833
HDGF	-2.77377	0.00725481	0.0262523
FHL2	-2.17257	0.00734195	0.0265398
HNRNPH2	-2.99686	0.00746055	0.0269124
CROCCP2	2.87365	0.00745779	0.0269124
RPL36	-1.84885	0.00750326	0.0269262
MYO10	2.88341	0.00749757	0.0269262
MFSD14B	-2.77091	0.00750028	0.0269262
MYO5B	-2.62455	0.00749023	0.0269262
NET1	-2.06686	0.00749825	0.0269262
DOCK7	3.21193	0.00753188	0.026973
MAN2C1	3.39012	0.00752983	0.026973
ZNF320	3.11224	0.00762367	0.0272735
ACHE	-2.71297	0.00764364	0.0273168
PLEKHD1	3.23557	0.00766946	0.0273808
CAB39	-2.58273	0.00771373	0.0275105
VAMP8	-2.5413	0.00772852	0.0275348
VSIR	-2.40507	0.00773776	0.0275394
ATMIN	-2.33008	0.00776297	0.0276008
TTLL5	2.97998	0.00777485	0.0276147
MXI1	-2.14648	0.00779064	0.0276424
TUT4	2.90941	0.00781659	0.0277061
CTSS	-2.31505	0.00790416	0.0279878
TAPBP	-2.51527	0.00792854	0.0280455
HSP90B1	-2.04183	0.00799718	0.0282594
MGAT4B	-2.62178	0.00801763	0.0283028
SVEP1	3.31096	0.00806518	0.0283839
PSMB8	-2.69863	0.00806362	0.0283839
NUDT3	2.99513	0.00806252	0.0283839
IRF1	-1.90127	0.00807615	0.0283936
ATP6V0A2	3.03816	0.0081478	0.0286165
PNN	-2.40387	0.00818106	0.0286922
FSTL1	-2.76374	0.00818593	0.0286922
LYZ	-2.28928	0.00821768	0.0287744
NF1	2.4749	0.00823676	0.028812
HIF3A	3.42897	0.008262	0.0288711
RPS6KL1	2.72731	0.00827248	0.0288786
UBA6	-2.40348	0.00830971	0.0289794
PARVA	2.77856	0.00835045	0.0290922
PRKAG2	2.73565	0.0083741	0.0291452
CSMD2	2.68888	0.00839755	0.0291975
CLINT1	-2.27407	0.00847211	0.0294272
SESN2	-2.58411	0.00850644	0.0295099
BICDL1	-2.44519	0.00851297	0.0295099
TRIM72	2.77736	0.00852909	0.0295362
TF	2.93238	0.00854479	0.0295611
AP4M1	3.43715	0.00860966	0.0297558
MGRN1	2.47244	0.00862911	0.0297932
FTSJ1	-2.63733	0.00869268	0.0299828
MAPT	3.21515	0.00871364	0.0300252
SEMA3F	-2.79476	0.00878662	0.0301939
PSMB1	-2.8346	0.00878272	0.0301939
PRDX5	-2.23536	0.00879175	0.0301939
TLCD2	2.95358	0.00879747	0.0301939
DNMT1	2.73292	0.00880704	0.0301968
DFFA	2.8142	0.00884889	0.0303103
CAST	-2.02081	0.00886474	0.0303346
RAD9A	2.64735	0.00893221	0.0305052
RNASEH1-AS1	3.0914	0.00892711	0.0305052
GABPB2	2.81638	0.00903154	0.030814
MAP3K4	-2.58322	0.00910516	0.0310346
GALM	3.04435	0.00912727	0.0310489
CDC42EP5	-2.87734	0.00912202	0.0310489
NR1D2	-2.82667	0.00915071	0.031098
TST	-2.93167	0.00916102	0.0311026
MOB1A	-2.90305	0.00918397	0.0311499
BOD1L1	-2.32707	0.00923868	0.0313049
HIPK1	-2.3346	0.00940024	0.0318212
MCAM	3.00999	0.00942064	0.031828
PEX26	2.57925	0.00941313	0.031828
PHACTR2	-2.41614	0.00944257	0.031871
SORBS2	2.20332	0.00945522	0.0318826
C1orf167	2.95212	0.00946513	0.031885
KLRD1	3.2515	0.00948765	0.0319298
ATP6V1B2	-2.61246	0.00950731	0.0319339
MACC1	-2.29483	0.00949919	0.0319339
METTL16	3.14824	0.00952208	0.0319525
PMAIP1	-2.45709	0.00954197	0.0319668
VWA3B	3.31718	0.00954967	0.0319668
SELENOP	-2.80759	0.00955403	0.0319668
SPINK7	-2.74326	0.00958686	0.0320457
CRYM	-2.80314	0.0096943	0.0323735
RPL13A	-1.65624	0.00970934	0.0323925
SAMD9L	-2.63216	0.00973402	0.0324436
KIF19	3.31731	0.00982623	0.0327195
GLG1	3.38666	0.00984808	0.0327512
RNF141	-2.47057	0.00985467	0.0327512
CRISPLD2	3.42292	0.00987696	0.0327938
NEB	3.09315	0.0098996	0.0328375
C1GALT1	-2.68835	0.00993464	0.0328907
AATK	3.11543	0.00993369	0.0328907
SMG7	-2.46793	0.00995356	0.0329178
RARG	-2.46892	0.00996183	0.0329178
PHLDA3	-2.77199	0.00997874	0.0329422
MAP2K1	-2.59847	0.0100037	0.0329931
PIF1	2.94608	0.0100844	0.0331983
IGFBP3	-2.64635	0.0100922	0.0331983
LOC101930112	2.52633	0.0100947	0.0331983
ESAM	-2.43832	0.0101137	0.0332005
CALM1	-2.0731	0.0101145	0.0332005
ZC3H8	2.98041	0.0101297	0.0332188
UBE2A	-2.42385	0.0102055	0.0334359
PEDS1	-3.01422	0.0102905	0.0336825
RPS28	-1.80882	0.0103317	0.0337854
CBR3-AS1	3.23373	0.0103533	0.0338241
SF3B1	-2.16644	0.010392	0.0338852
ATP2A2	-2.21686	0.0104014	0.0338852
LOC100506207	2.49481	0.0103903	0.0338852
SRSF8	3.27545	0.0104807	0.0341115
CYP46A1	2.64847	0.0105022	0.0341365
KHNYN	-2.6874	0.0105081	0.0341365
CCL22	-2.79361	0.0105519	0.0342467
CACNB4	2.90406	0.010569	0.03427
ZBTB8A	3.36821	0.0105846	0.0342885
CLDN4	-1.84352	0.0107045	0.0346444
IFITM2	-3.62833	0.010763	0.0348013
GTF2A2	-2.30704	0.0108649	0.035098
PAIP2	-2.68248	0.0109002	0.0351792
KLF10	-2.47828	0.010968	0.0353373
CEBPD	-2.65302	0.0109696	0.0353373
RAB3IP	2.62115	0.0110534	0.0355744
SOX6	2.71624	0.0110671	0.0355852
RPL18	-1.85272	0.0110809	0.0355966
LINC01524	3.23683	0.0111401	0.0357535
LOC101927060	2.65146	0.0111859	0.0358675
MAPK8	-2.57551	0.0112578	0.0360646
UBA1	-2.73317	0.0112845	0.0361168
NUBPL	2.955	0.0113191	0.0361939
CNNM4	-2.79804	0.0113978	0.036412
TBC1D2	-2.54812	0.0114298	0.0364807
EIF3J-DT	2.41944	0.0114576	0.0365357
ADAMTS8	3.17623	0.0114901	0.0366056
CACUL1	-2.41623	0.0115062	0.0366231
LINC00924	2.99417	0.0115579	0.036754
PNPT1	3.17903	0.0116309	0.0369045
HSPA6	-2.76133	0.0116372	0.0369045
PNRC2	-2.76536	0.0116317	0.0369045
TUBA1B	-2.33142	0.0116904	0.0370392
TDP2	-2.75213	0.0118007	0.0373336
KSR1	2.89071	0.0118049	0.0373336
SH3BP2	-2.02848	0.0118775	0.037529
RAMP2-AS1	2.93126	0.0118895	0.0375327
LOC105371348	-2.79387	0.0119067	0.0375527
SERP1	-2.1537	0.0119373	0.0375582
SMARCC2	2.47811	0.011941	0.0375582
RPS3A	-2.06783	0.0119382	0.0375582
KCTD5	-2.93593	0.0119938	0.0376558
CYTB	0.424437	0.0119904	0.0376558
ARHGAP44	3.27481	0.0120096	0.0376715
RIT1	-2.86254	0.0120873	0.0378807
ITPR1	2.97246	0.0121552	0.0380593
DEPDC4	3.16814	0.0121877	0.0381024
COL27A1	2.909	0.012191	0.0381024
METTL8	3.2747	0.0123919	0.0386954
RPL31	-1.52423	0.012459	0.0388697
GVQW3	2.97924	0.0125359	0.0390424
LINC00662	2.63659	0.0125369	0.0390424
SLC9A3R1	-2.46788	0.0125731	0.0390658
NFIA	3.01447	0.0125895	0.0390658
ZNF292	-2.25411	0.0125726	0.0390658
LOC100507384	2.95611	0.0125891	0.0390658
C15orf40	2.58241	0.0126535	0.0392291
TFR2	2.60681	0.0127104	0.0393705
GALNT5	-2.1622	0.0127317	0.0394011
AZIN1	-2.36454	0.0127669	0.0394749
PLA2R1	2.89244	0.012798	0.0395355
ETFBKMT	2.96777	0.0128573	0.0396835
GJA8	2.91312	0.0128981	0.039774
ABCG8	2.87131	0.0129302	0.0398374
EEF1D	-2.08745	0.0129491	0.0398603
ORAI2	2.40394	0.0129975	0.0399736
ZNF285	3.19925	0.0131603	0.0404383
NAV1	2.94955	0.0133058	0.0408132
SLC28A2	3.21773	0.0133004	0.0408132
KLF3	-2.26064	0.0133447	0.0408838
ARMC9	3.23229	0.0133525	0.0408838
FOXP1	1.99555	0.0133781	0.0409262
ASS1	-2.39529	0.0133917	0.0409316
LINC00710	3.04119	0.0134055	0.0409375
RPS25	-2.5216	0.0134627	0.04104
XDH	-2.09601	0.0134625	0.04104
SLC25A51P4	2.95415	0.013494	0.0410992
BBC3	-2.75618	0.0135289	0.0411693
FUT6	-1.71192	0.0137397	0.0417739
CHKB-DT	2.87963	0.0137753	0.0418456
SRP54	-2.44446	0.0138067	0.0418676
ND1	-0.486746	0.0137947	0.0418676
DBP	-2.17226	0.0138831	0.0419626
NPRL2	3.23438	0.0138866	0.0419626
LOC105369209	-2.49209	0.0138663	0.0419626
ANGPTL4	-2.84024	0.0138718	0.0419626
GBP2	-2.07582	0.0139727	0.0421494
SYNPO2	2.61663	0.0139639	0.0421494
CGNL1	-2.34732	0.0140312	0.0422891
TNFRSF1A	-2.82347	0.0140483	0.0423038
NEU1	-2.17792	0.0141212	0.0424862
ANP32B	-2.65772	0.014146	0.042487
SFN	-2.90196	0.0141359	0.042487
LINC01504	3.03856	0.014238	0.0427263
KCNN3	2.90414	0.014265	0.0427702
TP53INP1	-2.31367	0.0142943	0.042821
HES2	3.06329	0.0143079	0.0428248
SYNJ2	3.76449	0.0143608	0.0429459
RICTOR	3.44329	0.0144144	0.0430691
STAR	3.21965	0.0144402	0.043109
KPNA6	2.93087	0.0144767	0.0431254
MCOLN1	2.40692	0.0144699	0.0431254
FAM189B	2.99672	0.0144831	0.0431254
TMEM248	-2.36208	0.0145282	0.0431786
NDUFS8	2.94018	0.0145597	0.0431786
SNX3	-2.3326	0.0145882	0.0431786
COQ10B	-2.61697	0.0145764	0.0431786
MTUS1	-2.00939	0.0145662	0.0431786
RPS11	-1.63996	0.0145474	0.0431786
RILPL1	3.18401	0.0145288	0.0431786
GATA3	-2.06086	0.0146517	0.0432947
CRB3	-2.68673	0.0146552	0.0432947
HLA-F	-2.7006	0.0146649	0.0432947
AICDA	3.08865	0.0148336	0.0437553
RAB11B	-2.85485	0.0148663	0.0438145
SEPTIN4	2.44053	0.0149231	0.0439445
MFSD14C	2.52202	0.0149394	0.0439552
CLDND1	-2.66547	0.0149553	0.0439646
WDR45	-2.35184	0.0150745	0.0442774
TSC22D3	-2.36089	0.0151416	0.0444211
DNASE1	3.04194	0.0151491	0.0444211
ITIH5	2.62685	0.0151929	0.0445118
FAM32A	-2.56933	0.0152548	0.0445801
NFKBIZ	-2.24153	0.0152296	0.0445801
C12orf45	3.36435	0.015247	0.0445801
NDUFB1	-2.18068	0.0152845	0.0446292
KRT4	-2.55046	0.0153147	0.0446796
KIAA0930	2.53755	0.0153726	0.0448037
EVI5L	3.18754	0.0153831	0.0448037
SFXN5	2.72456	0.0154028	0.0448235
GNB5	2.96095	0.0154166	0.0448258
IL27RA	2.67648	0.0154505	0.0448492
TLE3	-2.50993	0.0154414	0.0448492
MFSD4B	2.91339	0.0155096	0.0449454
CATSPER2P1	2.64459	0.0155073	0.0449454
SLC2A6	3.18001	0.0156258	0.0452416
TTC9C	3.02143	0.015638	0.0452416
TM4SF1	-2.65881	0.0156927	0.0453621
CCBE1	3.19953	0.0157577	0.045512
UPB1	2.86987	0.0159221	0.0459486
NPEPPS	-1.61938	0.0159531	0.0459996
ZDHHC5	-2.4131	0.0160079	0.0461192
CD226	2.89997	0.016074	0.0461561
KIF5B	-2.26783	0.0160547	0.0461561
ATXN2	2.18295	0.0160648	0.0461561
LOC102723517	3.12435	0.0160585	0.0461561
ARPC4	-2.3261	0.016114	0.0462325
ANKRD11	-2.07118	0.0161709	0.0463573
ARRDC1	-2.36726	0.016218	0.0464181
LOC100287792	2.83706	0.0162189	0.0464181
DOCK6	2.13173	0.0162342	0.0464237
FBXW5	-2.4416	0.0163453	0.0467029
ARL6IP1	-2.19109	0.0163663	0.0467242
ANGPT2	2.79278	0.0164518	0.0468911
DIP2A	2.2543	0.0164437	0.0468911
MED1	3.11911	0.0165287	0.0470716
CRYBG2	-2.50367	0.0165836	0.047189
FDFT1	-2.42842	0.0166642	0.04736
MTCO1P12	-2.67085	0.016671	0.04736
DNAJB6	-2.08045	0.0167743	0.0476141
NUFIP2	-2.24125	0.0168169	0.0476962
CHCHD2	-1.95405	0.0169869	0.0481388
KLK13	-2.49792	0.0170609	0.048309
SMAD3	-2.47826	0.0170802	0.0483241
RSPH14	3.1785	0.0171209	0.0483998
MBOAT2	-2.04888	0.0171377	0.0484076
ABR	2.79287	0.0171569	0.0484226
SYMPK	2.48445	0.0171918	0.0484815
KEAP1	-2.73278	0.0172538	0.0486167
OPTN	-1.85233	0.0173789	0.0489294
ZNF7	3.04354	0.0174322	0.0490395
RPLP1	-1.557	0.0175671	0.0493789
BZW1	-2.56656	0.0175923	0.0494098
SLC44A4	-2.03158	0.0176708	0.0495899
AGR2	-2.80181	0.0177124	0.0496664
LGALS4	3.31135	0.0177297	0.0496748
THAP9-AS1	-2.63046	0.0177582	0.0497143
MAVS	2.06757	0.0179863	0.0503123
LOC101928304	3.00253	0.0180235	0.0503757
CLN5	2.33966	0.0181205	0.0506058
RBMS3	2.73726	0.0181387	0.050616
SMIM22	-1.96957	0.0181658	0.0506508
TIGAR	2.92484	0.0182593	0.0508704
MIR99AHG	2.95139	0.0182761	0.0508764
XRN1	-2.40854	0.0183269	0.0509768
LOC101929420	3.04092	0.0184269	0.0512137
CHD2	-1.98535	0.0185557	0.0515303
USP6NL	-2.1975	0.0186197	0.0516667
AQP3	-2.57523	0.0186992	0.0518459
LOH12CR2	2.84967	0.0187346	0.0519025
IVNS1ABP	-2.6228	0.0187722	0.051965
RAD51D	3.14152	0.0188257	0.0520714
IL1A	-2.93081	0.0188653	0.0521394
MOSPD1	-2.7345	0.01892	0.0522487
MYPN	2.7726	0.0189436	0.0522723
DDHD2	2.61956	0.0191027	0.0526694
PWRN3	2.63657	0.0191755	0.052828
SRD5A3	-2.14572	0.0192079	0.0528751
ITPRIPL2	-1.83322	0.019235	0.0529078
ALOX5AP	-2.83792	0.0192979	0.0530386
C4orf19	-1.84687	0.0194249	0.0532851
LINC02671	2.61038	0.0194491	0.0532851
HCG11	2.74697	0.0194489	0.0532851
SOX2-OT	2.99522	0.0194237	0.0532851
MMAB	2.80529	0.0194773	0.0533201
ACADM	-2.30915	0.0195309	0.0534246
IL13RA1	-2.37219	0.0195597	0.0534335
ADAMTS4	2.9339	0.019565	0.0534335
NDUFB4	-2.38793	0.0196106	0.0534735
ZNF385C	2.69242	0.0195995	0.0534735
KCNJ14	3.13373	0.0196683	0.0535888
RPAIN	2.62143	0.0196892	0.0536036
VAT1	-2.65055	0.0197377	0.0536366
VWCE	2.84469	0.0197204	0.0536366
MIRLET7BHG	3.11637	0.0197478	0.0536366
ADCY2	3.01036	0.0197872	0.0537014
BLCAP	-2.396	0.0200209	0.0542931
TNR	-1.49894	0.0201322	0.0545521
LOC344967	3.03411	0.0201747	0.0546248
PDP2	2.65942	0.0202209	0.0547069
RPL35A	-1.93958	0.0202428	0.0547235
APTX	2.43618	0.0203114	0.0548551
SEZ6L2	2.24113	0.0203232	0.0548551
KANK4	3.05817	0.0203469	0.0548765
IL2RG	-2.49245	0.020369	0.0548933
DBT	2.46931	0.0204161	0.0549773
LINC00954	3.19256	0.0204746	0.0550921
CRTC3	3.26029	0.020534	0.0552092
DSP	-2.36874	0.0205831	0.0552742
SRSF5	-2.25433	0.0206039	0.0552742
CYTH2	-2.1814	0.0206221	0.0552742
CNST	-2.57975	0.0206207	0.0552742
LOC100505585	2.85887	0.0206586	0.0553292
BAZ1A	-2.22697	0.0206944	0.0553824
MPZL3	-2.6215	0.0208263	0.0556923
MOGAT3	3.10021	0.0209016	0.0558506
SMYD4	2.28175	0.0210964	0.0563276
OGG1	2.62338	0.0211159	0.0563363
ATP5MC2	-2.46477	0.0212141	0.0565112
IPO9	2.78989	0.0212055	0.0565112
MYH7B	3.19762	0.0213746	0.0568748
SKIL	-2.35808	0.0213835	0.0568748
ARHGEF10	2.81257	0.0214481	0.0569642
NOTCH4	2.53444	0.021467	0.0569642
ARHGAP8	3.02512	0.0214542	0.0569642
CYP2A6	-2.28006	0.0214829	0.0569642
HIPK1-AS1	2.98842	0.0215109	0.0569949
GALNT6	2.88192	0.0215665	0.0570985
ARSG	2.95194	0.021795	0.0576594
C6orf62	-2.45313	0.0221344	0.0585126
DHCR24	-2.61196	0.0223584	0.0590596
SLC45A4	-2.57996	0.0224362	0.0591015
ACSS3	2.76216	0.0224425	0.0591015
DNAL1	2.68985	0.0224158	0.0591015
NECTIN2	-1.99983	0.0224159	0.0591015
TTN	2.22204	0.0226696	0.0596541
ATRX	-2.25797	0.022857	0.0600778
RPL26	-2.01867	0.0228653	0.0600778
PRKN	2.648	0.0229429	0.0602359
GBA2	2.85363	0.0230588	0.0604944
WAKMAR2	2.58711	0.0233418	0.0611905
UNC13D	2.76803	0.023418	0.0613438
CES2	2.70027	0.023688	0.0620043
EMC6	-2.77718	0.0237998	0.0622223
RAB5A	-2.22875	0.0238252	0.0622223
LOC100507283	2.86537	0.0238219	0.0622223
FAT3	2.72943	0.0239242	0.0624336
UPF1	-2.18452	0.0240849	0.0628058
POLR1B	2.98675	0.0241166	0.0628411
GAK	-1.73975	0.024156	0.0628964
PI4K2A	-2.47397	0.0242563	0.0630712
BCL9L	-2.31079	0.0242596	0.0630712
LST1	-2.79321	0.0243011	0.0631318
RHOB	-2.48822	0.024406	0.0632297
CYP4F11	-2.76494	0.0244108	0.0632297
LOC153684	3.10169	0.0243669	0.0632297
MGC16275	2.65133	0.0244118	0.0632297
AKAP8	2.78226	0.0245116	0.0634407
HOMER2	2.90677	0.0245402	0.0634672
ANKRD44	2.59925	0.0245866	0.0635398
NELFCD	2.60049	0.0246442	0.0636249
ZMAT2	-2.47354	0.0246563	0.0636249
NELFE	-2.63282	0.0246748	0.0636253
PTPN7	2.66953	0.0247161	0.0636843
BICDL2	-1.88868	0.0247788	0.0637985
SLC25A23	-1.97175	0.0248734	0.063945
UACA	-2.11682	0.0248911	0.063945
NUGGC	2.93667	0.0248737	0.063945
PHLDB1	2.80254	0.0250679	0.0641611
POLM	2.65455	0.0250033	0.0641611
STAU1	-2.72634	0.0250433	0.0641611
KLHL21	-2.51024	0.0250652	0.0641611
OR10H5	2.96871	0.0250237	0.0641611
TRIM65	3.04579	0.0251394	0.0642493
PCBP1-AS1	2.69254	0.0251391	0.0642493
DST	2.38771	0.0251942	0.0643418
GSN	-2.2534	0.0252241	0.0643708
HECTD1	-1.76109	0.0253888	0.0647434
KLHL8	2.91338	0.0254638	0.0648868
NPC2	-2.06938	0.0255081	0.0649519
MLF2	-2.42148	0.0257006	0.0653939
ZFHX4	2.69459	0.025915	0.065891
CDKN2AIP	-2.70762	0.0260893	0.0662855
TUBGCP2	2.40382	0.0262004	0.0664745
CANT1	-2.13195	0.0262021	0.0664745
GK5	2.62184	0.0263106	0.066701
MEF2D	-2.41471	0.0264242	0.0668911
ST3GAL3	3.04674	0.0264083	0.0668911
XPO1	-1.87977	0.0265048	0.0669483
MED25	-2.41038	0.0265026	0.0669483
DNAH2	2.46428	0.0264925	0.0669483
CNDP2	-1.78364	0.0265247	0.0669498
TMEM41B	-2.37003	0.0265797	0.0670397
GFI1B	2.61479	0.0266315	0.0671002
DDB1	2.45896	0.0266425	0.0671002
RGR	2.94516	0.0267129	0.0672288
CCDC30	2.57014	0.0267552	0.0672375
CCDC157	3.0352	0.026743	0.0672375
PHF23	-2.46859	0.026782	0.0672559
MAP3K3	2.94873	0.0268921	0.0674835
FSD2	2.28295	0.0270204	0.0677564
ARHGDIA	-2.00143	0.0271824	0.0680751
ESCO2	2.69959	0.0271911	0.0680751
UBE2L3	-2.58807	0.0272065	0.0680751
MKRN1	-2.12774	0.0272972	0.0681545
RAC1	-1.75161	0.0272788	0.0681545
ZNF26	2.2548	0.0272847	0.0681545
GCAT	2.87701	0.0273716	0.0681901
HP1BP3	-1.95376	0.0273823	0.0681901
PAAF1	2.62428	0.0273902	0.0681901
FBXO34	-2.38646	0.0273322	0.0681901
KATNBL1	-1.88808	0.0274911	0.0683921
LINC02395	2.81089	0.027605	0.0686262
NOS1	2.6016	0.0277863	0.0687447
ITPRID2	-2.37273	0.027739	0.0687447
HTR3B	2.84994	0.027754	0.0687447
SLC37A3	2.5828	0.0277286	0.0687447
RELL1	-2.36239	0.0276954	0.0687447
EWSR1	-2.12513	0.0277784	0.0687447
HAND2-AS1	2.94843	0.0277917	0.0687447
CSNK1D	-1.83038	0.0278278	0.0687848
ITPRIP	-2.08978	0.0279403	0.0689646
ZNF600	2.82881	0.0279227	0.0689646
DPF2	2.62263	0.0279663	0.0689797
AVIL	2.85418	0.0280439	0.0691216
HIVEP2	-2.59481	0.0280818	0.069166
CAPN12	2.31873	0.0282021	0.0694128
NMT2	2.73555	0.0282924	0.0695856
ZNF500	2.62	0.0283355	0.0696421
SLC22A14	2.81656	0.0283778	0.0696967
SETD5	2.58683	0.0285421	0.0700506
SUPT6H	2.30432	0.0285893	0.0700821
PLK3	-1.83823	0.0286151	0.0700821
DDI2	2.47642	0.0286157	0.0700821
NPFFR1	3.10063	0.0286829	0.0701972
ETS2	-2.56659	0.0287426	0.0702924
LINC02728	2.7772	0.0287624	0.0702924
UBE2W	-2.37994	0.0288069	0.0703515
FLRT2	2.28412	0.0288881	0.0704999
AACS	2.49381	0.0291048	0.0709788
SH3BP5L	-2.46272	0.0291357	0.0710041
YY1	-1.71144	0.0292746	0.0712425
SLC25A26	2.14137	0.0292611	0.0712425
GPATCH2L	2.44844	0.0293963	0.0714883
PRKAR1A	-2.40723	0.0296178	0.0719765
FLJ40194	2.26213	0.0296566	0.0720202
SERINC1	-2.82798	0.0297447	0.0721834
BTG1	-2.05101	0.0297905	0.072244
ALDH3B1	2.57097	0.0298891	0.0724323
ACAD10	2.9227	0.0301348	0.0729768
NEK5	2.87447	0.0302062	0.0730985
WDR19	2.6129	0.0302355	0.0731184
CEP250	2.84346	0.0303187	0.0732684
LONP2	2.95221	0.0306451	0.0740055
RER1	-2.80976	0.0308713	0.0744659
USP38	-2.32581	0.0308787	0.0744659
GRIK1-AS2	-2.60407	0.0309507	0.0745875
ITGA11	2.82585	0.0310173	0.0746961
TECR	2.87451	0.0310616	0.0746989
NFAT5	2.21571	0.0310438	0.0746989
OR3A3	3.09243	0.0310944	0.0747259
LOC100505774	2.63781	0.0311513	0.0748107
TSKU	-2.58962	0.0311812	0.0748305
TINAGL1	-2.44472	0.0313103	0.0750884
ADNP	-2.57665	0.0313704	0.0751284
CLPB	2.71003	0.0313506	0.0751284
ZNF714	3.01998	0.0314005	0.0751486
RBM6	2.71047	0.0315067	0.0753108
LARP4B	-2.08101	0.0315181	0.0753108
CCDC170	2.82962	0.0315522	0.0753108
NT5C3A	-1.86945	0.0315553	0.0753108
LMO2	-2.42749	0.0316867	0.0754164
MDM2	-1.70125	0.031677	0.0754164
SCRG1	2.56581	0.0316814	0.0754164
KRT14	2.86846	0.0316829	0.0754164
CFAP298	2.82577	0.0319502	0.0759915
ZNF583	2.84544	0.0320031	0.0760649
SLU7	-2.24773	0.0320674	0.0761656
ASB15	2.70575	0.0320898	0.0761666
DDX10	2.93334	0.03223	0.0764469
AKIRIN2	-2.42735	0.0323745	0.0767371
MTMR3	-1.99805	0.0325202	0.0770296
ZIM2-AS1	2.51694	0.0326087	0.0771865
RTF2	-2.28231	0.0326721	0.0772837
UNC45A	2.73688	0.0327094	0.0773192
SUMO3	-2.41735	0.0327712	0.0774124
UMODL1	3.04311	0.0327947	0.0774152
HHAT	2.8709	0.0329083	0.0775775
CCDC88A	2.12551	0.0329052	0.0775775
AP2M1	-2.33645	0.0330236	0.0777965
SLC9A3R2	-2.54849	0.0331481	0.0780367
TJP1	-1.99954	0.0332685	0.0782669
ZBTB7A	-2.03308	0.0333408	0.0783305
CLLU1	2.77028	0.0333389	0.0783305
ACAA1	-2.16205	0.0334124	0.0783393
LSR	-2.17131	0.0334088	0.0783393
DUSP18	3.00678	0.0333919	0.0783393
ENPP1	2.82053	0.0334922	0.0784732
FBXL2	2.39791	0.0335215	0.0784889
CSNK2B	-2.23123	0.0336538	0.0787452
CCP110	2.5291	0.0337056	0.0787601
GPX3	-1.66838	0.033683	0.0787601
SH3TC1	-2.42814	0.0337846	0.0788916
C15orf39	-2.15146	0.0338767	0.0790001
LOC105369760	2.84012	0.0338552	0.0790001
ZNF556	2.63422	0.033916	0.0790385
HINFP	2.85874	0.0339676	0.0791055
TANGO6	2.54074	0.034158	0.0794503
KLK7	-2.43326	0.0341616	0.0794503
ENPP4	-2.49754	0.0342205	0.0795339
PCAT1	2.41475	0.0342732	0.079603
RALB	-2.28214	0.0343129	0.0796348
GPX4	-2.41801	0.0343329	0.0796348
ZBTB16	2.37959	0.0343676	0.0796619
RBM26	2.75176	0.0344354	0.0797658
SNCA	2.62829	0.0346263	0.0801542
LRIG2	2.48091	0.0347885	0.0804761
ZNF283	2.82488	0.0349145	0.0807136
SSU72	-1.87558	0.0350765	0.080926
PROSER3	2.68529	0.0350749	0.080926
LOC171391	2.68435	0.0350701	0.080926
RASEF	-2.21469	0.0353534	0.0815104
SLC25A42	2.61757	0.0353845	0.0815279
PIGM	2.59158	0.0354871	0.08171
PRDX1	-1.99135	0.035849	0.0824336
NDUFA3	-2.25316	0.0358318	0.0824336
PLEKHS1	2.61248	0.0358983	0.0824376
CCL5	2.99744	0.035895	0.0824376
BRCA1	2.8789	0.0359488	0.0824989
ST3GAL4	-2.75599	0.0359785	0.0825122
LOC105370500	2.6839	0.0361	0.0827361
WIPI1	2.44587	0.0362959	0.08313
LOC101928940	2.87617	0.0369825	0.0846467
BROX	-2.32534	0.0370932	0.084844
HNF1A-AS1	2.34654	0.0371494	0.0849164
PDGFRB	2.66013	0.0373212	0.0851966
PSMB3	-2.23805	0.0373116	0.0851966
FURIN	-2.74925	0.0373487	0.0852032
MEA1	-2.39617	0.0374567	0.0853372
RPL23	-1.35744	0.0374335	0.0853372
SLC4A1	2.42004	0.0375478	0.0854885
LRRC74B	2.94913	0.0375835	0.0855135
BTF3	-2.31592	0.0377461	0.0857708
SLC35G3	2.78503	0.0377453	0.0857708
SNRK	-1.51339	0.0378894	0.08604
GTF2H3	2.44334	0.0379896	0.0861546
DOCK4	2.58626	0.0379895	0.0861546
REXO5	2.60825	0.0382547	0.0866586
CASC4	2.97469	0.0382619	0.0866586
FAM3B	-2.14322	0.0384109	0.0869393
WDR62	2.86359	0.0385828	0.0871006
TP53BP2	-2.46021	0.0385826	0.0871006
GRM1	2.77943	0.038515	0.0871006
OLMALINC	1.99137	0.0385421	0.0871006
KRI1	2.99858	0.0386614	0.0871643
ONECUT3	2.62748	0.0386575	0.0871643
RBFOX1	2.2139	0.0387321	0.087246
ERRFI1	-2.47286	0.0387621	0.087246
TCHP	-2.02879	0.0387732	0.087246
FAM43A	2.66596	0.0389288	0.0875392
ABHD17C	-2.6218	0.0389843	0.0875502
LINC00271	2.75439	0.0389835	0.0875502
ZNF844	2.26712	0.0392828	0.0881634
PYROXD2	2.47106	0.0394256	0.0884268
TMEM213	2.67542	0.0395878	0.0887329
MAP4	2.51709	0.0396394	0.0887343
GTPBP2	-2.34157	0.0396396	0.0887343
PHC2	-2.26476	0.0397059	0.0888252
EEF1A1	-1.39969	0.0399938	0.0894115
MKNK1	2.21185	0.0400475	0.0894619
LOC105374988	2.76829	0.040068	0.0894619
XPNPEP3	2.33367	0.0401805	0.0896554
TRAM1	-1.72864	0.0402283	0.0897043
MANSC1	2.72653	0.0404481	0.0900784
ZNF706	-2.43658	0.0404469	0.0900784
LINC01405	2.71805	0.0407653	0.0907263
MSI2	2.3593	0.0408391	0.0908322
DENND5B	2.28101	0.0409343	0.0909699
LINC01198	2.76259	0.0409535	0.0909699
UBE2D2	-2.27209	0.0410343	0.0910414
LINC00174	2.73296	0.0410383	0.0910414
CCN5	2.49901	0.041152	0.0912351
CCDC77	2.39655	0.0413092	0.0915252
SULT1A1	4.32741	0.0413607	0.0915806
GALE	-1.9727	0.0415571	0.0919568
RPS27	-1.31533	0.0416815	0.0921731
FRMD4B	2.03682	0.0417829	0.0923383
LYRM2	2.51301	0.0420551	0.0928806
GNE	-2.0244	0.042263	0.0932802
EIF2S2	-2.24732	0.0423205	0.0932882
FANCA	2.42224	0.0423098	0.0932882
ANKS1B	2.50241	0.0425173	0.0936625
SPHK2	2.12537	0.0426085	0.0938037
TAB3	-2.08779	0.0427704	0.0941004
POLR2F	1.63938	0.0428167	0.0941423
MARCHF7	-2.04594	0.042967	0.0944129
OR7C1	2.30372	0.0430774	0.0944757
SFTA3	2.63909	0.0430378	0.0944757
CNOT2-DT	2.88544	0.0430751	0.0944757
TAF10	-2.22428	0.0431468	0.0945679
PATZ1	-2.04921	0.0432682	0.0947142
RSRP1	-1.92982	0.0432569	0.0947142
FGF22	2.86093	0.0433376	0.0948061
KIF3B	2.89407	0.0434193	0.094865
TSR1	2.56991	0.0434065	0.094865
LINC02071	2.43857	0.043675	0.0953636
SARNP	2.7697	0.0438321	0.0956463
ZNF429	2.46312	0.0439027	0.09574
FBXL18	2.22796	0.044132	0.0961795
BASP1-AS1	1.87662	0.0442582	0.0963938
ATP5F1B	-2.35368	0.0443074	0.0964403
UTP20	2.67647	0.0445809	0.0969747
LOC105373958	2.98168	0.0446601	0.0970859
ARNTL2	-2.12104	0.0448408	0.0971248
PKP2	2.93073	0.0448761	0.0971248
SCP2	-1.88114	0.0448234	0.0971248
FEM1A	1.92416	0.0449023	0.0971248
PRPSAP1	2.26423	0.0448673	0.0971248
ZNF75A	2.4491	0.0448998	0.0971248
ABHD18	2.38406	0.0448369	0.0971248
L3MBTL1	2.90592	0.0448197	0.0971248
PPARD	-2.27197	0.0449902	0.0972542
VWA2	2.79343	0.0451223	0.0974788
NQO2	2.36161	0.0453213	0.0977892
TRNP1	-2.23163	0.0453225	0.0977892
LOC105377590	2.92257	0.0454746	0.0980563
SRRM2	-1.86614	0.0455155	0.0980834
POLR2K	-2.40561	0.0455923	0.0981879
PPM1N	2.67732	0.0460011	0.0990066
ATF6B	2.44059	0.0460421	0.0990335
LINC00908	2.85953	0.0461218	0.0991433
TMBIM6	-1.41406	0.0462678	0.0993954
AIF1	-2.54661	0.0463748	0.0995635
HMGB1	-1.6692	0.0464118	0.0995813
PARP9	-1.94438	0.0465835	0.0998877
LOC339803	2.82071	0.0467041	0.100084
ADGRE2	2.24607	0.046817	0.100264
TMEM106B	-1.84347	0.0468948	0.100369
ISG20L2	2.46687	0.0470499	0.10062
SPINT2	-1.64358	0.0470701	0.10062
PTPN14	2.52361	0.0471534	0.100673
RAB3B	2.65959	0.0471451	0.100673
CPB2-AS1	2.48096	0.0472816	0.100885
PCNX4	2.1126	0.0475474	0.101327
PPA1	-1.77873	0.0475379	0.101327
MAGI2	2.33286	0.0478753	0.101963
LINC01697	2.42454	0.0479059	0.101966
ATG9B	-1.92749	0.0480653	0.102179
KREMEN1	2.23284	0.0480585	0.102179
NR2F2-AS1	2.16358	0.0482405	0.102489
FGD2	2.50072	0.0484288	0.102733
SLC15A2	-1.94959	0.0484011	0.102733
LOC101927151	2.83294	0.0484442	0.102733
BRSK1	2.91609	0.0486799	0.103106
ATP5MG	-1.81383	0.0486777	0.103106
PRR11	2.77635	0.0487356	0.103161
UEVLD	2.43802	0.048995	0.103647
LINC01317	2.65315	0.0490347	0.103667
TMEM165	-2.02896	0.0491251	0.103732
KIF5C	2.22169	0.0491203	0.103732
ITGA9-AS1	3.84403	0.0492577	0.103949
CCDC144A	2.50137	0.0494983	0.104393
CYB5R3	-1.93576	0.0496723	0.104505
NUBP1	2.67705	0.0496299	0.104505
USP53	-1.76556	0.0496059	0.104505
TRIM16	-2.38027	0.0496422	0.104505
LINC01833	2.72619	0.0497045	0.104509
PSMD7	-2.02013	0.0497642	0.104571
ZNF268	2.25252	0.049818	0.10459
NDUFA2	-1.76637	0.0498336	0.10459
TMEM38A	2.546	0.0499842	0.104669
RGS12	2.51771	0.0500244	0.104669
SGCD	2.35927	0.0499976	0.104669
DLEU7-AS1	2.68249	0.0500523	0.104669
C21orf62	2.32307	0.0499677	0.104669
FAM66C	2.91348	0.0500044	0.104669
TACC1	-1.41248	0.0501806	0.10483
NMNAT1	2.49026	0.05019	0.10483
ESRP1	-2.18738	0.0503565	0.105051
ZEB1	2.81941	0.0503306	0.105051
NTN4	-1.7876	0.0505443	0.105149
EIF5B	-1.93257	0.050517	0.105149
RBFOX3	2.37811	0.0504597	0.105149
LTBP3	2.02511	0.0505551	0.105149
LRCH3	2.54747	0.0504824	0.105149
CCNC	-2.30894	0.0506304	0.105171
CSNK1G2	-2.26795	0.050604	0.105171
CMPK1	-1.85694	0.0506569	0.105171
SDHAP2	1.52927	0.0508099	0.105425
ATP10A	2.47636	0.0508416	0.105428
FNBP1L	-2.27544	0.05102	0.105734
MYCBPAP	2.82149	0.0515643	0.106798
GALNT10	2.51215	0.0516038	0.106817
ELK3	-2.03118	0.0517557	0.106939
SSTR2	2.18682	0.0517056	0.106939
KNTC1	2.40918	0.0517487	0.106939
P3H1	2.63389	0.0519522	0.10728
SRSF6	-2.28185	0.0519825	0.10728
NBDY	-1.95863	0.0521047	0.107468
PDLIM2	2.28578	0.0521506	0.107498
PSMA6	2.78304	0.052326	0.107747
CCDC142	2.81539	0.0523645	0.107747
ESR2	2.43283	0.0523545	0.107747
SRSF11	-1.94259	0.0525477	0.108022
ACAN	2.61189	0.0525607	0.108022
EMC2	-2.02277	0.0526202	0.108067
CNPPD1	-2.14592	0.0526451	0.108067
NSL1	2.26054	0.0527615	0.108223
ZNF276	2.85548	0.0527917	0.108223
LINC00299	2.14763	0.0528145	0.108223
RNPEP	-2.39956	0.0528636	0.108259
TGM4	2.86386	0.0529631	0.108399
SRARP	2.70942	0.0530165	0.108444
WTIP	2.62428	0.053091	0.108532
CHMP2B	-1.78607	0.0531912	0.108608
CSF3R	-1.73126	0.0532222	0.108608
METTL2B	2.45605	0.0531665	0.108608
ATP8B2	2.53498	0.0532566	0.108615
DCXR	-2.32759	0.0534625	0.10897
STAU2	-2.14147	0.0536297	0.109176
PTDSS1	2.26719	0.0536456	0.109176
CDS1	-1.98123	0.0536893	0.109176
LRRC3B	2.65957	0.0536793	0.109176
VGLL4	-2.03083	0.0538145	0.109366
SSR3	-2.01431	0.054075	0.109767
PINK1	-2.09468	0.0540608	0.109767
WDR45B	-1.79831	0.0541179	0.109789
ASCC1	2.43042	0.0542774	0.109984
MARCHF9	2.35129	0.0542611	0.109984
SLC2A13	2.77967	0.0543509	0.110068
ZNF555	-2.51616	0.0544722	0.11025
MIPOL1	2.30418	0.0545234	0.110289
DNAJC24	2.33045	0.0547015	0.110585
HIF1A	-1.39849	0.0547477	0.110613
PAQR7	-2.33604	0.0549109	0.110814
HEXIM1	-1.9157	0.0548818	0.110814
DRAXIN	2.76344	0.055035	0.110935
SIPA1	-2.24921	0.055029	0.110935
MAPK1IP1L	-1.77385	0.0551758	0.111089
ARHGEF12	1.42416	0.0551564	0.111089
MYH11	2.72657	0.0552228	0.11112
PFDN5	-1.62135	0.0552965	0.111203
OASL	-1.95492	0.0554106	0.111328
GHITM	-2.69716	0.0554551	0.111328
STX18-AS1	2.14685	0.0554491	0.111328
SMIM8	2.03721	0.055518	0.11139
LINC01205	2.68097	0.0556207	0.111531
G0S2	-1.89483	0.056166	0.112559
CFAP74	2.30641	0.0564145	0.112927
STARD10	2.32747	0.0563969	0.112927
RFX2	2.59678	0.0565749	0.113117
HNRNPH1	-2.03126	0.0565705	0.113117
PRKCH	-1.82889	0.0567068	0.113165
TIMM50	2.71983	0.0566967	0.113165
SERINC3	-1.98623	0.0566972	0.113165
ATP8	1.03788	0.0567297	0.113165
EMX2OS	2.52734	0.0568857	0.113411
CIAO1	2.26388	0.0571982	0.113938
INSIG1	-1.97379	0.0572156	0.113938
GCLM	2.06731	0.0574904	0.11438
TNFAIP8L1	1.95397	0.0575038	0.11438
PLCD3	-2.37744	0.0576627	0.11463
DNAH7	2.32123	0.0578149	0.114867
PCM1	1.66802	0.0583135	0.115582
KIAA1549	2.35985	0.0583217	0.115582
ARFIP2	2.4446	0.0582675	0.115582
NDUFV2	-2.22875	0.0583419	0.115582
ZNF528-AS1	2.74301	0.0582544	0.115582
CENPBD1P1	2.79323	0.0585761	0.11598
ENO4	2.46359	0.0587094	0.116111
LINC01625	2.38113	0.0586803	0.116111
AP1M1	2.28896	0.0587578	0.116141
CERT1	-1.66198	0.0591168	0.11665
ARL8A	-2.05046	0.0590834	0.11665
ROBO4	2.39774	0.0590839	0.11665
COX18	2.40377	0.0591677	0.116684
CCDC57	2.17516	0.059369	0.116948
ZNF605	2.24736	0.0593584	0.116948
NUCB2	2.23158	0.0597306	0.117527
NPC1	-1.90455	0.0597072	0.117527
ELOC	-1.64849	0.0600922	0.118171
JPX	1.97909	0.0601767	0.11827
ITCH	-1.43123	0.0605991	0.119029
DNAAF5	2.33054	0.0606891	0.119029
MZT2A	2.443	0.0606594	0.119029
LINC01132	2.32555	0.0607002	0.119029
H2BC8	-1.87652	0.0608869	0.119327
TMC5	-1.74322	0.0610541	0.119587
SCN3A	2.17806	0.0614481	0.120291
FLVCR1-DT	3.48605	0.0616271	0.120573
CRIPT	-1.97603	0.0616784	0.120605
DLG1	2.08643	0.0618329	0.120713
NOSIP	1.99149	0.0617897	0.120713
SURF4	-2.43405	0.0619273	0.120713
CDCP1	-1.83626	0.0618957	0.120713
GDNF	2.40094	0.0619428	0.120713
OAZ2	2.05894	0.0618952	0.120713
ADRM1	-2.32303	0.0619813	0.120721
APOE	2.65398	0.0620804	0.1208
PTPRT	2.17357	0.0621267	0.1208
SULT1C4	2.37218	0.0621128	0.1208
AK3	-1.65375	0.0623879	0.121172
TGIF1	-2.10018	0.0623614	0.121172
YWHAQ	-2.11817	0.0625858	0.121488
YARS1	2.25809	0.062689	0.121552
PCAT2	2.72741	0.0626675	0.121552
PFKL	-2.11513	0.0627369	0.121577
FADS1	2.69677	0.0628867	0.121799
ST6GALNAC6	2.56857	0.0630456	0.122013
COA5	-2.23731	0.0630678	0.122013
CTDSP1	-2.19861	0.0634228	0.122632
HILPDA	-1.78049	0.0635231	0.122757
ENO1	-1.55028	0.063773	0.123171
STK38L	-1.89523	0.0639956	0.123532
BNIP3L	-2.06895	0.0641013	0.123605
GRM4	2.21779	0.0641046	0.123605
CAMK1D	2.42313	0.0641409	0.123606
DYNLL1	-1.62994	0.0642573	0.123761
NFASC	2.48657	0.064431	0.124027
RPS14	-1.56775	0.0645636	0.124213
PABPC1L	2.16947	0.0649937	0.124971
ADAP2	2.17576	0.06508	0.125068
KDM2B	2.06735	0.0652963	0.125414
TCF4	1.80449	0.0655606	0.125852
TAGLN2	-1.80778	0.0656739	0.125999
EIF5	-1.90068	0.0658847	0.126334
GOLM1	-2.21884	0.0659433	0.126376
RHOT1	-1.64982	0.066065	0.126469
LINC02078	2.18315	0.0660331	0.126469
CALR	-1.81638	0.0661652	0.126591
FCMR	2.52936	0.066228	0.126641
C1orf43	-1.70989	0.0662854	0.126681
FUCA1	-1.87668	0.0663596	0.126683
FER1L5	2.09327	0.0663434	0.126683
DNAH10	2.23461	0.0664275	0.126743
MYO3B	2.15412	0.0664759	0.126765
PRKCZ	-2.33396	0.0665182	0.126776
ANXA13	2.42938	0.0668387	0.127317
COTL1	-1.90949	0.0672795	0.128086
CNP	-1.913	0.0673621	0.128173
ZSCAN5A	2.52256	0.0675218	0.128406
TSPAN10	2.07036	0.0678096	0.128838
LOC107984784	2.52348	0.0678232	0.128838
GSKIP	-2.07581	0.0679819	0.128876
GON4L	2.36526	0.0680264	0.128876
RAB3GAP2	1.7878	0.0680666	0.128876
PML	-1.69343	0.0679544	0.128876
ARRDC5	2.17749	0.0680665	0.128876
LOC107984525	2.63954	0.0679127	0.128876
NXPE3	2.6876	0.0683409	0.129325
PLIN5	1.95281	0.068511	0.129576
DAPK2	2.12373	0.0685989	0.129656
MYO16	2.30513	0.0687641	0.129656
SHF	1.94974	0.0687568	0.129656
TMEM108	2.29307	0.068667	0.129656
CAMK2N1	-1.91271	0.0686762	0.129656
MLLT3	2.07855	0.0687781	0.129656
OPRM1	2.02206	0.0688234	0.129671
TAB2	-1.95094	0.0689194	0.129711
JOSD1	-1.82301	0.0688995	0.129711
UBE2Q1	-2.20398	0.0690002	0.129734
MAGI2-AS3	2.41762	0.0690068	0.129734
RIPOR2	1.98614	0.0691706	0.129831
ARL10	2.28892	0.0691548	0.129831
ZNF316	2.31205	0.0691026	0.129831
NBR1	-1.39219	0.0692388	0.129888
MRPS18B	2.35266	0.0693881	0.130098
CMC2	2.08218	0.0696592	0.130536
EIF1AX	-1.77551	0.0698453	0.130813
OAS2	-2.0801	0.0701839	0.131377
PLA2G6	2.10567	0.070323	0.131566
PAXIP1	2.41938	0.0704591	0.131749
ATP6	0.296818	0.070523	0.131798
DOP1B	1.82567	0.0705828	0.131838
NOC2L	3.58049	0.0706822	0.131953
CORO1B	-1.93847	0.0710583	0.132584
ETF1	-1.81359	0.0711826	0.132744
L2HGDH	2.49228	0.0712251	0.132752
CTCF	1.8815	0.0713204	0.132858
SGK2	2.647	0.0714149	0.132962
MORC2-AS1	1.91978	0.0715073	0.133063
ITGAM	2.09104	0.0715934	0.133144
MKLN1-AS	1.97077	0.0716278	0.133144
SPOP	2.26564	0.071728	0.133259
KCNC1	2.52064	0.0718014	0.133323
MEX3A	2.24194	0.0722241	0.134037
FBN3	2.02066	0.0724563	0.134395
SCN11A	2.21609	0.0728325	0.135021
NOSTRIN	2.42447	0.0732122	0.135652
CEP152	2.39599	0.0733544	0.135843
NEIL1	2.15189	0.0736223	0.136266
HNRNPA1	-1.97387	0.0737487	0.136427
KMT2A	2.03956	0.0739516	0.136729
FBLIM1	2.19762	0.0741322	0.13699
VPS28	-1.7319	0.0743025	0.137232
FLJ31104	3.47991	0.0745415	0.1376
RPL35	-1.4417	0.074825	0.138032
PTGIR	2.10368	0.0748552	0.138032
SNRPA1	2.17724	0.0750252	0.13824
POGZ	2.30774	0.0750482	0.13824
MYLK	2.00713	0.0754894	0.138832
CPA4	-2.46514	0.0754271	0.138832
MTMR12	-2.04563	0.0754546	0.138832
RPS24	-1.48044	0.0756947	0.139135
BSG	-2.17215	0.0760662	0.139744
SEC14L4	2.0539	0.0762589	0.140024
AP2S1	-1.86108	0.076452	0.140304
LINC002481	3.61836	0.0765188	0.140352
OXSR1	-1.95335	0.0767902	0.140775
ASAH1	-1.22252	0.0768797	0.140863
CC2D1A	2.2281	0.0769191	0.140863
OGA	-1.29125	0.0770068	0.140949
MTO1	2.41364	0.0770634	0.140977
NR1H2	-1.88236	0.0774076	0.141533
NME1	3.34266	0.0780243	0.142585
LIAS	2.37297	0.0781285	0.142625
ATP5IF1	-1.69714	0.0780874	0.142625
ZNF426	-1.52529	0.0782555	0.142781
LINC01562	2.11314	0.0783156	0.142816
LAPTM5	-1.71676	0.0784328	0.142954
TLL1	2.52239	0.0788027	0.143553
SEM1	-1.69748	0.0788715	0.143603
LOC101927741	2.49184	0.0791262	0.143991
RALGAPA1	2.24242	0.0791906	0.144032
ZNF620	2.5968	0.0796493	0.14479
MCUR1	1.81825	0.0799768	0.145295
MPHOSPH9	2.54778	0.0800106	0.145295
IL1B	-2.69041	0.0800877	0.145358
RBM3	-1.53674	0.0802761	0.145472
EXOG	2.21178	0.0802196	0.145472
LOC101929295	2.35697	0.0802521	0.145472
COX7C	-1.43048	0.080419	0.145654
ZNF573	2.4447	0.080513	0.145748
ITGA3	2.00345	0.0807566	0.146009
PRKAR2A	2.19377	0.0807833	0.146009
FAM241A	2.28622	0.080748	0.146009
P2RX4	2.43768	0.0809301	0.146198
KLHL7	2.14374	0.0812346	0.146671
ATP9B	2.29355	0.0813375	0.146781
ARID1B	1.4684	0.0816453	0.147183
SCN1A	2.16283	0.0816216	0.147183
RNF165	2.39981	0.0819892	0.147726
TSPAN13	-2.07782	0.0822034	0.148035
COX5B	-1.39866	0.0824099	0.148329
USP15	-1.64311	0.0829335	0.149194
RPL37A	-1.49935	0.0830337	0.149297
MINDY2	1.88167	0.0831842	0.14949
MNDA	-2.54906	0.0833929	0.149787
PPARA	1.82799	0.0837268	0.150309
RINL	1.89797	0.0842249	0.151125
HOOK2	1.87163	0.0844082	0.151219
DNMT3A	-1.8205	0.0844037	0.151219
NPTX1	2.12485	0.0843536	0.151219
RPS12	-1.22283	0.0846364	0.151549
RNF10	-1.55831	0.0848244	0.15165
ZNF655	-1.82817	0.0848238	0.15165
ITSN2	-2.02446	0.0847964	0.15165
MIAT	2.4198	0.0849791	0.151849
PDCD4	-1.73071	0.0851944	0.152076
ENDOV	2.20533	0.0851705	0.152076
GMEB1	2.06999	0.0859637	0.153371
LINC00562	2.35932	0.0860781	0.153432
GTF2H5	2.40124	0.0860868	0.153432
TRIM8	-1.28135	0.0861851	0.153528
HCG18	1.83594	0.0865005	0.154011
ZNF554	-1.53327	0.0865972	0.154104
COG1	2.42433	0.0867997	0.154385
SPP1	1.6017	0.0869528	0.154578
FZD3	2.2009	0.0870809	0.154726
PODNL1	2.15279	0.0871705	0.154806
NGDN	2.29093	0.0873841	0.155004
DNAJC7	1.7543	0.0874162	0.155004
NCOR2	-1.74023	0.0873812	0.155004
HCG22	-2.20253	0.0877031	0.155433
FMN2	2.23066	0.0878777	0.155663
CHMP5	-1.89249	0.0881098	0.155994
SYP	2.0619	0.0882746	0.156046
RASAL1	-1.83617	0.0882604	0.156046
JMY	-1.67661	0.0882746	0.156046
TSC22D1	-2.02712	0.0885521	0.156457
NME6	2.35711	0.0886427	0.156537
VAPB	-1.95535	0.0888299	0.156788
SLC6A20	2.4308	0.0889228	0.156872
CUX2	2.41589	0.089327	0.157381
PILRB	2.18906	0.0893387	0.157381
ZNF212	-1.72243	0.0894296	0.157381
TMEM51-AS1	2.3822	0.0893599	0.157381
GRB2	-1.29139	0.0894384	0.157381
YIPF3	-1.64224	0.0896467	0.157667
MAGI1	1.83783	0.0897243	0.157723
HNRNPA2B1	-1.49602	0.089876	0.157746
YME1L1	-1.51613	0.0899194	0.157746
HECTD4	1.69095	0.0898494	0.157746
CYFIP1	-1.81888	0.0898415	0.157746
ST13	-1.59148	0.0899945	0.157798
PRR27	2.38655	0.0901999	0.158078
RSRC2	-1.38198	0.0903739	0.158286
ASB8	1.70596	0.0904097	0.158286
RPL8	-1.17253	0.0906763	0.158672
ABCA1	-1.56741	0.0909853	0.159132
FADS6	2.22705	0.091096	0.159246
PLPBP	2.08435	0.0915198	0.159906
ZNF200	1.95167	0.0916124	0.159932
SEMA3B	2.09892	0.091627	0.159932
FKBP8	-1.91121	0.0919291	0.160378
AUTS2	2.06199	0.0920999	0.160595
SYT1	1.99174	0.0922368	0.160753
PPP1R3B	-2.05158	0.0922869	0.160759
CRX	2.13612	0.0926502	0.161155
RHOH	1.89764	0.0925954	0.161155
LOC101929439	2.43646	0.0926534	0.161155
CORO7	2.12434	0.0928143	0.161353
BCL2A1	-3.04763	0.0929139	0.161446
ZNF280B	2.28698	0.0931031	0.161693
PGPEP1	1.89297	0.0932452	0.161858
BRPF1	2.20654	0.0932918	0.161858
ZSWIM4	-1.44375	0.0939537	0.162925
LGALS9	-2.15641	0.0941624	0.163205
[truncated: 5,912 more rows]

## Sheet: Table S3
Supplementary Table S3: All differential genes in each cell population from DKD kidney scRNA sequencing data
B cell	NEUT cell	CD cell	DT cell	PT cell	EC	FB	IC	kid-ECs	POD cell
XIST	XIST	ID3	ZBTB16	FTCD	PSG4	TSC22D3	CUTALP	PDK4	FOSB
MT-RNR2	MT2A	BTG2	P3H2	ACSM2B	PSG9	CCN2	NR4A1	MT2A	PLCG2
MT-CYB	MT1E	PDE10A	XIST	MT-RNR2	MT-RNR2	DUSP1	NR4A2	ARRDC2	PLA2R1
TMEM101	MT1H	ID1	CLDN16	PRPF4	AC004784.1	ERRFI1	GPC5	TSC22D3	EGR1
PLCG2	ZBTB16	H2AC19	WNK1	GPX3	PSG5	FKBP5	GABPB1-AS1	CAVIN2	FOS
CCDC68	MT1G	WNK1	FKBP5	TIPARP	MALAT1	IFITM3	AL157815.1	MT1E	ITGA1
ATP6V1C2	MT1X	H2AC18	AASS	TACC1	MT-CO1	H2AC18	AC096741.1	FOS	PRMT1
DOCK8	CRYAB	GDF15	VAX2	XIST	GABPB1-AS1	PDE1A	NEAT1	SLC2A3	NR4A1
S100A13	TSC22D3	SLC8A1	TFCP2L1	FKBP5	MTRNR2L12	MDM2	TRPM7	TACC1	MYADM
UMOD	FTCD	AQP3	COL6A1	KCNC3	MT-ND4L	IFITM2	NAIP	RHOB	CIRBP
GABPB1-AS1	SGK1	XIST	MUC20-OT1	CYP3A5	MT-RNR1	GLUL	RP1	TMEM204	EGR3
AC243571.2	KCNJ16	NR4A1	PTH1R	MTRNR2L12	MT-ATP8	ID1	TTN	MT1X	TSC22D3
KCNC3	PDZK1IP1	TXLNGY	AHCYL1	NAPSA	APCDD1L-DT	PKHD1	RBKS	DDIT4	FP671120.8
ADAMTSL1	FKBP5	MT-CO1	NEAT1	ABLIM1	UMOD	FOSB	MUC20-OT1	ZFAND5	AC020916.1
ARHGAP6	ERRFI1	H2BC21	SLC16A12	ACE	PSG3	CPM	FOSL2	FKBP5	IRAK3
SYNE2	NUAK2	PWRN1	SEC14L1	AHNAK	FOSL2	PDE10A	EGR1	CLK1	CUTALP
B4GALNT2	TBC1D8B	SLC38A1	RIMBP2	MUC20-OT1	SGK1	TNNT2	MT-ATP8	ZBTB16	GLUL
BHLHE40	GADD45B	SLC45A4	CSRP1	AFM	MT-CYB	LONRF2	BHLHE40	HERPUD1	TPPP3
MAPKAP1	ACSM2B	H2AC6	HSD11B2	SLC4A7	MT-ATP6	PDK4	LINC00645	FP671120.8	ATP10D
BMPR1B	RHOB	PNP	VCL	ZBTB16	MT-CO2	TACC2	MT-CYB	SCNN1A	C6
MT-CO1	MEG3	ARL4D	NPSR1-AS1	RAB11FIP3	PWRN1	ZFP36L2	MT1E	NR4A1	NDRG2
MTCO1P12	SLC5A12	H2BC18	AL137782.1	FTL	HES1	LAMA3	KLF6	MT1M	STXBP3
TTC39B	AC105052.4	SLC8A1-AS1	DEFB1	PRODH2	IER3	MT-ATP8	ERBB4	MUC20-OT1	SOX2-OT
PLEKHA5	USP2	ID2	P4HA1	P3H2	HMGCS2	F5	PDE10A	BHMT2
ZBTB16	ACTB	AC005062.1	MRPS6	ALDH1L1	MTCO1P12	GADD45B	SH3RF1	MAF
CIT	UMOD	ID4	COL8A1	MT1E	MT-ND1	SLC7A2	RIMBP2	RAPGEF5
MUC20-OT1	RASA4B	SH3BP5	ATP1B1	SELENOW	VMP1	ALDH1A2	LINC02532	CDH16
LINC02694	MT1F	ST6GAL1	CKB	GABPB1-AS1	LDLR	SORT1	GDF15	ABCC5
PPARG	ZFP36	PLEKHA2	TEX41	SUCLG1	MT-ND2	CFH	AL136164.2	CA4
THUMPD3-AS1	PER1	IER3	ANK2	NFE2L1	HOXB3	ERGIC1	MTFR1L	PAX8
ATF3	NFKBIA	PAPPA	SELENOW	MT1X	VPS37B	NEDD9	LRRK2	TFCP2L1
ADM	SLC47A2	FXYD4	MYL6	RASA4CP	ARHGAP24	MT-ND5	FP671120.8	PKHD1
RHOA	FSTL3	H3-3B	SCML1	MT2A	MT-ND5	ZBTB16	FOS	CYFIP2
SERPINB1	SLC36A2	TSC22D1	ZFP36	FAAH	BICC1	TUB	DVL3	PI4KAP1
TNS2	ACSM2A	CHGB	IFIT5	ID2	HSD11B2	MAGI2	COA6-AS1	TAF1C
GATAD1	NFE2L1	TOB1	NAV2	UMOD	CBLB	PAWR	DDX17	SULT1C2
MT-ND1	ALDH1L1	DUSP1	AC138305.1	MIOX	MUC20-OT1	MT-CYB	SEC14L1	SOCS3
MT-ND6	FTH1	FOS	LPIN1	RNF212B	IGFBP7	TGFBR3	TNFSF10	KCNJ16
DNAH11	P3H2	NFE2L2	MIR503HG	HSP90AA1	MTMR10	RERG	SRRM4	LRRC37A3
YBX3	RAB11FIP3	SH3RF1	LMO7	RASA4B	LINC00645	AL031666.2	TMEM101	MT-ATP8
HMBOX1	EDN1	UTY	UTY	MT-RNR1	RBBP8	MAGI2-AS3	OSBPL3
DDX17	BICDL1	NPAP1	C14orf132	NAIP	BTG2	MFSD2A	RDH10
AC103563.2	RPL39P5	H1-4	PPP1CB	WASHC1	OSBPL3	H2AC19	TGFBR1
CLDN4	CDH16	H2BC5	SERPINA5	NUDT16	MOB1B	AC020916.1	HOXB3
CYB5A	AHNAK	USP9Y	MT-ATP6	AL034417.5	VCL	IRAK3	AC068631.1
CTNNAL1	RASA4CP	JUNB	MAP1LC3A	CPM	KL	VWA3A	KNG1
GPSM2	RASSF4	CLCNKB	TNFRSF12A	CTSH	RASD1	MACC1	TMEM38B
	NRG1	ZFP36L1	AL136164.2	CYFIP2	MT-ND6	WT1	OTUD6B-AS1
	GPX3	ACTG1	SSR3	SAT1	SLC9A4	AC025431.1	EGOT
	MT-ATP8	FP671120.8	MERTK	SLC36A2	MSMO1	LINC01320	PIK3C2G
	GADD45A	NR4A2	FP671120.8	CYP3A4	DCDC2	LINC01558	MT-ND1
	PRMT1	TMEM178A	ETNK1	PDZK1IP1	PFKP	PAX8-AS1	TRMT9B
	PTH1R	SIK1	DST	TFPI	P3H2	MPP3	ZNF385D
	PDK4	AQP2	KCNJ16	ALDH3A2	RTN4	ARHGAP10	PI4KAP1
	FGFR2	HSD11B2	MT-CYB	D2HGDH	FGFR2	H1-3	WNK1
	LIFR	RAPH1	TPST2	SCTR	EYA4	MT-ND4L	POLR2J3
	POLR2J3	KSR2	CAPN2	ATP1A1	UPP1	H2AC6	DEFB1
	RRAD	MST1P2	LINC01197	PI4KAP1	AL136164.2	HNF1A-AS1	PIK3C2A
	KLF9	MUC20-OT1	MT-ATP8	SDHAP1	STX7	LINC02532	NABP1
	TACC1	BHLHE40	MIR22HG	SOCS2	CDK6	XIST	SMIM5
		H1-0	SDC4	ADD1	NUAK2	RHOB	LRRC37A4P
		ATF3	CCNB1IP1	TLN1	LGR4	IGFBP4	CLCNKB
		ZC3HAV1	S100A6	SLC9A3-AS1	TMEM101	LRRK2	GSTM3
		GALNT11	PFKP	ERBB2	BLNK	BICC1	TMTC1
		MACC1	DANT2	ZNF826P	MTATP8P1	NSMF	DUSP1
		GPRIN3	MOB3B	NABP1	CYB5A	GPX3	CTDSPL
		AC019080.3	TIPARP	GADD45A	MAP2K3	HRCT1	ITPR1
		PTMA	CGNL1	YBX3	SELENOW	ABCG1	ATF3
		ITGB8	IFRD1	TACC2	YPEL2	SLC4A11	AC105052.4
		PRMT1	AC083843.3	MT1G	S100A6	IGFBP7	SYNE2
		ADAMTSL3	PROX1	IYD	ZNF83	PTGDS	SNX29
		JUND	LINC00472	AP2A2	COA6-AS1	KIRREL3	CALCR
		AC105052.4	OGDHL	CEMIP2	ZNF608	BICD1	PLEKHD1
		WWTR1	SFRP1	LUC7L3	ABCB1	KCNJ16	SDHAP1
		ESYT2	MST1L	ANKRD18CP	TXNIP	SLC39A14	AP000873.2
		PDE7B	LINC01055	RASSF7	CUTALP	WT1-AS	PAWR
		IVNS1ABP	SLC22A2	IFIT5	GSTM3	AFDN	MT-ND4L
		KDM5D	GADD45B	F13A1	HP1BP3	MAF	NAIPP4
		MST1L	SGK1	GRAMD1B	DDX17	H2BC8	CCDC18-AS1
		HES1	DEPTOR	HIPK3	ZSWIM6	EPB41L5	CNOT6L
		CD24	SGPP2		PPP1CB	DPY19L3	TACC2
		SAT1	SLC25A25		KCNJ1	SPIDR	AC129492.3
		AC019080.4	CASK		ACTN4	RPL10	DCDC2
		SULT1C2	ATP6V0E1		INSIG1	RBFOX1	XIST
		DDX3Y	ACP3		PTMA	CUTALP	KITLG
		PER1	RAPGEF3		NAIP	FTL	SLC22A2
		PGAP1	RDH8		APP	NEAT1	PDK4
		PRR26	NFE2L2		TPM4	MT-ATP6	Z98752.3
		LINC02532	TUFT1		ID2	HSPB8	KL
		PLCL2	AC087045.3		TMPRSS2	RAPGEF3	SRSF7
		TMEM52B	MGLL		DCPS	ACADL	B4GALT4
		SEPTIN2	ELL2		OTUD6B-AS1	CREB5	CHP1
		MT-CO2	CLMN		ADGRL2	TACC1	COQ9
		DCUN1D1	PIM3		PDE1A	LONRF1	ATP5MC1
		TTN	ACTB		SCCPDH	CRNDE	PCDHGA1
		ATP1B3	FLNA		GATAD1	PLA2R1	CD24
		AC145124.1	IGFBP7		ZFP36	DNAH11	PRPF4
		NASP	FAM110C		GPC5	CCDC200	FRMD4A
		CCNT2	RBM20		ITGB8	HNRNPLL	CLDN8
		UGT3A1	NOTCH2		SLC19A2	SATB2	GATAD1
		COL4A1	EFHD1		BCAM	HMGCS1
		POLR2J3	USP53		TRIB1	EGOT
		CPAMD8	JADE1		HMGCS1	MAP1LC3A
		ACTB	ATP5MC3		TNFRSF12A	MT1E
		ZFYVE16	IFIT1		COL4A5	MT-CO1
		SLC25A29	FGFR3		COBLL1	MT2A
		USP36	DPY19L2		SETDB2	PAG1
		ADAM9	RHOBTB3		JAG1	PIEZO1
		RANBP2	TBRG1		NPAP1	ID4
		STAM	NHS		LMNA	COL4A5
		UACA	ALCAM		MIR22HG	MROH1
		AFF1	SULT1C2		SLC45A4	TNC
		MECOM	MYL6B		MAL	BCL6
		PCGF5	YWHAZ		FGD3	MSMO1
		MT-RNR2	BLCAP		NEDD4L	CLDN4
		PTP4A1	TMEM120B		TMEM184C	PRKCI
		SRGAP3	MTURN		KIZ-AS1	PCA3
		KLF6	BDKRB2		MAP3K14	FOXP2
		KCNJ15	PGAP6		LRCH1	LGALS8
		LRRFIP1	AC129492.3		SLC39A8	H1-0
		AC019197.1	ZFAND5		KIZ	ELMO1
		MYO1E	MT-ND1		IQUB	LINC01197
		POU5F1	MT-ND5		KLF6	SEL1L3
		ACSM2A	MST1P2		TEAD1	AC018730.1
		PIM3	PTGES3		ARHGEF28	H2BC21
		CALB1	CCNL1		LAMB4	FGFR3
		PLCG2	CREB3L2		TGIF1	FTH1
		ZNF208	ERBB4		ACSL4	CALB1
		ABTB2	SRSF5		RNF43	RBPMS
		SLC11A2	SDHAP1		AC068631.1	CEBPD
		AGAP12P	GYG2P1		CSRP1	LBH
		ACSM2B	IYD		NR2F2	CACNA1H
		TC2N	ENDOD1		CRIM1	ZNF846
		GNAI1	LGR4		RFX3-AS1	AQP9
		TCF7L1	ACTN1		BCL2	SULT1C2
		SCN3A	FXYD2		HMGCR	RIC8B
		GATA3	EIF1		FRMD4A	RIPOR1
		PRODH2	CLCNKA		CREBRF	SLC25A16
		PPP1R10	CHP1		BBS2	MT-ND1
		PDK4	RAP1GAP		CYS1	IGFBP2
		RAB6A	ACTG1		CROT	EIF1
		AC093583.1	SYT10		SCNN1G	MVD
		MT-ATP6	LCN12		AC010997.4	OR2A42
		PPP2R1A	MYOF		ERBB2	THRB
		STIM2	FAM199X		FTL	LHFPL3-AS2
		SAMD11	CNN2		H2AC6	DCDC2
		KCNIP4	NFIB		PPIE	MTCO1P12
		ZNF98	WDR72		SQLE	CPEB4
		C3orf52	STK39		CISH	PROM1
		EGR1	CISH		KLHL24	FN3K
		RDH10	BICDL1		WDR1	FP671120.8
		FTCD	ENOX1		HELB	CHL1
		REL	SF1		WSB1	CLIP4
		SIK2	ARFGAP3		ATP1B3	H1-4
		MIOX	AL132780.1		SLC12A3	ATP2B1
		CLU	HSPD1		XPO1	PLCE1
		ZNF676	PLIN5		SLC35B4	ABCA13
		HOXD11	TSC22D3		AC005746.2	EIF3M
		AF117829.1	KCNAB1		ADH5	CRYAB
		EIF5B	ALDH1L1		MITF	ID3
		ZNF827	STAT3		SESTD1	H1-2
		RNF24	TSC22D2		HACD1	SLC7A6
		TXNIP	PAPLN		MIR222HG	OTUD6B-AS1
		ALAS1	CPM		HECTD1	XIST
		MTUS1	GABARAPL1		TFCP2L1	SLC2A3
		ELF5	MT2A		RNF114	TIPARP
		CDH16	TACC2		CTSH	C7
		ARHGAP24	TXNIP		TMEM59
		OR2A20P	INPP4B		HMGN3
		TFCP2L1	LPP		KIFC3
		RAI14	CHCHD10		PKP4
		AC074386.1	RP1		NR3C2
		SCN2A	RASD1		TEX41
		USP34	MT-ND4L		SNHG29
		GPCPD1	PRR26		CA12
		S100A6	MST1		MTND2P28
		ELL2	EMD		PROM1
		SLC12A1	CCDC18-AS1		KANK1
		MT-ND6	SIK2		GLS
		BICC1	CYSTM1		MTURN
		MCCC1	BAIAP2		KLHDC2
		SDK1	MAPK4		EPHA2
		TFDP1	DGKH		ATG2B
		MTMR10	RADX		ITGB6
		AC010329.1	AKIRIN1		KCNJ15
		ZNF331	AK3		TFAP2A
		JUN	UQCC2		STON2
		RLF	SCN7A		ITM2B
		COL4A2	SH3YL1		AL157935.2
		AC004593.2	KLHL13		PTGER3
		SLC7A1	ACTR3		CYFIP2
		NAV2	WDR1		LINC01606
		ALOX12P2	DCXR		CALB1
		CIRBP	SLC12A1		ERMP1
		MT-ND5	PITPNB		SH3RF1
		KHDC4	SVIL		HSPA8
		TFAP2B	RIMKLB		CPLANE1
		GOT1	AC131392.1		NR2F2-AS1
		FAM20A	ARID5B		GRAMD2B
		DOC2B	MIR222HG		PTPN13
		RPLP1	ATP5MC1		VGLL4
		ACOT11	RTL8C		MSI2
		ZFHX3	AP000757.2		S100A2
		ZSWIM6	SCNN1A		TSGA10
		BAG1	MAGI2		ADAMTS16
		NRDC	CALCR		SHROOM3
		U2AF1	AP5M1		ARL4C
		TRIM66	GPC5		GPR132
		GATA2	TP53INP2		IFRD1
		AP001528.1	CA4		FOSB
		DST	SYNE2		MBNL2
		SEC14L1	DUSP15		PGM5
		MT-ND4L	GPR132		UBA5
		HOXB7	CSNK1A1		NHSL1
		ARHGEF5	LAMB4		SMAD1
		POLR3E	PROSER1		BRD8
		CLCN3	CNKSR3		CREG1
		IDS	AC040174.1		NTN4
		SLC44A1	LONRF1		ABTB2
		AC022826.2	BHLHE40		SIK2
		AC092683.1	AC093525.2		WWC2
		CDKL1	GOT1		SLC38A11
		SYNE1	DENND2A		ZCCHC9
		TTN-AS1	DENND3		LINC00472
		UBC	WDFY2		QTRT1
		PAX8-AS1	TMEM207		AL117339.4
		MIR99AHG	ABLIM1		PLCZ1
		C9orf72	PLS3		BX470102.1
		ARPC2	CA12		TGOLN2
		BICD1	FNBP1L		HMGA1
		NUAK2	UBE2E2		RPS26
		OR10AB1P	TINAG		CLIP4
		CA12	ATP6V0D2		CLDN8
		PTH1R	FREM1		ELL2
		CDC42BPB	CHORDC1		MAML2
		SCNN1A	CYCS		PAPSS1
		GNB5	DHX15		LRRFIP1
		RPL32P3	KRT7		ASAP2
		CDK12	WSB1		NSD1
		CEBPZ	PIP5K1A		FAM102A
		SCPEP1	AL390719.2		SDCCAG8
		NUTM2A-AS1	RPS4Y1		CELSR2
		LINC00472	SEC22B		AC124944.2
		SRPRA	PLA2G12A		FRY
		MT-ND2	DSCAML1		CCDC90B
		CD9	LDHB		ACTR3
		C3orf86	NRK		CAP2
		GAB1	SEPTIN9		ABLIM1
		CUBN	DUSP1		ATP6V1H
		NOL4L	MTX2		CFAP298-TCP10L
		MGAT4A	TLE1		KDM6B
		STAT3	MRPL27		KIF3A
		GPX3	LINC02343		DUSP1
		PLAC4	GPI		KNG1
		AL138752.2	RAP2C		C9
		TBC1D16	SLC16A5		MPHOSPH8
		MTCO1P12	ARF4		PNPLA2
		SCCPDH	CBWD1		SYTL2
		CLCNKA	TMEM165		ASAH1
		SQSTM1	MIDN		UGT3A1
		CEMIP2	BCRP3		AC090360.1
		SEMA6A	SHROOM3		CLIP1
		FOSL2	EIF4A2		MRPS6
		PCSK7	LINC02532		FHOD3
		AC068205.2	MKNK2		DLGAP1-AS2
		APOB	FAM131A		PDE5A
		OR2A1	PI4KAP1		SPATS2
		RB1	PAX2		PGAP1
		KCNJ16	FOXO3		AL929236.1
		GRB14	MAT2A		LONRF2
		CYB5A	PCCA-DT		WDFY2
		AMY2B	HSPE1		ERRFI1
		FN3K	HPCAL4		HOXA-AS2
		PRH1	IP6K2		PAG1
		SLK	BAG5		MFHAS1
		HSPA1B	LINC01278		DYNC2LI1
		SLC6A13	ATP1A1		MFN1
		PSMD6	ABCA5		MAFF
		AHI1	LRCH1		PLXNB2
		NUP98	SLC19A2		RAD17P2
		RALBP1	COX4I1		DACH1
			RAB11FIP3		IMMP2L
			TMSB10		KMT2E-AS1
			TRAPPC6B		GLUL
			DDB1		MIR99AHG
			MT-CO1		CCNG2
			ECHDC2		ASCC1
			RBPMS		EPS8L2
			COX5A		MTSS1
			TRIB2		NBR1
			LENG8		SDHAP1
			MAGI2-AS3		OVCH2
			SLC7A8		FAM133B
			OCIAD1		PLS3
			RALGPS1		SOX13
			EIF3K		ATP8A1
			LINC01606		PIK3CB
			PDK4		IRAK1BP1
			NBPF19		CDH16
			PTPRG		DTWD1
			MRRF		NR0B2
			PRDX6		SLF2
			BCL2		ERC1
			SELENBP1		SLC12A1
			ST7		RPS27L
			NAIP		KRT19
			NUFIP2		MT-ND3
			PPIE		ATP8B1
			RPL10		AC103810.2
			CCND1		HIF1A
			CNN3		DDX11
			PER1		SPTBN2
			IER3		COL4A6
			JUNB		HNMT
			EPN1		SLC9C1
			UBE2D3		NOTCH2
			MAPK1IP1L		FRG1HP
			AC007040.2		GLRX
			NOS1		SIM1
			CLEC16A		TMEM51
			ARMC7		AIF1L
			ZNF10		EZR
			TRAF4		CREM
			GSTM3		JUP
			SLC6A8		ALAS1
			TMEM52B		TCAIM
			MYH9		LPIN2
			HIBADH		PREPL
			ICA1		BIVM-ERCC5
			RPS18		MYO9A
			C3orf52		ACVR1B
			DNAJC19		PSMG2
			ATP5MG		WDR48
			SLC4A8		MAP4K3
			LPIN3		PLCL2
			SLC36A4		TMEM38B
			ANKRD36B		PRKAG2
			PTPN4		RPL12
			LINC00958		RPL11
			CMC2		MRPS31
			LAMA1		ELP2
			AC006059.2		CD151
			SEC23A		AKT3
			AC068547.1		PHYH
			COX7C		GDF15
			SFPQ		SPAG16
			SERF2		ZC2HC1A
			LRRFIP2		PFKFB3
			UVRAG		HSPE1
			HSPB2-C11orf52		NR1D1
			GAD1		SENP3-EIF4A1
			RPL10A		NAV2
			MYO19		AFF4
			FTL		TSPAN5
			TBC1D4		LINC01943
			TBC1D1		ALDH7A1
			SLC25A33		WNK1
			NABP1		FAM20A
			HMGN1		SKIL
			PRR15L		GATA3
			SLC9A3-AS1		SOX4
			SLC35F5		PIK3C3
			AC006486.1		TPM1
			TLE5		PRR15
			ANXA3		PODXL
			GLRX		DOCK7
			AC004982.2		RPL13
			AP1S2		PAX8
			ANKRD10		GLDC
			IGF2BP2		SLC2A1
			MRTFA		OGFRL1
			NAPA		MBOAT1
			EP400P1		AC020916.1
			MT1E		PTH1R
			LINC01535		CAT
			ATP5F1B		PPFIBP2
			FAM118A		MITD1
			AC009690.3		TMEM260
			LEPROT		CHD2
			ACSL1		ZC3H14
			RNF10		TRMT1L
			YBX3		MBD4
			LIMCH1		WHAMMP2
			RGN		NHLRC3
			POLR2J3		NNT
			STAT5A		TOP1
			PLEKHB2		INTS3
			PLEKHJ1		CPSF1
			ATP5F1D		SGMS2
			RLIM		NUDT12
			NPR3		RBM45
			PRDM16-DT		CEP76
			PCDH1		AC017002.3
			DSTN		ME3
			ATP6V0A4		EDEM3
			MBOAT2		ERLIN1
			AC073283.3		CLDN4
			MGME1		GUSBP2
			YWHAQ		ICE2
			ABCD3		AF241726.2
			AC009690.1		TNFRSF19
			AIF1L		VPS39
			ZNF208		ATP6V0A4
			KCTD16		FGD5-AS1
			WWP2		SMN1
			AJAP1		NPHP3-ACAD11
			SLC25A4		CFAP221
			HOOK2		ARID4A
			DIAPH1		RREB1
			CDC42		AC068580.4
			GNG5		SYNJ2BP-COX16
			CDK16		FNDC3B
			HMGCR		TTC13
			PRR5-ARHGAP8		DCAF17
			MIR29B2CHG		ARHGAP6
			FGD4		FAM13A
			CHCHD3		WEE1
			HSPH1		TANC1
			SMCO4		FOXP1
			FRY		SLC38A2
			DANCR		ZYX
			CECR2		DDX24
			RASSF10		EML4
			RBM39		SHOC1
			GPX3		CTNNAL1
			EGLN3		GRHL2
			IDS		AASDH
			SPP1		RPLP1
			TNFSF10		MST1L
			PTPN14		HIBADH
			DDIT3		LRRC37A4P
			KCP		CEP290
			FGFR1OP2		PXYLP1
			AC105052.4		AC106795.1
			ADCY5		DCAF6
			DUSP3		VAV3
			DELE1		SYK
			SAFB		RGS6
			CLCNKB		ATP5MC1
			HUS1		CIRBP
			SLC48A1		NUDT5
			TBC1D8B		RSRP1
			ECI2		PCM1
			GGNBP2		EDEM2
			VGLL4		SGMS1
			PFKFB2		EPRS1
			AL929236.1		AKAP1
			CYRIB		CEP104
			ITPRID2		DANT2
			HGD		HELLS
			TPD52L2		RIOX2
			MED9		LSM8
			RIC3		SNX5
			SRSF6		CLU
			ACP6		G3BP1
			USP2		FDFT1
			SLC25A27		PEX1
			MAGI1		GPR160
			PTPN2		TFB1M
			SH3RF1		ADAL
			KLF6		PABPC1L
			ATP5F1A		PSAP
			TBC1D16		UVRAG
			AC083843.4		ZNF91
			AP1G1		LGALS3BP
			SAP30BP		SHPRH
			PLA2G4F		MAP3K21
			RBM14		ADD3
			KCNC4		ABO
			GULP1		CLPX
			SLC20A1		NUCB2
			NDUFA13		MRTFB
			KRT8		HOMER1
			SOX4		RAPH1
			UBE2D2		SLC44A3
			CCT6A		METTL17
			TMEM30A		MYO5C
			GAPDH		MANBA
			CYC1		SYNE1
			PCK1		POLR2J3
			ANKRD36C		KANSL1L
			SLC25A6		GPAM
			TIMP3		LYPLAL1
			PLAU		SLC39A6
			SDHD		SUMF2
			PCDHA1		THUMPD1
			LDLR		PER1
			PARP14		CDKN1A
			CYHR1		CD47
			UBE2A		C11orf80
			AKAP9		COX7C
			PDE4D		MGMT
			SAR1B		LINC01612
			FKBP2		HECTD2
			JMJD6		PPFIBP1
			FP236241.2		IRF1-AS1
			ANKRD9		CCNL1
			ACADVL		JKAMP
			OLA1		TOX
			ARHGAP29		SLC20A1
			ENY2		HSPA1B
			AC058822.1		PHF1
			FN3K		MIR4435-2HG
			EPOR		TNRC6A
			KCNJ1		DENND6A
			NRCAM		VASP
			SQSTM1		TRIM27
			C6orf62		FCHO2
			MRPL28		ATL3
			UTRN		SPTAN1
			ATP6V1FNB		SFPQ
			NUDT16		SPATA6
			ADAP1		RPS3
			HS6ST2		GCGR
			SLC3A1		GULP1
			GALNT10		AKAP11
			SAMD4A		LINC01762
			FLYWCH1		KIAA0319L
			PPDPF		TMEM117
			MIR3936HG		HOXB7
			PRKAG2		ADM
			ZMYND8		RBL2
			ERICH1		HACD3
			PHF1		PLSCR1
			MRPS21		COG8
			QTRT1		HNRNPC
			PPP2R1B		EPC1
			KIFC3		ME2
			MKLN1-AS		KPNB1
			DYNLL1		AL591806.4
			GATAD1		RPS24
			GLDC		CYTOR
			PRRG4		ATP6V0E1
			DUSP12		CROCCP2
			MAP2K6		GPRC5B
			RRS1-AS1		DCAF11
			TMX2		RALYL
			NBDY		JUNB
			AC099811.2		LTBP3
			KIF23		SEMA6D
			BACE2		DHX29
			STOX2		KSR2
			ETS2		SPTLC2
			FOS		PIGQ
			MEF2C		NAB2
			SPINT1
			MCF2L
			SYNE1
			PRKD1
			BHMT2
			NPY1R
			AC018730.1
			UMAD1
			HPRT1
			ZNF676
			AC003688.2
			ALPK3
			GLIS3
			CUTALP
			GDF15
			ZNF334
			UCHL1
			MRPS25
			SENP2
			SLC12A3
			BPTF
			PFKFB3
			SAT1
			TMED10
			BDH1
			KIAA1522
			PIGH
			CD44
			PRMT1
			CLEC2D
			RNF212
			PMF1-BGLAP
			LINC01320
			CLEC18B
			AC092078.2
			AC027031.2
			AC068620.3
			MGAT5
			WDR18
			BCAT2
			AGAP9
			EGR1
			LINC02432
			FAM13A
			STON1
			ANKRD44
			LAMB1
			MACROD1
			NDFIP2
			PRKCQ
			C6orf136
			MIER1
			ADAMTS9-AS1
			SULT1C4
			ZC3H14
			BOD1L1
			LINS1
			GRB14
			NR4A1
			XIST
			CUTALP
			ZFP57
			BHLHE40
			RCAN1
			CUZD1
			KLF6
			JUN
			DDIT3
			TXLNGY
			RANBP3L
			SQSTM1
			UTY
			ATF3
			EGR1
			PDE11A-AS1
			AC019197.1
			TMEM101
			GABPB1-AS1
			IGFBP5
			MUC20-OT1
			ZBTB16
			IRS1
			SCN3A
			GPT2
			VAV3
			PTPN20
			GADD45G
			MAP2K3
			SLC26A7
			SCN2A
			AC003688.2
			PXK
			P3H2
			ELF3
			ADGRF1
			TRIM73
			DDX3Y
			ACTG1
			HIF1A
			MCOLN3
			PART1
			IL18
			CD24
			NEAT1
			PI4KAP1
			LINC01187
			HMGCS1
			JADE1
			TNS4
			GPSM2
			KCNC3
			TTTY14
			HSPA5
			EGFR
			FKBP5
			KIAA1217
			ATP6V0A4
			SLC25A3
			VPS37B
			DST
			VCL
			HOXB3
			AC005062.1
			CACNA1D
			SPARCL1
			OTUD6B-AS1
			ATP6V1C2
			ITGAV
			MIDEAS
			AL591684.2
			GRB14
			RELB
			USP9Y
			TUFT1
			CLTC
			FBXO34
			SLC25A33
			FAM24B
			POLR2J3
			B2M
			COL6A1
			RASD1
			CHCHD2
			CCNI2
			NUTM2A-AS1
			TRIB1
			AC093512.2
			ARL5B
			FBXW11
			GNG12
			CIRBP
			NAGS
			HOXA3
			ARPC2
			WDR1
			TMEM213
			EIF2AK3
			RSRP1
			KDM6B
			HSD11B2
			NAIP
			AC138305.1
			NAIPP4
			PDE11A
			AC083843.4
			AL158801.1
			BCO2
			NFAT5
			PIM1
			NPC1
			SYT10
			STK17A
			SORBS2
			ADM
			ACTB
			LMO7
			GNPNAT1
			C1orf21
			SLC20A1
			LRRC37A4P
			MTFR1L
			PNPLA8
			RLF
			LITAF
			MT1X
			MPP7
			MIR22HG
			CKB
			PDE1A
			NR2F2
			CTDSP1
			DEFB1
			UBC

## Sheet: Table S4
Supplementary Table S4: Data analysis and information of DKD kidney scRNA sequencing from GSE131882
	orig.ident	nCount_RNA	nFeature_RNA	type	percent.mt	group	group1	RNA_snn_res.0.5	seurat_clusters	RNA_snn_res.0.3	celltype
AAACCTGAGTGTTAGA_1	SeuratProject	6736	1035	GSM3823939_control.s1.dgecounts.rds	0.37114	control1	control	6	1	1	Proximal tubular cells
AAACCTGCAAGCGCTC_1	SeuratProject	13530	1855	GSM3823939_control.s1.dgecounts.rds	1.01996	control1	control	7	0	0	Distal tubular cells_1
AAACCTGCACCAGATT_1	SeuratProject	13536	1624	GSM3823939_control.s1.dgecounts.rds	1.32979	control1	control	7	0	0	Distal tubular cells_1
AAACCTGCATGGAATA_1	SeuratProject	15368	1765	GSM3823939_control.s1.dgecounts.rds	10.7691	control1	control	5	5	5	Epithelial cells
AAACCTGGTATTCGTG_1	SeuratProject	21476	2515	GSM3823939_control.s1.dgecounts.rds	11.6549	control1	control	3	1	1	Proximal tubular cells
AAACCTGGTTCGGGCT_1	SeuratProject	11127	1345	GSM3823939_control.s1.dgecounts.rds	2.46248	control1	control	0	3	3	Intercalated cells
AAACCTGTCGCCTGAG_1	SeuratProject	17413	2032	GSM3823939_control.s1.dgecounts.rds	2.41199	control1	control	7	0	0	Distal tubular cells_1
AAACGGGAGAAACCAT_1	SeuratProject	21061	2407	GSM3823939_control.s1.dgecounts.rds	2.15564	control1	control	3	1	1	Proximal tubular cells
AAACGGGAGCCCAATT_1	SeuratProject	21649	2219	GSM3823939_control.s1.dgecounts.rds	5.6677	control1	control	7	0	0	Distal tubular cells_1
AAACGGGCAGCTCGCA_1	SeuratProject	8903	1116	GSM3823939_control.s1.dgecounts.rds	1.62866	control1	control	12	10	10	B cell
AAACGGGCATAGAAAC_1	SeuratProject	9030	1123	GSM3823939_control.s1.dgecounts.rds	7.68549	control1	control	11	7	7	Fibroblasts_1
AAACGGGCATCACGTA_1	SeuratProject	15022	1883	GSM3823939_control.s1.dgecounts.rds	1.66423	control1	control	7	0	0	Distal tubular cells_1
AAACGGGGTAAGAGGA_1	SeuratProject	27961	2838	GSM3823939_control.s1.dgecounts.rds	1.0765	control1	control	3	1	1	Proximal tubular cells
AAACGGGGTCGCATAT_1	SeuratProject	15422	1947	GSM3823939_control.s1.dgecounts.rds	1.01154	control1	control	0	3	3	Intercalated cells
AAACGGGGTGCTCTTC_1	SeuratProject	15727	1714	GSM3823939_control.s1.dgecounts.rds	0.902906	control1	control	12	10	10	B cell
AAACGGGGTGTGACCC_1	SeuratProject	8785	1296	GSM3823939_control.s1.dgecounts.rds	1.60501	control1	control	6	1	1	Proximal tubular cells
AAACGGGGTTCCGGCA_1	SeuratProject	13461	1310	GSM3823939_control.s1.dgecounts.rds	3.75901	control1	control	5	5	5	Epithelial cells
AAACGGGGTTGTGGCC_1	SeuratProject	40645	3738	GSM3823939_control.s1.dgecounts.rds	3.05327	control1	control	8	6	6	neutrophil
AAACGGGTCCGCAAGC_1	SeuratProject	20490	2250	GSM3823939_control.s1.dgecounts.rds	9.28258	control1	control	4	4	4	Distal tubular cells_2
AAACGGGTCCTGTAGA_1	SeuratProject	15205	1987	GSM3823939_control.s1.dgecounts.rds	4.11707	control1	control	4	4	4	Distal tubular cells_2
AAACGGGTCGGAGCAA_1	SeuratProject	6517	862	GSM3823939_control.s1.dgecounts.rds	3.74405	control1	control	9	8	8	kidney endothelial cells
AAAGATGCAGTTTACG_1	SeuratProject	16830	1954	GSM3823939_control.s1.dgecounts.rds	1.68152	control1	control	7	0	0	Distal tubular cells_1
AAAGATGGTCCAGTGC_1	SeuratProject	12634	1108	GSM3823939_control.s1.dgecounts.rds	48.2508	control1	control	7	0	0	Distal tubular cells_1
AAAGATGTCAGATAAG_1	SeuratProject	15229	1926	GSM3823939_control.s1.dgecounts.rds	1.01123	control1	control	7	0	0	Distal tubular cells_1
AAAGATGTCATTGCCC_1	SeuratProject	15322	1757	GSM3823939_control.s1.dgecounts.rds	1.351	control1	control	0	3	3	Intercalated cells
AAAGCAAAGAACAACT_1	SeuratProject	12355	1673	GSM3823939_control.s1.dgecounts.rds	1.51356	control1	control	7	0	0	Distal tubular cells_1
AAAGCAAAGACAAGCC_1	SeuratProject	28933	2866	GSM3823939_control.s1.dgecounts.rds	15.052	control1	control	7	0	0	Distal tubular cells_1
AAAGCAAAGGCATTGG_1	SeuratProject	43744	3806	GSM3823939_control.s1.dgecounts.rds	4.72751	control1	control	4	4	4	Distal tubular cells_2
AAAGCAACATGTTCCC_1	SeuratProject	8848	1221	GSM3823939_control.s1.dgecounts.rds	1.03978	control1	control	0	3	3	Intercalated cells
AAAGCAACATTGGGCC_1	SeuratProject	17554	1961	GSM3823939_control.s1.dgecounts.rds	0.831719	control1	control	5	5	5	Epithelial cells
AAAGCAAGTCGCTTCT_1	SeuratProject	6854	1430	GSM3823939_control.s1.dgecounts.rds	1.73621	control1	control	3	1	1	Proximal tubular cells
AAAGCAAGTCTCATCC_1	SeuratProject	12733	1618	GSM3823939_control.s1.dgecounts.rds	2.21472	control1	control	3	1	1	Proximal tubular cells
AAAGCAATCATGCATG_1	SeuratProject	19314	2390	GSM3823939_control.s1.dgecounts.rds	0.647199	control1	control	3	1	1	Proximal tubular cells
AAAGCAATCTCAAACG_1	SeuratProject	9619	1353	GSM3823939_control.s1.dgecounts.rds	1.10199	control1	control	11	7	7	Fibroblasts_1
AAAGTAGCAAGCGAGT_1	SeuratProject	9780	1388	GSM3823939_control.s1.dgecounts.rds	1.60532	control1	control	8	6	6	neutrophil
AAAGTAGCATGGATGG_1	SeuratProject	10905	1277	GSM3823939_control.s1.dgecounts.rds	0.962861	control1	control	5	5	5	Epithelial cells
AAAGTAGTCAAAGTAG_1	SeuratProject	6705	1115	GSM3823939_control.s1.dgecounts.rds	4.38479	control1	control	8	6	6	neutrophil
AAAGTAGTCCAGTAGT_1	SeuratProject	11298	1429	GSM3823939_control.s1.dgecounts.rds	2.17738	control1	control	10	9	9	podocytes
AAAGTAGTCCTTTACA_1	SeuratProject	11661	1433	GSM3823939_control.s1.dgecounts.rds	1.7923	control1	control	5	5	5	Epithelial cells
AAAGTAGTCGAACGGA_1	SeuratProject	17172	2218	GSM3823939_control.s1.dgecounts.rds	0.920102	control1	control	3	1	1	Proximal tubular cells
AAATGCCAGTCTTGCA_1	SeuratProject	22314	2643	GSM3823939_control.s1.dgecounts.rds	1.08004	control1	control	3	1	1	Proximal tubular cells
AAATGCCCACATCTTT_1	SeuratProject	10273	1357	GSM3823939_control.s1.dgecounts.rds	0.476978	control1	control	7	0	0	Distal tubular cells_1
AAATGCCGTAAGGATT_1	SeuratProject	13196	1669	GSM3823939_control.s1.dgecounts.rds	1.47772	control1	control	0	3	3	Intercalated cells
AAATGCCGTAGCGATG_1	SeuratProject	7720	1048	GSM3823939_control.s1.dgecounts.rds	2.91451	control1	control	0	3	3	Intercalated cells
AAATGCCGTTCTGTTT_1	SeuratProject	22466	2246	GSM3823939_control.s1.dgecounts.rds	8.79551	control1	control	4	4	4	Distal tubular cells_2
AAATGCCGTTGTCTTT_1	SeuratProject	31580	3197	GSM3823939_control.s1.dgecounts.rds	0.60798	control1	control	3	1	1	Proximal tubular cells
AAATGCCTCAATACCG_1	SeuratProject	9089	1165	GSM3823939_control.s1.dgecounts.rds	1.66135	control1	control	5	5	5	Epithelial cells
AAATGCCTCGCATGAT_1	SeuratProject	37538	3507	GSM3823939_control.s1.dgecounts.rds	5.40253	control1	control	4	4	4	Distal tubular cells_2
AACACGTAGATACACA_1	SeuratProject	8719	1376	GSM3823939_control.s1.dgecounts.rds	2.79849	control1	control	3	1	1	Proximal tubular cells
AACACGTCATTAACCG_1	SeuratProject	16904	1849	GSM3823939_control.s1.dgecounts.rds	12.0031	control1	control	7	0	0	Distal tubular cells_1
AACACGTGTGGGTATG_1	SeuratProject	17555	2485	GSM3823939_control.s1.dgecounts.rds	1.13358	control1	control	7	0	0	Distal tubular cells_1
AACACGTGTTCCATGA_1	SeuratProject	10671	1538	GSM3823939_control.s1.dgecounts.rds	1.33071	control1	control	5	2	2	Collecting duct cells
AACACGTGTTGTTTGG_1	SeuratProject	13689	2074	GSM3823939_control.s1.dgecounts.rds	0.986193	control1	control	7	0	0	Distal tubular cells_1
AACACGTTCATTATCC_1	SeuratProject	7121	1022	GSM3823939_control.s1.dgecounts.rds	7.04957	control1	control	3	1	1	Proximal tubular cells
AACACGTTCCATGAGT_1	SeuratProject	8007	1076	GSM3823939_control.s1.dgecounts.rds	3.59685	control1	control	12	10	10	B cell
AACACGTTCGGTGTTA_1	SeuratProject	34439	3029	GSM3823939_control.s1.dgecounts.rds	11.005	control1	control	4	4	4	Distal tubular cells_2
AACCATGAGGACTGGT_1	SeuratProject	6731	1120	GSM3823939_control.s1.dgecounts.rds	1.91651	control1	control	3	1	1	Proximal tubular cells
AACCATGCATCCGGGT_1	SeuratProject	10278	1277	GSM3823939_control.s1.dgecounts.rds	4.17396	control1	control	3	1	1	Proximal tubular cells
AACCATGGTGCGATAG_1	SeuratProject	27431	2954	GSM3823939_control.s1.dgecounts.rds	0.448398	control1	control	3	1	1	Proximal tubular cells
AACCGCGAGTAATCCC_1	SeuratProject	22093	1932	GSM3823939_control.s1.dgecounts.rds	24.7001	control1	control	7	0	0	Distal tubular cells_1
AACCGCGCAGTGAGTG_1	SeuratProject	13255	1613	GSM3823939_control.s1.dgecounts.rds	2.03697	control1	control	7	0	0	Distal tubular cells_1
AACCGCGCATGTTGAC_1	SeuratProject	7295	1118	GSM3823939_control.s1.dgecounts.rds	1.45305	control1	control	7	0	0	Distal tubular cells_1
AACCGCGGTAAGTAGT_1	SeuratProject	7392	1421	GSM3823939_control.s1.dgecounts.rds	0.987554	control1	control	0	3	3	Intercalated cells
AACCGCGGTCAGCTAT_1	SeuratProject	8933	1538	GSM3823939_control.s1.dgecounts.rds	1.16422	control1	control	7	0	0	Distal tubular cells_1
AACCGCGGTGCACTTA_1	SeuratProject	18173	2408	GSM3823939_control.s1.dgecounts.rds	1.28212	control1	control	5	5	5	Epithelial cells
AACCGCGGTGTGTGCC_1	SeuratProject	12380	1793	GSM3823939_control.s1.dgecounts.rds	1.38934	control1	control	7	0	0	Distal tubular cells_1
AACCGCGGTTTAAGCC_1	SeuratProject	11548	1690	GSM3823939_control.s1.dgecounts.rds	1.16903	control1	control	0	3	3	Intercalated cells
AACCGCGTCTTGTCAT_1	SeuratProject	12699	1826	GSM3823939_control.s1.dgecounts.rds	1.85841	control1	control	3	1	1	Proximal tubular cells
AACGTTGAGCTACCTA_1	SeuratProject	16112	1952	GSM3823939_control.s1.dgecounts.rds	1.0427	control1	control	10	9	9	podocytes
AACGTTGAGTACGCGA_1	SeuratProject	24610	2573	GSM3823939_control.s1.dgecounts.rds	1.35311	control1	control	3	1	1	Proximal tubular cells
AACGTTGAGTAGTGCG_1	SeuratProject	11001	1454	GSM3823939_control.s1.dgecounts.rds	1.29988	control1	control	5	5	5	Epithelial cells
AACGTTGCAATGGTCT_1	SeuratProject	7475	1073	GSM3823939_control.s1.dgecounts.rds	6.56856	control1	control	4	4	4	Distal tubular cells_2
AACGTTGCACAGACAG_1	SeuratProject	13411	1562	GSM3823939_control.s1.dgecounts.rds	1.17068	control1	control	0	3	3	Intercalated cells
AACGTTGCAGTTTACG_1	SeuratProject	14618	1895	GSM3823939_control.s1.dgecounts.rds	1.08086	control1	control	3	1	1	Proximal tubular cells
AACGTTGCATATGAGA_1	SeuratProject	8361	1030	GSM3823939_control.s1.dgecounts.rds	1.51896	control1	control	5	5	5	Epithelial cells
AACGTTGGTATATCCG_1	SeuratProject	9858	1385	GSM3823939_control.s1.dgecounts.rds	1.53175	control1	control	7	0	0	Distal tubular cells_1
AACGTTGGTCACAAGG_1	SeuratProject	14954	1816	GSM3823939_control.s1.dgecounts.rds	0.949579	control1	control	7	0	0	Distal tubular cells_1
AACGTTGGTCTAACGT_1	SeuratProject	14761	1702	GSM3823939_control.s1.dgecounts.rds	1.87657	control1	control	5	5	5	Epithelial cells
AACGTTGTCCAAACAC_1	SeuratProject	15664	1901	GSM3823939_control.s1.dgecounts.rds	1.52579	control1	control	5	5	5	Epithelial cells
AACGTTGTCTCAAACG_1	SeuratProject	11204	1444	GSM3823939_control.s1.dgecounts.rds	1.50839	control1	control	0	3	3	Intercalated cells
AACGTTGTCTGCTGTC_1	SeuratProject	12580	1565	GSM3823939_control.s1.dgecounts.rds	0.9062	control1	control	0	3	3	Intercalated cells
AACTCAGCAATGGTCT_1	SeuratProject	8428	1184	GSM3823939_control.s1.dgecounts.rds	2.74086	control1	control	2	0	0	Distal tubular cells_1
AACTCAGCACGCCAGT_1	SeuratProject	10840	1400	GSM3823939_control.s1.dgecounts.rds	0.461255	control1	control	0	3	3	Intercalated cells
AACTCAGGTCCATGAT_1	SeuratProject	12807	1504	GSM3823939_control.s1.dgecounts.rds	0.726165	control1	control	0	3	3	Intercalated cells
AACTCAGGTCTAGTGT_1	SeuratProject	17915	2364	GSM3823939_control.s1.dgecounts.rds	0.731231	control1	control	7	0	0	Distal tubular cells_1
AACTCAGGTGAGGGTT_1	SeuratProject	15320	1805	GSM3823939_control.s1.dgecounts.rds	0.698433	control1	control	7	0	0	Distal tubular cells_1
AACTCAGTCTCCTATA_1	SeuratProject	10099	1507	GSM3823939_control.s1.dgecounts.rds	0.772354	control1	control	6	1	1	Proximal tubular cells
AACTCCCGTGTCAATC_1	SeuratProject	13770	1783	GSM3823939_control.s1.dgecounts.rds	0.987654	control1	control	11	7	7	Fibroblasts_1
AACTCCCGTTCGGGCT_1	SeuratProject	8004	1179	GSM3823939_control.s1.dgecounts.rds	2.13643	control1	control	7	0	0	Distal tubular cells_1
AACTCCCGTTGCGCAC_1	SeuratProject	24097	2826	GSM3823939_control.s1.dgecounts.rds	0.78848	control1	control	5	5	5	Epithelial cells
AACTCCCTCATCTGCC_1	SeuratProject	30988	3497	GSM3823939_control.s1.dgecounts.rds	1.07138	control1	control	7	0	0	Distal tubular cells_1
AACTCCCTCCTCCTAG_1	SeuratProject	8255	1192	GSM3823939_control.s1.dgecounts.rds	1.62326	control1	control	7	0	0	Distal tubular cells_1
AACTCCCTCCTTGACC_1	SeuratProject	7358	1138	GSM3823939_control.s1.dgecounts.rds	1.68524	control1	control	9	8	8	kidney endothelial cells
AACTCCCTCGAATGCT_1	SeuratProject	23820	2639	GSM3823939_control.s1.dgecounts.rds	0.646516	control1	control	7	0	0	Distal tubular cells_1
AACTCCCTCTGGTATG_1	SeuratProject	11176	1540	GSM3823939_control.s1.dgecounts.rds	1.33321	control1	control	7	0	0	Distal tubular cells_1
AACTCCCTCTTGACGA_1	SeuratProject	11370	1372	GSM3823939_control.s1.dgecounts.rds	0.826737	control1	control	7	0	0	Distal tubular cells_1
AACTCTTAGCGTGAAC_1	SeuratProject	24497	2647	GSM3823939_control.s1.dgecounts.rds	1.4859	control1	control	12	10	10	B cell
AACTCTTAGTAGATGT_1	SeuratProject	6312	971	GSM3823939_control.s1.dgecounts.rds	8.99873	control1	control	10	9	9	podocytes
AACTCTTCAAGCGATG_1	SeuratProject	14698	1810	GSM3823939_control.s1.dgecounts.rds	1.70772	control1	control	3	1	1	Proximal tubular cells
AACTCTTCACTGTCGG_1	SeuratProject	18164	2037	GSM3823939_control.s1.dgecounts.rds	11.0713	control1	control	4	4	4	Distal tubular cells_2
AACTCTTCAGCTCGAC_1	SeuratProject	28885	3170	GSM3823939_control.s1.dgecounts.rds	1.93872	control1	control	7	0	0	Distal tubular cells_1
AACTCTTGTAGGGACT_1	SeuratProject	11705	1670	GSM3823939_control.s1.dgecounts.rds	1.23879	control1	control	0	3	3	Intercalated cells
AACTCTTGTCTAAAGA_1	SeuratProject	24402	2231	GSM3823939_control.s1.dgecounts.rds	11.8925	control1	control	4	4	4	Distal tubular cells_2
AACTCTTTCACCTTAT_1	SeuratProject	6919	1041	GSM3823939_control.s1.dgecounts.rds	1.27186	control1	control	0	3	3	Intercalated cells
AACTCTTTCCCTCAGT_1	SeuratProject	16149	1900	GSM3823939_control.s1.dgecounts.rds	1.92582	control1	control	5	5	5	Epithelial cells
AACTCTTTCGGTCCGA_1	SeuratProject	12030	1734	GSM3823939_control.s1.dgecounts.rds	1.24688	control1	control	3	1	1	Proximal tubular cells
AACTGGTAGGATGTAT_1	SeuratProject	6818	878	GSM3823939_control.s1.dgecounts.rds	3.66676	control1	control	13	11	11	Fibroblasts_2
AACTGGTAGGTCATCT_1	SeuratProject	63409	4865	GSM3823939_control.s1.dgecounts.rds	1.46351	control1	control	10	9	9	podocytes
AACTGGTAGTCCGGTC_1	SeuratProject	12024	1513	GSM3823939_control.s1.dgecounts.rds	1.48037	control1	control	5	5	5	Epithelial cells
AACTGGTCACGTGAGA_1	SeuratProject	13299	1630	GSM3823939_control.s1.dgecounts.rds	1.06775	control1	control	5	5	5	Epithelial cells
AACTGGTCAGATGGGT_1	SeuratProject	11125	1633	GSM3823939_control.s1.dgecounts.rds	4.44045	control1	control	1	2	2	Collecting duct cells
AACTGGTTCATGTAGC_1	SeuratProject	8071	1087	GSM3823939_control.s1.dgecounts.rds	3.08512	control1	control	11	7	7	Fibroblasts_1
AACTGGTTCCTCTAGC_1	SeuratProject	26213	2587	GSM3823939_control.s1.dgecounts.rds	5.9398	control1	control	7	0	0	Distal tubular cells_1
AACTGGTTCGCCGTGA_1	SeuratProject	27301	2789	GSM3823939_control.s1.dgecounts.rds	0.769203	control1	control	0	3	3	Intercalated cells
AACTTTCAGTGTTGAA_1	SeuratProject	33151	3515	GSM3823939_control.s1.dgecounts.rds	9.00727	control1	control	5	5	5	Epithelial cells
AACTTTCAGTTTGCGT_1	SeuratProject	19533	2026	GSM3823939_control.s1.dgecounts.rds	12.6504	control1	control	4	4	4	Distal tubular cells_2
AACTTTCCAAGAGTCG_1	SeuratProject	11435	1467	GSM3823939_control.s1.dgecounts.rds	2.14254	control1	control	15	7	7	Fibroblasts_1
AACTTTCGTGGTAACG_1	SeuratProject	9245	1341	GSM3823939_control.s1.dgecounts.rds	0.540833	control1	control	3	1	1	Proximal tubular cells
AACTTTCGTGTGGTTT_1	SeuratProject	39751	4008	GSM3823939_control.s1.dgecounts.rds	4.55083	control1	control	4	4	4	Distal tubular cells_2
AACTTTCGTTAAGATG_1	SeuratProject	8287	1135	GSM3823939_control.s1.dgecounts.rds	2.03934	control1	control	11	7	7	Fibroblasts_1
AACTTTCTCCAAGTAC_1	SeuratProject	18292	2083	GSM3823939_control.s1.dgecounts.rds	0.710693	control1	control	3	1	1	Proximal tubular cells
AAGACCTAGTCCCACG_1	SeuratProject	22680	2237	GSM3823939_control.s1.dgecounts.rds	0.749559	control1	control	5	5	5	Epithelial cells
AAGACCTCACCGCTAG_1	SeuratProject	6911	993	GSM3823939_control.s1.dgecounts.rds	2.44538	control1	control	3	1	1	Proximal tubular cells
AAGACCTGTAGCCTCG_1	SeuratProject	9532	1143	GSM3823939_control.s1.dgecounts.rds	1.26941	control1	control	12	10	10	B cell
AAGACCTGTGGTCTCG_1	SeuratProject	14856	1715	GSM3823939_control.s1.dgecounts.rds	0.901992	control1	control	5	5	5	Epithelial cells
AAGACCTTCCCATTTA_1	SeuratProject	7368	1091	GSM3823939_control.s1.dgecounts.rds	2.59229	control1	control	3	1	1	Proximal tubular cells
AAGCCGCAGATCTGAA_1	SeuratProject	10596	1426	GSM3823939_control.s1.dgecounts.rds	6.13439	control1	control	10	9	9	podocytes
AAGCCGCAGGAGTCTG_1	SeuratProject	19574	2016	GSM3823939_control.s1.dgecounts.rds	1.08818	control1	control	0	3	3	Intercalated cells
AAGCCGCAGTGGTCCC_1	SeuratProject	7430	982	GSM3823939_control.s1.dgecounts.rds	0.942127	control1	control	0	3	3	Intercalated cells
AAGCCGCCACTATCTT_1	SeuratProject	19863	2152	GSM3823939_control.s1.dgecounts.rds	0.689725	control1	control	7	0	0	Distal tubular cells_1
AAGCCGCGTACGCACC_1	SeuratProject	11970	1436	GSM3823939_control.s1.dgecounts.rds	1.92982	control1	control	5	5	5	Epithelial cells
AAGCCGCGTGGTCCGT_1	SeuratProject	15669	1669	GSM3823939_control.s1.dgecounts.rds	1.47425	control1	control	5	5	5	Epithelial cells
AAGGAGCCACGACTCG_1	SeuratProject	9108	1155	GSM3823939_control.s1.dgecounts.rds	0.845411	control1	control	0	3	3	Intercalated cells
AAGGAGCCACGAGAGT_1	SeuratProject	18922	2174	GSM3823939_control.s1.dgecounts.rds	1.01998	control1	control	0	3	3	Intercalated cells
AAGGAGCCAGTAAGCG_1	SeuratProject	22114	2808	GSM3823939_control.s1.dgecounts.rds	2.43285	control1	control	9	8	8	kidney endothelial cells
AAGGAGCCATACTCTT_1	SeuratProject	14100	1816	GSM3823939_control.s1.dgecounts.rds	1.2766	control1	control	7	0	0	Distal tubular cells_1
AAGGAGCGTAAAGTCA_1	SeuratProject	16143	1952	GSM3823939_control.s1.dgecounts.rds	1.22034	control1	control	7	0	0	Distal tubular cells_1
AAGGAGCGTACCGTAT_1	SeuratProject	15438	1819	GSM3823939_control.s1.dgecounts.rds	0.343309	control1	control	3	1	1	Proximal tubular cells
AAGGAGCGTGGCGAAT_1	SeuratProject	11655	1504	GSM3823939_control.s1.dgecounts.rds	1.17546	control1	control	0	3	3	Intercalated cells
AAGGAGCGTTGCCTCT_1	SeuratProject	12188	1327	GSM3823939_control.s1.dgecounts.rds	16.5573	control1	control	4	4	4	Distal tubular cells_2
AAGGAGCTCACCGGGT_1	SeuratProject	22400	2116	GSM3823939_control.s1.dgecounts.rds	13.3839	control1	control	4	4	4	Distal tubular cells_2
AAGGAGCTCATGTGGT_1	SeuratProject	13069	1704	GSM3823939_control.s1.dgecounts.rds	2.17308	control1	control	7	0	0	Distal tubular cells_1
AAGGAGCTCCTTGGTC_1	SeuratProject	12049	1878	GSM3823939_control.s1.dgecounts.rds	0.805046	control1	control	0	3	3	Intercalated cells
AAGGAGCTCGCCTGTT_1	SeuratProject	12457	1345	GSM3823939_control.s1.dgecounts.rds	0.569961	control1	control	0	3	3	Intercalated cells
AAGGAGCTCGTCTGCT_1	SeuratProject	20072	2418	GSM3823939_control.s1.dgecounts.rds	0.428458	control1	control	3	1	1	Proximal tubular cells
AAGGCAGAGAGCTGGT_1	SeuratProject	21145	2394	GSM3823939_control.s1.dgecounts.rds	0.619532	control1	control	3	1	1	Proximal tubular cells
AAGGCAGCACATTCGA_1	SeuratProject	15753	1811	GSM3823939_control.s1.dgecounts.rds	10.4298	control1	control	7	0	0	Distal tubular cells_1
AAGGCAGCACGAGAGT_1	SeuratProject	8378	1089	GSM3823939_control.s1.dgecounts.rds	1.71879	control1	control	7	0	0	Distal tubular cells_1
AAGGCAGGTCTAGTCA_1	SeuratProject	18270	2419	GSM3823939_control.s1.dgecounts.rds	4.69075	control1	control	3	1	1	Proximal tubular cells
AAGGCAGGTCTCGTTC_1	SeuratProject	13922	1863	GSM3823939_control.s1.dgecounts.rds	0.617727	control1	control	11	7	7	Fibroblasts_1
AAGGCAGGTTGACGTT_1	SeuratProject	17754	1959	GSM3823939_control.s1.dgecounts.rds	2.16289	control1	control	12	10	10	B cell
AAGGTTCAGATGCCTT_1	SeuratProject	16117	1644	GSM3823939_control.s1.dgecounts.rds	1.22231	control1	control	0	3	3	Intercalated cells
AAGGTTCAGCTGGAAC_1	SeuratProject	21504	2500	GSM3823939_control.s1.dgecounts.rds	0.651042	control1	control	3	1	1	Proximal tubular cells
AAGGTTCAGTCAAGGC_1	SeuratProject	14717	1800	GSM3823939_control.s1.dgecounts.rds	1.23667	control1	control	7	0	0	Distal tubular cells_1
AAGGTTCAGTTCCACA_1	SeuratProject	41664	4051	GSM3823939_control.s1.dgecounts.rds	1.80972	control1	control	8	6	6	neutrophil
AAGGTTCCAGGGATTG_1	SeuratProject	31080	2665	GSM3823939_control.s1.dgecounts.rds	14.5946	control1	control	4	4	4	Distal tubular cells_2
AAGGTTCGTTCGGCAC_1	SeuratProject	10612	1373	GSM3823939_control.s1.dgecounts.rds	1.96005	control1	control	3	1	1	Proximal tubular cells
AAGGTTCTCAATCACG_1	SeuratProject	11441	1480	GSM3823939_control.s1.dgecounts.rds	1.28485	control1	control	1	2	2	Collecting duct cells
AAGGTTCTCACCCTCA_1	SeuratProject	16910	2123	GSM3823939_control.s1.dgecounts.rds	0.946186	control1	control	11	7	7	Fibroblasts_1
AAGGTTCTCATCGGAT_1	SeuratProject	21229	2673	GSM3823939_control.s1.dgecounts.rds	0.588817	control1	control	3	1	1	Proximal tubular cells
AAGGTTCTCCAAACTG_1	SeuratProject	73938	5516	GSM3823939_control.s1.dgecounts.rds	12.5984	control1	control	11	7	7	Fibroblasts_1
AAGGTTCTCGTTACAG_1	SeuratProject	13318	1670	GSM3823939_control.s1.dgecounts.rds	1.29899	control1	control	7	0	0	Distal tubular cells_1
AAGTCTGAGCTTCGCG_1	SeuratProject	13880	1698	GSM3823939_control.s1.dgecounts.rds	1.21758	control1	control	7	0	0	Distal tubular cells_1
AAGTCTGCACGGACAA_1	SeuratProject	12018	1794	GSM3823939_control.s1.dgecounts.rds	1.48943	control1	control	8	6	6	neutrophil
AAGTCTGCATGTAGTC_1	SeuratProject	13983	1897	GSM3823939_control.s1.dgecounts.rds	1.09419	control1	control	3	1	1	Proximal tubular cells
AAGTCTGGTACCGCTG_1	SeuratProject	18914	2121	GSM3823939_control.s1.dgecounts.rds	1.27419	control1	control	5	5	5	Epithelial cells
AATCCAGAGCGGCTTC_1	SeuratProject	12855	1763	GSM3823939_control.s1.dgecounts.rds	0.692338	control1	control	7	0	0	Distal tubular cells_1
AATCCAGCACATCTTT_1	SeuratProject	35102	3372	GSM3823939_control.s1.dgecounts.rds	0.985699	control1	control	10	9	9	podocytes
AATCCAGCACCGGAAA_1	SeuratProject	11581	1339	GSM3823939_control.s1.dgecounts.rds	22.96	control1	control	3	1	1	Proximal tubular cells
AATCCAGCACGAAACG_1	SeuratProject	18818	1964	GSM3823939_control.s1.dgecounts.rds	1.29132	control1	control	3	1	1	Proximal tubular cells
AATCCAGCATATGCTG_1	SeuratProject	13259	1717	GSM3823939_control.s1.dgecounts.rds	1.08605	control1	control	0	3	3	Intercalated cells
AATCCAGCATGACGGA_1	SeuratProject	45388	3929	GSM3823939_control.s1.dgecounts.rds	4.38442	control1	control	4	4	4	Distal tubular cells_2
AATCCAGGTCACCCAG_1	SeuratProject	8028	1188	GSM3823939_control.s1.dgecounts.rds	1.00897	control1	control	12	10	10	B cell
AATCCAGGTCTTGTCC_1	SeuratProject	12783	1525	GSM3823939_control.s1.dgecounts.rds	0.813581	control1	control	5	5	5	Epithelial cells
AATCCAGTCGCACTCT_1	SeuratProject	27997	2903	GSM3823939_control.s1.dgecounts.rds	0.5322	control1	control	12	10	10	B cell
AATCCAGTCGCCCTTA_1	SeuratProject	13671	1721	GSM3823939_control.s1.dgecounts.rds	0.694902	control1	control	7	0	0	Distal tubular cells_1
AATCGGTCAATCCGAT_1	SeuratProject	8326	1320	GSM3823939_control.s1.dgecounts.rds	2.02979	control1	control	3	1	1	Proximal tubular cells
AATCGGTCACATTTCT_1	SeuratProject	21494	2050	GSM3823939_control.s1.dgecounts.rds	29.7618	control1	control	4	4	4	Distal tubular cells_2
AATCGGTCAGTTCATG_1	SeuratProject	25175	2647	GSM3823939_control.s1.dgecounts.rds	1.1996	control1	control	0	3	3	Intercalated cells
AATCGGTGTCTTTCAT_1	SeuratProject	11357	1559	GSM3823939_control.s1.dgecounts.rds	1.56732	control1	control	3	1	1	Proximal tubular cells
AATCGGTTCGCTAGCG_1	SeuratProject	7705	1189	GSM3823939_control.s1.dgecounts.rds	1.72615	control1	control	3	1	1	Proximal tubular cells
AATCGGTTCTTTAGTC_1	SeuratProject	8915	1268	GSM3823939_control.s1.dgecounts.rds	1.30118	control1	control	0	3	3	Intercalated cells
ACACCAAAGACTTTCG_1	SeuratProject	11551	1458	GSM3823939_control.s1.dgecounts.rds	1.48905	control1	control	0	3	3	Intercalated cells
ACACCAAAGTTACCCA_1	SeuratProject	19400	1979	GSM3823939_control.s1.dgecounts.rds	1.13402	control1	control	0	3	3	Intercalated cells
ACACCAAAGTTAGGTA_1	SeuratProject	19617	1977	GSM3823939_control.s1.dgecounts.rds	0.718764	control1	control	0	3	3	Intercalated cells
ACACCAACAATGAAAC_1	SeuratProject	6877	738	GSM3823939_control.s1.dgecounts.rds	15.5009	control1	control	11	7	7	Fibroblasts_1
ACACCAACAGAGTGTG_1	SeuratProject	15753	1852	GSM3823939_control.s1.dgecounts.rds	0.438012	control1	control	7	0	0	Distal tubular cells_1
ACACCAAGTCGAGTTT_1	SeuratProject	20163	2034	GSM3823939_control.s1.dgecounts.rds	0.426524	control1	control	4	4	4	Distal tubular cells_2
ACACCAAGTGACCAAG_1	SeuratProject	24184	2422	GSM3823939_control.s1.dgecounts.rds	7.30235	control1	control	5	5	5	Epithelial cells
ACACCAAGTTCCGGCA_1	SeuratProject	20275	2321	GSM3823939_control.s1.dgecounts.rds	0.646116	control1	control	3	1	1	Proximal tubular cells
ACACCAATCAGCGACC_1	SeuratProject	11348	1219	GSM3823939_control.s1.dgecounts.rds	12.8128	control1	control	5	5	5	Epithelial cells
ACACCAATCATATCGG_1	SeuratProject	17332	2035	GSM3823939_control.s1.dgecounts.rds	2.11747	control1	control	7	0	0	Distal tubular cells_1
ACACCAATCCCAACGG_1	SeuratProject	7635	1112	GSM3823939_control.s1.dgecounts.rds	2.23969	control1	control	7	0	0	Distal tubular cells_1
ACACCCTAGAAACGAG_1	SeuratProject	9669	1107	GSM3823939_control.s1.dgecounts.rds	24.925	control1	control	7	0	0	Distal tubular cells_1
ACACCCTAGGACTGGT_1	SeuratProject	23621	2482	GSM3823939_control.s1.dgecounts.rds	0.651962	control1	control	7	0	0	Distal tubular cells_1
ACACCCTAGGGATGGG_1	SeuratProject	16447	2017	GSM3823939_control.s1.dgecounts.rds	0.839059	control1	control	7	0	0	Distal tubular cells_1
ACACCCTAGTTAACGA_1	SeuratProject	32477	3008	GSM3823939_control.s1.dgecounts.rds	9.39742	control1	control	4	4	4	Distal tubular cells_2
ACACCCTCAAACTGCT_1	SeuratProject	11542	1575	GSM3823939_control.s1.dgecounts.rds	1.99272	control1	control	11	7	7	Fibroblasts_1
ACACCCTCACGGTAAG_1	SeuratProject	30630	2578	GSM3823939_control.s1.dgecounts.rds	1.25041	control1	control	7	0	0	Distal tubular cells_1
ACACCCTCAGACAAAT_1	SeuratProject	20400	2489	GSM3823939_control.s1.dgecounts.rds	1.62745	control1	control	7	0	0	Distal tubular cells_1
ACACCCTCAGCCTGTG_1	SeuratProject	11272	1365	GSM3823939_control.s1.dgecounts.rds	4.5511	control1	control	5	5	5	Epithelial cells
ACACCCTTCAGTACGT_1	SeuratProject	19082	2227	GSM3823939_control.s1.dgecounts.rds	2.69888	control1	control	0	3	3	Intercalated cells
ACACCCTTCCTGCAGG_1	SeuratProject	12392	1622	GSM3823939_control.s1.dgecounts.rds	1.16204	control1	control	2	0	0	Distal tubular cells_1
ACACCCTTCTGACCTC_1	SeuratProject	17029	2135	GSM3823939_control.s1.dgecounts.rds	2.28434	control1	control	7	0	0	Distal tubular cells_1
ACACCCTTCTGCTTGC_1	SeuratProject	16597	2076	GSM3823939_control.s1.dgecounts.rds	1.45809	control1	control	0	3	3	Intercalated cells
ACACCCTTCTTCCTTC_1	SeuratProject	40852	3640	GSM3823939_control.s1.dgecounts.rds	2.17615	control1	control	5	5	5	Epithelial cells
ACACCCTTCTTGTCAT_1	SeuratProject	13698	1832	GSM3823939_control.s1.dgecounts.rds	5.65046	control1	control	11	7	7	Fibroblasts_1
ACACCGGAGAAACCAT_1	SeuratProject	13961	1648	GSM3823939_control.s1.dgecounts.rds	2.05573	control1	control	12	10	10	B cell
ACACCGGAGAACAATC_1	SeuratProject	13729	1661	GSM3823939_control.s1.dgecounts.rds	1.24554	control1	control	12	10	10	B cell
ACACCGGAGCGTGAAC_1	SeuratProject	26598	2726	GSM3823939_control.s1.dgecounts.rds	16.4599	control1	control	7	0	0	Distal tubular cells_1
ACACCGGAGGAGTACC_1	SeuratProject	17680	2224	GSM3823939_control.s1.dgecounts.rds	0.661765	control1	control	3	1	1	Proximal tubular cells
ACACCGGAGTATTGGA_1	SeuratProject	11861	1385	GSM3823939_control.s1.dgecounts.rds	1.05387	control1	control	12	10	10	B cell
ACACCGGGTCGAAAGC_1	SeuratProject	14020	1907	GSM3823939_control.s1.dgecounts.rds	0.791726	control1	control	3	1	1	Proximal tubular cells
ACACCGGTCACATGCA_1	SeuratProject	23447	2727	GSM3823939_control.s1.dgecounts.rds	0.806073	control1	control	8	6	6	neutrophil
ACACCGGTCCGCATAA_1	SeuratProject	11109	1344	GSM3823939_control.s1.dgecounts.rds	0.68413	control1	control	5	5	5	Epithelial cells
ACACTGAAGGCGACAT_1	SeuratProject	10768	1289	GSM3823939_control.s1.dgecounts.rds	1.58804	control1	control	5	5	5	Epithelial cells
ACACTGAAGTACGCCC_1	SeuratProject	15445	1898	GSM3823939_control.s1.dgecounts.rds	1.23017	control1	control	10	9	9	podocytes
ACACTGAGTACAGCAG_1	SeuratProject	7761	1201	GSM3823939_control.s1.dgecounts.rds	2.25486	control1	control	0	3	3	Intercalated cells
ACACTGAGTGTGGTTT_1	SeuratProject	21340	2320	GSM3823939_control.s1.dgecounts.rds	0.482662	control1	control	7	0	0	Distal tubular cells_1
ACACTGAGTTCAGCGC_1	SeuratProject	13497	1774	GSM3823939_control.s1.dgecounts.rds	1.40031	control1	control	7	0	0	Distal tubular cells_1
ACACTGATCAAACGGG_1	SeuratProject	12273	1727	GSM3823939_control.s1.dgecounts.rds	0.912572	control1	control	3	1	1	Proximal tubular cells
ACACTGATCTGGAGCC_1	SeuratProject	39387	3794	GSM3823939_control.s1.dgecounts.rds	5.43073	control1	control	4	4	4	Distal tubular cells_2
ACAGCCGAGAGTAATC_1	SeuratProject	16402	1857	GSM3823939_control.s1.dgecounts.rds	1.93879	control1	control	7	0	0	Distal tubular cells_1
ACAGCCGAGTACGATA_1	SeuratProject	35122	3493	GSM3823939_control.s1.dgecounts.rds	4.09715	control1	control	4	4	4	Distal tubular cells_2
ACAGCCGCAAGAAAGG_1	SeuratProject	12293	1523	GSM3823939_control.s1.dgecounts.rds	1.03311	control1	control	7	0	0	Distal tubular cells_1
ACAGCCGCAGTACACT_1	SeuratProject	17796	1996	GSM3823939_control.s1.dgecounts.rds	9.7269	control1	control	7	0	0	Distal tubular cells_1
ACAGCCGCATAACCTG_1	SeuratProject	10488	1390	GSM3823939_control.s1.dgecounts.rds	1.61137	control1	control	3	1	1	Proximal tubular cells
ACAGCCGCATGCCCGA_1	SeuratProject	14093	1903	GSM3823939_control.s1.dgecounts.rds	1.17079	control1	control	2	0	0	Distal tubular cells_1
ACAGCCGGTCAGAATA_1	SeuratProject	23686	2682	GSM3823939_control.s1.dgecounts.rds	5.70801	control1	control	3	1	1	Proximal tubular cells
ACAGCCGTCACTTATC_1	SeuratProject	13157	1805	GSM3823939_control.s1.dgecounts.rds	1.64171	control1	control	8	6	6	neutrophil
ACAGCCGTCTAAGCCA_1	SeuratProject	13761	1788	GSM3823939_control.s1.dgecounts.rds	1.56965	control1	control	7	0	0	Distal tubular cells_1
ACAGCCGTCTATCCCG_1	SeuratProject	13089	1522	GSM3823939_control.s1.dgecounts.rds	1.84124	control1	control	7	0	0	Distal tubular cells_1
ACAGCCGTCTTGTACT_1	SeuratProject	18776	2192	GSM3823939_control.s1.dgecounts.rds	10.1726	control1	control	4	4	4	Distal tubular cells_2
ACAGCTACAGCTGTGC_1	SeuratProject	11230	1289	GSM3823939_control.s1.dgecounts.rds	1.99466	control1	control	5	5	5	Epithelial cells
ACAGCTATCTGGTATG_1	SeuratProject	15483	1903	GSM3823939_control.s1.dgecounts.rds	2.75786	control1	control	7	0	0	Distal tubular cells_1
ACATACGAGAGAACAG_1	SeuratProject	15180	1936	GSM3823939_control.s1.dgecounts.rds	1.79842	control1	control	7	0	0	Distal tubular cells_1
ACATACGAGCCAGGAT_1	SeuratProject	16575	1958	GSM3823939_control.s1.dgecounts.rds	0.772247	control1	control	5	5	5	Epithelial cells
ACATACGAGGGAACGG_1	SeuratProject	23872	2834	GSM3823939_control.s1.dgecounts.rds	6.95794	control1	control	4	4	4	Distal tubular cells_2
ACATACGAGGTCGGAT_1	SeuratProject	9154	1249	GSM3823939_control.s1.dgecounts.rds	0.863011	control1	control	5	5	5	Epithelial cells
ACATACGGTTCACCTC_1	SeuratProject	12082	1465	GSM3823939_control.s1.dgecounts.rds	17.4723	control1	control	7	0	0	Distal tubular cells_1
ACATACGTCGCCATAA_1	SeuratProject	11014	1423	GSM3823939_control.s1.dgecounts.rds	1.08952	control1	control	0	3	3	Intercalated cells
ACATACGTCGCTGATA_1	SeuratProject	16791	2081	GSM3823939_control.s1.dgecounts.rds	0.756358	control1	control	0	3	3	Intercalated cells
ACATACGTCGTTTATC_1	SeuratProject	8577	1303	GSM3823939_control.s1.dgecounts.rds	1.72555	control1	control	0	3	3	Intercalated cells
ACATCAGAGCACGCCT_1	SeuratProject	8011	1164	GSM3823939_control.s1.dgecounts.rds	2.59643	control1	control	0	3	3	Intercalated cells
ACATCAGAGCAGGCTA_1	SeuratProject	7473	1169	GSM3823939_control.s1.dgecounts.rds	3.06437	control1	control	0	3	3	Intercalated cells
ACATCAGAGTAATCCC_1	SeuratProject	7810	1025	GSM3823939_control.s1.dgecounts.rds	3.03457	control1	control	11	7	7	Fibroblasts_1
ACATCAGCACAGAGGT_1	SeuratProject	7430	1157	GSM3823939_control.s1.dgecounts.rds	1.41319	control1	control	0	3	3	Intercalated cells
ACATCAGCACGAGAGT_1	SeuratProject	13512	1674	GSM3823939_control.s1.dgecounts.rds	1.63558	control1	control	7	0	0	Distal tubular cells_1
ACATCAGCATCACGAT_1	SeuratProject	22134	2650	GSM3823939_control.s1.dgecounts.rds	0.763531	control1	control	3	1	1	Proximal tubular cells
ACATCAGGTGTGAATA_1	SeuratProject	50883	4781	GSM3823939_control.s1.dgecounts.rds	0.485427	control1	control	7	0	0	Distal tubular cells_1
ACATCAGTCATGTCTT_1	SeuratProject	12742	1876	GSM3823939_control.s1.dgecounts.rds	2.75467	control1	control	7	0	0	Distal tubular cells_1
ACATGGTAGATTACCC_1	SeuratProject	10491	1323	GSM3823939_control.s1.dgecounts.rds	1.43933	control1	control	0	3	3	Intercalated cells
ACATGGTCAAACGTGG_1	SeuratProject	17984	1965	GSM3823939_control.s1.dgecounts.rds	8.10721	control1	control	4	4	4	Distal tubular cells_2
ACATGGTCAATCGGTT_1	SeuratProject	4951	827	GSM3823939_control.s1.dgecounts.rds	3.99919	control1	control	9	8	8	kidney endothelial cells
ACATGGTCACTACAGT_1	SeuratProject	10724	1458	GSM3823939_control.s1.dgecounts.rds	3.20776	control1	control	15	7	7	Fibroblasts_1
ACATGGTCAGCTTCGG_1	SeuratProject	17830	1953	GSM3823939_control.s1.dgecounts.rds	1.46943	control1	control	5	5	5	Epithelial cells
ACATGGTCATGCCCGA_1	SeuratProject	16982	2366	GSM3823939_control.s1.dgecounts.rds	0.924508	control1	control	0	3	3	Intercalated cells
ACATGGTGTCAAAGCG_1	SeuratProject	20670	2284	GSM3823939_control.s1.dgecounts.rds	1.00145	control1	control	0	3	3	Intercalated cells
ACATGGTGTGGTAACG_1	SeuratProject	11965	1539	GSM3823939_control.s1.dgecounts.rds	3.32637	control1	control	5	5	5	Epithelial cells
ACATGGTGTTTAGCTG_1	SeuratProject	12919	1789	GSM3823939_control.s1.dgecounts.rds	0.835978	control1	control	7	0	0	Distal tubular cells_1
ACATGGTTCAGTGCAT_1	SeuratProject	7687	1370	GSM3823939_control.s1.dgecounts.rds	5.63289	control1	control	6	1	1	Proximal tubular cells
ACATGGTTCCGAAGAG_1	SeuratProject	17616	2112	GSM3823939_control.s1.dgecounts.rds	1.12965	control1	control	5	5	5	Epithelial cells
ACCAGTAAGTGACTCT_1	SeuratProject	9434	1291	GSM3823939_control.s1.dgecounts.rds	1.35679	control1	control	3	1	1	Proximal tubular cells
ACCAGTACACCATCCT_1	SeuratProject	8060	1117	GSM3823939_control.s1.dgecounts.rds	3.0397	control1	control	12	10	10	B cell
ACCAGTACACGACGAA_1	SeuratProject	10469	1435	GSM3823939_control.s1.dgecounts.rds	2.17786	control1	control	3	1	1	Proximal tubular cells
ACCAGTAGTACAGTTC_1	SeuratProject	9692	1457	GSM3823939_control.s1.dgecounts.rds	2.76517	control1	control	3	1	1	Proximal tubular cells
ACCAGTAGTCAATGTC_1	SeuratProject	14882	1951	GSM3823939_control.s1.dgecounts.rds	0.927295	control1	control	0	3	3	Intercalated cells
ACCAGTAGTCGATTGT_1	SeuratProject	13244	1676	GSM3823939_control.s1.dgecounts.rds	1.2383	control1	control	7	0	0	Distal tubular cells_1
ACCAGTAGTTCGAATC_1	SeuratProject	6789	1144	GSM3823939_control.s1.dgecounts.rds	1.41405	control1	control	3	1	1	Proximal tubular cells
ACCAGTATCTATCGCC_1	SeuratProject	15994	2052	GSM3823939_control.s1.dgecounts.rds	0.937852	control1	control	3	1	1	Proximal tubular cells
ACCCACTAGCCGATTT_1	SeuratProject	7435	992	GSM3823939_control.s1.dgecounts.rds	1.38534	control1	control	9	8	8	kidney endothelial cells
ACCCACTAGTGAAGTT_1	SeuratProject	19098	2102	GSM3823939_control.s1.dgecounts.rds	1.1153	control1	control	0	3	3	Intercalated cells
ACCCACTCACTATCTT_1	SeuratProject	8913	1281	GSM3823939_control.s1.dgecounts.rds	1.02098	control1	control	0	3	3	Intercalated cells
ACCCACTTCACTGGGC_1	SeuratProject	13670	1780	GSM3823939_control.s1.dgecounts.rds	1.38259	control1	control	7	0	0	Distal tubular cells_1
ACCCACTTCAGTTAGC_1	SeuratProject	62610	5145	GSM3823939_control.s1.dgecounts.rds	1.43747	control1	control	5	5	5	Epithelial cells
ACCCACTTCCGTCATC_1	SeuratProject	17750	2217	GSM3823939_control.s1.dgecounts.rds	0.969014	control1	control	8	6	6	neutrophil
ACCCACTTCTGTCTAT_1	SeuratProject	10664	1444	GSM3823939_control.s1.dgecounts.rds	1.07839	control1	control	3	1	1	Proximal tubular cells
ACCGTAAAGACAAAGG_1	SeuratProject	13379	1696	GSM3823939_control.s1.dgecounts.rds	2.40676	control1	control	7	0	0	Distal tubular cells_1
ACCGTAAAGACAGAGA_1	SeuratProject	22525	2421	GSM3823939_control.s1.dgecounts.rds	10.7747	control1	control	4	4	4	Distal tubular cells_2
ACCGTAAAGAGTGAGA_1	SeuratProject	11734	1237	GSM3823939_control.s1.dgecounts.rds	7.92569	control1	control	4	4	4	Distal tubular cells_2
ACCGTAAAGATCTGAA_1	SeuratProject	14110	1738	GSM3823939_control.s1.dgecounts.rds	1.42452	control1	control	5	5	5	Epithelial cells
ACCGTAAAGATGAGAG_1	SeuratProject	8459	1125	GSM3823939_control.s1.dgecounts.rds	3.23915	control1	control	5	5	5	Epithelial cells
ACCGTAACAATACGCT_1	SeuratProject	11605	1474	GSM3823939_control.s1.dgecounts.rds	0.603188	control1	control	0	3	3	Intercalated cells
ACCGTAAGTAATCGTC_1	SeuratProject	18110	2393	GSM3823939_control.s1.dgecounts.rds	0.933186	control1	control	7	0	0	Distal tubular cells_1
ACCGTAAGTACGAAAT_1	SeuratProject	10356	1419	GSM3823939_control.s1.dgecounts.rds	1.79606	control1	control	3	1	1	Proximal tubular cells
ACCGTAAGTCTAGTCA_1	SeuratProject	11652	1673	GSM3823939_control.s1.dgecounts.rds	1.41607	control1	control	7	0	0	Distal tubular cells_1
ACCGTAAGTTAAGGGC_1	SeuratProject	12280	1531	GSM3823939_control.s1.dgecounts.rds	1.42508	control1	control	0	3	3	Intercalated cells
ACCGTAATCCTTTACA_1	SeuratProject	37312	3261	GSM3823939_control.s1.dgecounts.rds	0.348413	control1	control	0	3	3	Intercalated cells
ACCTTTAAGTGCGATG_1	SeuratProject	7362	932	GSM3823939_control.s1.dgecounts.rds	1.68432	control1	control	8	6	6	neutrophil
ACCTTTAAGTTGAGTA_1	SeuratProject	7774	1091	GSM3823939_control.s1.dgecounts.rds	8.97865	control1	control	3	1	1	Proximal tubular cells
ACCTTTAGTACCTACA_1	SeuratProject	12628	1458	GSM3823939_control.s1.dgecounts.rds	1.67089	control1	control	12	10	10	B cell
ACCTTTAGTTAGATGA_1	SeuratProject	25379	2812	GSM3823939_control.s1.dgecounts.rds	0.866858	control1	control	3	1	1	Proximal tubular cells
ACCTTTATCACAAACC_1	SeuratProject	30298	3144	GSM3823939_control.s1.dgecounts.rds	13.9811	control1	control	8	6	6	neutrophil
ACCTTTATCGACAGCC_1	SeuratProject	9504	1435	GSM3823939_control.s1.dgecounts.rds	0.547138	control1	control	3	1	1	Proximal tubular cells
ACCTTTATCTCGCTTG_1	SeuratProject	38306	3384	GSM3823939_control.s1.dgecounts.rds	12.4263	control1	control	4	4	4	Distal tubular cells_2
ACGAGCCAGCCTATGT_1	SeuratProject	11584	1439	GSM3823939_control.s1.dgecounts.rds	1.09634	control1	control	11	7	7	Fibroblasts_1
ACGAGCCCAATGCCAT_1	SeuratProject	9848	1273	GSM3823939_control.s1.dgecounts.rds	6.19415	control1	control	7	0	0	Distal tubular cells_1
ACGAGCCCAGACACTT_1	SeuratProject	9438	1261	GSM3823939_control.s1.dgecounts.rds	1.34562	control1	control	3	1	1	Proximal tubular cells
ACGAGCCGTAGCACGA_1	SeuratProject	12316	1606	GSM3823939_control.s1.dgecounts.rds	1.06366	control1	control	0	3	3	Intercalated cells
ACGAGCCGTCCAGTGC_1	SeuratProject	12146	1545	GSM3823939_control.s1.dgecounts.rds	1.39964	control1	control	4	4	4	Distal tubular cells_2
ACGAGCCTCCAAGTAC_1	SeuratProject	18742	2054	GSM3823939_control.s1.dgecounts.rds	0.378828	control1	control	0	3	3	Intercalated cells
ACGAGGAAGATCCCGC_1	SeuratProject	15406	1935	GSM3823939_control.s1.dgecounts.rds	2.75217	control1	control	0	3	3	Intercalated cells
ACGAGGACAATGGAGC_1	SeuratProject	14182	1476	GSM3823939_control.s1.dgecounts.rds	2.17177	control1	control	7	0	0	Distal tubular cells_1
ACGAGGACATGTTCCC_1	SeuratProject	21324	2190	GSM3823939_control.s1.dgecounts.rds	1.69762	control1	control	10	9	9	podocytes
ACGAGGACATTGAGCT_1	SeuratProject	19909	2225	GSM3823939_control.s1.dgecounts.rds	6.52971	control1	control	4	4	4	Distal tubular cells_2
ACGAGGAGTCGACTGC_1	SeuratProject	51579	4669	GSM3823939_control.s1.dgecounts.rds	3.38122	control1	control	4	4	4	Distal tubular cells_2
ACGAGGAGTTCAGGCC_1	SeuratProject	15825	1850	GSM3823939_control.s1.dgecounts.rds	0.543444	control1	control	3	1	1	Proximal tubular cells
ACGAGGAGTTCTGGTA_1	SeuratProject	13239	1659	GSM3823939_control.s1.dgecounts.rds	0.710023	control1	control	7	0	0	Distal tubular cells_1
ACGAGGATCCTTGCCA_1	SeuratProject	7830	1145	GSM3823939_control.s1.dgecounts.rds	2.84802	control1	control	7	0	0	Distal tubular cells_1
ACGATACAGGAGCGTT_1	SeuratProject	15478	1906	GSM3823939_control.s1.dgecounts.rds	0.807598	control1	control	0	3	3	Intercalated cells
ACGATACAGGTCATCT_1	SeuratProject	7414	1135	GSM3823939_control.s1.dgecounts.rds	1.82088	control1	control	4	4	4	Distal tubular cells_2
ACGATACCACAAGACG_1	SeuratProject	9043	1071	GSM3823939_control.s1.dgecounts.rds	1.90202	control1	control	13	11	11	Fibroblasts_2
ACGATACCACATGTGT_1	SeuratProject	14207	1919	GSM3823939_control.s1.dgecounts.rds	1.07693	control1	control	6	1	1	Proximal tubular cells
ACGATACGTAAGTAGT_1	SeuratProject	17298	2231	GSM3823939_control.s1.dgecounts.rds	2.42803	control1	control	7	0	0	Distal tubular cells_1
ACGATACGTACCGAGA_1	SeuratProject	12039	1632	GSM3823939_control.s1.dgecounts.rds	0.789102	control1	control	3	1	1	Proximal tubular cells
ACGATACGTTAAAGAC_1	SeuratProject	14117	1784	GSM3823939_control.s1.dgecounts.rds	2.28802	control1	control	3	1	1	Proximal tubular cells
ACGATACGTTCCTCCA_1	SeuratProject	14392	1846	GSM3823939_control.s1.dgecounts.rds	2.2582	control1	control	3	1	1	Proximal tubular cells
ACGATACTCAGGTTCA_1	SeuratProject	14888	1847	GSM3823939_control.s1.dgecounts.rds	1.73294	control1	control	7	0	0	Distal tubular cells_1
ACGATACTCAGTCAGT_1	SeuratProject	29965	3088	GSM3823939_control.s1.dgecounts.rds	2.07576	control1	control	10	9	9	podocytes
ACGATACTCCAGAAGG_1	SeuratProject	20146	2104	GSM3823939_control.s1.dgecounts.rds	10.6969	control1	control	5	5	5	Epithelial cells
ACGATACTCGATCCCT_1	SeuratProject	55290	4456	GSM3823939_control.s1.dgecounts.rds	4.57045	control1	control	4	4	4	Distal tubular cells_2
ACGATACTCGCGATCG_1	SeuratProject	14839	1785	GSM3823939_control.s1.dgecounts.rds	1.52301	control1	control	5	5	5	Epithelial cells
ACGATGTAGACTCGGA_1	SeuratProject	9011	1396	GSM3823939_control.s1.dgecounts.rds	1.27622	control1	control	3	1	1	Proximal tubular cells
ACGATGTCAATGGATA_1	SeuratProject	24099	2326	GSM3823939_control.s1.dgecounts.rds	7.84265	control1	control	7	0	0	Distal tubular cells_1
ACGATGTGTCGAACAG_1	SeuratProject	13797	1534	GSM3823939_control.s1.dgecounts.rds	1.24665	control1	control	5	5	5	Epithelial cells
ACGATGTGTCTCCACT_1	SeuratProject	9938	1418	GSM3823939_control.s1.dgecounts.rds	1.29805	control1	control	5	5	5	Epithelial cells
ACGATGTGTCTGATTG_1	SeuratProject	14883	1946	GSM3823939_control.s1.dgecounts.rds	1.9015	control1	control	7	0	0	Distal tubular cells_1
ACGATGTGTTAAGGGC_1	SeuratProject	13825	1511	GSM3823939_control.s1.dgecounts.rds	1.25136	control1	control	5	5	5	Epithelial cells
ACGATGTGTTCTGTTT_1	SeuratProject	9245	1403	GSM3823939_control.s1.dgecounts.rds	0.713899	control1	control	7	0	0	Distal tubular cells_1
ACGATGTTCGTCGTTC_1	SeuratProject	18832	2469	GSM3823939_control.s1.dgecounts.rds	0.992991	control1	control	3	1	1	Proximal tubular cells
ACGCAGCAGCGAAGGG_1	SeuratProject	11468	1418	GSM3823939_control.s1.dgecounts.rds	1.36903	control1	control	5	5	5	Epithelial cells
ACGCAGCCATCACAAC_1	SeuratProject	20893	2437	GSM3823939_control.s1.dgecounts.rds	0.899823	control1	control	3	1	1	Proximal tubular cells
ACGCAGCGTCCCTACT_1	SeuratProject	13135	1670	GSM3823939_control.s1.dgecounts.rds	1.85002	control1	control	7	0	0	Distal tubular cells_1
ACGCAGCGTGGCAAAC_1	SeuratProject	9708	1390	GSM3823939_control.s1.dgecounts.rds	3.24475	control1	control	7	0	0	Distal tubular cells_1
ACGCAGCTCCCTGACT_1	SeuratProject	22074	2630	GSM3823939_control.s1.dgecounts.rds	3.32971	control1	control	6	1	1	Proximal tubular cells
ACGCCAGAGGAGTTTA_1	SeuratProject	22277	2353	GSM3823939_control.s1.dgecounts.rds	0.601517	control1	control	7	0	0	Distal tubular cells_1
ACGCCAGCAAGGACAC_1	SeuratProject	15397	1655	GSM3823939_control.s1.dgecounts.rds	0.688446	control1	control	0	3	3	Intercalated cells
ACGCCAGCAGACACTT_1	SeuratProject	22987	1792	GSM3823939_control.s1.dgecounts.rds	9.80989	control1	control	4	4	4	Distal tubular cells_2
ACGCCAGGTGAGCGAT_1	SeuratProject	17268	2119	GSM3823939_control.s1.dgecounts.rds	1.04818	control1	control	8	6	6	neutrophil
ACGCCAGTCTAACTCT_1	SeuratProject	8570	1158	GSM3823939_control.s1.dgecounts.rds	1.54026	control1	control	3	1	1	Proximal tubular cells
ACGCCGAAGCTATGCT_1	SeuratProject	16937	1905	GSM3823939_control.s1.dgecounts.rds	1.65319	control1	control	7	0	0	Distal tubular cells_1
ACGCCGAAGGCTAGGT_1	SeuratProject	23634	2620	GSM3823939_control.s1.dgecounts.rds	1.01972	control1	control	3	1	1	Proximal tubular cells
ACGCCGAAGTGTTGAA_1	SeuratProject	19704	2335	GSM3823939_control.s1.dgecounts.rds	1.22818	control1	control	0	3	3	Intercalated cells
ACGCCGAGTCTTTCAT_1	SeuratProject	13411	1719	GSM3823939_control.s1.dgecounts.rds	1.94616	control1	control	8	6	6	neutrophil
ACGCCGATCCAGTATG_1	SeuratProject	17087	2144	GSM3823939_control.s1.dgecounts.rds	2.71551	control1	control	7	0	0	Distal tubular cells_1
ACGCCGATCTACGAGT_1	SeuratProject	11997	1391	GSM3823939_control.s1.dgecounts.rds	2.42561	control1	control	12	10	10	B cell
ACGGAGACATGTAAGA_1	SeuratProject	6698	912	GSM3823939_control.s1.dgecounts.rds	1.98567	control1	control	12	10	10	B cell
ACGGAGAGTAAGCACG_1	SeuratProject	12460	1284	GSM3823939_control.s1.dgecounts.rds	1.09952	control1	control	13	11	11	Fibroblasts_2
ACGGAGAGTACTCTCC_1	SeuratProject	12494	1540	GSM3823939_control.s1.dgecounts.rds	0.880423	control1	control	5	5	5	Epithelial cells
ACGGAGAGTGATAAAC_1	SeuratProject	24366	2099	GSM3823939_control.s1.dgecounts.rds	15.969	control1	control	4	4	4	Distal tubular cells_2
ACGGAGAGTGGTAACG_1	SeuratProject	12949	1571	GSM3823939_control.s1.dgecounts.rds	0.926712	control1	control	0	3	3	Intercalated cells
ACGGAGATCCAAGTAC_1	SeuratProject	8672	1141	GSM3823939_control.s1.dgecounts.rds	0.945572	control1	control	7	0	0	Distal tubular cells_1
ACGGAGATCCAGTAGT_1	SeuratProject	14270	1835	GSM3823939_control.s1.dgecounts.rds	1.34548	control1	control	0	3	3	Intercalated cells
ACGGAGATCTGCAAGT_1	SeuratProject	13959	1694	GSM3823939_control.s1.dgecounts.rds	0.680565	control1	control	0	3	3	Intercalated cells
ACGGCCAAGCCCAACC_1	SeuratProject	26171	2727	GSM3823939_control.s1.dgecounts.rds	0.546406	control1	control	3	1	1	Proximal tubular cells
ACGGCCAAGTCATGCT_1	SeuratProject	34564	3667	GSM3823939_control.s1.dgecounts.rds	0.494734	control1	control	7	0	0	Distal tubular cells_1
ACGGCCAAGTGACATA_1	SeuratProject	10770	1257	GSM3823939_control.s1.dgecounts.rds	1.1792	control1	control	5	5	5	Epithelial cells
ACGGCCACATACGCTA_1	SeuratProject	8262	910	GSM3823939_control.s1.dgecounts.rds	15.6984	control1	control	4	4	4	Distal tubular cells_2
ACGGCCAGTATGGTTC_1	SeuratProject	7191	1035	GSM3823939_control.s1.dgecounts.rds	0.82047	control1	control	7	0	0	Distal tubular cells_1
ACGGGCTAGCCACGTC_1	SeuratProject	17569	1909	GSM3823939_control.s1.dgecounts.rds	2.34504	control1	control	12	10	10	B cell
ACGGGCTAGGACAGAA_1	SeuratProject	39221	3833	GSM3823939_control.s1.dgecounts.rds	1.19579	control1	control	0	3	3	Intercalated cells
ACGGGCTAGGCGATAC_1	SeuratProject	34173	2351	GSM3823939_control.s1.dgecounts.rds	43.1071	control1	control	7	0	0	Distal tubular cells_1
ACGGGCTAGTGTGAAT_1	SeuratProject	6687	944	GSM3823939_control.s1.dgecounts.rds	4.65082	control1	control	12	10	10	B cell
ACGGGCTCACGGCTAC_1	SeuratProject	9016	1209	GSM3823939_control.s1.dgecounts.rds	22.2493	control1	control	7	0	0	Distal tubular cells_1
ACGGGCTCACTGCCAG_1	SeuratProject	12584	1769	GSM3823939_control.s1.dgecounts.rds	5.68976	control1	control	7	0	0	Distal tubular cells_1
ACGGGCTCAGTATAAG_1	SeuratProject	12199	1478	GSM3823939_control.s1.dgecounts.rds	12.4272	control1	control	4	4	4	Distal tubular cells_2
ACGGGCTCAGTCACTA_1	SeuratProject	17287	1964	GSM3823939_control.s1.dgecounts.rds	4.836	control1	control	8	6	6	neutrophil
ACGGGCTGTCGTGGCT_1	SeuratProject	11180	1593	GSM3823939_control.s1.dgecounts.rds	1.93202	control1	control	3	1	1	Proximal tubular cells
ACGGGCTTCCTTTCTC_1	SeuratProject	11049	1486	GSM3823939_control.s1.dgecounts.rds	4.04561	control1	control	11	7	7	Fibroblasts_1
ACGGGCTTCTCCAGGG_1	SeuratProject	13591	1496	GSM3823939_control.s1.dgecounts.rds	3.25215	control1	control	7	0	0	Distal tubular cells_1
ACGGGTCAGAATTCCC_1	SeuratProject	12888	1488	GSM3823939_control.s1.dgecounts.rds	1.26474	control1	control	10	9	9	podocytes
ACGGGTCAGGCTAGCA_1	SeuratProject	13954	1463	GSM3823939_control.s1.dgecounts.rds	20.5891	control1	control	7	0	0	Distal tubular cells_1
ACGGGTCGTCCGACGT_1	SeuratProject	22302	2118	GSM3823939_control.s1.dgecounts.rds	13.3531	control1	control	4	4	4	Distal tubular cells_2
ACGGGTCTCAACCATG_1	SeuratProject	7175	904	GSM3823939_control.s1.dgecounts.rds	1.67247	control1	control	5	5	5	Epithelial cells
ACGTCAAAGACACGAC_1	SeuratProject	15256	1775	GSM3823939_control.s1.dgecounts.rds	0.904562	control1	control	5	5	5	Epithelial cells
ACGTCAAAGGGAAACA_1	SeuratProject	19764	2206	GSM3823939_control.s1.dgecounts.rds	0.814612	control1	control	0	3	3	Intercalated cells
ACGTCAAAGTAAGTAC_1	SeuratProject	7462	1190	GSM3823939_control.s1.dgecounts.rds	1.03189	control1	control	7	0	0	Distal tubular cells_1
ACGTCAAAGTCGATAA_1	SeuratProject	12573	1643	GSM3823939_control.s1.dgecounts.rds	0.771494	control1	control	0	3	3	Intercalated cells
ACGTCAACAGGAATGC_1	SeuratProject	17058	1797	GSM3823939_control.s1.dgecounts.rds	1.67077	control1	control	0	3	3	Intercalated cells
ACGTCAAGTAGATTAG_1	SeuratProject	9219	1039	GSM3823939_control.s1.dgecounts.rds	1.89825	control1	control	1	2	2	Collecting duct cells
ACGTCAAGTAGCGTCC_1	SeuratProject	17427	2178	GSM3823939_control.s1.dgecounts.rds	3.94216	control1	control	7	0	0	Distal tubular cells_1
ACGTCAATCCATTCTA_1	SeuratProject	19612	2437	GSM3823939_control.s1.dgecounts.rds	1.07587	control1	control	7	0	0	Distal tubular cells_1
ACGTCAATCCTATGTT_1	SeuratProject	58825	5097	GSM3823939_control.s1.dgecounts.rds	2.46324	control1	control	5	5	5	Epithelial cells
ACTATCTAGAGCTGGT_1	SeuratProject	19110	2343	GSM3823939_control.s1.dgecounts.rds	1.03611	control1	control	5	5	5	Epithelial cells
ACTATCTAGTACCGGA_1	SeuratProject	23193	2485	GSM3823939_control.s1.dgecounts.rds	3.67783	control1	control	5	5	5	Epithelial cells
ACTATCTCAAATTGCC_1	SeuratProject	17775	1935	GSM3823939_control.s1.dgecounts.rds	7.51055	control1	control	4	4	4	Distal tubular cells_2
ACTATCTCACCCTATC_1	SeuratProject	9467	1432	GSM3823939_control.s1.dgecounts.rds	2.63019	control1	control	11	7	7	Fibroblasts_1
ACTATCTCACGACTCG_1	SeuratProject	6615	910	GSM3823939_control.s1.dgecounts.rds	1.43613	control1	control	7	0	0	Distal tubular cells_1
ACTATCTCAGGGATTG_1	SeuratProject	15646	2028	GSM3823939_control.s1.dgecounts.rds	0.913972	control1	control	3	1	1	Proximal tubular cells
ACTATCTCATGCCTAA_1	SeuratProject	18286	1879	GSM3823939_control.s1.dgecounts.rds	10.7241	control1	control	4	4	4	Distal tubular cells_2
ACTATCTGTAAGGATT_1	SeuratProject	7310	1112	GSM3823939_control.s1.dgecounts.rds	2.74966	control1	control	3	1	1	Proximal tubular cells
ACTATCTGTTATCGGT_1	SeuratProject	23741	2525	GSM3823939_control.s1.dgecounts.rds	5.9433	control1	control	4	4	4	Distal tubular cells_2
ACTATCTGTTCTGGTA_1	SeuratProject	15906	1894	GSM3823939_control.s1.dgecounts.rds	17.3834	control1	control	0	3	3	Intercalated cells
ACTATCTTCAACACAC_1	SeuratProject	7597	1285	GSM3823939_control.s1.dgecounts.rds	2.94853	control1	control	8	6	6	neutrophil
ACTATCTTCCCATTAT_1	SeuratProject	7356	1062	GSM3823939_control.s1.dgecounts.rds	1.25068	control1	control	3	1	1	Proximal tubular cells
ACTGAACAGCGATTCT_1	SeuratProject	9138	1183	GSM3823939_control.s1.dgecounts.rds	0.722259	control1	control	5	5	5	Epithelial cells
ACTGAACAGGTCGGAT_1	SeuratProject	6377	1113	GSM3823939_control.s1.dgecounts.rds	4.23397	control1	control	3	1	1	Proximal tubular cells
ACTGAACCACATTAGC_1	SeuratProject	19317	2032	GSM3823939_control.s1.dgecounts.rds	0.693689	control1	control	0	3	3	Intercalated cells
ACTGAACCATCGGGTC_1	SeuratProject	17080	2256	GSM3823939_control.s1.dgecounts.rds	0.825527	control1	control	3	1	1	Proximal tubular cells
ACTGAACGTGCAGACA_1	SeuratProject	13819	1688	GSM3823939_control.s1.dgecounts.rds	1.18677	control1	control	7	0	0	Distal tubular cells_1
ACTGAACGTTCACCTC_1	SeuratProject	14141	1907	GSM3823939_control.s1.dgecounts.rds	2.25585	control1	control	3	1	1	Proximal tubular cells
ACTGAACTCACCACCT_1	SeuratProject	8824	1262	GSM3823939_control.s1.dgecounts.rds	1.57525	control1	control	2	0	0	Distal tubular cells_1
ACTGAGTAGAGGGATA_1	SeuratProject	26158	2146	GSM3823939_control.s1.dgecounts.rds	26.7528	control1	control	7	0	0	Distal tubular cells_1
ACTGAGTAGCAATATG_1	SeuratProject	7047	1097	GSM3823939_control.s1.dgecounts.rds	3.67532	control1	control	3	1	1	Proximal tubular cells
ACTGAGTAGCGATTCT_1	SeuratProject	26125	2872	GSM3823939_control.s1.dgecounts.rds	1.5311	control1	control	4	4	4	Distal tubular cells_2
ACTGAGTAGTGAACAT_1	SeuratProject	29302	3099	GSM3823939_control.s1.dgecounts.rds	10.3304	control1	control	11	7	7	Fibroblasts_1
ACTGAGTCACGTAAGG_1	SeuratProject	14681	1885	GSM3823939_control.s1.dgecounts.rds	1.60071	control1	control	7	0	0	Distal tubular cells_1
ACTGAGTGTATCACCA_1	SeuratProject	15298	1815	GSM3823939_control.s1.dgecounts.rds	1.25507	control1	control	10	9	9	podocytes
ACTGAGTGTATTCGTG_1	SeuratProject	8313	1071	GSM3823939_control.s1.dgecounts.rds	1.79237	control1	control	11	7	7	Fibroblasts_1
ACTGAGTGTCGCATCG_1	SeuratProject	10553	1504	GSM3823939_control.s1.dgecounts.rds	1.03288	control1	control	7	0	0	Distal tubular cells_1
ACTGAGTTCAAACCGT_1	SeuratProject	17950	2244	GSM3823939_control.s1.dgecounts.rds	1.08078	control1	control	7	0	0	Distal tubular cells_1
ACTGAGTTCTGTTGAG_1	SeuratProject	14447	1422	GSM3823939_control.s1.dgecounts.rds	30.823	control1	control	4	4	4	Distal tubular cells_2
ACTGATGAGATCACGG_1	SeuratProject	16424	2118	GSM3823939_control.s1.dgecounts.rds	0.834145	control1	control	7	0	0	Distal tubular cells_1
ACTGATGCATGCGCAC_1	SeuratProject	12100	1576	GSM3823939_control.s1.dgecounts.rds	1.09917	control1	control	7	0	0	Distal tubular cells_1
ACTGATGCATTGGCGC_1	SeuratProject	11938	1667	GSM3823939_control.s1.dgecounts.rds	1.06383	control1	control	3	1	1	Proximal tubular cells
ACTGATGGTGACTCAT_1	SeuratProject	16430	1764	GSM3823939_control.s1.dgecounts.rds	10.3774	control1	control	5	5	5	Epithelial cells
ACTGATGTCAGCTCGG_1	SeuratProject	15867	1839	GSM3823939_control.s1.dgecounts.rds	1.46846	control1	control	5	5	5	Epithelial cells
ACTGATGTCAGGCGAA_1	SeuratProject	18552	1943	GSM3823939_control.s1.dgecounts.rds	12.6887	control1	control	7	0	0	Distal tubular cells_1
ACTGATGTCTTGACGA_1	SeuratProject	23031	2569	GSM3823939_control.s1.dgecounts.rds	0.551431	control1	control	3	1	1	Proximal tubular cells
ACTGCTCAGCGGATCA_1	SeuratProject	20363	2143	GSM3823939_control.s1.dgecounts.rds	0.687521	control1	control	2	0	0	Distal tubular cells_1
ACTGCTCAGGTGCTAG_1	SeuratProject	12194	1353	GSM3823939_control.s1.dgecounts.rds	1.86977	control1	control	5	5	5	Epithelial cells
ACTGCTCCACTATCTT_1	SeuratProject	9452	1252	GSM3823939_control.s1.dgecounts.rds	3.29031	control1	control	9	8	8	kidney endothelial cells
ACTGCTCCATGGGAAC_1	SeuratProject	8526	1308	GSM3823939_control.s1.dgecounts.rds	2.38095	control1	control	7	0	0	Distal tubular cells_1
ACTGCTCGTGGTAACG_1	SeuratProject	7121	889	GSM3823939_control.s1.dgecounts.rds	4.17076	control1	control	5	5	5	Epithelial cells
ACTGCTCGTTTACTCT_1	SeuratProject	17129	2055	GSM3823939_control.s1.dgecounts.rds	0.68889	control1	control	7	0	0	Distal tubular cells_1
ACTGCTCTCAACGGGA_1	SeuratProject	21116	2281	GSM3823939_control.s1.dgecounts.rds	0.904527	control1	control	0	3	3	Intercalated cells
ACTGCTCTCACGACTA_1	SeuratProject	15931	1911	GSM3823939_control.s1.dgecounts.rds	0.991777	control1	control	0	3	3	Intercalated cells
ACTGCTCTCGTCTGCT_1	SeuratProject	15198	1970	GSM3823939_control.s1.dgecounts.rds	0.940913	control1	control	0	3	3	Intercalated cells
ACTGCTCTCTTTAGGG_1	SeuratProject	12188	1621	GSM3823939_control.s1.dgecounts.rds	1.69839	control1	control	11	7	7	Fibroblasts_1
ACTGTCCGTCAACATC_1	SeuratProject	13737	1735	GSM3823939_control.s1.dgecounts.rds	3.69804	control1	control	5	5	5	Epithelial cells
ACTTACTAGAACAATC_1	SeuratProject	12289	1600	GSM3823939_control.s1.dgecounts.rds	1.896	control1	control	0	3	3	Intercalated cells
ACTTACTAGATAGGAG_1	SeuratProject	31870	3652	GSM3823939_control.s1.dgecounts.rds	4.74427	control1	control	3	1	1	Proximal tubular cells
ACTTACTCAAGAAAGG_1	SeuratProject	17274	1948	GSM3823939_control.s1.dgecounts.rds	2.31562	control1	control	5	5	5	Epithelial cells
ACTTACTCAAGCTGAG_1	SeuratProject	11323	1539	GSM3823939_control.s1.dgecounts.rds	1.48371	control1	control	0	3	3	Intercalated cells
ACTTACTGTTATTCTC_1	SeuratProject	30271	3247	GSM3823939_control.s1.dgecounts.rds	0.809355	control1	control	12	10	10	B cell
ACTTACTTCCAGATCA_1	SeuratProject	16634	2073	GSM3823939_control.s1.dgecounts.rds	0.414813	control1	control	7	0	0	Distal tubular cells_1
ACTTGTTAGCTCCCAG_1	SeuratProject	13981	1979	GSM3823939_control.s1.dgecounts.rds	1.34468	control1	control	7	0	0	Distal tubular cells_1
ACTTGTTAGGTGTTAA_1	SeuratProject	10094	1306	GSM3823939_control.s1.dgecounts.rds	5.97385	control1	control	0	3	3	Intercalated cells
ACTTGTTCAGCATACT_1	SeuratProject	9835	1431	GSM3823939_control.s1.dgecounts.rds	2.24708	control1	control	7	0	0	Distal tubular cells_1
ACTTGTTCAGGAATCG_1	SeuratProject	69409	5373	GSM3823939_control.s1.dgecounts.rds	9.4858	control1	control	4	4	4	Distal tubular cells_2
ACTTGTTCAGTGACAG_1	SeuratProject	39729	3386	GSM3823939_control.s1.dgecounts.rds	5.55514	control1	control	5	5	5	Epithelial cells
ACTTGTTTCAGATAAG_1	SeuratProject	14656	1844	GSM3823939_control.s1.dgecounts.rds	1.52838	control1	control	0	3	3	Intercalated cells
ACTTTCAAGCATCATC_1	SeuratProject	13897	1596	GSM3823939_control.s1.dgecounts.rds	0.949845	control1	control	0	3	3	Intercalated cells
ACTTTCACAATAAGCA_1	SeuratProject	10363	1229	GSM3823939_control.s1.dgecounts.rds	2.42208	control1	control	5	5	5	Epithelial cells
ACTTTCAGTCTCATCC_1	SeuratProject	22865	2649	GSM3823939_control.s1.dgecounts.rds	0.428603	control1	control	3	1	1	Proximal tubular cells
ACTTTCATCAACGGCC_1	SeuratProject	14376	1891	GSM3823939_control.s1.dgecounts.rds	1.27295	control1	control	7	0	0	Distal tubular cells_1
ACTTTCATCCGAGCCA_1	SeuratProject	11566	1384	GSM3823939_control.s1.dgecounts.rds	0.907833	control1	control	12	10	10	B cell
ACTTTCATCGATGAGG_1	SeuratProject	12860	1661	GSM3823939_control.s1.dgecounts.rds	0.948678	control1	control	5	5	5	Epithelial cells
ACTTTCATCGTCTGCT_1	SeuratProject	11376	1491	GSM3823939_control.s1.dgecounts.rds	1.05485	control1	control	0	3	3	Intercalated cells
AGAATAGAGACACGAC_1	SeuratProject	10811	1292	GSM3823939_control.s1.dgecounts.rds	1.02673	control1	control	5	5	5	Epithelial cells
AGAATAGAGACAGAGA_1	SeuratProject	14734	1932	GSM3823939_control.s1.dgecounts.rds	0.624406	control1	control	7	0	0	Distal tubular cells_1
AGAATAGAGGTAAACT_1	SeuratProject	9301	1205	GSM3823939_control.s1.dgecounts.rds	2.05354	control1	control	12	10	10	B cell
AGAATAGCACAGAGGT_1	SeuratProject	13959	1493	GSM3823939_control.s1.dgecounts.rds	1.23218	control1	control	5	5	5	Epithelial cells
AGAATAGCACATCCAA_1	SeuratProject	31056	3244	GSM3823939_control.s1.dgecounts.rds	3.88975	control1	control	4	4	4	Distal tubular cells_2
AGAATAGGTACTTAGC_1	SeuratProject	14811	1929	GSM3823939_control.s1.dgecounts.rds	0.762946	control1	control	7	0	0	Distal tubular cells_1
AGAATAGTCACGCATA_1	SeuratProject	19840	2277	GSM3823939_control.s1.dgecounts.rds	0.498992	control1	control	7	0	0	Distal tubular cells_1
AGAATAGTCCCACTTG_1	SeuratProject	11445	1408	GSM3823939_control.s1.dgecounts.rds	1.52031	control1	control	5	5	5	Epithelial cells
AGAATAGTCGTCCAGG_1	SeuratProject	23504	2583	GSM3823939_control.s1.dgecounts.rds	5.99472	control1	control	10	9	9	podocytes
AGACGTTAGACCCACC_1	SeuratProject	16061	1835	GSM3823939_control.s1.dgecounts.rds	0.56659	control1	control	7	0	0	Distal tubular cells_1
AGACGTTAGGGTGTTG_1	SeuratProject	11262	1717	GSM3823939_control.s1.dgecounts.rds	0.834665	control1	control	3	1	1	Proximal tubular cells
AGACGTTAGTTCGCGC_1	SeuratProject	10059	1474	GSM3823939_control.s1.dgecounts.rds	1.69003	control1	control	3	1	1	Proximal tubular cells
AGACGTTCATGACATC_1	SeuratProject	12379	1749	GSM3823939_control.s1.dgecounts.rds	1.53486	control1	control	3	1	1	Proximal tubular cells
AGACGTTCATGGGACA_1	SeuratProject	30846	3179	GSM3823939_control.s1.dgecounts.rds	0.567334	control1	control	3	1	1	Proximal tubular cells
AGACGTTGTAAGTGGC_1	SeuratProject	12416	1619	GSM3823939_control.s1.dgecounts.rds	2.48067	control1	control	5	5	5	Epithelial cells
AGACGTTTCGCATGAT_1	SeuratProject	12317	1448	GSM3823939_control.s1.dgecounts.rds	1.34773	control1	control	12	10	10	B cell
AGAGCGAAGAGGGATA_1	SeuratProject	23640	3059	GSM3823939_control.s1.dgecounts.rds	3.13875	control1	control	7	0	0	Distal tubular cells_1
AGAGCGACATTATCTC_1	SeuratProject	9329	1245	GSM3823939_control.s1.dgecounts.rds	0.86826	control1	control	5	5	5	Epithelial cells
AGAGCGAGTACCGAGA_1	SeuratProject	10583	1347	GSM3823939_control.s1.dgecounts.rds	1.49296	control1	control	5	5	5	Epithelial cells
AGAGCGATCATTCACT_1	SeuratProject	9283	1231	GSM3823939_control.s1.dgecounts.rds	0.646343	control1	control	7	0	0	Distal tubular cells_1
AGAGCGATCTCTTGAT_1	SeuratProject	9251	1392	GSM3823939_control.s1.dgecounts.rds	2.86456	control1	control	0	3	3	Intercalated cells
AGAGCTTAGCCACCTG_1	SeuratProject	5749	850	GSM3823939_control.s1.dgecounts.rds	3.80936	control1	control	9	8	8	kidney endothelial cells
AGAGCTTAGCGATAGC_1	SeuratProject	13455	1528	GSM3823939_control.s1.dgecounts.rds	1.51616	control1	control	0	3	3	Intercalated cells
AGAGCTTAGGCACATG_1	SeuratProject	16147	1823	GSM3823939_control.s1.dgecounts.rds	1.38106	control1	control	0	3	3	Intercalated cells
AGAGCTTCATCTCCCA_1	SeuratProject	14434	1656	GSM3823939_control.s1.dgecounts.rds	0.921435	control1	control	12	10	10	B cell
AGAGCTTCATGGTCAT_1	SeuratProject	11610	1429	GSM3823939_control.s1.dgecounts.rds	4.34109	control1	control	0	3	3	Intercalated cells
AGAGCTTCATTCCTGC_1	SeuratProject	21036	2263	GSM3823939_control.s1.dgecounts.rds	4.02168	control1	control	10	9	9	podocytes
AGAGCTTGTCTAGTGT_1	SeuratProject	13477	1834	GSM3823939_control.s1.dgecounts.rds	1.73629	control1	control	7	0	0	Distal tubular cells_1
AGAGTGGAGACAGAGA_1	SeuratProject	12054	1691	GSM3823939_control.s1.dgecounts.rds	2.09059	control1	control	7	0	0	Distal tubular cells_1
AGAGTGGAGTCTCCTC_1	SeuratProject	7507	1046	GSM3823939_control.s1.dgecounts.rds	1.95817	control1	control	0	3	3	Intercalated cells
AGAGTGGAGTGATCGG_1	SeuratProject	8839	956	GSM3823939_control.s1.dgecounts.rds	21.9256	control1	control	0	3	3	Intercalated cells
AGAGTGGCAAGCGCTC_1	SeuratProject	9134	1260	GSM3823939_control.s1.dgecounts.rds	0.766367	control1	control	7	0	0	Distal tubular cells_1
AGAGTGGCATAGGATA_1	SeuratProject	15337	2022	GSM3823939_control.s1.dgecounts.rds	2.01474	control1	control	7	0	0	Distal tubular cells_1
AGAGTGGCATCGTCGG_1	SeuratProject	16550	2038	GSM3823939_control.s1.dgecounts.rds	1.45619	control1	control	5	5	5	Epithelial cells
AGAGTGGGTAGAAAGG_1	SeuratProject	14242	1744	GSM3823939_control.s1.dgecounts.rds	2.38731	control1	control	7	0	0	Distal tubular cells_1
AGAGTGGGTGCGATAG_1	SeuratProject	12719	1675	GSM3823939_control.s1.dgecounts.rds	1.76901	control1	control	7	0	0	Distal tubular cells_1
AGAGTGGGTTGTGGCC_1	SeuratProject	15624	1724	GSM3823939_control.s1.dgecounts.rds	3.36662	control1	control	5	5	5	Epithelial cells
AGAGTGGTCTCCAACC_1	SeuratProject	10185	1491	GSM3823939_control.s1.dgecounts.rds	2.43495	control1	control	3	1	1	Proximal tubular cells
AGATCTGCAGTGAGTG_1	SeuratProject	19965	2328	GSM3823939_control.s1.dgecounts.rds	0.601052	control1	control	3	1	1	Proximal tubular cells
AGATCTGCATCACCCT_1	SeuratProject	11537	1536	GSM3823939_control.s1.dgecounts.rds	0.615411	control1	control	11	7	7	Fibroblasts_1
AGATCTGCATCCAACA_1	SeuratProject	10940	1488	GSM3823939_control.s1.dgecounts.rds	1.59049	control1	control	5	5	5	Epithelial cells
AGATCTGGTGAGCGAT_1	SeuratProject	63156	4931	GSM3823939_control.s1.dgecounts.rds	9.24378	control1	control	5	5	5	Epithelial cells
AGATCTGTCCAAAGTC_1	SeuratProject	16074	1775	GSM3823939_control.s1.dgecounts.rds	0.653229	control1	control	5	5	5	Epithelial cells
AGATCTGTCGGCGCAT_1	SeuratProject	23546	2806	GSM3823939_control.s1.dgecounts.rds	1.15094	control1	control	8	6	6	neutrophil
AGATTGCCACCGTTGG_1	SeuratProject	15343	1865	GSM3823939_control.s1.dgecounts.rds	6.51763	control1	control	3	1	1	Proximal tubular cells
AGATTGCCAGGTCCAC_1	SeuratProject	16847	1992	GSM3823939_control.s1.dgecounts.rds	0.866623	control1	control	0	3	3	Intercalated cells
AGATTGCGTTACGACT_1	SeuratProject	15388	1968	GSM3823939_control.s1.dgecounts.rds	0.890304	control1	control	7	0	0	Distal tubular cells_1
AGCAGCCAGATGTGTA_1	SeuratProject	10826	1394	GSM3823939_control.s1.dgecounts.rds	1.12692	control1	control	13	11	11	Fibroblasts_2
AGCAGCCAGGAATTAC_1	SeuratProject	23625	2645	GSM3823939_control.s1.dgecounts.rds	1.12169	control1	control	8	6	6	neutrophil
AGCAGCCCAAGTTGTC_1	SeuratProject	9070	1253	GSM3823939_control.s1.dgecounts.rds	1.27894	control1	control	11	7	7	Fibroblasts_1
AGCAGCCCAATAACGA_1	SeuratProject	11888	1338	GSM3823939_control.s1.dgecounts.rds	2.5572	control1	control	4	4	4	Distal tubular cells_2
AGCAGCCCACCACGTG_1	SeuratProject	8875	1144	GSM3823939_control.s1.dgecounts.rds	1.11549	control1	control	0	3	3	Intercalated cells
AGCAGCCCAGTAGAGC_1	SeuratProject	8179	1004	GSM3823939_control.s1.dgecounts.rds	3.79019	control1	control	10	9	9	podocytes
AGCAGCCGTATGCTTG_1	SeuratProject	16360	2125	GSM3823939_control.s1.dgecounts.rds	0.44621	control1	control	7	0	0	Distal tubular cells_1
AGCAGCCGTCGCGGTT_1	SeuratProject	18117	2121	GSM3823939_control.s1.dgecounts.rds	0.910747	control1	control	0	3	3	Intercalated cells
AGCAGCCGTTAGGGTG_1	SeuratProject	9545	1248	GSM3823939_control.s1.dgecounts.rds	2.2001	control1	control	8	6	6	neutrophil
AGCATACAGACTGGGT_1	SeuratProject	20098	2544	GSM3823939_control.s1.dgecounts.rds	2.12459	control1	control	8	6	6	neutrophil
AGCATACAGAGTACAT_1	SeuratProject	16438	1893	GSM3823939_control.s1.dgecounts.rds	1.24103	control1	control	7	0	0	Distal tubular cells_1
AGCATACAGGTGGGTT_1	SeuratProject	12443	1661	GSM3823939_control.s1.dgecounts.rds	0.972434	control1	control	7	0	0	Distal tubular cells_1
AGCATACCACAACTGT_1	SeuratProject	13963	1648	GSM3823939_control.s1.dgecounts.rds	1.14589	control1	control	0	3	3	Intercalated cells
AGCATACCACGGTGTC_1	SeuratProject	21710	2370	GSM3823939_control.s1.dgecounts.rds	0.907416	control1	control	7	0	0	Distal tubular cells_1
AGCATACCAGCCTATA_1	SeuratProject	17002	2087	GSM3823939_control.s1.dgecounts.rds	1.541	control1	control	7	0	0	Distal tubular cells_1
AGCATACGTATAAACG_1	SeuratProject	10037	1227	GSM3823939_control.s1.dgecounts.rds	10.6705	control1	control	13	11	11	Fibroblasts_2
AGCATACGTCCGAGTC_1	SeuratProject	8963	1232	GSM3823939_control.s1.dgecounts.rds	14.8388	control1	control	0	3	3	Intercalated cells
AGCATACGTGGCGAAT_1	SeuratProject	13437	1582	GSM3823939_control.s1.dgecounts.rds	1.67448	control1	control	12	10	10	B cell
AGCATACGTTCAGCGC_1	SeuratProject	6478	956	GSM3823939_control.s1.dgecounts.rds	2.02223	control1	control	4	4	4	Distal tubular cells_2
AGCATACTCACCAGGC_1	SeuratProject	15931	1836	GSM3823939_control.s1.dgecounts.rds	1.43117	control1	control	5	5	5	Epithelial cells
AGCATACTCCCTTGCA_1	SeuratProject	17003	2081	GSM3823939_control.s1.dgecounts.rds	0.98218	control1	control	7	0	0	Distal tubular cells_1
AGCATACTCGATGAGG_1	SeuratProject	11164	1612	GSM3823939_control.s1.dgecounts.rds	2.92906	control1	control	0	3	3	Intercalated cells
AGCCTAAAGATCTGCT_1	SeuratProject	10494	1394	GSM3823939_control.s1.dgecounts.rds	1.04822	control1	control	0	3	3	Intercalated cells
AGCCTAACATCGGACC_1	SeuratProject	11920	1438	GSM3823939_control.s1.dgecounts.rds	0.922819	control1	control	12	10	10	B cell
AGCCTAAGTAAGCACG_1	SeuratProject	24758	2932	GSM3823939_control.s1.dgecounts.rds	3.18281	control1	control	7	0	0	Distal tubular cells_1
AGCCTAAGTGTGAATA_1	SeuratProject	13818	1632	GSM3823939_control.s1.dgecounts.rds	1.38226	control1	control	0	3	3	Intercalated cells
AGCGGTCCAAACTGTC_1	SeuratProject	22072	2889	GSM3823939_control.s1.dgecounts.rds	0.738492	control1	control	11	7	7	Fibroblasts_1
AGCGGTCCAAGGGTCA_1	SeuratProject	13946	1540	GSM3823939_control.s1.dgecounts.rds	2.66743	control1	control	5	5	5	Epithelial cells
AGCGGTCCATACTCTT_1	SeuratProject	23207	2764	GSM3823939_control.s1.dgecounts.rds	3.61098	control1	control	8	6	6	neutrophil
AGCGGTCGTCTCTCGT_1	SeuratProject	42998	3786	GSM3823939_control.s1.dgecounts.rds	4.92581	control1	control	4	4	4	Distal tubular cells_2
AGCGGTCGTTGATTGC_1	SeuratProject	7924	1296	GSM3823939_control.s1.dgecounts.rds	0.959112	control1	control	0	3	3	Intercalated cells
AGCGGTCTCAGTGCAT_1	SeuratProject	8371	1242	GSM3823939_control.s1.dgecounts.rds	1.44547	control1	control	3	1	1	Proximal tubular cells
AGCGTATAGAGCCTAG_1	SeuratProject	10026	1176	GSM3823939_control.s1.dgecounts.rds	32.5155	control1	control	11	7	7	Fibroblasts_1
AGCGTATCACGCCAGT_1	SeuratProject	17267	1802	GSM3823939_control.s1.dgecounts.rds	1.12932	control1	control	0	3	3	Intercalated cells
AGCGTATGTACAAGTA_1	SeuratProject	29515	3181	GSM3823939_control.s1.dgecounts.rds	0.728443	control1	control	7	0	0	Distal tubular cells_1
AGCGTATGTACTCAAC_1	SeuratProject	15411	2037	GSM3823939_control.s1.dgecounts.rds	1.02524	control1	control	11	7	7	Fibroblasts_1
AGCGTATGTCCATCCT_1	SeuratProject	8514	1254	GSM3823939_control.s1.dgecounts.rds	1.15105	control1	control	0	3	3	Intercalated cells
AGCGTATGTTCTCATT_1	SeuratProject	11611	1622	GSM3823939_control.s1.dgecounts.rds	3.22108	control1	control	7	0	0	Distal tubular cells_1
AGCGTATTCAACGCTA_1	SeuratProject	17317	2110	GSM3823939_control.s1.dgecounts.rds	1.32817	control1	control	0	3	3	Intercalated cells
AGCGTATTCATAACCG_1	SeuratProject	19291	1783	GSM3823939_control.s1.dgecounts.rds	31.989	control1	control	7	0	0	Distal tubular cells_1
AGCGTATTCCAACCAA_1	SeuratProject	39151	4084	GSM3823939_control.s1.dgecounts.rds	0.263084	control1	control	3	1	1	Proximal tubular cells
AGCGTATTCTCGTTTA_1	SeuratProject	15832	1780	GSM3823939_control.s1.dgecounts.rds	6.66372	control1	control	4	4	4	Distal tubular cells_2
AGCGTCGCATTTCACT_1	SeuratProject	9923	1508	GSM3823939_control.s1.dgecounts.rds	0.282173	control1	control	3	1	1	Proximal tubular cells
AGCTCCTAGCAATCTC_1	SeuratProject	17793	2041	GSM3823939_control.s1.dgecounts.rds	1.91648	control1	control	0	3	3	Intercalated cells
AGCTCCTAGCCACGCT_1	SeuratProject	14195	1751	GSM3823939_control.s1.dgecounts.rds	5.0229	control1	control	7	0	0	Distal tubular cells_1
AGCTCCTAGTGGCACA_1	SeuratProject	20053	2134	GSM3823939_control.s1.dgecounts.rds	1.66559	control1	control	10	9	9	podocytes
AGCTCCTAGTGTACGG_1	SeuratProject	35670	3295	GSM3823939_control.s1.dgecounts.rds	12.0045	control1	control	4	4	4	Distal tubular cells_2
AGCTCCTCAGTTCATG_1	SeuratProject	17455	1945	GSM3823939_control.s1.dgecounts.rds	1.54111	control1	control	5	5	5	Epithelial cells
AGCTCTCAGCCCAATT_1	SeuratProject	8978	1327	GSM3823939_control.s1.dgecounts.rds	1.78213	control1	control	7	0	0	Distal tubular cells_1
AGCTCTCAGCGACGTA_1	SeuratProject	14545	1743	GSM3823939_control.s1.dgecounts.rds	0.907528	control1	control	5	5	5	Epithelial cells
AGCTCTCCACATCCGG_1	SeuratProject	11366	1441	GSM3823939_control.s1.dgecounts.rds	1.23174	control1	control	5	5	5	Epithelial cells
AGCTCTCCACGTCAGC_1	SeuratProject	6377	1030	GSM3823939_control.s1.dgecounts.rds	3.55967	control1	control	7	0	0	Distal tubular cells_1
AGCTCTCCATTTCAGG_1	SeuratProject	11395	1386	GSM3823939_control.s1.dgecounts.rds	0.745941	control1	control	5	5	5	Epithelial cells
AGCTCTCGTCGGATCC_1	SeuratProject	8690	1001	GSM3823939_control.s1.dgecounts.rds	28.1243	control1	control	0	3	3	Intercalated cells
AGCTCTCGTTCGTCTC_1	SeuratProject	25992	2901	GSM3823939_control.s1.dgecounts.rds	0.777162	control1	control	7	0	0	Distal tubular cells_1
AGCTCTCTCACGCATA_1	SeuratProject	21685	2438	GSM3823939_control.s1.dgecounts.rds	2.2089	control1	control	11	7	7	Fibroblasts_1
AGCTTGAAGTATGACA_1	SeuratProject	12674	897	GSM3823939_control.s1.dgecounts.rds	53.7557	control1	control	7	0	0	Distal tubular cells_1
AGCTTGACACGAAACG_1	SeuratProject	21982	2341	GSM3823939_control.s1.dgecounts.rds	0.668729	control1	control	0	3	3	Intercalated cells
AGCTTGAGTCTGCCAG_1	SeuratProject	7564	1185	GSM3823939_control.s1.dgecounts.rds	2.19461	control1	control	7	0	0	Distal tubular cells_1
AGCTTGAGTGTAAGTA_1	SeuratProject	10451	1243	GSM3823939_control.s1.dgecounts.rds	2.00938	control1	control	5	5	5	Epithelial cells
AGCTTGATCAGTGCAT_1	SeuratProject	7335	1111	GSM3823939_control.s1.dgecounts.rds	1.58146	control1	control	0	3	3	Intercalated cells
AGCTTGATCGGCCGAT_1	SeuratProject	9530	1408	GSM3823939_control.s1.dgecounts.rds	0.954879	control1	control	7	0	0	Distal tubular cells_1
AGGCCACAGTTGAGAT_1	SeuratProject	17719	1903	GSM3823939_control.s1.dgecounts.rds	0.8014	control1	control	12	10	10	B cell
AGGCCACCATCGGGTC_1	SeuratProject	20576	2364	GSM3823939_control.s1.dgecounts.rds	0.685264	control1	control	7	0	0	Distal tubular cells_1
AGGCCACGTACACCGC_1	SeuratProject	18502	2055	GSM3823939_control.s1.dgecounts.rds	1.21068	control1	control	7	0	0	Distal tubular cells_1
AGGCCACGTACCATCA_1	SeuratProject	9857	1519	GSM3823939_control.s1.dgecounts.rds	1.69423	control1	control	3	1	1	Proximal tubular cells
AGGCCACGTCGCATAT_1	SeuratProject	11067	1350	GSM3823939_control.s1.dgecounts.rds	14.2676	control1	control	4	4	4	Distal tubular cells_2
AGGCCACGTTGTCGCG_1	SeuratProject	7673	1118	GSM3823939_control.s1.dgecounts.rds	0.638603	control1	control	0	3	3	Intercalated cells
AGGCCGTCAAGTAGTA_1	SeuratProject	15143	1935	GSM3823939_control.s1.dgecounts.rds	0.917916	control1	control	7	0	0	Distal tubular cells_1
AGGCCGTCACCTATCC_1	SeuratProject	24476	2629	GSM3823939_control.s1.dgecounts.rds	16.506	control1	control	3	1	1	Proximal tubular cells
AGGCCGTCAGCAGTTT_1	SeuratProject	13959	2065	GSM3823939_control.s1.dgecounts.rds	2.28526	control1	control	3	1	1	Proximal tubular cells
AGGCCGTCAGGGCATA_1	SeuratProject	34816	3327	GSM3823939_control.s1.dgecounts.rds	3.65636	control1	control	4	4	4	Distal tubular cells_2
AGGCCGTCATGTCTCC_1	SeuratProject	27618	2848	GSM3823939_control.s1.dgecounts.rds	5.46745	control1	control	4	4	4	Distal tubular cells_2
AGGCCGTGTAAGAGGA_1	SeuratProject	15909	1842	GSM3823939_control.s1.dgecounts.rds	3.87202	control1	control	5	5	5	Epithelial cells
AGGCCGTGTGACGCCT_1	SeuratProject	10000	1180	GSM3823939_control.s1.dgecounts.rds	5.82	control1	control	4	4	4	Distal tubular cells_2
AGGCCGTTCAGCTGGC_1	SeuratProject	10186	1382	GSM3823939_control.s1.dgecounts.rds	1.92421	control1	control	7	0	0	Distal tubular cells_1
AGGCCGTTCGAATGGG_1	SeuratProject	10711	1516	GSM3823939_control.s1.dgecounts.rds	1.58715	control1	control	7	0	0	Distal tubular cells_1
AGGCCGTTCGGAGCAA_1	SeuratProject	19828	2456	GSM3823939_control.s1.dgecounts.rds	3.66149	control1	control	3	1	1	Proximal tubular cells
AGGCCGTTCTATCCTA_1	SeuratProject	12171	1628	GSM3823939_control.s1.dgecounts.rds	2.14444	control1	control	7	0	0	Distal tubular cells_1
AGGGAGTAGACCTAGG_1	SeuratProject	19534	2242	GSM3823939_control.s1.dgecounts.rds	1.52555	control1	control	7	0	0	Distal tubular cells_1
AGGGAGTCACCAGATT_1	SeuratProject	16400	1895	GSM3823939_control.s1.dgecounts.rds	1.59756	control1	control	7	0	0	Distal tubular cells_1
AGGGAGTGTAAATGTG_1	SeuratProject	10904	1459	GSM3823939_control.s1.dgecounts.rds	1.65077	control1	control	7	0	0	Distal tubular cells_1
AGGGAGTGTACTTAGC_1	SeuratProject	15335	1667	GSM3823939_control.s1.dgecounts.rds	2.64754	control1	control	5	5	5	Epithelial cells
AGGGAGTGTGAGGCTA_1	SeuratProject	15245	2122	GSM3823939_control.s1.dgecounts.rds	1.36438	control1	control	7	0	0	Distal tubular cells_1
AGGGAGTTCAAGCCTA_1	SeuratProject	13747	1480	GSM3823939_control.s1.dgecounts.rds	1.53488	control1	control	0	3	3	Intercalated cells
AGGGAGTTCGTCGTTC_1	SeuratProject	7199	1064	GSM3823939_control.s1.dgecounts.rds	1.65301	control1	control	11	7	7	Fibroblasts_1
AGGGATGAGTGAAGAG_1	SeuratProject	9107	1135	GSM3823939_control.s1.dgecounts.rds	2.18513	control1	control	7	0	0	Distal tubular cells_1
AGGGATGAGTGGGCTA_1	SeuratProject	10121	1448	GSM3823939_control.s1.dgecounts.rds	2.14406	control1	control	7	0	0	Distal tubular cells_1
AGGGATGAGTGTGGCA_1	SeuratProject	12321	1413	GSM3823939_control.s1.dgecounts.rds	1.39599	control1	control	5	5	5	Epithelial cells
AGGGATGCACGGCTAC_1	SeuratProject	6382	1050	GSM3823939_control.s1.dgecounts.rds	1.94296	control1	control	7	0	0	Distal tubular cells_1
AGGGATGCACTAGTAC_1	SeuratProject	11066	1458	GSM3823939_control.s1.dgecounts.rds	1.66275	control1	control	7	0	0	Distal tubular cells_1
AGGGATGCAGCTATTG_1	SeuratProject	21970	2485	GSM3823939_control.s1.dgecounts.rds	0.728266	control1	control	3	1	1	Proximal tubular cells
AGGGATGCATCGGGTC_1	SeuratProject	19017	2107	GSM3823939_control.s1.dgecounts.rds	0.978072	control1	control	12	10	10	B cell
AGGGATGCATGGATGG_1	SeuratProject	23122	2598	GSM3823939_control.s1.dgecounts.rds	1.44019	control1	control	7	0	0	Distal tubular cells_1
AGGGATGGTAAGGGAA_1	SeuratProject	34690	3260	GSM3823939_control.s1.dgecounts.rds	1.19054	control1	control	10	9	9	podocytes
AGGGATGGTAAGTAGT_1	SeuratProject	32249	3225	GSM3823939_control.s1.dgecounts.rds	0.806227	control1	control	7	0	0	Distal tubular cells_1
AGGGATGTCATGTGGT_1	SeuratProject	14035	1782	GSM3823939_control.s1.dgecounts.rds	1.51051	control1	control	7	0	0	Distal tubular cells_1
AGGGATGTCCTTCAAT_1	SeuratProject	12770	1689	GSM3823939_control.s1.dgecounts.rds	1.35474	control1	control	7	0	0	Distal tubular cells_1
AGGGTGACAACAACCT_1	SeuratProject	24997	2220	GSM3823939_control.s1.dgecounts.rds	22.9548	control1	control	4	4	4	Distal tubular cells_2
AGGGTGAGTCAGAATA_1	SeuratProject	6744	815	GSM3823939_control.s1.dgecounts.rds	7.88849	control1	control	13	11	11	Fibroblasts_2
AGGGTGAGTGTTCTTT_1	SeuratProject	11598	1709	GSM3823939_control.s1.dgecounts.rds	2.10381	control1	control	2	0	0	Distal tubular cells_1
AGGGTGATCACTCTTA_1	SeuratProject	16744	2019	GSM3823939_control.s1.dgecounts.rds	2.03655	control1	control	0	3	3	Intercalated cells
AGGTCATAGATATACG_1	SeuratProject	16318	1862	GSM3823939_control.s1.dgecounts.rds	1.3482	control1	control	12	10	10	B cell
AGGTCATAGCGCTTAT_1	SeuratProject	9514	1491	GSM3823939_control.s1.dgecounts.rds	0.620139	control1	control	3	1	1	Proximal tubular cells
AGGTCATAGTACGCCC_1	SeuratProject	15980	1783	GSM3823939_control.s1.dgecounts.rds	8.57947	control1	control	4	4	4	Distal tubular cells_2
AGGTCATCACACTGCG_1	SeuratProject	17863	1969	GSM3823939_control.s1.dgecounts.rds	9.36573	control1	control	4	4	4	Distal tubular cells_2
AGGTCATGTTAAGACA_1	SeuratProject	7767	1091	GSM3823939_control.s1.dgecounts.rds	10.5446	control1	control	3	1	1	Proximal tubular cells
AGGTCATGTTCCCGAG_1	SeuratProject	18132	2101	GSM3823939_control.s1.dgecounts.rds	0.639753	control1	control	0	3	3	Intercalated cells
AGGTCATTCCCAGGTG_1	SeuratProject	11609	1407	GSM3823939_control.s1.dgecounts.rds	1.73142	control1	control	5	5	5	Epithelial cells
AGGTCATTCCTGCTTG_1	SeuratProject	14382	1824	GSM3823939_control.s1.dgecounts.rds	0.841329	control1	control	3	1	1	Proximal tubular cells
AGGTCATTCGCGTTTC_1	SeuratProject	10629	1377	GSM3823939_control.s1.dgecounts.rds	1.0349	control1	control	13	11	11	Fibroblasts_2
AGGTCATTCTCTTGAT_1	SeuratProject	13670	1683	GSM3823939_control.s1.dgecounts.rds	0.892465	control1	control	0	3	3	Intercalated cells
AGGTCATTCTTTACAC_1	SeuratProject	14243	1778	GSM3823939_control.s1.dgecounts.rds	1.29888	control1	control	5	5	5	Epithelial cells
AGGTCCGAGAATTCCC_1	SeuratProject	8232	1147	GSM3823939_control.s1.dgecounts.rds	1.29981	control1	control	7	0	0	Distal tubular cells_1
AGGTCCGAGCGTGAGT_1	SeuratProject	14047	1713	GSM3823939_control.s1.dgecounts.rds	1.02513	control1	control	0	3	3	Intercalated cells
AGGTCCGAGGAGTCTG_1	SeuratProject	22005	2552	GSM3823939_control.s1.dgecounts.rds	3.26744	control1	control	3	1	1	Proximal tubular cells
AGGTCCGAGGCTAGAC_1	SeuratProject	19956	2324	GSM3823939_control.s1.dgecounts.rds	1.17258	control1	control	13	11	11	Fibroblasts_2
AGGTCCGAGTCGAGTG_1	SeuratProject	10566	1227	GSM3823939_control.s1.dgecounts.rds	1.38179	control1	control	12	10	10	B cell
AGGTCCGAGTGAACGC_1	SeuratProject	44757	3641	GSM3823939_control.s1.dgecounts.rds	11.3993	control1	control	0	3	3	Intercalated cells
AGGTCCGCAGGGAGAG_1	SeuratProject	11135	1488	GSM3823939_control.s1.dgecounts.rds	1.52672	control1	control	7	0	0	Distal tubular cells_1
AGGTCCGGTGTGCCTG_1	SeuratProject	13707	1732	GSM3823939_control.s1.dgecounts.rds	0.977603	control1	control	3	1	1	Proximal tubular cells
AGGTCCGGTTGCTCCT_1	SeuratProject	14352	1788	GSM3823939_control.s1.dgecounts.rds	1.23328	control1	control	7	0	0	Distal tubular cells_1
AGGTCCGTCGACCAGC_1	SeuratProject	12263	1681	GSM3823939_control.s1.dgecounts.rds	1.2395	control1	control	3	1	1	Proximal tubular cells
AGGTCCGTCTCCTATA_1	SeuratProject	9798	1386	GSM3823939_control.s1.dgecounts.rds	0.755256	control1	control	7	0	0	Distal tubular cells_1
AGTAGTCCAAGCTGTT_1	SeuratProject	36492	3790	GSM3823939_control.s1.dgecounts.rds	1.29891	control1	control	5	5	5	Epithelial cells
AGTAGTCCAGACTCGC_1	SeuratProject	14486	1622	GSM3823939_control.s1.dgecounts.rds	2.33329	control1	control	7	0	0	Distal tubular cells_1
AGTAGTCGTACCGTAT_1	SeuratProject	24498	2801	GSM3823939_control.s1.dgecounts.rds	0.873541	control1	control	7	0	0	Distal tubular cells_1
AGTAGTCGTGCCTGTG_1	SeuratProject	10660	1380	GSM3823939_control.s1.dgecounts.rds	0.87242	control1	control	0	3	3	Intercalated cells
AGTAGTCGTTACGCGC_1	SeuratProject	6722	1089	GSM3823939_control.s1.dgecounts.rds	1.23475	control1	control	7	0	0	Distal tubular cells_1
AGTAGTCTCACAGGCC_1	SeuratProject	10980	1354	GSM3823939_control.s1.dgecounts.rds	6.03825	control1	control	5	5	5	Epithelial cells
AGTAGTCTCCGGGTGT_1	SeuratProject	32350	3387	GSM3823939_control.s1.dgecounts.rds	0.506955	control1	control	8	6	6	neutrophil
AGTAGTCTCTTGCAAG_1	SeuratProject	15957	1875	GSM3823939_control.s1.dgecounts.rds	0.758288	control1	control	7	0	0	Distal tubular cells_1
AGTCTTTAGACATAAC_1	SeuratProject	9438	1179	GSM3823939_control.s1.dgecounts.rds	2.71244	control1	control	4	4	4	Distal tubular cells_2
AGTCTTTGTAGCTCCG_1	SeuratProject	15026	1597	GSM3823939_control.s1.dgecounts.rds	21.1567	control1	control	7	0	0	Distal tubular cells_1
AGTCTTTTCAACTCTT_1	SeuratProject	5342	865	GSM3823939_control.s1.dgecounts.rds	0.486709	control1	control	0	3	3	Intercalated cells
AGTGAGGAGGTGTTAA_1	SeuratProject	18172	2193	GSM3823939_control.s1.dgecounts.rds	5.60203	control1	control	7	0	0	Distal tubular cells_1
AGTGAGGCACGTCTCT_1	SeuratProject	13502	1729	GSM3823939_control.s1.dgecounts.rds	2.96993	control1	control	7	0	0	Distal tubular cells_1
AGTGAGGTCACCACCT_1	SeuratProject	31879	3343	GSM3823939_control.s1.dgecounts.rds	3.1149	control1	control	3	1	1	Proximal tubular cells
AGTGAGGTCACGGTTA_1	SeuratProject	13790	1583	GSM3823939_control.s1.dgecounts.rds	9.21682	control1	control	0	3	3	Intercalated cells
AGTGAGGTCAGCTCTC_1	SeuratProject	10900	1400	GSM3823939_control.s1.dgecounts.rds	5.97248	control1	control	5	5	5	Epithelial cells
AGTGAGGTCGCGGATC_1	SeuratProject	18538	1624	GSM3823939_control.s1.dgecounts.rds	25.4612	control1	control	4	4	4	Distal tubular cells_2
AGTGAGGTCGGATGTT_1	SeuratProject	19722	2172	GSM3823939_control.s1.dgecounts.rds	7.45868	control1	control	3	1	1	Proximal tubular cells
AGTGAGGTCGTTTGCC_1	SeuratProject	14595	1745	GSM3823939_control.s1.dgecounts.rds	2.69955	control1	control	11	7	7	Fibroblasts_1
AGTGGGAAGCAATCTC_1	SeuratProject	9966	1208	GSM3823939_control.s1.dgecounts.rds	2.92996	control1	control	0	3	3	Intercalated cells
AGTGGGAAGCTCCTCT_1	SeuratProject	13658	1705	GSM3823939_control.s1.dgecounts.rds	1.57417	control1	control	3	1	1	Proximal tubular cells
AGTGGGAAGGCAATTA_1	SeuratProject	10440	1427	GSM3823939_control.s1.dgecounts.rds	3.83142	control1	control	0	3	3	Intercalated cells
AGTGGGAAGGTAGCTG_1	SeuratProject	9845	1482	GSM3823939_control.s1.dgecounts.rds	2.67141	control1	control	3	1	1	Proximal tubular cells
AGTGGGAAGTTACCCA_1	SeuratProject	21204	2047	GSM3823939_control.s1.dgecounts.rds	19.5435	control1	control	7	0	0	Distal tubular cells_1
AGTGGGACAAACGCGA_1	SeuratProject	11638	1554	GSM3823939_control.s1.dgecounts.rds	1.56384	control1	control	0	3	3	Intercalated cells
AGTGGGACATTTCACT_1	SeuratProject	27161	2984	GSM3823939_control.s1.dgecounts.rds	1.08612	control1	control	7	0	0	Distal tubular cells_1
AGTGGGAGTAGCACGA_1	SeuratProject	19471	2123	GSM3823939_control.s1.dgecounts.rds	1.13502	control1	control	5	5	5	Epithelial cells
AGTGGGAGTCAAAGCG_1	SeuratProject	11216	1506	GSM3823939_control.s1.dgecounts.rds	1.5781	control1	control	0	3	3	Intercalated cells
AGTGGGAGTCTCCATC_1	SeuratProject	16934	1974	GSM3823939_control.s1.dgecounts.rds	1.63576	control1	control	10	9	9	podocytes
AGTGGGAGTTCCCGAG_1	SeuratProject	19014	1919	GSM3823939_control.s1.dgecounts.rds	1.20964	control1	control	7	0	0	Distal tubular cells_1
AGTGGGATCTCTGCTG_1	SeuratProject	19362	2419	GSM3823939_control.s1.dgecounts.rds	1.16207	control1	control	8	6	6	neutrophil
AGTGTCAGTCCAGTGC_1	SeuratProject	12123	1479	GSM3823939_control.s1.dgecounts.rds	1.05584	control1	control	0	3	3	Intercalated cells
AGTGTCAGTGACGGTA_1	SeuratProject	17850	1974	GSM3823939_control.s1.dgecounts.rds	1.12045	control1	control	10	9	9	podocytes
AGTGTCAGTGGTAACG_1	SeuratProject	27720	2578	GSM3823939_control.s1.dgecounts.rds	0.847763	control1	control	5	5	5	Epithelial cells
AGTGTCAGTTGAGGTG_1	SeuratProject	14642	1780	GSM3823939_control.s1.dgecounts.rds	0.730774	control1	control	5	5	5	Epithelial cells
AGTGTCATCCATTCTA_1	SeuratProject	14938	1943	GSM3823939_control.s1.dgecounts.rds	1.66689	control1	control	7	0	0	Distal tubular cells_1
AGTGTCATCCGGCACA_1	SeuratProject	6382	1041	GSM3823939_control.s1.dgecounts.rds	4.32466	control1	control	11	7	7	Fibroblasts_1
AGTGTCATCGCACTCT_1	SeuratProject	6542	1003	GSM3823939_control.s1.dgecounts.rds	3.3476	control1	control	9	8	8	kidney endothelial cells
AGTGTCATCGTACCGG_1	SeuratProject	17207	2059	GSM3823939_control.s1.dgecounts.rds	3.62062	control1	control	7	0	0	Distal tubular cells_1
AGTGTCATCTCCAACC_1	SeuratProject	18048	2101	GSM3823939_control.s1.dgecounts.rds	0.864362	control1	control	0	3	3	Intercalated cells
AGTTGGTAGGTAAACT_1	SeuratProject	8533	1019	GSM3823939_control.s1.dgecounts.rds	23.415	control1	control	13	11	11	Fibroblasts_2
AGTTGGTCATCCGGGT_1	SeuratProject	21480	2602	GSM3823939_control.s1.dgecounts.rds	1.06611	control1	control	3	1	1	Proximal tubular cells
AGTTGGTCATGTTCCC_1	SeuratProject	11056	1453	GSM3823939_control.s1.dgecounts.rds	1.70043	control1	control	8	6	6	neutrophil
AGTTGGTTCCAAGTAC_1	SeuratProject	35568	2989	GSM3823939_control.s1.dgecounts.rds	13.7933	control1	control	12	10	10	B cell
ATAACGCAGCGTTCCG_1	SeuratProject	26366	2501	GSM3823939_control.s1.dgecounts.rds	0.530987	control1	control	4	4	4	Distal tubular cells_2
ATAACGCCACGTGAGA_1	SeuratProject	13832	1646	GSM3823939_control.s1.dgecounts.rds	0.918161	control1	control	7	0	0	Distal tubular cells_1
ATAACGCCATGTAGTC_1	SeuratProject	33647	4040	GSM3823939_control.s1.dgecounts.rds	0.573602	control1	control	7	0	0	Distal tubular cells_1
ATAACGCGTCTGATTG_1	SeuratProject	14318	1632	GSM3823939_control.s1.dgecounts.rds	6.94231	control1	control	4	4	4	Distal tubular cells_2
ATAACGCGTGCATCTA_1	SeuratProject	20246	2285	GSM3823939_control.s1.dgecounts.rds	7.67065	control1	control	7	0	0	Distal tubular cells_1
ATAACGCTCAACTCTT_1	SeuratProject	6532	931	GSM3823939_control.s1.dgecounts.rds	1.46969	control1	control	11	7	7	Fibroblasts_1
ATAACGCTCACAATGC_1	SeuratProject	14114	1486	GSM3823939_control.s1.dgecounts.rds	2.22474	control1	control	5	5	5	Epithelial cells
ATAACGCTCTCAAACG_1	SeuratProject	15279	1852	GSM3823939_control.s1.dgecounts.rds	0.536684	control1	control	3	1	1	Proximal tubular cells
ATAAGAGAGATATGCA_1	SeuratProject	14481	1686	GSM3823939_control.s1.dgecounts.rds	0.794144	control1	control	3	1	1	Proximal tubular cells
ATAAGAGCAGCGTAAG_1	SeuratProject	25050	2860	GSM3823939_control.s1.dgecounts.rds	0.57485	control1	control	3	1	1	Proximal tubular cells
ATAAGAGGTAGCACGA_1	SeuratProject	10345	1483	GSM3823939_control.s1.dgecounts.rds	0.908652	control1	control	11	7	7	Fibroblasts_1
ATAAGAGGTGACTCAT_1	SeuratProject	10535	1348	GSM3823939_control.s1.dgecounts.rds	1.19601	control1	control	0	3	3	Intercalated cells
ATAAGAGGTGTTCTTT_1	SeuratProject	8022	1257	GSM3823939_control.s1.dgecounts.rds	2.68013	control1	control	3	1	1	Proximal tubular cells
ATAAGAGGTTAGGGTG_1	SeuratProject	12282	1495	GSM3823939_control.s1.dgecounts.rds	1.21316	control1	control	0	3	3	Intercalated cells
ATAAGAGTCACGGTTA_1	SeuratProject	15605	1969	GSM3823939_control.s1.dgecounts.rds	0.884332	control1	control	7	0	0	Distal tubular cells_1
ATAAGAGTCCTGTAGA_1	SeuratProject	12644	1809	GSM3823939_control.s1.dgecounts.rds	1.62132	control1	control	7	0	0	Distal tubular cells_1
ATAAGAGTCTGCAGTA_1	SeuratProject	27477	3230	GSM3823939_control.s1.dgecounts.rds	0.61506	control1	control	3	1	1	Proximal tubular cells
ATAGACCAGCAAATCA_1	SeuratProject	8153	1025	GSM3823939_control.s1.dgecounts.rds	3.21354	control1	control	0	3	3	Intercalated cells
ATAGACCCAAGGACTG_1	SeuratProject	32724	3329	GSM3823939_control.s1.dgecounts.rds	2.55164	control1	control	3	1	1	Proximal tubular cells
ATAGACCGTGCGCTTG_1	SeuratProject	25475	2515	GSM3823939_control.s1.dgecounts.rds	11.8626	control1	control	4	4	4	Distal tubular cells_2
ATAGACCTCAGAGGTG_1	SeuratProject	6985	1095	GSM3823939_control.s1.dgecounts.rds	1.60344	control1	control	5	5	5	Epithelial cells
ATCACGAAGAATTCCC_1	SeuratProject	19846	2377	GSM3823939_control.s1.dgecounts.rds	0.609695	control1	control	3	1	1	Proximal tubular cells
ATCACGAGTAAGGATT_1	SeuratProject	17570	2058	GSM3823939_control.s1.dgecounts.rds	1.8099	control1	control	7	0	0	Distal tubular cells_1
ATCACGAGTCTTCTCG_1	SeuratProject	7941	1159	GSM3823939_control.s1.dgecounts.rds	5.57864	control1	control	3	1	1	Proximal tubular cells
ATCACGAGTTGAACTC_1	SeuratProject	10889	1234	GSM3823939_control.s1.dgecounts.rds	5.07852	control1	control	5	5	5	Epithelial cells
ATCACGATCAAACCGT_1	SeuratProject	19756	2266	GSM3823939_control.s1.dgecounts.rds	0.622596	control1	control	8	6	6	neutrophil
ATCACGATCAACGCTA_1	SeuratProject	41767	3692	GSM3823939_control.s1.dgecounts.rds	4.47961	control1	control	4	4	4	Distal tubular cells_2
ATCATCTAGTGGAGAA_1	SeuratProject	11143	1346	GSM3823939_control.s1.dgecounts.rds	2.03715	control1	control	5	5	5	Epithelial cells
ATCATCTTCGCGTTTC_1	SeuratProject	18051	2174	GSM3823939_control.s1.dgecounts.rds	3.2519	control1	control	7	0	0	Distal tubular cells_1
ATCATCTTCTCTGAGA_1	SeuratProject	8758	1113	GSM3823939_control.s1.dgecounts.rds	2.12377	control1	control	11	7	7	Fibroblasts_1
ATCATGGAGAAGATTC_1	SeuratProject	14902	1564	GSM3823939_control.s1.dgecounts.rds	1.23473	control1	control	5	5	5	Epithelial cells
ATCATGGAGAAGGCCT_1	SeuratProject	11014	1467	GSM3823939_control.s1.dgecounts.rds	1.26203	control1	control	7	0	0	Distal tubular cells_1
ATCATGGAGACACGAC_1	SeuratProject	16943	2127	GSM3823939_control.s1.dgecounts.rds	0.867615	control1	control	0	3	3	Intercalated cells
ATCATGGAGGTGCACA_1	SeuratProject	15931	2092	GSM3823939_control.s1.dgecounts.rds	1.95217	control1	control	8	6	6	neutrophil
ATCATGGCAAGAAGAG_1	SeuratProject	21764	2477	GSM3823939_control.s1.dgecounts.rds	1.03841	control1	control	0	3	3	Intercalated cells
ATCATGGCACTTAACG_1	SeuratProject	21235	2235	GSM3823939_control.s1.dgecounts.rds	8.34942	control1	control	0	3	3	Intercalated cells
ATCATGGCAGGGCATA_1	SeuratProject	22058	2149	GSM3823939_control.s1.dgecounts.rds	0.716293	control1	control	5	5	5	Epithelial cells
ATCATGGTCTCCGGTT_1	SeuratProject	18044	2285	GSM3823939_control.s1.dgecounts.rds	0.820217	control1	control	3	1	1	Proximal tubular cells
ATCCACCAGAAGGTTT_1	SeuratProject	13189	1531	GSM3823939_control.s1.dgecounts.rds	3.54841	control1	control	5	5	5	Epithelial cells
ATCCACCAGCAACGGT_1	SeuratProject	8344	1061	GSM3823939_control.s1.dgecounts.rds	3.72723	control1	control	7	0	0	Distal tubular cells_1
ATCCACCAGCTGCGAA_1	SeuratProject	16716	1979	GSM3823939_control.s1.dgecounts.rds	0.795645	control1	control	3	1	1	Proximal tubular cells
ATCCACCAGCTGTTCA_1	SeuratProject	17659	1811	GSM3823939_control.s1.dgecounts.rds	0.928705	control1	control	5	5	5	Epithelial cells
ATCCACCCACCAGCAC_1	SeuratProject	14235	1766	GSM3823939_control.s1.dgecounts.rds	7.26379	control1	control	4	4	4	Distal tubular cells_2
ATCCACCCAGTGAGTG_1	SeuratProject	21812	2056	GSM3823939_control.s1.dgecounts.rds	1.47625	control1	control	12	10	10	B cell
ATCCACCGTACATGTC_1	SeuratProject	21277	2228	GSM3823939_control.s1.dgecounts.rds	1.35827	control1	control	5	5	5	Epithelial cells
ATCCACCGTCATGCCG_1	SeuratProject	21764	2289	GSM3823939_control.s1.dgecounts.rds	1.44275	control1	control	5	5	5	Epithelial cells
ATCCACCGTGAAAGAG_1	SeuratProject	10290	1492	GSM3823939_control.s1.dgecounts.rds	2.40039	control1	control	7	0	0	Distal tubular cells_1
ATCCACCGTTAGTGGG_1	SeuratProject	14210	1796	GSM3823939_control.s1.dgecounts.rds	1.57635	control1	control	7	0	0	Distal tubular cells_1
ATCCACCGTTCCTCCA_1	SeuratProject	8987	1124	GSM3823939_control.s1.dgecounts.rds	2.05853	control1	control	7	0	0	Distal tubular cells_1
ATCCACCTCATCGCTC_1	SeuratProject	24446	2375	GSM3823939_control.s1.dgecounts.rds	14.4891	control1	control	5	5	5	Epithelial cells
ATCCACCTCCATGCTC_1	SeuratProject	10823	1296	GSM3823939_control.s1.dgecounts.rds	1.60769	control1	control	5	5	5	Epithelial cells
ATCCACCTCGTGGTCG_1	SeuratProject	16064	2000	GSM3823939_control.s1.dgecounts.rds	0.902639	control1	control	2	0	0	Distal tubular cells_1
ATCCACCTCTTGAGGT_1	SeuratProject	16927	1874	GSM3823939_control.s1.dgecounts.rds	2.12678	control1	control	5	5	5	Epithelial cells
ATCCGAAAGACTAGGC_1	SeuratProject	13180	1717	GSM3823939_control.s1.dgecounts.rds	7.76176	control1	control	3	1	1	Proximal tubular cells
ATCCGAAAGATCGATA_1	SeuratProject	31138	3052	GSM3823939_control.s1.dgecounts.rds	0.635879	control1	control	4	4	4	Distal tubular cells_2
ATCCGAAAGTCCGGTC_1	SeuratProject	7481	1148	GSM3823939_control.s1.dgecounts.rds	0.788665	control1	control	7	0	0	Distal tubular cells_1
ATCCGAAAGTCGTTTG_1	SeuratProject	6285	1076	GSM3823939_control.s1.dgecounts.rds	1.86158	control1	control	7	0	0	Distal tubular cells_1
ATCCGAAAGTTAACGA_1	SeuratProject	7118	1023	GSM3823939_control.s1.dgecounts.rds	5.25428	control1	control	0	3	3	Intercalated cells
ATCCGAAAGTTTAGGA_1	SeuratProject	9779	1376	GSM3823939_control.s1.dgecounts.rds	2.37243	control1	control	6	1	1	Proximal tubular cells
ATCCGAACACCTCGTT_1	SeuratProject	16626	2095	GSM3823939_control.s1.dgecounts.rds	1.07663	control1	control	7	0	0	Distal tubular cells_1
ATCCGAACATACTACG_1	SeuratProject	16127	1994	GSM3823939_control.s1.dgecounts.rds	1.02313	control1	control	7	0	0	Distal tubular cells_1
ATCCGAACATCAGTAC_1	SeuratProject	11369	1533	GSM3823939_control.s1.dgecounts.rds	2.19896	control1	control	7	0	0	Distal tubular cells_1
ATCCGAAGTTTCGCTC_1	SeuratProject	26391	2465	GSM3823939_control.s1.dgecounts.rds	0.723732	control1	control	4	4	4	Distal tubular cells_2
ATCCGAATCTATCGCC_1	SeuratProject	7571	1204	GSM3823939_control.s1.dgecounts.rds	1.69066	control1	control	9	8	8	kidney endothelial cells
ATCGAGTCACAGGAGT_1	SeuratProject	15216	2135	GSM3823939_control.s1.dgecounts.rds	0.97266	control1	control	8	6	6	neutrophil
ATCGAGTCACCACGTG_1	SeuratProject	13491	1735	GSM3823939_control.s1.dgecounts.rds	2.37936	control1	control	0	3	3	Intercalated cells
ATCGAGTTCACAACGT_1	SeuratProject	43039	4036	GSM3823939_control.s1.dgecounts.rds	5.25337	control1	control	4	4	4	Distal tubular cells_2
ATCGAGTTCGCAAACT_1	SeuratProject	14509	1757	GSM3823939_control.s1.dgecounts.rds	0.99938	control1	control	7	0	0	Distal tubular cells_1
ATCGAGTTCTGGTTCC_1	SeuratProject	12033	1666	GSM3823939_control.s1.dgecounts.rds	1.6621	control1	control	11	7	7	Fibroblasts_1
ATCTACTAGCAAATCA_1	SeuratProject	15738	2160	GSM3823939_control.s1.dgecounts.rds	1.46778	control1	control	7	0	0	Distal tubular cells_1
ATCTACTCAAGCGTAG_1	SeuratProject	18234	2018	GSM3823939_control.s1.dgecounts.rds	17.1877	control1	control	4	4	4	Distal tubular cells_2
ATCTACTCACAAGACG_1	SeuratProject	19904	2101	GSM3823939_control.s1.dgecounts.rds	0.648111	control1	control	7	0	0	Distal tubular cells_1
ATCTACTCAGAAGCAC_1	SeuratProject	11271	1378	GSM3823939_control.s1.dgecounts.rds	1.7301	control1	control	5	5	5	Epithelial cells
ATCTACTCAGTATCTG_1	SeuratProject	31851	3253	GSM3823939_control.s1.dgecounts.rds	9.80503	control1	control	7	0	0	Distal tubular cells_1
ATCTACTGTCTCGTTC_1	SeuratProject	10089	1549	GSM3823939_control.s1.dgecounts.rds	1.38765	control1	control	7	0	0	Distal tubular cells_1
ATCTACTGTGACTACT_1	SeuratProject	13626	1601	GSM3823939_control.s1.dgecounts.rds	1.52649	control1	control	4	4	4	Distal tubular cells_2
ATCTACTGTGCAGTAG_1	SeuratProject	12876	1500	GSM3823939_control.s1.dgecounts.rds	1.21932	control1	control	0	3	3	Intercalated cells
ATCTACTTCAAGATCC_1	SeuratProject	10586	1644	GSM3823939_control.s1.dgecounts.rds	3.14566	control1	control	3	1	1	Proximal tubular cells
ATCTACTTCATCGCTC_1	SeuratProject	18418	2149	GSM3823939_control.s1.dgecounts.rds	0.608101	control1	control	0	3	3	Intercalated cells
ATCTACTTCGGCGGTT_1	SeuratProject	16478	1738	GSM3823939_control.s1.dgecounts.rds	0.910305	control1	control	12	10	10	B cell
ATCTGCCAGGACAGAA_1	SeuratProject	12230	1423	GSM3823939_control.s1.dgecounts.rds	1.02208	control1	control	0	3	3	Intercalated cells
ATCTGCCCACCGTTGG_1	SeuratProject	11992	1537	GSM3823939_control.s1.dgecounts.rds	1.35924	control1	control	0	3	3	Intercalated cells
ATCTGCCGTCAGAATA_1	SeuratProject	16625	2013	GSM3823939_control.s1.dgecounts.rds	1.35338	control1	control	7	0	0	Distal tubular cells_1
ATCTGCCTCCAGTAGT_1	SeuratProject	30987	2785	GSM3823939_control.s1.dgecounts.rds	1.25859	control1	control	5	5	5	Epithelial cells
ATGAGGGAGGATGGAA_1	SeuratProject	13386	1790	GSM3823939_control.s1.dgecounts.rds	4.85582	control1	control	0	3	3	Intercalated cells
ATGAGGGCACAACTGT_1	SeuratProject	14581	1542	GSM3823939_control.s1.dgecounts.rds	1.75571	control1	control	5	5	5	Epithelial cells
ATGAGGGCACCTCGGA_1	SeuratProject	8371	1217	GSM3823939_control.s1.dgecounts.rds	10.9903	control1	control	3	1	1	Proximal tubular cells
ATGAGGGCAGGCTGAA_1	SeuratProject	55440	3852	GSM3823939_control.s1.dgecounts.rds	29.6825	control1	control	7	0	0	Distal tubular cells_1
ATGAGGGCATTCCTCG_1	SeuratProject	11652	1488	GSM3823939_control.s1.dgecounts.rds	3.99073	control1	control	1	2	2	Collecting duct cells
ATGAGGGGTCTAAAGA_1	SeuratProject	8060	1102	GSM3823939_control.s1.dgecounts.rds	6.15385	control1	control	9	8	8	kidney endothelial cells
ATGAGGGGTGCTCTTC_1	SeuratProject	20188	2309	GSM3823939_control.s1.dgecounts.rds	1.98633	control1	control	3	1	1	Proximal tubular cells
ATGAGGGTCACCGGGT_1	SeuratProject	11037	1396	GSM3823939_control.s1.dgecounts.rds	3.87787	control1	control	11	7	7	Fibroblasts_1
ATGCGATAGCCATCGC_1	SeuratProject	15137	1970	GSM3823939_control.s1.dgecounts.rds	0.997556	control1	control	3	1	1	Proximal tubular cells
ATGCGATCAAGCCATT_1	SeuratProject	18422	2274	GSM3823939_control.s1.dgecounts.rds	0.792531	control1	control	3	1	1	Proximal tubular cells
ATGCGATCAAGTCTAC_1	SeuratProject	9212	1208	GSM3823939_control.s1.dgecounts.rds	3.48459	control1	control	5	5	5	Epithelial cells
ATGCGATCAGCGTTCG_1	SeuratProject	18151	2017	GSM3823939_control.s1.dgecounts.rds	0.705195	control1	control	3	1	1	Proximal tubular cells
ATGCGATCAGCTGCAC_1	SeuratProject	19694	2430	GSM3823939_control.s1.dgecounts.rds	0.731187	control1	control	8	6	6	neutrophil
ATGCGATTCCTGCCAT_1	SeuratProject	16253	2039	GSM3823939_control.s1.dgecounts.rds	3.80237	control1	control	7	0	0	Distal tubular cells_1
ATGGGAGAGACGACGT_1	SeuratProject	11116	1470	GSM3823939_control.s1.dgecounts.rds	1.34941	control1	control	7	0	0	Distal tubular cells_1
ATGGGAGAGCTCAACT_1	SeuratProject	12654	1746	GSM3823939_control.s1.dgecounts.rds	0.655919	control1	control	3	1	1	Proximal tubular cells
ATGGGAGGTTCGTTGA_1	SeuratProject	14908	1940	GSM3823939_control.s1.dgecounts.rds	3.44111	control1	control	3	1	1	Proximal tubular cells
ATGGGAGTCACTGGGC_1	SeuratProject	17919	2263	GSM3823939_control.s1.dgecounts.rds	1.17752	control1	control	7	0	0	Distal tubular cells_1
ATGGGAGTCCGCGCAA_1	SeuratProject	14857	1740	GSM3823939_control.s1.dgecounts.rds	1.97213	control1	control	5	5	5	Epithelial cells
ATGGGAGTCCTAGAAC_1	SeuratProject	15886	1800	GSM3823939_control.s1.dgecounts.rds	1.30303	control1	control	5	5	5	Epithelial cells
ATGGGAGTCCTGTACC_1	SeuratProject	12454	1719	GSM3823939_control.s1.dgecounts.rds	1.09202	control1	control	2	0	0	Distal tubular cells_1
ATGTGTGAGGTAAACT_1	SeuratProject	8395	1304	GSM3823939_control.s1.dgecounts.rds	3.50208	control1	control	7	0	0	Distal tubular cells_1
ATGTGTGAGTAAGTAC_1	SeuratProject	16383	2081	GSM3823939_control.s1.dgecounts.rds	1.44662	control1	control	7	0	0	Distal tubular cells_1
ATGTGTGAGTGCGTGA_1	SeuratProject	10187	1461	GSM3823939_control.s1.dgecounts.rds	1.60989	control1	control	11	7	7	Fibroblasts_1
ATGTGTGCAATTCCTT_1	SeuratProject	21158	2577	GSM3823939_control.s1.dgecounts.rds	1.36591	control1	control	3	1	1	Proximal tubular cells
ATGTGTGCATGAACCT_1	SeuratProject	21407	2462	GSM3823939_control.s1.dgecounts.rds	2.32167	control1	control	7	0	0	Distal tubular cells_1
ATGTGTGGTAAAGGAG_1	SeuratProject	51377	4009	GSM3823939_control.s1.dgecounts.rds	19.9253	control1	control	7	0	0	Distal tubular cells_1
ATGTGTGGTCTCACCT_1	SeuratProject	16850	2063	GSM3823939_control.s1.dgecounts.rds	1.78635	control1	control	7	0	0	Distal tubular cells_1
ATGTGTGTCCAACCAA_1	SeuratProject	25021	2528	GSM3823939_control.s1.dgecounts.rds	4.4003	control1	control	4	4	4	Distal tubular cells_2
ATGTGTGTCCTGCCAT_1	SeuratProject	67525	5098	GSM3823939_control.s1.dgecounts.rds	7.20178	control1	control	4	4	4	Distal tubular cells_2
ATGTGTGTCTCCAACC_1	SeuratProject	10937	1376	GSM3823939_control.s1.dgecounts.rds	2.28582	control1	control	0	3	3	Intercalated cells
ATGTGTGTCTCGAGTA_1	SeuratProject	19979	2267	GSM3823939_control.s1.dgecounts.rds	2.25236	control1	control	12	10	10	B cell
ATTACTCAGACAATAC_1	SeuratProject	20373	2239	GSM3823939_control.s1.dgecounts.rds	1.13385	control1	control	0	3	3	Intercalated cells
ATTACTCAGTAGTGCG_1	SeuratProject	20833	2335	GSM3823939_control.s1.dgecounts.rds	0.60001	control1	control	3	1	1	Proximal tubular cells
ATTACTCAGTCTCCTC_1	SeuratProject	9890	1518	GSM3823939_control.s1.dgecounts.rds	1.07179	control1	control	7	0	0	Distal tubular cells_1
ATTACTCCACAAGACG_1	SeuratProject	15822	1593	GSM3823939_control.s1.dgecounts.rds	1.51688	control1	control	5	5	5	Epithelial cells
ATTACTCCATACTACG_1	SeuratProject	13417	1733	GSM3823939_control.s1.dgecounts.rds	2.56391	control1	control	7	0	0	Distal tubular cells_1
ATTACTCCATCGGACC_1	SeuratProject	20957	2449	GSM3823939_control.s1.dgecounts.rds	7.75874	control1	control	3	1	1	Proximal tubular cells
ATTACTCGTCAAACTC_1	SeuratProject	10235	1385	GSM3823939_control.s1.dgecounts.rds	1.319	control1	control	0	3	3	Intercalated cells
ATTACTCGTGCTAGCC_1	SeuratProject	22731	2343	GSM3823939_control.s1.dgecounts.rds	16.9944	control1	control	7	0	0	Distal tubular cells_1
ATTACTCTCCCAAGTA_1	SeuratProject	13856	1837	GSM3823939_control.s1.dgecounts.rds	1.20525	control1	control	7	0	0	Distal tubular cells_1
ATTATCCCAAAGCGGT_1	SeuratProject	22645	2112	GSM3823939_control.s1.dgecounts.rds	27.3482	control1	control	7	0	0	Distal tubular cells_1
ATTATCCCAAGCCGCT_1	SeuratProject	8622	1196	GSM3823939_control.s1.dgecounts.rds	6.35583	control1	control	7	0	0	Distal tubular cells_1
ATTATCCCAGGCAGTA_1	SeuratProject	8049	1203	GSM3823939_control.s1.dgecounts.rds	1.06846	control1	control	3	1	1	Proximal tubular cells
ATTATCCCATGCTGGC_1	SeuratProject	8329	1199	GSM3823939_control.s1.dgecounts.rds	6.87958	control1	control	9	8	8	kidney endothelial cells
ATTATCCGTGGTACAG_1	SeuratProject	14965	1826	GSM3823939_control.s1.dgecounts.rds	0.634815	control1	control	0	3	3	Intercalated cells
ATTATCCTCCAGAGGA_1	SeuratProject	15486	1700	GSM3823939_control.s1.dgecounts.rds	1.08485	control1	control	12	10	10	B cell
ATTCTACAGAAGGGTA_1	SeuratProject	13213	1316	GSM3823939_control.s1.dgecounts.rds	40.9445	control1	control	7	0	0	Distal tubular cells_1
ATTCTACAGTCCGGTC_1	SeuratProject	23405	3027	GSM3823939_control.s1.dgecounts.rds	2.32002	control1	control	7	0	0	Distal tubular cells_1
ATTCTACAGTCTCCTC_1	SeuratProject	8077	1314	GSM3823939_control.s1.dgecounts.rds	2.3276	control1	control	3	1	1	Proximal tubular cells
ATTCTACAGTTGAGAT_1	SeuratProject	19235	2318	GSM3823939_control.s1.dgecounts.rds	2.60983	control1	control	7	0	0	Distal tubular cells_1
ATTCTACCAGACGTAG_1	SeuratProject	25326	2620	GSM3823939_control.s1.dgecounts.rds	1.48069	control1	control	10	9	9	podocytes
ATTCTACCAGAGCCAA_1	SeuratProject	23940	2691	GSM3823939_control.s1.dgecounts.rds	0.609858	control1	control	3	1	1	Proximal tubular cells
ATTCTACCAGGACGTA_1	SeuratProject	14575	1497	GSM3823939_control.s1.dgecounts.rds	0.686106	control1	control	7	0	0	Distal tubular cells_1
ATTCTACGTAAGTGTA_1	SeuratProject	21462	2602	GSM3823939_control.s1.dgecounts.rds	0.6197	control1	control	3	1	1	Proximal tubular cells
ATTCTACGTACAGTGG_1	SeuratProject	7812	1339	GSM3823939_control.s1.dgecounts.rds	1.72811	control1	control	8	6	6	neutrophil
ATTCTACGTATCACCA_1	SeuratProject	16869	2101	GSM3823939_control.s1.dgecounts.rds	12.929	control1	control	8	6	6	neutrophil
ATTCTACGTCGACTAT_1	SeuratProject	11454	1456	GSM3823939_control.s1.dgecounts.rds	0.401606	control1	control	0	3	3	Intercalated cells
ATTCTACGTTCGGCAC_1	SeuratProject	32064	3250	GSM3823939_control.s1.dgecounts.rds	0.776572	control1	control	3	1	1	Proximal tubular cells
ATTCTACTCCAATGGT_1	SeuratProject	59590	4699	GSM3823939_control.s1.dgecounts.rds	13.0911	control1	control	4	4	4	Distal tubular cells_2
ATTCTACTCGAATCCA_1	SeuratProject	19745	2019	GSM3823939_control.s1.dgecounts.rds	1.07369	control1	control	5	5	5	Epithelial cells
ATTCTACTCGCTTAGA_1	SeuratProject	16748	2212	GSM3823939_control.s1.dgecounts.rds	0.823979	control1	control	7	0	0	Distal tubular cells_1
ATTGGACAGATAGGAG_1	SeuratProject	7448	1310	GSM3823939_control.s1.dgecounts.rds	1.9334	control1	control	3	1	1	Proximal tubular cells
ATTGGACAGCGATTCT_1	SeuratProject	20342	2312	GSM3823939_control.s1.dgecounts.rds	0.91928	control1	control	0	3	3	Intercalated cells
ATTGGACAGTGCCAGA_1	SeuratProject	32072	3199	GSM3823939_control.s1.dgecounts.rds	0.296209	control1	control	3	1	1	Proximal tubular cells
ATTGGACCACCTCGGA_1	SeuratProject	18464	2087	GSM3823939_control.s1.dgecounts.rds	0.471187	control1	control	7	0	0	Distal tubular cells_1
ATTGGACGTAGCGTGA_1	SeuratProject	14780	1935	GSM3823939_control.s1.dgecounts.rds	1.1908	control1	control	7	0	0	Distal tubular cells_1
ATTGGACGTAGTGAAT_1	SeuratProject	16294	2080	GSM3823939_control.s1.dgecounts.rds	0.822389	control1	control	7	0	0	Distal tubular cells_1
ATTGGACGTCCATCCT_1	SeuratProject	20337	2536	GSM3823939_control.s1.dgecounts.rds	1.73084	control1	control	9	8	8	kidney endothelial cells
ATTGGACTCCTGCTTG_1	SeuratProject	38652	4202	GSM3823939_control.s1.dgecounts.rds	2.50181	control1	control	8	6	6	neutrophil
ATTGGTGAGAGACTTA_1	SeuratProject	82659	5654	GSM3823939_control.s1.dgecounts.rds	13.4916	control1	control	4	4	4	Distal tubular cells_2
ATTGGTGAGGGAACGG_1	SeuratProject	13244	1757	GSM3823939_control.s1.dgecounts.rds	2.31048	control1	control	5	5	5	Epithelial cells
ATTGGTGCACGCTTTC_1	SeuratProject	9103	1288	GSM3823939_control.s1.dgecounts.rds	2.23003	control1	control	5	5	5	Epithelial cells
ATTGGTGCATGTAAGA_1	SeuratProject	17155	2211	GSM3823939_control.s1.dgecounts.rds	2.61148	control1	control	7	0	0	Distal tubular cells_1
ATTGGTGGTAAAGTCA_1	SeuratProject	17138	2203	GSM3823939_control.s1.dgecounts.rds	1.72716	control1	control	3	1	1	Proximal tubular cells
ATTGGTGTCAAGGCTT_1	SeuratProject	22097	2590	GSM3823939_control.s1.dgecounts.rds	1.41196	control1	control	3	1	1	Proximal tubular cells
ATTTCTGAGCCAACAG_1	SeuratProject	13601	1740	GSM3823939_control.s1.dgecounts.rds	0.860231	control1	control	7	0	0	Distal tubular cells_1
ATTTCTGAGGCAAAGA_1	SeuratProject	28949	3279	GSM3823939_control.s1.dgecounts.rds	0.670144	control1	control	9	8	8	kidney endothelial cells
ATTTCTGCACGAAAGC_1	SeuratProject	18751	2060	GSM3823939_control.s1.dgecounts.rds	3.15183	control1	control	5	5	5	Epithelial cells
ATTTCTGGTCGAATCT_1	SeuratProject	12685	1616	GSM3823939_control.s1.dgecounts.rds	19.7399	control1	control	9	8	8	kidney endothelial cells
ATTTCTGGTGTGGCTC_1	SeuratProject	22145	2392	GSM3823939_control.s1.dgecounts.rds	0.528336	control1	control	0	3	3	Intercalated cells
ATTTCTGGTTGTCGCG_1	SeuratProject	33952	3698	GSM3823939_control.s1.dgecounts.rds	5.60792	control1	control	4	4	4	Distal tubular cells_2
CAACCAAAGCAGACTG_1	SeuratProject	9146	1292	GSM3823939_control.s1.dgecounts.rds	8.70326	control1	control	3	1	1	Proximal tubular cells
CAACCAAAGTCATCCA_1	SeuratProject	9611	1182	GSM3823939_control.s1.dgecounts.rds	1.51909	control1	control	9	8	8	kidney endothelial cells
CAACCAAAGTCCTCCT_1	SeuratProject	11191	1404	GSM3823939_control.s1.dgecounts.rds	0.929318	control1	control	10	9	9	podocytes
CAACCAAAGTTGAGTA_1	SeuratProject	5848	1019	GSM3823939_control.s1.dgecounts.rds	2.12038	control1	control	3	1	1	Proximal tubular cells
CAACCAACACAGCCCA_1	SeuratProject	25045	2589	GSM3823939_control.s1.dgecounts.rds	0.471152	control1	control	3	1	1	Proximal tubular cells
CAACCAACATGGTCTA_1	SeuratProject	21788	2419	GSM3823939_control.s1.dgecounts.rds	0.807784	control1	control	7	0	0	Distal tubular cells_1
CAACCAAGTCTTCTCG_1	SeuratProject	11935	1673	GSM3823939_control.s1.dgecounts.rds	1.44952	control1	control	3	1	1	Proximal tubular cells
CAACCAAGTTCAACCA_1	SeuratProject	58561	4688	GSM3823939_control.s1.dgecounts.rds	1.71104	control1	control	4	4	4	Distal tubular cells_2
CAACCAATCCCTTGTG_1	SeuratProject	12085	1460	GSM3823939_control.s1.dgecounts.rds	1.73769	control1	control	7	0	0	Distal tubular cells_1
CAACCAATCCTCAATT_1	SeuratProject	12313	1572	GSM3823939_control.s1.dgecounts.rds	1.0964	control1	control	0	3	3	Intercalated cells
CAACCAATCTTGCCGT_1	SeuratProject	7997	1010	GSM3823939_control.s1.dgecounts.rds	1.62561	control1	control	0	3	3	Intercalated cells
CAACCTCAGACCACGA_1	SeuratProject	8582	1155	GSM3823939_control.s1.dgecounts.rds	1.07201	control1	control	7	0	0	Distal tubular cells_1
CAACCTCAGATGAGAG_1	SeuratProject	18686	2333	GSM3823939_control.s1.dgecounts.rds	0.866959	control1	control	3	1	1	Proximal tubular cells
CAACCTCAGCAACGGT_1	SeuratProject	65667	5017	GSM3823939_control.s1.dgecounts.rds	3.2878	control1	control	4	4	4	Distal tubular cells_2
CAACCTCCACTGCCAG_1	SeuratProject	19299	2311	GSM3823939_control.s1.dgecounts.rds	0.709881	control1	control	7	0	0	Distal tubular cells_1
CAACCTCGTAAGTAGT_1	SeuratProject	12127	1611	GSM3823939_control.s1.dgecounts.rds	4.27971	control1	control	7	0	0	Distal tubular cells_1
CAACCTCGTCTGCAAT_1	SeuratProject	13747	1522	GSM3823939_control.s1.dgecounts.rds	16.1272	control1	control	7	0	0	Distal tubular cells_1
CAACCTCTCAACGGCC_1	SeuratProject	8044	1276	GSM3823939_control.s1.dgecounts.rds	12.2824	control1	control	3	1	1	Proximal tubular cells
CAACTAGAGGCTCATT_1	SeuratProject	17700	2149	GSM3823939_control.s1.dgecounts.rds	0.757062	control1	control	7	0	0	Distal tubular cells_1
CAACTAGAGGTGTTAA_1	SeuratProject	9473	1335	GSM3823939_control.s1.dgecounts.rds	1.48844	control1	control	7	0	0	Distal tubular cells_1
CAACTAGCAACCGCCA_1	SeuratProject	7632	1132	GSM3823939_control.s1.dgecounts.rds	3.57704	control1	control	7	0	0	Distal tubular cells_1
CAACTAGCACAACGTT_1	SeuratProject	10888	1362	GSM3823939_control.s1.dgecounts.rds	2.76451	control1	control	5	5	5	Epithelial cells
CAACTAGCACCGATAT_1	SeuratProject	16349	1996	GSM3823939_control.s1.dgecounts.rds	2.25702	control1	control	5	5	5	Epithelial cells
CAACTAGGTAAACACA_1	SeuratProject	7497	991	GSM3823939_control.s1.dgecounts.rds	2.0008	control1	control	5	5	5	Epithelial cells
CAACTAGGTCTCCATC_1	SeuratProject	8837	904	GSM3823939_control.s1.dgecounts.rds	0.633699	control1	control	7	0	0	Distal tubular cells_1
CAACTAGGTTTAGCTG_1	SeuratProject	6795	975	GSM3823939_control.s1.dgecounts.rds	3.06107	control1	control	13	11	11	Fibroblasts_2
CAAGAAAAGACCTTTG_1	SeuratProject	17695	2366	GSM3823939_control.s1.dgecounts.rds	0.615993	control1	control	6	1	1	Proximal tubular cells
CAAGAAAAGCTCCCAG_1	SeuratProject	9450	1351	GSM3823939_control.s1.dgecounts.rds	1.13228	control1	control	7	0	0	Distal tubular cells_1
CAAGAAACATCGATGT_1	SeuratProject	10326	1436	GSM3823939_control.s1.dgecounts.rds	1.2977	control1	control	0	3	3	Intercalated cells
CAAGAAATCATCATTC_1	SeuratProject	6998	906	GSM3823939_control.s1.dgecounts.rds	1.71478	control1	control	0	3	3	Intercalated cells
CAAGAAATCCCTAATT_1	SeuratProject	7769	1042	GSM3823939_control.s1.dgecounts.rds	1.33865	control1	control	0	3	3	Intercalated cells
CAAGATCAGCCCTAAT_1	SeuratProject	10080	1226	GSM3823939_control.s1.dgecounts.rds	1.64683	control1	control	5	5	5	Epithelial cells
CAAGATCAGGCCCTTG_1	SeuratProject	20074	2133	GSM3823939_control.s1.dgecounts.rds	0.50812	control1	control	0	3	3	Intercalated cells
CAAGATCAGTCTCAAC_1	SeuratProject	11278	1394	GSM3823939_control.s1.dgecounts.rds	26.0064	control1	control	7	0	0	Distal tubular cells_1
CAAGATCCAACGATCT_1	SeuratProject	9422	1363	GSM3823939_control.s1.dgecounts.rds	4.17109	control1	control	7	0	0	Distal tubular cells_1
CAAGATCCACGTAAGG_1	SeuratProject	29883	3286	GSM3823939_control.s1.dgecounts.rds	0.404912	control1	control	3	1	1	Proximal tubular cells
CAAGATCCATTAGGCT_1	SeuratProject	38854	3667	GSM3823939_control.s1.dgecounts.rds	0.566222	control1	control	5	5	5	Epithelial cells
CAAGATCGTACCATCA_1	SeuratProject	18817	2177	GSM3823939_control.s1.dgecounts.rds	0.818409	control1	control	7	0	0	Distal tubular cells_1
CAAGATCGTCTGATTG_1	SeuratProject	11219	1677	GSM3823939_control.s1.dgecounts.rds	1.40833	control1	control	7	0	0	Distal tubular cells_1
CAAGATCGTTAAAGAC_1	SeuratProject	20728	2373	GSM3823939_control.s1.dgecounts.rds	0.63682	control1	control	0	3	3	Intercalated cells
CAAGGCCAGGCATGGT_1	SeuratProject	26038	3003	GSM3823939_control.s1.dgecounts.rds	0.702819	control1	control	3	1	1	Proximal tubular cells
CAAGGCCCAAGACACG_1	SeuratProject	15495	1816	GSM3823939_control.s1.dgecounts.rds	1.23911	control1	control	7	0	0	Distal tubular cells_1
CAAGGCCCACACTGCG_1	SeuratProject	12835	1600	GSM3823939_control.s1.dgecounts.rds	0.927152	control1	control	3	1	1	Proximal tubular cells
CAAGGCCCAGCGATCC_1	SeuratProject	15177	1863	GSM3823939_control.s1.dgecounts.rds	0.737959	control1	control	7	0	0	Distal tubular cells_1
CAAGGCCCATACTACG_1	SeuratProject	7320	1018	GSM3823939_control.s1.dgecounts.rds	0.669399	control1	control	0	3	3	Intercalated cells
CAAGGCCTCATGCAAC_1	SeuratProject	14058	1827	GSM3823939_control.s1.dgecounts.rds	4.57391	control1	control	7	0	0	Distal tubular cells_1
CAAGGCCTCTGGCGAC_1	SeuratProject	22892	2425	GSM3823939_control.s1.dgecounts.rds	0.768828	control1	control	0	3	3	Intercalated cells
CAAGGCCTCTTCAACT_1	SeuratProject	21622	2292	GSM3823939_control.s1.dgecounts.rds	0.578115	control1	control	0	3	3	Intercalated cells
CAAGTTGAGAGTAATC_1	SeuratProject	17835	2246	GSM3823939_control.s1.dgecounts.rds	1.38492	control1	control	3	1	1	Proximal tubular cells
CAAGTTGAGCGTGTCC_1	SeuratProject	19455	2253	GSM3823939_control.s1.dgecounts.rds	0.447186	control1	control	0	3	3	Intercalated cells
CAAGTTGCATGCATGT_1	SeuratProject	25480	2813	GSM3823939_control.s1.dgecounts.rds	4.26609	control1	control	4	4	4	Distal tubular cells_2
CAAGTTGGTCTTCGTC_1	SeuratProject	13452	1784	GSM3823939_control.s1.dgecounts.rds	2.15581	control1	control	7	0	0	Distal tubular cells_1
CAAGTTGGTGGGTATG_1	SeuratProject	19731	2778	GSM3823939_control.s1.dgecounts.rds	1.30759	control1	control	8	6	6	neutrophil
CAAGTTGGTTACTGAC_1	SeuratProject	30920	2985	GSM3823939_control.s1.dgecounts.rds	8.10802	control1	control	5	5	5	Epithelial cells
CAAGTTGGTTCCACGG_1	SeuratProject	11466	1429	GSM3823939_control.s1.dgecounts.rds	2.30246	control1	control	5	5	5	Epithelial cells
CAAGTTGGTTGTTTGG_1	SeuratProject	17289	2354	GSM3823939_control.s1.dgecounts.rds	0.838684	control1	control	7	0	0	Distal tubular cells_1
CAAGTTGTCATCATTC_1	SeuratProject	16298	2086	GSM3823939_control.s1.dgecounts.rds	1.41122	control1	control	7	0	0	Distal tubular cells_1
CAAGTTGTCGTAGGTT_1	SeuratProject	23175	2613	GSM3823939_control.s1.dgecounts.rds	0.845739	control1	control	7	0	0	Distal tubular cells_1
CACAAACAGAGGGCTT_1	SeuratProject	7049	1132	GSM3823939_control.s1.dgecounts.rds	2.01447	control1	control	3	1	1	Proximal tubular cells
CACAAACAGGCCCTTG_1	SeuratProject	17057	1759	GSM3823939_control.s1.dgecounts.rds	8.77646	control1	control	4	4	4	Distal tubular cells_2
CACAAACAGGTGATTA_1	SeuratProject	13854	1875	GSM3823939_control.s1.dgecounts.rds	2.14379	control1	control	7	0	0	Distal tubular cells_1
CACAAACAGTACACCT_1	SeuratProject	8255	1343	GSM3823939_control.s1.dgecounts.rds	4.74864	control1	control	3	1	1	Proximal tubular cells
CACAAACAGTGCCATT_1	SeuratProject	28639	2883	GSM3823939_control.s1.dgecounts.rds	3.0029	control1	control	5	5	5	Epithelial cells
CACAAACCACCAGTTA_1	SeuratProject	14223	1645	GSM3823939_control.s1.dgecounts.rds	0.752303	control1	control	3	1	1	Proximal tubular cells
CACAAACCACTGCCAG_1	SeuratProject	15928	1835	GSM3823939_control.s1.dgecounts.rds	0.715721	control1	control	11	7	7	Fibroblasts_1
CACAAACGTGGACGAT_1	SeuratProject	20478	2405	GSM3823939_control.s1.dgecounts.rds	1.60172	control1	control	7	0	0	Distal tubular cells_1
CACAAACGTGGTTTCA_1	SeuratProject	17689	2060	GSM3823939_control.s1.dgecounts.rds	0.712307	control1	control	7	0	0	Distal tubular cells_1
CACAAACGTTCCATGA_1	SeuratProject	19687	2350	GSM3823939_control.s1.dgecounts.rds	0.563824	control1	control	3	1	1	Proximal tubular cells
CACAAACTCGCAAACT_1	SeuratProject	23811	2276	GSM3823939_control.s1.dgecounts.rds	8.16429	control1	control	4	4	4	Distal tubular cells_2
CACAAACTCTTATCTG_1	SeuratProject	22122	2795	GSM3823939_control.s1.dgecounts.rds	1.83528	control1	control	7	0	0	Distal tubular cells_1
CACACAAAGAGGTAGA_1	SeuratProject	19182	2131	GSM3823939_control.s1.dgecounts.rds	4.90043	control1	control	4	4	4	Distal tubular cells_2
CACACAACACGCGAAA_1	SeuratProject	7540	1109	GSM3823939_control.s1.dgecounts.rds	2.53316	control1	control	12	10	10	B cell
CACACAACATACAGCT_1	SeuratProject	18907	2475	GSM3823939_control.s1.dgecounts.rds	5.33136	control1	control	7	0	0	Distal tubular cells_1
CACACAAGTGCCTGGT_1	SeuratProject	11634	1447	GSM3823939_control.s1.dgecounts.rds	1.3409	control1	control	0	3	3	Intercalated cells
CACACAATCAAAGACA_1	SeuratProject	15027	1867	GSM3823939_control.s1.dgecounts.rds	1.35756	control1	control	7	0	0	Distal tubular cells_1
CACACAATCCTCAATT_1	SeuratProject	7320	988	GSM3823939_control.s1.dgecounts.rds	0.915301	control1	control	5	5	5	Epithelial cells
CACACAATCGATCCCT_1	SeuratProject	22522	2463	GSM3823939_control.s1.dgecounts.rds	1.16775	control1	control	0	3	3	Intercalated cells
CACACCTAGCCAGTAG_1	SeuratProject	15233	1885	GSM3823939_control.s1.dgecounts.rds	0.840281	control1	control	7	0	0	Distal tubular cells_1
CACACCTAGGCCATAG_1	SeuratProject	12392	1434	GSM3823939_control.s1.dgecounts.rds	1.04906	control1	control	12	10	10	B cell
CACACCTAGGCCCTCA_1	SeuratProject	21630	2454	GSM3823939_control.s1.dgecounts.rds	1.7522	control1	control	10	9	9	podocytes
CACACCTCACAAGCCC_1	SeuratProject	9888	1343	GSM3823939_control.s1.dgecounts.rds	2.25526	control1	control	3	1	1	Proximal tubular cells
CACACCTCATTACGAC_1	SeuratProject	12030	1492	GSM3823939_control.s1.dgecounts.rds	1.19701	control1	control	0	3	3	Intercalated cells
CACACCTGTGGTGTAG_1	SeuratProject	20501	2368	GSM3823939_control.s1.dgecounts.rds	2.46817	control1	control	3	1	1	Proximal tubular cells
CACACTCAGTTACGGG_1	SeuratProject	15413	1865	GSM3823939_control.s1.dgecounts.rds	2.75092	control1	control	5	5	5	Epithelial cells
CACACTCCAATGTTGC_1	SeuratProject	6458	870	GSM3823939_control.s1.dgecounts.rds	2.61691	control1	control	5	5	5	Epithelial cells
CACACTCCAGCTATTG_1	SeuratProject	38734	4091	GSM3823939_control.s1.dgecounts.rds	2.2306	control1	control	4	4	4	Distal tubular cells_2
CACACTCGTCATATCG_1	SeuratProject	7530	1075	GSM3823939_control.s1.dgecounts.rds	1.23506	control1	control	9	8	8	kidney endothelial cells
CACACTCGTCCTAGCG_1	SeuratProject	19672	2212	GSM3823939_control.s1.dgecounts.rds	0.416836	control1	control	0	3	3	Intercalated cells
CACACTCTCAAGGCTT_1	SeuratProject	18700	2166	GSM3823939_control.s1.dgecounts.rds	1.30481	control1	control	7	0	0	Distal tubular cells_1
CACACTCTCGGCGGTT_1	SeuratProject	17912	2349	GSM3823939_control.s1.dgecounts.rds	1.87584	control1	control	8	6	6	neutrophil
CACACTCTCGTTTATC_1	SeuratProject	14138	1658	GSM3823939_control.s1.dgecounts.rds	1.28731	control1	control	0	3	3	Intercalated cells
CACAGGCCACAAGTAA_1	SeuratProject	12207	1618	GSM3823939_control.s1.dgecounts.rds	1.28615	control1	control	7	0	0	Distal tubular cells_1
CACAGGCCACACCGCA_1	SeuratProject	16077	1795	GSM3823939_control.s1.dgecounts.rds	1.14449	control1	control	0	3	3	Intercalated cells
CACAGGCCAGACAAAT_1	SeuratProject	16010	1820	GSM3823939_control.s1.dgecounts.rds	1.31168	control1	control	0	3	3	Intercalated cells
CACAGGCCAGCTTAAC_1	SeuratProject	13150	1723	GSM3823939_control.s1.dgecounts.rds	1.06464	control1	control	7	0	0	Distal tubular cells_1
CACAGGCCATATGAGA_1	SeuratProject	7837	1108	GSM3823939_control.s1.dgecounts.rds	3.509	control1	control	11	7	7	Fibroblasts_1
CACAGGCCATGGAATA_1	SeuratProject	15231	1702	GSM3823939_control.s1.dgecounts.rds	3.76863	control1	control	10	9	9	podocytes
CACAGGCGTAACGTTC_1	SeuratProject	14220	1669	GSM3823939_control.s1.dgecounts.rds	1.23769	control1	control	5	5	5	Epithelial cells
CACAGGCGTCCAGTAT_1	SeuratProject	11522	1689	GSM3823939_control.s1.dgecounts.rds	1.09356	control1	control	0	3	3	Intercalated cells
CACAGGCGTGCACTTA_1	SeuratProject	8901	1133	GSM3823939_control.s1.dgecounts.rds	1.57286	control1	control	13	11	11	Fibroblasts_2
CACAGGCTCAGGCCCA_1	SeuratProject	11293	1556	GSM3823939_control.s1.dgecounts.rds	0.805809	control1	control	11	7	7	Fibroblasts_1
CACAGGCTCTGAGGGA_1	SeuratProject	30729	3225	GSM3823939_control.s1.dgecounts.rds	0.637834	control1	control	7	0	0	Distal tubular cells_1
CACAGTAAGCTACCGC_1	SeuratProject	9503	1204	GSM3823939_control.s1.dgecounts.rds	1.37851	control1	control	0	3	3	Intercalated cells
CACAGTAAGTTAGGTA_1	SeuratProject	7931	1212	GSM3823939_control.s1.dgecounts.rds	3.11436	control1	control	0	3	3	Intercalated cells
CACAGTACATGGTAGG_1	SeuratProject	11107	1478	GSM3823939_control.s1.dgecounts.rds	1.81867	control1	control	11	7	7	Fibroblasts_1
CACAGTAGTGACCAAG_1	SeuratProject	15331	2096	GSM3823939_control.s1.dgecounts.rds	1.73505	control1	control	3	1	1	Proximal tubular cells
CACAGTAGTGAGGCTA_1	SeuratProject	19728	2415	GSM3823939_control.s1.dgecounts.rds	0.694444	control1	control	3	1	1	Proximal tubular cells
CACAGTAGTGTCAATC_1	SeuratProject	20867	2486	GSM3823939_control.s1.dgecounts.rds	0.436095	control1	control	7	0	0	Distal tubular cells_1
CACAGTAGTGTTCTTT_1	SeuratProject	24507	3073	GSM3823939_control.s1.dgecounts.rds	3.93357	control1	control	3	1	1	Proximal tubular cells
CACAGTAGTTACCGAT_1	SeuratProject	26216	2948	GSM3823939_control.s1.dgecounts.rds	0.480623	control1	control	7	0	0	Distal tubular cells_1
CACAGTAGTTGACGTT_1	SeuratProject	14254	1902	GSM3823939_control.s1.dgecounts.rds	1.19265	control1	control	7	0	0	Distal tubular cells_1
CACAGTATCAGTGTTG_1	SeuratProject	20448	2432	GSM3823939_control.s1.dgecounts.rds	0.987872	control1	control	7	0	0	Distal tubular cells_1
CACAGTATCCTTAATC_1	SeuratProject	64741	5264	GSM3823939_control.s1.dgecounts.rds	5.3212	control1	control	11	7	7	Fibroblasts_1
CACATAGAGCTAAGAT_1	SeuratProject	17764	1879	GSM3823939_control.s1.dgecounts.rds	10.1272	control1	control	4	4	4	Distal tubular cells_2
CACATAGAGGGTTCCC_1	SeuratProject	14297	1703	GSM3823939_control.s1.dgecounts.rds	1.38491	control1	control	0	3	3	Intercalated cells
CACATAGCAATCACAC_1	SeuratProject	19526	1969	GSM3823939_control.s1.dgecounts.rds	0.839906	control1	control	10	9	9	podocytes
CACATAGCATCCAACA_1	SeuratProject	14356	1611	GSM3823939_control.s1.dgecounts.rds	0.954305	control1	control	5	5	5	Epithelial cells
CACATAGGTCATCCCT_1	SeuratProject	7756	1195	GSM3823939_control.s1.dgecounts.rds	2.20474	control1	control	3	1	1	Proximal tubular cells
CACATAGGTCTCGTTC_1	SeuratProject	15510	2030	GSM3823939_control.s1.dgecounts.rds	1.34752	control1	control	7	0	0	Distal tubular cells_1
CACATAGGTGACGCCT_1	SeuratProject	14668	1475	GSM3823939_control.s1.dgecounts.rds	10.6627	control1	control	4	4	4	Distal tubular cells_2
CACATAGGTGAGTGAC_1	SeuratProject	11574	1452	GSM3823939_control.s1.dgecounts.rds	1.98721	control1	control	0	3	3	Intercalated cells
CACATAGGTGTGGTTT_1	SeuratProject	20920	2654	GSM3823939_control.s1.dgecounts.rds	1.33843	control1	control	3	1	1	Proximal tubular cells
CACATAGGTTCTCATT_1	SeuratProject	8499	1360	GSM3823939_control.s1.dgecounts.rds	3.20038	control1	control	3	1	1	Proximal tubular cells
CACATAGTCCCTAACC_1	SeuratProject	37825	3640	GSM3823939_control.s1.dgecounts.rds	3.09848	control1	control	4	4	4	Distal tubular cells_2
CACATAGTCTGTACGA_1	SeuratProject	14912	1805	GSM3823939_control.s1.dgecounts.rds	1.01931	control1	control	7	0	0	Distal tubular cells_1
CACATTTAGGGATACC_1	SeuratProject	11407	1408	GSM3823939_control.s1.dgecounts.rds	5.44403	control1	control	4	4	4	Distal tubular cells_2
CACATTTAGTTAACGA_1	SeuratProject	15100	1596	GSM3823939_control.s1.dgecounts.rds	18.543	control1	control	0	3	3	Intercalated cells
CACATTTCACGAAGCA_1	SeuratProject	17855	2165	GSM3823939_control.s1.dgecounts.rds	1.74741	control1	control	0	3	3	Intercalated cells
CACATTTCAGACAAGC_1	SeuratProject	9961	1269	GSM3823939_control.s1.dgecounts.rds	1.05411	control1	control	7	0	0	Distal tubular cells_1
CACATTTCATTTGCCC_1	SeuratProject	6923	966	GSM3823939_control.s1.dgecounts.rds	2.73003	control1	control	9	8	8	kidney endothelial cells
CACATTTGTCTTCAAG_1	SeuratProject	14655	1591	GSM3823939_control.s1.dgecounts.rds	1.0986	control1	control	7	0	0	Distal tubular cells_1
CACATTTGTGCGAAAC_1	SeuratProject	17347	2171	GSM3823939_control.s1.dgecounts.rds	1.38352	control1	control	3	1	1	Proximal tubular cells
CACATTTTCTCAAGTG_1	SeuratProject	21394	2500	GSM3823939_control.s1.dgecounts.rds	1.08442	control1	control	8	6	6	neutrophil
CACCACTAGTCCTCCT_1	SeuratProject	11131	1330	GSM3823939_control.s1.dgecounts.rds	0.341389	control1	control	4	4	4	Distal tubular cells_2
CACCACTCAAGCCTAT_1	SeuratProject	14494	1698	GSM3823939_control.s1.dgecounts.rds	0.93142	control1	control	5	5	5	Epithelial cells
CACCACTGTACTCAAC_1	SeuratProject	18945	2191	GSM3823939_control.s1.dgecounts.rds	1.8844	control1	control	7	0	0	Distal tubular cells_1
CACCAGGAGGTTCCTA_1	SeuratProject	12281	1607	GSM3823939_control.s1.dgecounts.rds	0.863122	control1	control	11	7	7	Fibroblasts_1
CACCAGGCAATCAGAA_1	SeuratProject	9346	1243	GSM3823939_control.s1.dgecounts.rds	2.54654	control1	control	8	6	6	neutrophil
CACCAGGCATACTACG_1	SeuratProject	10974	1572	GSM3823939_control.s1.dgecounts.rds	3.8819	control1	control	7	0	0	Distal tubular cells_1
CACCAGGGTAGTAGTA_1	SeuratProject	20131	2318	GSM3823939_control.s1.dgecounts.rds	1.01833	control1	control	0	3	3	Intercalated cells
CACCAGGGTAGTGAAT_1	SeuratProject	11643	1416	GSM3823939_control.s1.dgecounts.rds	0.996307	control1	control	0	3	3	Intercalated cells
CACCAGGTCACGCGGT_1	SeuratProject	6727	885	GSM3823939_control.s1.dgecounts.rds	16.7237	control1	control	0	3	3	Intercalated cells
CACCTTGAGGCTACGA_1	SeuratProject	26385	2559	GSM3823939_control.s1.dgecounts.rds	18.3475	control1	control	4	4	4	Distal tubular cells_2
CACCTTGAGTTGAGTA_1	SeuratProject	7120	1181	GSM3823939_control.s1.dgecounts.rds	2.64045	control1	control	3	1	1	Proximal tubular cells
CACCTTGAGTTTCCTT_1	SeuratProject	19374	2334	GSM3823939_control.s1.dgecounts.rds	0.655518	control1	control	7	0	0	Distal tubular cells_1
CACCTTGCACCAGTTA_1	SeuratProject	19000	2273	GSM3823939_control.s1.dgecounts.rds	0.594737	control1	control	0	3	3	Intercalated cells
CACCTTGCATCGGACC_1	SeuratProject	13911	1752	GSM3823939_control.s1.dgecounts.rds	1.1286	control1	control	5	5	5	Epithelial cells
CACCTTGGTCTGATTG_1	SeuratProject	21385	2438	GSM3823939_control.s1.dgecounts.rds	3.79705	control1	control	8	6	6	neutrophil
CACCTTGGTGATGTGG_1	SeuratProject	21095	2526	GSM3823939_control.s1.dgecounts.rds	0.426641	control1	control	0	3	3	Intercalated cells
CACCTTGGTTGGACCC_1	SeuratProject	13139	1684	GSM3823939_control.s1.dgecounts.rds	1.07314	control1	control	1	2	2	Collecting duct cells
CACCTTGTCATACGGT_1	SeuratProject	10026	1126	GSM3823939_control.s1.dgecounts.rds	2.37383	control1	control	12	10	10	B cell
CACCTTGTCATATCGG_1	SeuratProject	14153	1638	GSM3823939_control.s1.dgecounts.rds	7.72981	control1	control	4	4	4	Distal tubular cells_2
CACCTTGTCTCTGAGA_1	SeuratProject	9012	1357	GSM3823939_control.s1.dgecounts.rds	2.419	control1	control	3	1	1	Proximal tubular cells
CACCTTGTCTGTGCAA_1	SeuratProject	20694	2431	GSM3823939_control.s1.dgecounts.rds	0.613704	control1	control	3	1	1	Proximal tubular cells
CACTCCAAGAGGGATA_1	SeuratProject	44718	3641	GSM3823939_control.s1.dgecounts.rds	12.7846	control1	control	4	4	4	Distal tubular cells_2
CACTCCAAGCCCTAAT_1	SeuratProject	17056	1837	GSM3823939_control.s1.dgecounts.rds	0.932223	control1	control	0	3	3	Intercalated cells
CACTCCAAGCTTATCG_1	SeuratProject	8729	1100	GSM3823939_control.s1.dgecounts.rds	1.68404	control1	control	13	11	11	Fibroblasts_2
CACTCCACAATCGGTT_1	SeuratProject	5604	811	GSM3823939_control.s1.dgecounts.rds	1.71306	control1	control	5	5	5	Epithelial cells
CACTCCACAATGAAAC_1	SeuratProject	15484	1606	GSM3823939_control.s1.dgecounts.rds	8.64764	control1	control	0	3	3	Intercalated cells
CACTCCACACTACAGT_1	SeuratProject	15440	1770	GSM3823939_control.s1.dgecounts.rds	12.4611	control1	control	10	9	9	podocytes
CACTCCACAGGATCGA_1	SeuratProject	12671	1669	GSM3823939_control.s1.dgecounts.rds	0.560335	control1	control	11	7	7	Fibroblasts_1
CACTCCAGTCGGATCC_1	SeuratProject	12903	1544	GSM3823939_control.s1.dgecounts.rds	1.06952	control1	control	5	5	5	Epithelial cells
CACTCCATCACATGCA_1	SeuratProject	9775	1277	GSM3823939_control.s1.dgecounts.rds	0.849105	control1	control	0	3	3	Intercalated cells
CAGAATCAGCGACGTA_1	SeuratProject	29406	3262	GSM3823939_control.s1.dgecounts.rds	2.71033	control1	control	10	9	9	podocytes
CAGAATCAGTCCTCCT_1	SeuratProject	13571	1935	GSM3823939_control.s1.dgecounts.rds	0.523174	control1	control	8	6	6	neutrophil
CAGAATCAGTGGTAGC_1	SeuratProject	16967	2044	GSM3823939_control.s1.dgecounts.rds	0.701361	control1	control	4	4	4	Distal tubular cells_2
CAGAATCCAAGTAATG_1	SeuratProject	14410	1522	GSM3823939_control.s1.dgecounts.rds	0.957668	control1	control	12	10	10	B cell
CAGAATCCACTTACGA_1	SeuratProject	21402	2278	GSM3823939_control.s1.dgecounts.rds	0.499953	control1	control	3	1	1	Proximal tubular cells
CAGAATCGTATGAATG_1	SeuratProject	19811	2211	GSM3823939_control.s1.dgecounts.rds	1.14583	control1	control	0	3	3	Intercalated cells
CAGAATCGTTCGTCTC_1	SeuratProject	12524	1611	GSM3823939_control.s1.dgecounts.rds	2.06803	control1	control	8	6	6	neutrophil
CAGAATCGTTGGTGGA_1	SeuratProject	14567	1849	GSM3823939_control.s1.dgecounts.rds	0.748267	control1	control	7	0	0	Distal tubular cells_1
CAGAATCTCATCTGTT_1	SeuratProject	11910	1622	GSM3823939_control.s1.dgecounts.rds	1.5869	control1	control	7	0	0	Distal tubular cells_1
CAGAATCTCGCAAGCC_1	SeuratProject	21827	2014	GSM3823939_control.s1.dgecounts.rds	16.6354	control1	control	5	5	5	Epithelial cells
CAGAATCTCGTTTGCC_1	SeuratProject	6775	937	GSM3823939_control.s1.dgecounts.rds	1.01845	control1	control	5	5	5	Epithelial cells
CAGAGAGAGTACGCGA_1	SeuratProject	10460	1582	GSM3823939_control.s1.dgecounts.rds	0.860421	control1	control	8	6	6	neutrophil
CAGAGAGCATTGGTAC_1	SeuratProject	19100	2228	GSM3823939_control.s1.dgecounts.rds	0.968586	control1	control	5	5	5	Epithelial cells
CAGAGAGTCCAGTATG_1	SeuratProject	28619	2056	GSM3823939_control.s1.dgecounts.rds	1.41165	control1	control	7	0	0	Distal tubular cells_1
CAGAGAGTCCGCGGTA_1	SeuratProject	19872	2350	GSM3823939_control.s1.dgecounts.rds	0.689412	control1	control	3	1	1	Proximal tubular cells
CAGATCAAGAAGGTGA_1	SeuratProject	10224	1297	GSM3823939_control.s1.dgecounts.rds	2.03443	control1	control	11	7	7	Fibroblasts_1
CAGATCAAGCCCAACC_1	SeuratProject	8195	1111	GSM3823939_control.s1.dgecounts.rds	2.29408	control1	control	5	5	5	Epithelial cells
CAGATCAAGCCTCGTG_1	SeuratProject	9573	1519	GSM3823939_control.s1.dgecounts.rds	3.47853	control1	control	8	6	6	neutrophil
CAGATCAAGCGATCCC_1	SeuratProject	40604	3887	GSM3823939_control.s1.dgecounts.rds	0.603389	control1	control	10	9	9	podocytes
CAGATCACAAAGGTGC_1	SeuratProject	7586	1217	GSM3823939_control.s1.dgecounts.rds	4.5874	control1	control	2	0	0	Distal tubular cells_1
CAGATCACAATCAGAA_1	SeuratProject	12218	1735	GSM3823939_control.s1.dgecounts.rds	1.98887	control1	control	3	1	1	Proximal tubular cells
CAGATCAGTCTGGAGA_1	SeuratProject	7387	1083	GSM3823939_control.s1.dgecounts.rds	2.13889	control1	control	7	0	0	Distal tubular cells_1
CAGATCAGTTCACGGC_1	SeuratProject	11506	1440	GSM3823939_control.s1.dgecounts.rds	2.5465	control1	control	7	0	0	Distal tubular cells_1
CAGATCATCGCGGATC_1	SeuratProject	15865	1827	GSM3823939_control.s1.dgecounts.rds	1.32367	control1	control	11	7	7	Fibroblasts_1
CAGATCATCGGATGGA_1	SeuratProject	29948	3049	GSM3823939_control.s1.dgecounts.rds	8.57152	control1	control	4	4	4	Distal tubular cells_2
CAGCAGCAGAAGGTTT_1	SeuratProject	18552	1957	GSM3823939_control.s1.dgecounts.rds	0.560586	control1	control	7	0	0	Distal tubular cells_1
CAGCAGCAGTGGTCCC_1	SeuratProject	56248	4421	GSM3823939_control.s1.dgecounts.rds	19.8069	control1	control	7	0	0	Distal tubular cells_1
CAGCAGCCAGGATCGA_1	SeuratProject	17052	1787	GSM3823939_control.s1.dgecounts.rds	0.662679	control1	control	4	4	4	Distal tubular cells_2
CAGCAGCGTCATACTG_1	SeuratProject	16878	2062	GSM3823939_control.s1.dgecounts.rds	0.94798	control1	control	7	0	0	Distal tubular cells_1
CAGCAGCGTCTTGTCC_1	SeuratProject	5828	998	GSM3823939_control.s1.dgecounts.rds	1.50995	control1	control	2	0	0	Distal tubular cells_1
CAGCAGCGTGGCTCCA_1	SeuratProject	12729	1671	GSM3823939_control.s1.dgecounts.rds	1.43766	control1	control	7	0	0	Distal tubular cells_1
CAGCAGCTCACCTCGT_1	SeuratProject	9014	1207	GSM3823939_control.s1.dgecounts.rds	1.10939	control1	control	0	3	3	Intercalated cells
CAGCAGCTCCATTCTA_1	SeuratProject	28322	3085	GSM3823939_control.s1.dgecounts.rds	0.497846	control1	control	3	1	1	Proximal tubular cells
CAGCATAAGCACGCCT_1	SeuratProject	29497	2125	GSM3823939_control.s1.dgecounts.rds	2.85114	control1	control	7	0	0	Distal tubular cells_1
CAGCATAAGCCCAATT_1	SeuratProject	8232	1031	GSM3823939_control.s1.dgecounts.rds	1.39699	control1	control	12	10	10	B cell
CAGCATACACGAAATA_1	SeuratProject	6051	924	GSM3823939_control.s1.dgecounts.rds	6.01553	control1	control	9	8	8	kidney endothelial cells
CAGCATACACGAAGCA_1	SeuratProject	13960	1366	GSM3823939_control.s1.dgecounts.rds	1.03152	control1	control	5	5	5	Epithelial cells
CAGCATACACTGTTAG_1	SeuratProject	16109	1731	GSM3823939_control.s1.dgecounts.rds	1.47743	control1	control	4	4	4	Distal tubular cells_2
CAGCATACAGACGCCT_1	SeuratProject	8838	1155	GSM3823939_control.s1.dgecounts.rds	2.14981	control1	control	5	5	5	Epithelial cells
CAGCATACAGTGACAG_1	SeuratProject	16751	2151	GSM3823939_control.s1.dgecounts.rds	1.27754	control1	control	7	0	0	Distal tubular cells_1
CAGCATAGTCAATGTC_1	SeuratProject	31542	3024	GSM3823939_control.s1.dgecounts.rds	0.459705	control1	control	3	1	1	Proximal tubular cells
CAGCATAGTGGCCCTA_1	SeuratProject	17439	1968	GSM3823939_control.s1.dgecounts.rds	0.722518	control1	control	7	0	0	Distal tubular cells_1
CAGCATAGTGGCTCCA_1	SeuratProject	14014	1526	GSM3823939_control.s1.dgecounts.rds	0.991865	control1	control	5	5	5	Epithelial cells
CAGCATAGTTCGTTGA_1	SeuratProject	18743	2026	GSM3823939_control.s1.dgecounts.rds	0.794963	control1	control	0	3	3	Intercalated cells
CAGCATATCCTGTAGA_1	SeuratProject	7550	1196	GSM3823939_control.s1.dgecounts.rds	1.3245	control1	control	0	3	3	Intercalated cells
CAGCATATCTGTGCAA_1	SeuratProject	23606	2547	GSM3823939_control.s1.dgecounts.rds	0.71592	control1	control	13	11	11	Fibroblasts_2
CAGCCGAAGCGATAGC_1	SeuratProject	17990	2003	GSM3823939_control.s1.dgecounts.rds	1.27293	control1	control	4	4	4	Distal tubular cells_2
CAGCCGAAGCGTTCCG_1	SeuratProject	9503	1171	GSM3823939_control.s1.dgecounts.rds	3.32527	control1	control	5	5	5	Epithelial cells
CAGCCGAAGCTGTCTA_1	SeuratProject	7072	1122	GSM3823939_control.s1.dgecounts.rds	4.72285	control1	control	7	0	0	Distal tubular cells_1
CAGCCGAAGTCTTGCA_1	SeuratProject	14182	1788	GSM3823939_control.s1.dgecounts.rds	1.73459	control1	control	10	9	9	podocytes
CAGCCGACATCATCCC_1	SeuratProject	8598	1123	GSM3823939_control.s1.dgecounts.rds	2.20982	control1	control	0	3	3	Intercalated cells
CAGCCGAGTCTCTCGT_1	SeuratProject	14793	1789	GSM3823939_control.s1.dgecounts.rds	1.16271	control1	control	12	10	10	B cell
CAGCCGAGTGCAGTAG_1	SeuratProject	18817	2135	GSM3823939_control.s1.dgecounts.rds	1.06818	control1	control	0	3	3	Intercalated cells
CAGCCGAGTGGCAAAC_1	SeuratProject	35913	3125	GSM3823939_control.s1.dgecounts.rds	3.70896	control1	control	4	4	4	Distal tubular cells_2
CAGCCGATCGGACAAG_1	SeuratProject	7636	1310	GSM3823939_control.s1.dgecounts.rds	2.00367	control1	control	11	7	7	Fibroblasts_1
CAGCCGATCTATCGCC_1	SeuratProject	15266	2009	GSM3823939_control.s1.dgecounts.rds	1.91275	control1	control	3	1	1	Proximal tubular cells
CAGCGACAGCCTTGAT_1	SeuratProject	13422	1468	GSM3823939_control.s1.dgecounts.rds	9.95381	control1	control	0	3	3	Intercalated cells
CAGCGACAGGTGCAAC_1	SeuratProject	14189	1523	GSM3823939_control.s1.dgecounts.rds	0.775248	control1	control	0	3	3	Intercalated cells
CAGCGACCAAACCCAT_1	SeuratProject	10956	1277	GSM3823939_control.s1.dgecounts.rds	1.26871	control1	control	0	3	3	Intercalated cells
CAGCGACCAAGCGCTC_1	SeuratProject	17433	2146	GSM3823939_control.s1.dgecounts.rds	0.837492	control1	control	7	0	0	Distal tubular cells_1
CAGCGACCACGGTTTA_1	SeuratProject	23447	2851	GSM3823939_control.s1.dgecounts.rds	0.464878	control1	control	7	0	0	Distal tubular cells_1
CAGCGACGTAAGTTCC_1	SeuratProject	11346	1306	GSM3823939_control.s1.dgecounts.rds	1.85969	control1	control	12	10	10	B cell
CAGCGACGTACCCAAT_1	SeuratProject	15979	2066	GSM3823939_control.s1.dgecounts.rds	0.707178	control1	control	3	1	1	Proximal tubular cells
CAGCTAAAGTACCGGA_1	SeuratProject	114433	7125	GSM3823939_control.s1.dgecounts.rds	1.64113	control1	control	5	5	5	Epithelial cells
CAGCTAACACACAGAG_1	SeuratProject	15199	1620	GSM3823939_control.s1.dgecounts.rds	2.96072	control1	control	7	0	0	Distal tubular cells_1
CAGCTAACAGATCTGT_1	SeuratProject	19855	2406	GSM3823939_control.s1.dgecounts.rds	0.634601	control1	control	0	3	3	Intercalated cells
CAGCTAAGTATCACCA_1	SeuratProject	9510	1407	GSM3823939_control.s1.dgecounts.rds	1.29338	control1	control	3	1	1	Proximal tubular cells
CAGCTAAGTCCCGACA_1	SeuratProject	26715	2777	GSM3823939_control.s1.dgecounts.rds	0.602658	control1	control	3	1	1	Proximal tubular cells
CAGCTAAGTTATTCTC_1	SeuratProject	30506	3221	GSM3823939_control.s1.dgecounts.rds	0.826067	control1	control	7	0	0	Distal tubular cells_1
CAGCTGGAGCAAATCA_1	SeuratProject	7028	1180	GSM3823939_control.s1.dgecounts.rds	2.23392	control1	control	3	1	1	Proximal tubular cells
CAGCTGGAGCCAGTAG_1	SeuratProject	28327	3005	GSM3823939_control.s1.dgecounts.rds	8.69135	control1	control	4	4	4	Distal tubular cells_2
CAGCTGGAGGTTACCT_1	SeuratProject	17753	2176	GSM3823939_control.s1.dgecounts.rds	7.70011	control1	control	7	0	0	Distal tubular cells_1
CAGCTGGAGTAATCCC_1	SeuratProject	9855	1254	GSM3823939_control.s1.dgecounts.rds	1.2481	control1	control	0	3	3	Intercalated cells
CAGCTGGAGTGTTGAA_1	SeuratProject	20623	2574	GSM3823939_control.s1.dgecounts.rds	0.562479	control1	control	3	1	1	Proximal tubular cells
CAGCTGGCAATGGAGC_1	SeuratProject	17577	2058	GSM3823939_control.s1.dgecounts.rds	5.30238	control1	control	5	5	5	Epithelial cells
CAGCTGGCACTTAACG_1	SeuratProject	12935	1723	GSM3823939_control.s1.dgecounts.rds	1.16738	control1	control	7	0	0	Distal tubular cells_1
CAGCTGGGTGCGGTAA_1	SeuratProject	10582	1542	GSM3823939_control.s1.dgecounts.rds	1.134	control1	control	0	3	3	Intercalated cells
CAGCTGGGTGCTCTTC_1	SeuratProject	34011	3224	GSM3823939_control.s1.dgecounts.rds	14.9187	control1	control	0	3	3	Intercalated cells
CAGCTGGTCCAAACTG_1	SeuratProject	9055	1296	GSM3823939_control.s1.dgecounts.rds	1.2148	control1	control	1	2	2	Collecting duct cells
CAGGTGCCACGTGAGA_1	SeuratProject	11904	1386	GSM3823939_control.s1.dgecounts.rds	2.77218	control1	control	3	1	1	Proximal tubular cells
CAGGTGCCAGTATAAG_1	SeuratProject	15457	1941	GSM3823939_control.s1.dgecounts.rds	1.11276	control1	control	3	1	1	Proximal tubular cells
CAGGTGCGTAAACACA_1	SeuratProject	18910	2049	GSM3823939_control.s1.dgecounts.rds	1.1211	control1	control	10	9	9	podocytes
CAGGTGCGTCTGCCAG_1	SeuratProject	24335	2893	GSM3823939_control.s1.dgecounts.rds	5.13253	control1	control	4	4	4	Distal tubular cells_2
CAGGTGCGTTAAGACA_1	SeuratProject	23336	2217	GSM3823939_control.s1.dgecounts.rds	3.25677	control1	control	0	3	3	Intercalated cells
CAGGTGCTCCGAATGT_1	SeuratProject	20869	2339	GSM3823939_control.s1.dgecounts.rds	0.737937	control1	control	7	0	0	Distal tubular cells_1
CAGTAACCAAAGCAAT_1	SeuratProject	12229	1641	GSM3823939_control.s1.dgecounts.rds	1.60275	control1	control	7	0	0	Distal tubular cells_1
CAGTAACCAAGCCTAT_1	SeuratProject	9110	1245	GSM3823939_control.s1.dgecounts.rds	0.746432	control1	control	7	0	0	Distal tubular cells_1
CAGTAACGTAGCGCAA_1	SeuratProject	8464	1307	GSM3823939_control.s1.dgecounts.rds	1.47684	control1	control	3	1	1	Proximal tubular cells
CAGTAACTCTCGTTTA_1	SeuratProject	16465	2108	GSM3823939_control.s1.dgecounts.rds	0.825995	control1	control	3	1	1	Proximal tubular cells
CAGTAACTCTGATACG_1	SeuratProject	18327	2319	GSM3823939_control.s1.dgecounts.rds	0.698423	control1	control	3	1	1	Proximal tubular cells
CAGTCCTAGCAAATCA_1	SeuratProject	34067	3281	GSM3823939_control.s1.dgecounts.rds	1.74069	control1	control	3	1	1	Proximal tubular cells
CAGTCCTAGCGTGTCC_1	SeuratProject	7562	985	GSM3823939_control.s1.dgecounts.rds	5.93758	control1	control	5	5	5	Epithelial cells
CAGTCCTCAATCTACG_1	SeuratProject	16645	1971	GSM3823939_control.s1.dgecounts.rds	5.51517	control1	control	2	0	0	Distal tubular cells_1
CAGTCCTCATGACATC_1	SeuratProject	13810	1516	GSM3823939_control.s1.dgecounts.rds	4.25778	control1	control	5	5	5	Epithelial cells
CAGTCCTGTAATCACC_1	SeuratProject	7842	1171	GSM3823939_control.s1.dgecounts.rds	5.31752	control1	control	3	1	1	Proximal tubular cells
CAGTCCTTCGACGGAA_1	SeuratProject	9899	1422	GSM3823939_control.s1.dgecounts.rds	6.40469	control1	control	8	6	6	neutrophil
CATATGGAGACTAGGC_1	SeuratProject	11216	1509	GSM3823939_control.s1.dgecounts.rds	1.19472	control1	control	0	3	3	Intercalated cells
CATATGGAGTCCGGTC_1	SeuratProject	17605	2032	GSM3823939_control.s1.dgecounts.rds	5.54388	control1	control	7	0	0	Distal tubular cells_1
CATATGGCACTCGACG_1	SeuratProject	7284	940	GSM3823939_control.s1.dgecounts.rds	1.96321	control1	control	4	4	4	Distal tubular cells_2
CATATGGCATCACAAC_1	SeuratProject	12813	1628	GSM3823939_control.s1.dgecounts.rds	1.15508	control1	control	7	0	0	Distal tubular cells_1
CATATGGGTTGTCGCG_1	SeuratProject	19986	2304	GSM3823939_control.s1.dgecounts.rds	7.92555	control1	control	4	4	4	Distal tubular cells_2
CATATGGTCACCTTAT_1	SeuratProject	14618	1942	GSM3823939_control.s1.dgecounts.rds	0.889315	control1	control	0	3	3	Intercalated cells
CATATGGTCCAATGGT_1	SeuratProject	10288	1492	GSM3823939_control.s1.dgecounts.rds	2.08981	control1	control	7	0	0	Distal tubular cells_1
CATATGGTCCTTCAAT_1	SeuratProject	11779	1676	GSM3823939_control.s1.dgecounts.rds	1.23949	control1	control	11	7	7	Fibroblasts_1
CATATTCAGTACATGA_1	SeuratProject	10562	1333	GSM3823939_control.s1.dgecounts.rds	1.92198	control1	control	5	5	5	Epithelial cells
CATATTCAGTGAAGTT_1	SeuratProject	20709	1603	GSM3823939_control.s1.dgecounts.rds	42.653	control1	control	7	0	0	Distal tubular cells_1
CATATTCCAGCCTTGG_1	SeuratProject	15640	1984	GSM3823939_control.s1.dgecounts.rds	0.607417	control1	control	3	1	1	Proximal tubular cells
CATCAAGAGATAGCAT_1	SeuratProject	23060	2542	GSM3823939_control.s1.dgecounts.rds	1.9948	control1	control	0	3	3	Intercalated cells
CATCAAGAGCGATTCT_1	SeuratProject	14004	1804	GSM3823939_control.s1.dgecounts.rds	0.735504	control1	control	11	7	7	Fibroblasts_1
CATCAAGAGGCAGTCA_1	SeuratProject	17005	2273	GSM3823939_control.s1.dgecounts.rds	0.764481	control1	control	3	1	1	Proximal tubular cells
CATCAAGCATATGGTC_1	SeuratProject	11569	1592	GSM3823939_control.s1.dgecounts.rds	1.56453	control1	control	5	5	5	Epithelial cells
CATCAAGTCATGCAAC_1	SeuratProject	16243	1775	GSM3823939_control.s1.dgecounts.rds	13.218	control1	control	7	0	0	Distal tubular cells_1
CATCAGAAGAACAATC_1	SeuratProject	11890	1698	GSM3823939_control.s1.dgecounts.rds	2.4979	control1	control	3	1	1	Proximal tubular cells
CATCAGACACAAGTAA_1	SeuratProject	12329	1432	GSM3823939_control.s1.dgecounts.rds	0.892205	control1	control	5	5	5	Epithelial cells
CATCAGACACGGCCAT_1	SeuratProject	11184	1493	GSM3823939_control.s1.dgecounts.rds	2.62876	control1	control	5	5	5	Epithelial cells
CATCAGACAGTGACAG_1	SeuratProject	34111	3722	GSM3823939_control.s1.dgecounts.rds	0.562868	control1	control	6	1	1	Proximal tubular cells
CATCAGACATCCAACA_1	SeuratProject	11273	1566	GSM3823939_control.s1.dgecounts.rds	3.28218	control1	control	7	0	0	Distal tubular cells_1
CATCAGAGTTCAGTAC_1	SeuratProject	10195	1490	GSM3823939_control.s1.dgecounts.rds	0.951447	control1	control	7	0	0	Distal tubular cells_1
CATCAGATCATGTGGT_1	SeuratProject	34867	3183	GSM3823939_control.s1.dgecounts.rds	11.7561	control1	control	4	4	4	Distal tubular cells_2
CATCAGATCGGTGTTA_1	SeuratProject	11373	1726	GSM3823939_control.s1.dgecounts.rds	1.71459	control1	control	7	0	0	Distal tubular cells_1
CATCCACAGGCAATTA_1	SeuratProject	8503	1043	GSM3823939_control.s1.dgecounts.rds	1.85817	control1	control	12	10	10	B cell
CATCCACCACATGACT_1	SeuratProject	12368	1500	GSM3823939_control.s1.dgecounts.rds	1.34217	control1	control	7	0	0	Distal tubular cells_1
CATCCACGTATAGTAG_1	SeuratProject	19019	2368	GSM3823939_control.s1.dgecounts.rds	1.40386	control1	control	7	0	0	Distal tubular cells_1
CATCCACTCGTACCGG_1	SeuratProject	8991	1282	GSM3823939_control.s1.dgecounts.rds	1.82405	control1	control	3	1	1	Proximal tubular cells
CATCCACTCTGTCTAT_1	SeuratProject	6820	1137	GSM3823939_control.s1.dgecounts.rds	0.909091	control1	control	7	0	0	Distal tubular cells_1
CATCGAACATACTCTT_1	SeuratProject	7996	1304	GSM3823939_control.s1.dgecounts.rds	2.08854	control1	control	3	1	1	Proximal tubular cells
CATCGAACATGGTAGG_1	SeuratProject	13033	1602	GSM3823939_control.s1.dgecounts.rds	0.567789	control1	control	0	3	3	Intercalated cells
CATCGAAGTTTAAGCC_1	SeuratProject	18245	2183	GSM3823939_control.s1.dgecounts.rds	0.663195	control1	control	5	5	5	Epithelial cells
CATCGAATCAACACGT_1	SeuratProject	48074	3552	GSM3823939_control.s1.dgecounts.rds	14.9603	control1	control	4	4	4	Distal tubular cells_2
CATCGAATCAGCACAT_1	SeuratProject	22505	2648	GSM3823939_control.s1.dgecounts.rds	0.662075	control1	control	3	1	1	Proximal tubular cells
CATCGAATCAGTTAGC_1	SeuratProject	14068	1838	GSM3823939_control.s1.dgecounts.rds	1.22974	control1	control	7	0	0	Distal tubular cells_1
CATCGAATCCATGCTC_1	SeuratProject	13454	1637	GSM3823939_control.s1.dgecounts.rds	0.743273	control1	control	7	0	0	Distal tubular cells_1
CATCGGGAGCCAGTAG_1	SeuratProject	33843	2616	GSM3823939_control.s1.dgecounts.rds	2.01223	control1	control	5	5	5	Epithelial cells
CATCGGGAGTCAATAG_1	SeuratProject	34282	3313	GSM3823939_control.s1.dgecounts.rds	5.50726	control1	control	4	4	4	Distal tubular cells_2
CATCGGGCAGCTGTAT_1	SeuratProject	10902	1544	GSM3823939_control.s1.dgecounts.rds	2.27481	control1	control	7	0	0	Distal tubular cells_1
CATCGGGCATAAGACA_1	SeuratProject	8804	1466	GSM3823939_control.s1.dgecounts.rds	4.10041	control1	control	9	8	8	kidney endothelial cells
CATCGGGTCACCTTAT_1	SeuratProject	9779	1474	GSM3823939_control.s1.dgecounts.rds	3.35413	control1	control	7	0	0	Distal tubular cells_1
CATCGGGTCAGAAATG_1	SeuratProject	10828	1569	GSM3823939_control.s1.dgecounts.rds	11.5441	control1	control	8	6	6	neutrophil
CATCGGGTCGACAGCC_1	SeuratProject	9518	1228	GSM3823939_control.s1.dgecounts.rds	2.75268	control1	control	5	5	5	Epithelial cells
CATGACAAGAGCTGCA_1	SeuratProject	11748	1703	GSM3823939_control.s1.dgecounts.rds	2.36636	control1	control	7	0	0	Distal tubular cells_1
CATGACAAGGTACTCT_1	SeuratProject	36712	3650	GSM3823939_control.s1.dgecounts.rds	6.60002	control1	control	4	4	4	Distal tubular cells_2
CATGACAGTATGAATG_1	SeuratProject	7713	1113	GSM3823939_control.s1.dgecounts.rds	3.79878	control1	control	6	1	1	Proximal tubular cells
CATGACAGTGAGCGAT_1	SeuratProject	13274	1693	GSM3823939_control.s1.dgecounts.rds	0.497213	control1	control	7	0	0	Distal tubular cells_1
CATGACATCCGTTGCT_1	SeuratProject	13497	1824	GSM3823939_control.s1.dgecounts.rds	0.85945	control1	control	3	1	1	Proximal tubular cells
CATGACATCTACGAGT_1	SeuratProject	5774	811	GSM3823939_control.s1.dgecounts.rds	2.04364	control1	control	0	3	3	Intercalated cells
CATGCCTAGCCGTCGT_1	SeuratProject	7686	1153	GSM3823939_control.s1.dgecounts.rds	2.08171	control1	control	5	5	5	Epithelial cells
CATGCCTAGGCAAAGA_1	SeuratProject	19407	2316	GSM3823939_control.s1.dgecounts.rds	1.3861	control1	control	7	0	0	Distal tubular cells_1
CATGCCTCAAGGTTCT_1	SeuratProject	12831	1410	GSM3823939_control.s1.dgecounts.rds	1.8315	control1	control	12	10	10	B cell
CATGCCTCAATGGAAT_1	SeuratProject	54114	4317	GSM3823939_control.s1.dgecounts.rds	3.16739	control1	control	5	5	5	Epithelial cells
CATGCCTTCCTGTAGA_1	SeuratProject	24677	2897	GSM3823939_control.s1.dgecounts.rds	9.42983	control1	control	8	6	6	neutrophil
CATGCCTTCTAACTTC_1	SeuratProject	28457	3211	GSM3823939_control.s1.dgecounts.rds	1.03314	control1	control	3	1	1	Proximal tubular cells
CATGGCGAGTGCGTGA_1	SeuratProject	8300	1160	GSM3823939_control.s1.dgecounts.rds	1.15663	control1	control	0	3	3	Intercalated cells
CATGGCGGTATGGTTC_1	SeuratProject	20765	1934	GSM3823939_control.s1.dgecounts.rds	30.6814	control1	control	7	0	0	Distal tubular cells_1
CATGGCGTCAGGCCCA_1	SeuratProject	18422	1983	GSM3823939_control.s1.dgecounts.rds	1.53621	control1	control	5	5	5	Epithelial cells
CATGGCGTCATCGATG_1	SeuratProject	9207	1487	GSM3823939_control.s1.dgecounts.rds	3.7037	control1	control	7	0	0	Distal tubular cells_1
CATTATCAGACCGGAT_1	SeuratProject	5895	947	GSM3823939_control.s1.dgecounts.rds	2.03562	control1	control	11	7	7	Fibroblasts_1
CATTATCAGACTAAGT_1	SeuratProject	31571	3146	GSM3823939_control.s1.dgecounts.rds	0.459282	control1	control	3	1	1	Proximal tubular cells
CATTATCAGACTAGGC_1	SeuratProject	26663	2878	GSM3823939_control.s1.dgecounts.rds	7.56104	control1	control	5	5	5	Epithelial cells
CATTATCAGACTTTCG_1	SeuratProject	13040	1650	GSM3823939_control.s1.dgecounts.rds	1.70245	control1	control	0	3	3	Intercalated cells
CATTATCAGCTAACTC_1	SeuratProject	10711	1506	GSM3823939_control.s1.dgecounts.rds	1.5218	control1	control	3	1	1	Proximal tubular cells
CATTATCAGTGGACGT_1	SeuratProject	15067	1747	GSM3823939_control.s1.dgecounts.rds	0.736709	control1	control	3	1	1	Proximal tubular cells
CATTATCCAACACCCG_1	SeuratProject	18271	2022	GSM3823939_control.s1.dgecounts.rds	0.640359	control1	control	0	3	3	Intercalated cells
CATTATCCACAAGCCC_1	SeuratProject	7603	1077	GSM3823939_control.s1.dgecounts.rds	1.14429	control1	control	11	7	7	Fibroblasts_1
CATTATCCAGTCAGCC_1	SeuratProject	29129	3067	GSM3823939_control.s1.dgecounts.rds	0.858251	control1	control	5	5	5	Epithelial cells
CATTATCGTGACTCAT_1	SeuratProject	17669	1994	GSM3823939_control.s1.dgecounts.rds	1.76014	control1	control	10	9	9	podocytes
CATTATCGTTTCCACC_1	SeuratProject	15497	1780	GSM3823939_control.s1.dgecounts.rds	2.2585	control1	control	5	5	5	Epithelial cells
CATTATCTCGAATCCA_1	SeuratProject	9880	1385	GSM3823939_control.s1.dgecounts.rds	1.28543	control1	control	11	7	7	Fibroblasts_1
CATTCGCAGGAGTACC_1	SeuratProject	7322	1072	GSM3823939_control.s1.dgecounts.rds	2.74515	control1	control	9	8	8	kidney endothelial cells
CATTCGCCAGGGCATA_1	SeuratProject	8011	1146	GSM3823939_control.s1.dgecounts.rds	1.28573	control1	control	11	7	7	Fibroblasts_1
CATTCGCCATGGGACA_1	SeuratProject	22968	2881	GSM3823939_control.s1.dgecounts.rds	0.561651	control1	control	3	1	1	Proximal tubular cells
CATTCGCGTAGCGCTC_1	SeuratProject	10553	1502	GSM3823939_control.s1.dgecounts.rds	0.976026	control1	control	7	0	0	Distal tubular cells_1
CATTCGCGTATTACCG_1	SeuratProject	20169	2251	GSM3823939_control.s1.dgecounts.rds	11.0417	control1	control	4	4	4	Distal tubular cells_2
CATTCGCGTCGATTGT_1	SeuratProject	6258	1011	GSM3823939_control.s1.dgecounts.rds	0.591243	control1	control	13	11	11	Fibroblasts_2
CATTCGCGTTATCCGA_1	SeuratProject	28426	2780	GSM3823939_control.s1.dgecounts.rds	12.091	control1	control	0	3	3	Intercalated cells
CATTCGCTCTACTTAC_1	SeuratProject	18160	2275	GSM3823939_control.s1.dgecounts.rds	0.418502	control1	control	0	3	3	Intercalated cells
CCAATCCAGAGTCTGG_1	SeuratProject	16747	1845	GSM3823939_control.s1.dgecounts.rds	0.531438	control1	control	5	5	5	Epithelial cells
CCAATCCAGGTAGCCA_1	SeuratProject	9241	1255	GSM3823939_control.s1.dgecounts.rds	1.42842	control1	control	11	7	7	Fibroblasts_1
CCAATCCAGTACATGA_1	SeuratProject	14136	1619	GSM3823939_control.s1.dgecounts.rds	8.58093	control1	control	5	5	5	Epithelial cells
CCAATCCCAATGTAAG_1	SeuratProject	11438	1540	GSM3823939_control.s1.dgecounts.rds	1.14531	control1	control	7	0	0	Distal tubular cells_1
CCAATCCCAGCTGCAC_1	SeuratProject	8724	1246	GSM3823939_control.s1.dgecounts.rds	1.18065	control1	control	2	0	0	Distal tubular cells_1
CCAATCCCAGTGGAGT_1	SeuratProject	7693	1046	GSM3823939_control.s1.dgecounts.rds	2.01482	control1	control	5	5	5	Epithelial cells
CCAATCCGTATAGGGC_1	SeuratProject	13782	1686	GSM3823939_control.s1.dgecounts.rds	3.19257	control1	control	5	5	5	Epithelial cells
CCAATCCGTGATGCCC_1	SeuratProject	11307	1403	GSM3823939_control.s1.dgecounts.rds	2.18449	control1	control	0	3	3	Intercalated cells
CCAATCCGTTAGTGGG_1	SeuratProject	13179	1501	GSM3823939_control.s1.dgecounts.rds	1.27476	control1	control	11	7	7	Fibroblasts_1
CCACCTACACATGACT_1	SeuratProject	15947	1652	GSM3823939_control.s1.dgecounts.rds	0.802659	control1	control	7	0	0	Distal tubular cells_1
CCACCTACACTGTGTA_1	SeuratProject	12327	1497	GSM3823939_control.s1.dgecounts.rds	1.04648	control1	control	11	7	7	Fibroblasts_1
CCACCTACAGGGATTG_1	SeuratProject	17455	1999	GSM3823939_control.s1.dgecounts.rds	1.1057	control1	control	7	0	0	Distal tubular cells_1
CCACCTACAGTAAGAT_1	SeuratProject	15193	1459	GSM3823939_control.s1.dgecounts.rds	1.0597	control1	control	0	3	3	Intercalated cells
CCACCTACATGCAATC_1	SeuratProject	19840	1422	GSM3823939_control.s1.dgecounts.rds	14.496	control1	control	4	4	4	Distal tubular cells_2
CCACCTAGTCCAGTAT_1	SeuratProject	17286	1671	GSM3823939_control.s1.dgecounts.rds	0.780979	control1	control	7	0	0	Distal tubular cells_1
CCACCTATCATGTCCC_1	SeuratProject	23416	2626	GSM3823939_control.s1.dgecounts.rds	0.576529	control1	control	3	1	1	Proximal tubular cells
CCACCTATCCACGTGG_1	SeuratProject	21748	1983	GSM3823939_control.s1.dgecounts.rds	1.59095	control1	control	7	0	0	Distal tubular cells_1
CCACCTATCGCGTTTC_1	SeuratProject	10855	1007	GSM3823939_control.s1.dgecounts.rds	2.9848	control1	control	6	1	1	Proximal tubular cells
CCACCTATCTACCTGC_1	SeuratProject	17076	2027	GSM3823939_control.s1.dgecounts.rds	6.33638	control1	control	4	4	4	Distal tubular cells_2
CCACGGAAGCTCAACT_1	SeuratProject	12668	1464	GSM3823939_control.s1.dgecounts.rds	0.836754	control1	control	5	5	5	Epithelial cells
CCACGGAAGGAGTTTA_1	SeuratProject	23809	2785	GSM3823939_control.s1.dgecounts.rds	4.99811	control1	control	7	0	0	Distal tubular cells_1
CCACGGAAGTGGGATC_1	SeuratProject	12348	1352	GSM3823939_control.s1.dgecounts.rds	0.453515	control1	control	7	0	0	Distal tubular cells_1
CCACGGACAACGCACC_1	SeuratProject	11915	1604	GSM3823939_control.s1.dgecounts.rds	0.948384	control1	control	7	0	0	Distal tubular cells_1
CCACGGACACGCTTTC_1	SeuratProject	16544	1610	GSM3823939_control.s1.dgecounts.rds	26.3842	control1	control	0	3	3	Intercalated cells
CCACGGAGTCTGATCA_1	SeuratProject	16085	1736	GSM3823939_control.s1.dgecounts.rds	0.777122	control1	control	12	10	10	B cell
CCACGGAGTGATGATA_1	SeuratProject	21590	2626	GSM3823939_control.s1.dgecounts.rds	0.592867	control1	control	3	1	1	Proximal tubular cells
CCACGGAGTTAAGAAC_1	SeuratProject	18048	1934	GSM3823939_control.s1.dgecounts.rds	0.936392	control1	control	5	5	5	Epithelial cells
CCACGGATCAATACCG_1	SeuratProject	18459	2119	GSM3823939_control.s1.dgecounts.rds	8.31573	control1	control	7	0	0	Distal tubular cells_1
CCACGGATCCAGAGGA_1	SeuratProject	44785	4115	GSM3823939_control.s1.dgecounts.rds	3.64854	control1	control	5	5	5	Epithelial cells
CCACGGATCGGCGGTT_1	SeuratProject	15124	1903	GSM3823939_control.s1.dgecounts.rds	1.13065	control1	control	5	5	5	Epithelial cells
CCACGGATCGTGACAT_1	SeuratProject	21424	2268	GSM3823939_control.s1.dgecounts.rds	6.88947	control1	control	4	4	4	Distal tubular cells_2
CCACTACAGTGGTAAT_1	SeuratProject	18363	2111	GSM3823939_control.s1.dgecounts.rds	0.495562	control1	control	7	0	0	Distal tubular cells_1
CCACTACCACGTCTCT_1	SeuratProject	16591	1819	GSM3823939_control.s1.dgecounts.rds	0.554518	control1	control	5	5	5	Epithelial cells
CCACTACCATGGTCAT_1	SeuratProject	12251	1563	GSM3823939_control.s1.dgecounts.rds	1.46927	control1	control	5	5	5	Epithelial cells
CCACTACGTTCAGACT_1	SeuratProject	16163	1953	GSM3823939_control.s1.dgecounts.rds	0.699128	control1	control	0	3	3	Intercalated cells
CCACTACTCCCTCTTT_1	SeuratProject	7887	1121	GSM3823939_control.s1.dgecounts.rds	4.46304	control1	control	13	11	11	Fibroblasts_2
CCACTACTCCTAGTGA_1	SeuratProject	14873	1695	GSM3823939_control.s1.dgecounts.rds	0.806831	control1	control	0	3	3	Intercalated cells
CCAGCGAAGATCACGG_1	SeuratProject	6696	985	GSM3823939_control.s1.dgecounts.rds	3.91278	control1	control	9	8	8	kidney endothelial cells
CCAGCGAAGGCCGAAT_1	SeuratProject	15780	2105	GSM3823939_control.s1.dgecounts.rds	3.92902	control1	control	9	8	8	kidney endothelial cells
CCAGCGAAGTCCTCCT_1	SeuratProject	18484	2241	GSM3823939_control.s1.dgecounts.rds	0.65462	control1	control	0	3	3	Intercalated cells
CCAGCGAAGTCGAGTG_1	SeuratProject	15725	1722	GSM3823939_control.s1.dgecounts.rds	0.947536	control1	control	12	10	10	B cell
CCAGCGACACCTCGGA_1	SeuratProject	19876	2314	GSM3823939_control.s1.dgecounts.rds	0.714429	control1	control	7	0	0	Distal tubular cells_1
CCAGCGACAGGGTTAG_1	SeuratProject	8771	1270	GSM3823939_control.s1.dgecounts.rds	3.7852	control1	control	7	0	0	Distal tubular cells_1
CCAGCGACATGAGCGA_1	SeuratProject	9121	1003	GSM3823939_control.s1.dgecounts.rds	1.58974	control1	control	11	7	7	Fibroblasts_1
CCAGCGAGTGGTCTCG_1	SeuratProject	17892	1968	GSM3823939_control.s1.dgecounts.rds	0.564498	control1	control	0	3	3	Intercalated cells
CCAGCGAGTGTCGCTG_1	SeuratProject	8246	1162	GSM3823939_control.s1.dgecounts.rds	0.739753	control1	control	11	7	7	Fibroblasts_1
CCAGCGATCAGCAACT_1	SeuratProject	10962	1492	GSM3823939_control.s1.dgecounts.rds	1.93395	control1	control	9	8	8	kidney endothelial cells
CCATGTCCATACTACG_1	SeuratProject	11215	1390	GSM3823939_control.s1.dgecounts.rds	10.8159	control1	control	4	4	4	Distal tubular cells_2
CCATGTCCATGGTCTA_1	SeuratProject	9714	1430	GSM3823939_control.s1.dgecounts.rds	1.64711	control1	control	7	0	0	Distal tubular cells_1
CCATGTCGTCTGCCAG_1	SeuratProject	11664	1545	GSM3823939_control.s1.dgecounts.rds	2.24623	control1	control	7	0	0	Distal tubular cells_1
CCATGTCGTTTAGGAA_1	SeuratProject	26659	2857	GSM3823939_control.s1.dgecounts.rds	0.892757	control1	control	10	9	9	podocytes
CCATGTCGTTTGGGCC_1	SeuratProject	23356	2779	GSM3823939_control.s1.dgecounts.rds	0.475253	control1	control	7	0	0	Distal tubular cells_1
CCATTCGAGAACTCGG_1	SeuratProject	9753	1383	GSM3823939_control.s1.dgecounts.rds	1.89685	control1	control	3	1	1	Proximal tubular cells
CCATTCGAGCCAGTAG_1	SeuratProject	7628	1251	GSM3823939_control.s1.dgecounts.rds	2.5957	control1	control	8	6	6	neutrophil
CCATTCGAGGCGTACA_1	SeuratProject	18573	1868	GSM3823939_control.s1.dgecounts.rds	7.36553	control1	control	4	4	4	Distal tubular cells_2
CCATTCGGTAAAGGAG_1	SeuratProject	37364	3893	GSM3823939_control.s1.dgecounts.rds	2.60679	control1	control	5	5	5	Epithelial cells
CCATTCGTCAACGGCC_1	SeuratProject	12825	1484	GSM3823939_control.s1.dgecounts.rds	4.73294	control1	control	0	3	3	Intercalated cells
CCATTCGTCCATGAAC_1	SeuratProject	30604	3031	GSM3823939_control.s1.dgecounts.rds	13.5048	control1	control	7	0	0	Distal tubular cells_1
CCATTCGTCCGTTGTC_1	SeuratProject	15803	2182	GSM3823939_control.s1.dgecounts.rds	0.480921	control1	control	3	1	1	Proximal tubular cells
CCCAATCAGACAGGCT_1	SeuratProject	6819	1023	GSM3823939_control.s1.dgecounts.rds	0.80657	control1	control	7	0	0	Distal tubular cells_1
CCCAATCAGATAGGAG_1	SeuratProject	7288	957	GSM3823939_control.s1.dgecounts.rds	1.27607	control1	control	0	3	3	Intercalated cells
CCCAATCAGATCGGGT_1	SeuratProject	76953	5755	GSM3823939_control.s1.dgecounts.rds	8.85735	control1	control	5	5	5	Epithelial cells
CCCAATCAGGGATACC_1	SeuratProject	10903	1158	GSM3823939_control.s1.dgecounts.rds	9.99725	control1	control	4	4	4	Distal tubular cells_2
CCCAATCCACATGTGT_1	SeuratProject	15608	1949	GSM3823939_control.s1.dgecounts.rds	1.29421	control1	control	0	3	3	Intercalated cells
CCCAATCCACCGTTGG_1	SeuratProject	18362	1980	GSM3823939_control.s1.dgecounts.rds	1.32339	control1	control	10	9	9	podocytes
CCCAATCCACTTCGAA_1	SeuratProject	10016	1369	GSM3823939_control.s1.dgecounts.rds	1.64736	control1	control	9	8	8	kidney endothelial cells
CCCAATCCATTGGTAC_1	SeuratProject	18567	1906	GSM3823939_control.s1.dgecounts.rds	0.425486	control1	control	2	0	0	Distal tubular cells_1
CCCAATCGTCAGAATA_1	SeuratProject	7600	1153	GSM3823939_control.s1.dgecounts.rds	0.815789	control1	control	3	1	1	Proximal tubular cells
CCCAATCGTCTAAAGA_1	SeuratProject	9040	1377	GSM3823939_control.s1.dgecounts.rds	1.65929	control1	control	7	0	0	Distal tubular cells_1
CCCAATCTCCTATTCA_1	SeuratProject	10190	1536	GSM3823939_control.s1.dgecounts.rds	2.28656	control1	control	6	1	1	Proximal tubular cells
CCCAATCTCGCGGATC_1	SeuratProject	17859	1998	GSM3823939_control.s1.dgecounts.rds	0.940702	control1	control	0	3	3	Intercalated cells
CCCAATCTCTACTCAT_1	SeuratProject	8983	1136	GSM3823939_control.s1.dgecounts.rds	1.51397	control1	control	5	5	5	Epithelial cells
CCCAGTTAGTCGCCGT_1	SeuratProject	6840	909	GSM3823939_control.s1.dgecounts.rds	1.50585	control1	control	12	10	10	B cell
CCCAGTTCAGCTTAAC_1	SeuratProject	10359	1150	GSM3823939_control.s1.dgecounts.rds	1.41906	control1	control	2	0	0	Distal tubular cells_1
CCCAGTTCAGTCAGAG_1	SeuratProject	9844	1228	GSM3823939_control.s1.dgecounts.rds	1.80821	control1	control	5	5	5	Epithelial cells
CCCAGTTCATTTGCTT_1	SeuratProject	33263	3788	GSM3823939_control.s1.dgecounts.rds	2.49827	control1	control	11	7	7	Fibroblasts_1
CCCAGTTGTCGCGGTT_1	SeuratProject	12381	1614	GSM3823939_control.s1.dgecounts.rds	10.9038	control1	control	4	4	4	Distal tubular cells_2
CCCAGTTGTCTAACGT_1	SeuratProject	7779	1070	GSM3823939_control.s1.dgecounts.rds	0.437074	control1	control	0	3	3	Intercalated cells
CCCAGTTTCTCATTCA_1	SeuratProject	22629	2558	GSM3823939_control.s1.dgecounts.rds	9.03708	control1	control	0	3	3	Intercalated cells
CCCTCCTAGACAGACC_1	SeuratProject	10803	1407	GSM3823939_control.s1.dgecounts.rds	2.67518	control1	control	5	5	5	Epithelial cells
CCCTCCTAGTCAAGCG_1	SeuratProject	17489	2055	GSM3823939_control.s1.dgecounts.rds	2.56733	control1	control	0	3	3	Intercalated cells
CCCTCCTAGTGAAGAG_1	SeuratProject	25436	3003	GSM3823939_control.s1.dgecounts.rds	1.47036	control1	control	11	7	7	Fibroblasts_1
CCCTCCTAGTTTAGGA_1	SeuratProject	13350	1678	GSM3823939_control.s1.dgecounts.rds	18.0974	control1	control	7	0	0	Distal tubular cells_1
CCCTCCTCACCAGCAC_1	SeuratProject	15538	2041	GSM3823939_control.s1.dgecounts.rds	2.23967	control1	control	3	1	1	Proximal tubular cells
CCCTCCTCACGGTAGA_1	SeuratProject	35960	3644	GSM3823939_control.s1.dgecounts.rds	12.2136	control1	control	7	0	0	Distal tubular cells_1
CCCTCCTCCGATCTCC_1	SeuratProject	10247	1257	GSM3823939_control.s1.dgecounts.rds	16.0047	control1	control	6	1	1	Proximal tubular cells
CCCTCCTGTTGTGGCC_1	SeuratProject	17590	1990	GSM3823939_control.s1.dgecounts.rds	1.98977	control1	control	5	5	5	Epithelial cells
CCCTCCTTCAGGCAAG_1	SeuratProject	36348	3596	GSM3823939_control.s1.dgecounts.rds	0.830857	control1	control	4	4	4	Distal tubular cells_2
CCCTCCTTCAGGTTCA_1	SeuratProject	15273	2276	GSM3823939_control.s1.dgecounts.rds	1.72199	control1	control	3	1	1	Proximal tubular cells
CCCTCCTTCCAACCAA_1	SeuratProject	9285	1219	GSM3823939_control.s1.dgecounts.rds	3.47873	control1	control	7	0	0	Distal tubular cells_1
CCCTCCTTCCATGCTC_1	SeuratProject	7072	1034	GSM3823939_control.s1.dgecounts.rds	0.49491	control1	control	0	3	3	Intercalated cells
CCCTCCTTCTGTTTGT_1	SeuratProject	94896	6875	GSM3823939_control.s1.dgecounts.rds	0.992666	control1	control	10	9	9	podocytes
CCGGGATAGCACACAG_1	SeuratProject	14183	1786	GSM3823939_control.s1.dgecounts.rds	3.25037	control1	control	7	0	0	Distal tubular cells_1
CCGGGATCAAGAGGCT_1	SeuratProject	8520	1266	GSM3823939_control.s1.dgecounts.rds	3.36854	control1	control	7	0	0	Distal tubular cells_1
CCGGGATGTTTGTTTC_1	SeuratProject	16408	2411	GSM3823939_control.s1.dgecounts.rds	1.14578	control1	control	11	7	7	Fibroblasts_1
CCGGTAGAGCAAATCA_1	SeuratProject	18728	2433	GSM3823939_control.s1.dgecounts.rds	2.62708	control1	control	9	8	8	kidney endothelial cells
CCGGTAGAGCGGCTTC_1	SeuratProject	14560	2212	GSM3823939_control.s1.dgecounts.rds	9.51923	control1	control	10	9	9	podocytes
CCGGTAGCAGCCTGTG_1	SeuratProject	17190	1974	GSM3823939_control.s1.dgecounts.rds	1.25654	control1	control	7	0	0	Distal tubular cells_1
CCGGTAGTCAATAAGG_1	SeuratProject	10545	1340	GSM3823939_control.s1.dgecounts.rds	1.94405	control1	control	5	5	5	Epithelial cells
CCGGTAGTCCAGGGCT_1	SeuratProject	17508	2030	GSM3823939_control.s1.dgecounts.rds	4.03815	control1	control	4	4	4	Distal tubular cells_2
CCGGTAGTCTGTCCGT_1	SeuratProject	17255	1702	GSM3823939_control.s1.dgecounts.rds	1.90669	control1	control	10	9	9	podocytes
CCGTACTAGAAGGCCT_1	SeuratProject	5645	773	GSM3823939_control.s1.dgecounts.rds	0.655447	control1	control	5	5	5	Epithelial cells
CCGTACTAGAGTTGGC_1	SeuratProject	14607	1912	GSM3823939_control.s1.dgecounts.rds	0.8626	control1	control	7	0	0	Distal tubular cells_1
CCGTACTAGGTCATCT_1	SeuratProject	14520	1691	GSM3823939_control.s1.dgecounts.rds	0.977961	control1	control	7	0	0	Distal tubular cells_1
CCGTACTCAAATTGCC_1	SeuratProject	6740	974	GSM3823939_control.s1.dgecounts.rds	1.52819	control1	control	9	8	8	kidney endothelial cells
CCGTACTGTCGAAAGC_1	SeuratProject	10158	1181	GSM3823939_control.s1.dgecounts.rds	1.35854	control1	control	11	7	7	Fibroblasts_1
CCGTACTTCAGCTCGG_1	SeuratProject	15627	1798	GSM3823939_control.s1.dgecounts.rds	0.761503	control1	control	10	9	9	podocytes
CCGTACTTCATGTCCC_1	SeuratProject	20632	2174	GSM3823939_control.s1.dgecounts.rds	1.17294	control1	control	0	3	3	Intercalated cells
CCGTACTTCCTTTACA_1	SeuratProject	6947	1189	GSM3823939_control.s1.dgecounts.rds	1.26673	control1	control	9	8	8	kidney endothelial cells
CCGTACTTCGACGGAA_1	SeuratProject	13715	1733	GSM3823939_control.s1.dgecounts.rds	2.69048	control1	control	7	0	0	Distal tubular cells_1
CCGTGGAAGACAAGCC_1	SeuratProject	8401	1424	GSM3823939_control.s1.dgecounts.rds	1.21414	control1	control	3	1	1	Proximal tubular cells
CCGTGGAAGGATGCGT_1	SeuratProject	12526	1580	GSM3823939_control.s1.dgecounts.rds	1.8282	control1	control	5	5	5	Epithelial cells
CCGTGGAAGTAGGTGC_1	SeuratProject	10107	1197	GSM3823939_control.s1.dgecounts.rds	12.6348	control1	control	4	4	4	Distal tubular cells_2
CCGTGGACAATGCCAT_1	SeuratProject	19405	2011	GSM3823939_control.s1.dgecounts.rds	1.29348	control1	control	5	5	5	Epithelial cells
CCGTGGACACGAAATA_1	SeuratProject	12732	1714	GSM3823939_control.s1.dgecounts.rds	0.824694	control1	control	7	0	0	Distal tubular cells_1
CCGTGGACACTCGACG_1	SeuratProject	18964	2272	GSM3823939_control.s1.dgecounts.rds	1.38157	control1	control	0	3	3	Intercalated cells
CCGTGGACAGATCTGT_1	SeuratProject	10766	1450	GSM3823939_control.s1.dgecounts.rds	0.780234	control1	control	7	0	0	Distal tubular cells_1
CCGTGGACATGCAATC_1	SeuratProject	11805	1253	GSM3823939_control.s1.dgecounts.rds	35.4765	control1	control	0	3	3	Intercalated cells
CCGTGGATCCTAGAAC_1	SeuratProject	14030	1676	GSM3823939_control.s1.dgecounts.rds	0.912331	control1	control	7	0	0	Distal tubular cells_1
CCGTGGATCTCTTGAT_1	SeuratProject	21819	2845	GSM3823939_control.s1.dgecounts.rds	1.15496	control1	control	6	1	1	Proximal tubular cells
CCGTTCAAGAACTCGG_1	SeuratProject	18977	1927	GSM3823939_control.s1.dgecounts.rds	12.0567	control1	control	4	4	4	Distal tubular cells_2
CCGTTCAAGCTACCGC_1	SeuratProject	13293	1720	GSM3823939_control.s1.dgecounts.rds	0.383661	control1	control	7	0	0	Distal tubular cells_1
CCGTTCAAGGATGGTC_1	SeuratProject	12311	1532	GSM3823939_control.s1.dgecounts.rds	1.29965	control1	control	0	3	3	Intercalated cells
CCGTTCAAGGTGCAAC_1	SeuratProject	10882	1353	GSM3823939_control.s1.dgecounts.rds	1.45194	control1	control	5	5	5	Epithelial cells
CCGTTCACATTTGCCC_1	SeuratProject	13048	1795	GSM3823939_control.s1.dgecounts.rds	2.98896	control1	control	7	0	0	Distal tubular cells_1
CCGTTCAGTATCAGTC_1	SeuratProject	7585	1158	GSM3823939_control.s1.dgecounts.rds	2.32037	control1	control	11	7	7	Fibroblasts_1
CCGTTCAGTGGCAAAC_1	SeuratProject	68710	4970	GSM3823939_control.s1.dgecounts.rds	4.26867	control1	control	4	4	4	Distal tubular cells_2
CCTAAAGAGCTTTGGT_1	SeuratProject	14905	1676	GSM3823939_control.s1.dgecounts.rds	13.1835	control1	control	0	3	3	Intercalated cells
CCTAAAGCAACTTGAC_1	SeuratProject	12196	1564	GSM3823939_control.s1.dgecounts.rds	3.09118	control1	control	5	5	5	Epithelial cells
CCTAAAGCACAACTGT_1	SeuratProject	17301	2031	GSM3823939_control.s1.dgecounts.rds	2.1097	control1	control	7	0	0	Distal tubular cells_1
CCTAAAGCACGTTGGC_1	SeuratProject	15299	1654	GSM3823939_control.s1.dgecounts.rds	1.66678	control1	control	5	5	5	Epithelial cells
CCTAAAGCATGCAACT_1	SeuratProject	9725	1286	GSM3823939_control.s1.dgecounts.rds	1.28535	control1	control	5	5	5	Epithelial cells
CCTAAAGGTAGGGACT_1	SeuratProject	24827	2290	GSM3823939_control.s1.dgecounts.rds	11.411	control1	control	4	4	4	Distal tubular cells_2
CCTAAAGGTCTAACGT_1	SeuratProject	15122	1652	GSM3823939_control.s1.dgecounts.rds	0.740643	control1	control	12	10	10	B cell
CCTAAAGTCAGGTAAA_1	SeuratProject	21263	2592	GSM3823939_control.s1.dgecounts.rds	0.456192	control1	control	8	6	6	neutrophil
CCTAAAGTCCCATTTA_1	SeuratProject	12805	1500	GSM3823939_control.s1.dgecounts.rds	14.5256	control1	control	7	0	0	Distal tubular cells_1
CCTAAAGTCCTAGAAC_1	SeuratProject	8586	1133	GSM3823939_control.s1.dgecounts.rds	1.53739	control1	control	0	3	3	Intercalated cells
CCTAAAGTCTACTTAC_1	SeuratProject	10903	1375	GSM3823939_control.s1.dgecounts.rds	1.50417	control1	control	0	3	3	Intercalated cells
CCTACACAGTCATGCT_1	SeuratProject	13521	1585	GSM3823939_control.s1.dgecounts.rds	1.20553	control1	control	0	3	3	Intercalated cells
CCTACACCACTTAAGC_1	SeuratProject	16578	2134	GSM3823939_control.s1.dgecounts.rds	0.814332	control1	control	7	0	0	Distal tubular cells_1
CCTACACCATAGGATA_1	SeuratProject	13581	1847	GSM3823939_control.s1.dgecounts.rds	1.61255	control1	control	0	3	3	Intercalated cells
CCTACACGTACCAGTT_1	SeuratProject	17506	2096	GSM3823939_control.s1.dgecounts.rds	1.06249	control1	control	7	0	0	Distal tubular cells_1
CCTACACGTAGAAGGA_1	SeuratProject	7514	1176	GSM3823939_control.s1.dgecounts.rds	6.65425	control1	control	3	1	1	Proximal tubular cells
CCTACACTCACCTCGT_1	SeuratProject	9005	1294	GSM3823939_control.s1.dgecounts.rds	1.1327	control1	control	7	0	0	Distal tubular cells_1
CCTACACTCGTTACGA_1	SeuratProject	18532	1934	GSM3823939_control.s1.dgecounts.rds	0.571984	control1	control	2	0	0	Distal tubular cells_1
CCTACCAAGTGGGCTA_1	SeuratProject	16664	1875	GSM3823939_control.s1.dgecounts.rds	1.00816	control1	control	0	3	3	Intercalated cells
CCTACCAAGTGTACTC_1	SeuratProject	20859	2350	GSM3823939_control.s1.dgecounts.rds	0.493792	control1	control	0	3	3	Intercalated cells
CCTACCACAAAGGCGT_1	SeuratProject	13572	1661	GSM3823939_control.s1.dgecounts.rds	1.07574	control1	control	9	8	8	kidney endothelial cells
CCTACCACACACATGT_1	SeuratProject	10990	1548	GSM3823939_control.s1.dgecounts.rds	1.45587	control1	control	3	1	1	Proximal tubular cells
CCTACCACACCAGGCT_1	SeuratProject	11714	1501	GSM3823939_control.s1.dgecounts.rds	1.42564	control1	control	7	0	0	Distal tubular cells_1
CCTACCACACGCATCG_1	SeuratProject	22126	2289	GSM3823939_control.s1.dgecounts.rds	0.872277	control1	control	10	9	9	podocytes
CCTACCACATCTGGTA_1	SeuratProject	16099	2095	GSM3823939_control.s1.dgecounts.rds	1.01249	control1	control	3	1	1	Proximal tubular cells
CCTACCAGTGGTCCGT_1	SeuratProject	23291	2677	GSM3823939_control.s1.dgecounts.rds	0.562449	control1	control	3	1	1	Proximal tubular cells
CCTACCAGTTACGTCA_1	SeuratProject	10722	1217	GSM3823939_control.s1.dgecounts.rds	1.20313	control1	control	5	5	5	Epithelial cells
CCTACCATCCTCGCAT_1	SeuratProject	26215	2708	GSM3823939_control.s1.dgecounts.rds	0.659928	control1	control	3	1	1	Proximal tubular cells
CCTAGCTAGACTAGGC_1	SeuratProject	45155	4050	GSM3823939_control.s1.dgecounts.rds	4.54878	control1	control	5	5	5	Epithelial cells
CCTAGCTAGTGTCCCG_1	SeuratProject	6528	900	GSM3823939_control.s1.dgecounts.rds	1.59314	control1	control	13	11	11	Fibroblasts_2
CCTAGCTGTACCGCTG_1	SeuratProject	12769	1655	GSM3823939_control.s1.dgecounts.rds	0.790978	control1	control	5	5	5	Epithelial cells
CCTAGCTGTATAGGGC_1	SeuratProject	15090	1940	GSM3823939_control.s1.dgecounts.rds	1.59046	control1	control	8	6	6	neutrophil
CCTAGCTGTCATATGC_1	SeuratProject	7690	1320	GSM3823939_control.s1.dgecounts.rds	3.90117	control1	control	8	6	6	neutrophil
CCTAGCTGTGTGCCTG_1	SeuratProject	18248	2228	GSM3823939_control.s1.dgecounts.rds	0.915169	control1	control	0	3	3	Intercalated cells
CCTATTACAATAGCAA_1	SeuratProject	12638	1384	GSM3823939_control.s1.dgecounts.rds	0.727963	control1	control	0	3	3	Intercalated cells
CCTATTACAGATGAGC_1	SeuratProject	7617	1085	GSM3823939_control.s1.dgecounts.rds	1.32598	control1	control	7	0	0	Distal tubular cells_1
CCTATTACAGGTGCCT_1	SeuratProject	9679	1032	GSM3823939_control.s1.dgecounts.rds	6.106	control1	control	7	0	0	Distal tubular cells_1
CCTATTACATCGGACC_1	SeuratProject	17292	2246	GSM3823939_control.s1.dgecounts.rds	0.815406	control1	control	3	1	1	Proximal tubular cells
CCTATTATCTGTGCAA_1	SeuratProject	7814	1224	GSM3823939_control.s1.dgecounts.rds	0.716662	control1	control	7	0	0	Distal tubular cells_1
CCTATTATCTTGTCAT_1	SeuratProject	6720	1027	GSM3823939_control.s1.dgecounts.rds	2.60417	control1	control	9	8	8	kidney endothelial cells
CCTCAGTAGAGCTGGT_1	SeuratProject	15483	1864	GSM3823939_control.s1.dgecounts.rds	3.42957	control1	control	5	5	5	Epithelial cells
CCTCAGTAGCGCCTCA_1	SeuratProject	13395	1771	GSM3823939_control.s1.dgecounts.rds	1.03024	control1	control	7	0	0	Distal tubular cells_1
CCTCAGTAGCTAACAA_1	SeuratProject	14480	1758	GSM3823939_control.s1.dgecounts.rds	2.68646	control1	control	10	9	9	podocytes
CCTCAGTAGTCATGCT_1	SeuratProject	33231	2985	GSM3823939_control.s1.dgecounts.rds	12.8765	control1	control	4	4	4	Distal tubular cells_2
CCTCAGTCAGTGAGTG_1	SeuratProject	17365	1748	GSM3823939_control.s1.dgecounts.rds	9.72646	control1	control	5	5	5	Epithelial cells
CCTCAGTGTTACTGAC_1	SeuratProject	7079	973	GSM3823939_control.s1.dgecounts.rds	2.57098	control1	control	5	5	5	Epithelial cells
CCTCAGTTCACAAACC_1	SeuratProject	15061	1762	GSM3823939_control.s1.dgecounts.rds	2.20437	control1	control	5	5	5	Epithelial cells
CCTCAGTTCACGCGGT_1	SeuratProject	13771	1598	GSM3823939_control.s1.dgecounts.rds	2.6505	control1	control	5	5	5	Epithelial cells
CCTCAGTTCGTTTGCC_1	SeuratProject	14673	1836	GSM3823939_control.s1.dgecounts.rds	1.19948	control1	control	7	0	0	Distal tubular cells_1
CCTCAGTTCTGCCAGG_1	SeuratProject	16406	2014	GSM3823939_control.s1.dgecounts.rds	3.12081	control1	control	0	3	3	Intercalated cells
CCTCTGAAGCTGTTCA_1	SeuratProject	8887	1368	GSM3823939_control.s1.dgecounts.rds	9.6433	control1	control	8	6	6	neutrophil
CCTCTGACAATGGAAT_1	SeuratProject	9270	1185	GSM3823939_control.s1.dgecounts.rds	3.74326	control1	control	5	5	5	Epithelial cells
CCTCTGACACGACGAA_1	SeuratProject	58425	4780	GSM3823939_control.s1.dgecounts.rds	1.51134	control1	control	7	0	0	Distal tubular cells_1
CCTCTGACAGTATGCT_1	SeuratProject	15533	1781	GSM3823939_control.s1.dgecounts.rds	4.7383	control1	control	5	5	5	Epithelial cells
CCTCTGACATCATCCC_1	SeuratProject	7282	908	GSM3823939_control.s1.dgecounts.rds	6.89371	control1	control	5	5	5	Epithelial cells
CCTCTGACATGCGCAC_1	SeuratProject	22142	2683	GSM3823939_control.s1.dgecounts.rds	2.37106	control1	control	8	6	6	neutrophil
CCTCTGAGTACCAGTT_1	SeuratProject	43614	3463	GSM3823939_control.s1.dgecounts.rds	31.5014	control1	control	7	0	0	Distal tubular cells_1
CCTCTGAGTACCGTTA_1	SeuratProject	21089	2127	GSM3823939_control.s1.dgecounts.rds	17.2649	control1	control	4	4	4	Distal tubular cells_2
CCTCTGAGTCATACTG_1	SeuratProject	8413	1318	GSM3823939_control.s1.dgecounts.rds	7.42898	control1	control	8	6	6	neutrophil
CCTCTGAGTCTCAACA_1	SeuratProject	46166	4010	GSM3823939_control.s1.dgecounts.rds	4.6701	control1	control	4	4	4	Distal tubular cells_2
CCTCTGAGTGAGCGAT_1	SeuratProject	42434	3579	GSM3823939_control.s1.dgecounts.rds	17.8112	control1	control	4	4	4	Distal tubular cells_2
CCTCTGATCTAACTTC_1	SeuratProject	8863	1024	GSM3823939_control.s1.dgecounts.rds	7.55952	control1	control	13	11	11	Fibroblasts_2
CCTCTGATCTGACCTC_1	SeuratProject	11233	1369	GSM3823939_control.s1.dgecounts.rds	4.32654	control1	control	5	5	5	Epithelial cells
CCTTACGAGAGCCCAA_1	SeuratProject	15223	1880	GSM3823939_control.s1.dgecounts.rds	0.72916	control1	control	10	9	9	podocytes
CCTTACGAGGCCCTCA_1	SeuratProject	16577	1785	GSM3823939_control.s1.dgecounts.rds	0.820414	control1	control	5	5	5	Epithelial cells
CCTTACGCACCGGAAA_1	SeuratProject	13893	1948	GSM3823939_control.s1.dgecounts.rds	1.20924	control1	control	7	0	0	Distal tubular cells_1
CCTTACGCAGGGTACA_1	SeuratProject	13940	1624	GSM3823939_control.s1.dgecounts.rds	10.165	control1	control	5	5	5	Epithelial cells
CCTTACGCATGGTCAT_1	SeuratProject	8203	1090	GSM3823939_control.s1.dgecounts.rds	4.44959	control1	control	13	11	11	Fibroblasts_2
CCTTACGCATTAGGCT_1	SeuratProject	23922	2914	GSM3823939_control.s1.dgecounts.rds	5.76039	control1	control	7	0	0	Distal tubular cells_1
CCTTACGCATTGGCGC_1	SeuratProject	19905	2354	GSM3823939_control.s1.dgecounts.rds	0.658126	control1	control	7	0	0	Distal tubular cells_1
CCTTACGGTAGGCTGA_1	SeuratProject	14225	1797	GSM3823939_control.s1.dgecounts.rds	1.20211	control1	control	7	0	0	Distal tubular cells_1
CCTTACGGTATGAAAC_1	SeuratProject	14067	1934	GSM3823939_control.s1.dgecounts.rds	1.1232	control1	control	7	0	0	Distal tubular cells_1
CCTTACGGTCAGGACA_1	SeuratProject	14166	1895	GSM3823939_control.s1.dgecounts.rds	0.5012	control1	control	7	0	0	Distal tubular cells_1
CCTTACGGTGTGCCTG_1	SeuratProject	13253	1897	GSM3823939_control.s1.dgecounts.rds	0.965819	control1	control	3	1	1	Proximal tubular cells
CCTTACGTCATGCTCC_1	SeuratProject	20575	2543	GSM3823939_control.s1.dgecounts.rds	0.588092	control1	control	7	0	0	Distal tubular cells_1
CCTTACGTCCTATTCA_1	SeuratProject	12427	1681	GSM3823939_control.s1.dgecounts.rds	2.60723	control1	control	5	5	5	Epithelial cells
CCTTACGTCGTGGTCG_1	SeuratProject	9982	1279	GSM3823939_control.s1.dgecounts.rds	0.701262	control1	control	12	10	10	B cell
CCTTACGTCTTCATGT_1	SeuratProject	18582	2057	GSM3823939_control.s1.dgecounts.rds	0.661931	control1	control	0	3	3	Intercalated cells
CCTTCCCAGAAACCGC_1	SeuratProject	5880	881	GSM3823939_control.s1.dgecounts.rds	2.43197	control1	control	7	0	0	Distal tubular cells_1
CCTTCCCAGCAATATG_1	SeuratProject	11283	1261	GSM3823939_control.s1.dgecounts.rds	1.06355	control1	control	13	11	11	Fibroblasts_2
CCTTCCCAGCTAACTC_1	SeuratProject	18491	2053	GSM3823939_control.s1.dgecounts.rds	8.99356	control1	control	4	4	4	Distal tubular cells_2
CCTTCCCAGGATGGAA_1	SeuratProject	10590	1360	GSM3823939_control.s1.dgecounts.rds	0.443815	control1	control	3	1	1	Proximal tubular cells
CCTTCCCTCCAGTATG_1	SeuratProject	20422	2537	GSM3823939_control.s1.dgecounts.rds	0.641465	control1	control	3	1	1	Proximal tubular cells
CCTTCCCTCCGAGCCA_1	SeuratProject	7563	1165	GSM3823939_control.s1.dgecounts.rds	1.25612	control1	control	6	1	1	Proximal tubular cells
CCTTCGACAATCACAC_1	SeuratProject	10497	1464	GSM3823939_control.s1.dgecounts.rds	1.20034	control1	control	11	7	7	Fibroblasts_1
CCTTCGAGTGGCTCCA_1	SeuratProject	14019	1680	GSM3823939_control.s1.dgecounts.rds	1.19837	control1	control	0	3	3	Intercalated cells
CCTTTCTAGTGGTAAT_1	SeuratProject	17847	2411	GSM3823939_control.s1.dgecounts.rds	1.98913	control1	control	3	1	1	Proximal tubular cells
CCTTTCTCAAAGTCAA_1	SeuratProject	11746	1454	GSM3823939_control.s1.dgecounts.rds	6.48731	control1	control	4	4	4	Distal tubular cells_2
CCTTTCTCAGTCAGAG_1	SeuratProject	15961	2046	GSM3823939_control.s1.dgecounts.rds	0.795689	control1	control	0	3	3	Intercalated cells
CCTTTCTTCACGAAGG_1	SeuratProject	18675	2298	GSM3823939_control.s1.dgecounts.rds	0.942436	control1	control	3	1	1	Proximal tubular cells
CCTTTCTTCAGCACAT_1	SeuratProject	12826	1718	GSM3823939_control.s1.dgecounts.rds	1.1617	control1	control	0	3	3	Intercalated cells
CCTTTCTTCCACGTGG_1	SeuratProject	8922	1230	GSM3823939_control.s1.dgecounts.rds	1.31137	control1	control	13	11	11	Fibroblasts_2
CCTTTCTTCGGAGCAA_1	SeuratProject	19712	2349	GSM3823939_control.s1.dgecounts.rds	12.6167	control1	control	11	7	7	Fibroblasts_1
CCTTTCTTCTCGTATT_1	SeuratProject	9989	1533	GSM3823939_control.s1.dgecounts.rds	2.28251	control1	control	7	0	0	Distal tubular cells_1
CGAACATAGTGTTTGC_1	SeuratProject	19717	1995	GSM3823939_control.s1.dgecounts.rds	0.994066	control1	control	5	5	5	Epithelial cells
CGAACATCAAACTGCT_1	SeuratProject	18319	2104	GSM3823939_control.s1.dgecounts.rds	1.47388	control1	control	0	3	3	Intercalated cells
CGAACATCAACAACCT_1	SeuratProject	11306	1383	GSM3823939_control.s1.dgecounts.rds	1.39749	control1	control	0	3	3	Intercalated cells
CGAACATCATTAGCCA_1	SeuratProject	19233	2224	GSM3823939_control.s1.dgecounts.rds	0.920293	control1	control	7	0	0	Distal tubular cells_1
CGAACATGTCCGTCAG_1	SeuratProject	12979	1706	GSM3823939_control.s1.dgecounts.rds	1.04014	control1	control	3	1	1	Proximal tubular cells
CGAACATGTCTAAAGA_1	SeuratProject	12934	1646	GSM3823939_control.s1.dgecounts.rds	0.618525	control1	control	3	1	1	Proximal tubular cells
CGAACATGTGGTAACG_1	SeuratProject	9634	1232	GSM3823939_control.s1.dgecounts.rds	1.99294	control1	control	5	5	5	Epithelial cells
CGAACATTCCTTGGTC_1	SeuratProject	9323	1330	GSM3823939_control.s1.dgecounts.rds	1.83417	control1	control	11	7	7	Fibroblasts_1
CGAATGTAGTGTACGG_1	SeuratProject	15994	1832	GSM3823939_control.s1.dgecounts.rds	8.63449	control1	control	5	5	5	Epithelial cells
CGAATGTCACGTGAGA_1	SeuratProject	10236	1365	GSM3823939_control.s1.dgecounts.rds	1.33841	control1	control	5	5	5	Epithelial cells
CGAATGTCATGCATGT_1	SeuratProject	15217	1639	GSM3823939_control.s1.dgecounts.rds	1.13689	control1	control	5	5	5	Epithelial cells
CGAATGTGTCAGAAGC_1	SeuratProject	14940	1944	GSM3823939_control.s1.dgecounts.rds	0.609103	control1	control	7	0	0	Distal tubular cells_1
CGAATGTGTGATGATA_1	SeuratProject	11692	1627	GSM3823939_control.s1.dgecounts.rds	1.02634	control1	control	7	0	0	Distal tubular cells_1
CGAATGTGTTCACCTC_1	SeuratProject	17238	2016	GSM3823939_control.s1.dgecounts.rds	0.748347	control1	control	0	3	3	Intercalated cells
CGAATGTTCAACCAAC_1	SeuratProject	16359	1602	GSM3823939_control.s1.dgecounts.rds	5.59936	control1	control	4	4	4	Distal tubular cells_2
CGAATGTTCATCGATG_1	SeuratProject	10462	1434	GSM3823939_control.s1.dgecounts.rds	9.71134	control1	control	7	0	0	Distal tubular cells_1
CGAATGTTCGCACTCT_1	SeuratProject	9341	1136	GSM3823939_control.s1.dgecounts.rds	1.3596	control1	control	0	3	3	Intercalated cells
CGAATGTTCGGCGCTA_1	SeuratProject	8103	1110	GSM3823939_control.s1.dgecounts.rds	2.04862	control1	control	9	8	8	kidney endothelial cells
CGACCTTAGCCACGTC_1	SeuratProject	16897	2171	GSM3823939_control.s1.dgecounts.rds	0.970586	control1	control	3	1	1	Proximal tubular cells
CGACCTTCAATCCAAC_1	SeuratProject	19552	2225	GSM3823939_control.s1.dgecounts.rds	1.59574	control1	control	0	3	3	Intercalated cells
CGACCTTGTACCGGCT_1	SeuratProject	7376	1084	GSM3823939_control.s1.dgecounts.rds	3.95879	control1	control	0	3	3	Intercalated cells
CGACCTTGTACTTAGC_1	SeuratProject	28171	3105	GSM3823939_control.s1.dgecounts.rds	0.827092	control1	control	3	1	1	Proximal tubular cells
CGACCTTGTGCAACGA_1	SeuratProject	7923	1306	GSM3823939_control.s1.dgecounts.rds	5.16219	control1	control	3	1	1	Proximal tubular cells
CGACCTTTCGATGAGG_1	SeuratProject	14373	1698	GSM3823939_control.s1.dgecounts.rds	1.60718	control1	control	5	5	5	Epithelial cells
CGACCTTTCTAGAGTC_1	SeuratProject	8037	1170	GSM3823939_control.s1.dgecounts.rds	4.30509	control1	control	3	1	1	Proximal tubular cells
CGACTTCAGAGCCCAA_1	SeuratProject	9454	1229	GSM3823939_control.s1.dgecounts.rds	1.29046	control1	control	5	5	5	Epithelial cells
CGACTTCAGTCGAGTG_1	SeuratProject	12210	1853	GSM3823939_control.s1.dgecounts.rds	1.19574	control1	control	3	1	1	Proximal tubular cells
CGACTTCGTTTAGGAA_1	SeuratProject	8910	1327	GSM3823939_control.s1.dgecounts.rds	2.57015	control1	control	7	0	0	Distal tubular cells_1
CGACTTCTCAGATAAG_1	SeuratProject	12049	1349	GSM3823939_control.s1.dgecounts.rds	0.89634	control1	control	12	10	10	B cell
CGACTTCTCATCATTC_1	SeuratProject	7671	1102	GSM3823939_control.s1.dgecounts.rds	5.17534	control1	control	3	1	1	Proximal tubular cells
CGAGAAGAGTCGATAA_1	SeuratProject	6729	1090	GSM3823939_control.s1.dgecounts.rds	1.78333	control1	control	0	3	3	Intercalated cells
CGAGAAGCAATCAGAA_1	SeuratProject	9734	1212	GSM3823939_control.s1.dgecounts.rds	1.96219	control1	control	9	8	8	kidney endothelial cells
CGAGAAGGTAGTGAAT_1	SeuratProject	22408	2359	GSM3823939_control.s1.dgecounts.rds	0.81221	control1	control	10	9	9	podocytes
CGAGAAGTCAACCATG_1	SeuratProject	9284	1411	GSM3823939_control.s1.dgecounts.rds	1.71262	control1	control	11	7	7	Fibroblasts_1
CGAGAAGTCACTGGGC_1	SeuratProject	21818	2475	GSM3823939_control.s1.dgecounts.rds	6.63214	control1	control	9	8	8	kidney endothelial cells
CGAGAAGTCGGAGGTA_1	SeuratProject	24476	2766	GSM3823939_control.s1.dgecounts.rds	2.81092	control1	control	10	9	9	podocytes
CGAGCACAGAGAGCTC_1	SeuratProject	24563	2700	GSM3823939_control.s1.dgecounts.rds	0.708383	control1	control	3	1	1	Proximal tubular cells
CGAGCACAGATGGCGT_1	SeuratProject	12792	1496	GSM3823939_control.s1.dgecounts.rds	0.852095	control1	control	8	6	6	neutrophil
CGAGCACAGGTCGGAT_1	SeuratProject	15074	1584	GSM3823939_control.s1.dgecounts.rds	0.504179	control1	control	0	3	3	Intercalated cells
CGAGCACCAAGACGTG_1	SeuratProject	64261	4772	GSM3823939_control.s1.dgecounts.rds	8.93699	control1	control	4	4	4	Distal tubular cells_2
CGAGCACCAATGACCT_1	SeuratProject	35902	3431	GSM3823939_control.s1.dgecounts.rds	7.67088	control1	control	4	4	4	Distal tubular cells_2
CGAGCACCACGTTGGC_1	SeuratProject	36789	3668	GSM3823939_control.s1.dgecounts.rds	0.549077	control1	control	5	5	5	Epithelial cells
CGAGCACCAGGGATTG_1	SeuratProject	15375	1803	GSM3823939_control.s1.dgecounts.rds	1.29431	control1	control	10	9	9	podocytes
CGAGCACGTAAACCTC_1	SeuratProject	15863	1923	GSM3823939_control.s1.dgecounts.rds	0.851037	control1	control	0	3	3	Intercalated cells
CGAGCACGTACGAAAT_1	SeuratProject	12070	1359	GSM3823939_control.s1.dgecounts.rds	0.87821	control1	control	0	3	3	Intercalated cells
CGAGCACGTTGAGTTC_1	SeuratProject	11618	1462	GSM3823939_control.s1.dgecounts.rds	1.1792	control1	control	5	5	5	Epithelial cells
CGAGCCAAGTAGTGCG_1	SeuratProject	15445	1705	GSM3823939_control.s1.dgecounts.rds	2.99126	control1	control	5	5	5	Epithelial cells
CGAGCCACAGACACTT_1	SeuratProject	15478	1905	GSM3823939_control.s1.dgecounts.rds	2.23543	control1	control	0	3	3	Intercalated cells
CGAGCCACAGCTGCTG_1	SeuratProject	7206	1171	GSM3823939_control.s1.dgecounts.rds	7.00805	control1	control	11	7	7	Fibroblasts_1
CGAGCCAGTAGGCATG_1	SeuratProject	8002	1269	GSM3823939_control.s1.dgecounts.rds	2.97426	control1	control	3	1	1	Proximal tubular cells
CGAGCCAGTCGTTGTA_1	SeuratProject	10365	1523	GSM3823939_control.s1.dgecounts.rds	4.06175	control1	control	3	1	1	Proximal tubular cells
CGAGCCATCAAGGCTT_1	SeuratProject	16516	1915	GSM3823939_control.s1.dgecounts.rds	6.15767	control1	control	4	4	4	Distal tubular cells_2
CGAGCCATCAGGCAAG_1	SeuratProject	6748	1091	GSM3823939_control.s1.dgecounts.rds	5.05335	control1	control	5	5	5	Epithelial cells
CGAGCCATCGACGGAA_1	SeuratProject	7049	973	GSM3823939_control.s1.dgecounts.rds	2.2982	control1	control	0	3	3	Intercalated cells
CGAGCCATCGCCTGTT_1	SeuratProject	22126	2536	GSM3823939_control.s1.dgecounts.rds	0.677935	control1	control	7	0	0	Distal tubular cells_1
CGAGCCATCTCCAACC_1	SeuratProject	27512	2742	GSM3823939_control.s1.dgecounts.rds	3.71474	control1	control	4	4	4	Distal tubular cells_2
CGATCGGCATTTGCTT_1	SeuratProject	15631	2023	GSM3823939_control.s1.dgecounts.rds	0.582176	control1	control	3	1	1	Proximal tubular cells
CGATCGGGTACGAAAT_1	SeuratProject	7687	1244	GSM3823939_control.s1.dgecounts.rds	1.43099	control1	control	7	0	0	Distal tubular cells_1
CGATGGCAGCCAACAG_1	SeuratProject	15644	1758	GSM3823939_control.s1.dgecounts.rds	1.13782	control1	control	7	0	0	Distal tubular cells_1
CGATGGCAGTCCATAC_1	SeuratProject	6553	955	GSM3823939_control.s1.dgecounts.rds	1.8007	control1	control	0	3	3	Intercalated cells
CGATGGCCAGATTGCT_1	SeuratProject	11101	1490	GSM3823939_control.s1.dgecounts.rds	0.891812	control1	control	7	0	0	Distal tubular cells_1
CGATGGCCATCACCCT_1	SeuratProject	16438	1838	GSM3823939_control.s1.dgecounts.rds	0.602263	control1	control	3	1	1	Proximal tubular cells
CGATGGCCATCTATGG_1	SeuratProject	6035	957	GSM3823939_control.s1.dgecounts.rds	2.13753	control1	control	9	8	8	kidney endothelial cells
CGATGGCGTAGCGCAA_1	SeuratProject	18987	2123	GSM3823939_control.s1.dgecounts.rds	1.17449	control1	control	7	0	0	Distal tubular cells_1
CGATGGCGTATATCCG_1	SeuratProject	20126	2336	GSM3823939_control.s1.dgecounts.rds	1.11299	control1	control	7	0	0	Distal tubular cells_1
CGATGGCGTCAGTGGA_1	SeuratProject	9794	1312	GSM3823939_control.s1.dgecounts.rds	1.82765	control1	control	5	5	5	Epithelial cells
CGATGGCGTGCTCTTC_1	SeuratProject	8305	1128	GSM3823939_control.s1.dgecounts.rds	2.02288	control1	control	0	3	3	Intercalated cells
CGATGTAAGATGTGTA_1	SeuratProject	12631	1562	GSM3823939_control.s1.dgecounts.rds	1.15589	control1	control	0	3	3	Intercalated cells
CGATGTAAGCTGAACG_1	SeuratProject	6962	1091	GSM3823939_control.s1.dgecounts.rds	1.85292	control1	control	7	0	0	Distal tubular cells_1
CGATGTACATTTCACT_1	SeuratProject	11401	1530	GSM3823939_control.s1.dgecounts.rds	2.98219	control1	control	7	0	0	Distal tubular cells_1
CGATGTAGTTAGATGA_1	SeuratProject	9651	1301	GSM3823939_control.s1.dgecounts.rds	2.26919	control1	control	0	3	3	Intercalated cells
CGATGTATCCAAGCCG_1	SeuratProject	17377	2198	GSM3823939_control.s1.dgecounts.rds	1.20849	control1	control	0	3	3	Intercalated cells
CGATGTATCCCATTTA_1	SeuratProject	9194	1337	GSM3823939_control.s1.dgecounts.rds	0.641723	control1	control	7	0	0	Distal tubular cells_1
CGATGTATCCTTTCGG_1	SeuratProject	10248	1296	GSM3823939_control.s1.dgecounts.rds	1.3466	control1	control	10	9	9	podocytes
CGATGTATCGTAGGAG_1	SeuratProject	14928	1683	GSM3823939_control.s1.dgecounts.rds	1.20579	control1	control	7	0	0	Distal tubular cells_1
CGATTGACACCCATGG_1	SeuratProject	12537	1656	GSM3823939_control.s1.dgecounts.rds	3.03103	control1	control	7	0	0	Distal tubular cells_1
CGATTGACACGAGGTA_1	SeuratProject	31014	3293	GSM3823939_control.s1.dgecounts.rds	0.390146	control1	control	3	1	1	Proximal tubular cells
CGATTGACACGGCCAT_1	SeuratProject	14843	1621	GSM3823939_control.s1.dgecounts.rds	1.00384	control1	control	7	0	0	Distal tubular cells_1
CGATTGACAGGGTATG_1	SeuratProject	16998	2289	GSM3823939_control.s1.dgecounts.rds	1.11778	control1	control	3	1	1	Proximal tubular cells
CGATTGACATGGTCAT_1	SeuratProject	13863	1798	GSM3823939_control.s1.dgecounts.rds	0.894467	control1	control	7	0	0	Distal tubular cells_1
CGATTGAGTGAGGGTT_1	SeuratProject	16138	2045	GSM3823939_control.s1.dgecounts.rds	0.514314	control1	control	0	3	3	Intercalated cells
CGATTGAGTGTCTGAT_1	SeuratProject	9989	1298	GSM3823939_control.s1.dgecounts.rds	1.59175	control1	control	5	5	5	Epithelial cells
CGATTGATCACAGTAC_1	SeuratProject	17724	2208	GSM3823939_control.s1.dgecounts.rds	0.468292	control1	control	7	0	0	Distal tubular cells_1
CGATTGATCCTTTCTC_1	SeuratProject	10807	1256	GSM3823939_control.s1.dgecounts.rds	1.67484	control1	control	12	10	10	B cell
CGCCAAGCACTGTGTA_1	SeuratProject	13642	1438	GSM3823939_control.s1.dgecounts.rds	6.40669	control1	control	5	5	5	Epithelial cells
CGCCAAGCAGAAGCAC_1	SeuratProject	13135	1900	GSM3823939_control.s1.dgecounts.rds	0.966882	control1	control	3	1	1	Proximal tubular cells
CGCCAAGCATACGCCG_1	SeuratProject	14304	1953	GSM3823939_control.s1.dgecounts.rds	0.803971	control1	control	3	1	1	Proximal tubular cells
CGCCAAGCATGGGACA_1	SeuratProject	7918	1263	GSM3823939_control.s1.dgecounts.rds	4.72342	control1	control	8	6	6	neutrophil
CGCCAAGGTCTCCACT_1	SeuratProject	24319	2626	GSM3823939_control.s1.dgecounts.rds	0.493441	control1	control	0	3	3	Intercalated cells
CGCCAAGGTGCCTGTG_1	SeuratProject	15214	1888	GSM3823939_control.s1.dgecounts.rds	1.74839	control1	control	7	0	0	Distal tubular cells_1
CGCCAAGGTGGTACAG_1	SeuratProject	14984	1793	GSM3823939_control.s1.dgecounts.rds	3.16337	control1	control	5	5	5	Epithelial cells
CGCCAAGGTGTGACGA_1	SeuratProject	12626	1444	GSM3823939_control.s1.dgecounts.rds	0.990021	control1	control	0	3	3	Intercalated cells
CGCCAAGGTTACCAGT_1	SeuratProject	15138	1887	GSM3823939_control.s1.dgecounts.rds	1.01731	control1	control	7	0	0	Distal tubular cells_1
CGCCAAGTCAACACTG_1	SeuratProject	17132	1914	GSM3823939_control.s1.dgecounts.rds	0.80551	control1	control	0	3	3	Intercalated cells
CGCCAAGTCTGTTTGT_1	SeuratProject	14069	2045	GSM3823939_control.s1.dgecounts.rds	0.689459	control1	control	3	1	1	Proximal tubular cells
CGCCAAGTCTTCTGGC_1	SeuratProject	29984	2854	GSM3823939_control.s1.dgecounts.rds	7.35392	control1	control	4	4	4	Distal tubular cells_2
CGCGGTAAGACCTAGG_1	SeuratProject	21646	919	GSM3823939_control.s1.dgecounts.rds	71.9625	control1	control	4	4	4	Distal tubular cells_2
CGCGGTAAGCTGTCTA_1	SeuratProject	34746	3198	GSM3823939_control.s1.dgecounts.rds	0.923847	control1	control	10	9	9	podocytes
CGCGGTACACATGACT_1	SeuratProject	14760	1925	GSM3823939_control.s1.dgecounts.rds	1.19241	control1	control	3	1	1	Proximal tubular cells
CGCGGTACAGTATCTG_1	SeuratProject	14544	1832	GSM3823939_control.s1.dgecounts.rds	0.893839	control1	control	7	0	0	Distal tubular cells_1
CGCGGTAGTTCACGGC_1	SeuratProject	12873	1739	GSM3823939_control.s1.dgecounts.rds	1.25068	control1	control	7	0	0	Distal tubular cells_1
CGCGGTATCAGCTTAG_1	SeuratProject	9309	1271	GSM3823939_control.s1.dgecounts.rds	1.6006	control1	control	11	7	7	Fibroblasts_1
CGCGGTATCGGACAAG_1	SeuratProject	14685	1755	GSM3823939_control.s1.dgecounts.rds	1.86585	control1	control	5	5	5	Epithelial cells
CGCGTTTCACGGATAG_1	SeuratProject	5920	953	GSM3823939_control.s1.dgecounts.rds	1.70608	control1	control	7	0	0	Distal tubular cells_1
CGCGTTTCATCGATGT_1	SeuratProject	9528	1465	GSM3823939_control.s1.dgecounts.rds	1.3539	control1	control	3	1	1	Proximal tubular cells
CGCGTTTCATTAGGCT_1	SeuratProject	15969	1972	GSM3823939_control.s1.dgecounts.rds	8.95485	control1	control	4	4	4	Distal tubular cells_2
CGCGTTTGTCGAAAGC_1	SeuratProject	13412	1789	GSM3823939_control.s1.dgecounts.rds	0.984193	control1	control	8	6	6	neutrophil
CGCGTTTGTCGCCATG_1	SeuratProject	10955	1539	GSM3823939_control.s1.dgecounts.rds	1.14103	control1	control	7	0	0	Distal tubular cells_1
CGCGTTTTCGTTGCCT_1	SeuratProject	13565	1900	GSM3823939_control.s1.dgecounts.rds	1.21637	control1	control	7	0	0	Distal tubular cells_1
CGCTATCAGTACGTAA_1	SeuratProject	9984	1392	GSM3823939_control.s1.dgecounts.rds	2.09335	control1	control	7	0	0	Distal tubular cells_1
CGCTATCAGTGGGATC_1	SeuratProject	13856	1631	GSM3823939_control.s1.dgecounts.rds	0.923788	control1	control	0	3	3	Intercalated cells
CGCTATCCAAGCGATG_1	SeuratProject	11650	1557	GSM3823939_control.s1.dgecounts.rds	1.1588	control1	control	0	3	3	Intercalated cells
CGCTATCTCCGCGGTA_1	SeuratProject	14037	1647	GSM3823939_control.s1.dgecounts.rds	2.7285	control1	control	5	5	5	Epithelial cells
CGCTGGAAGAATAGGG_1	SeuratProject	19422	2576	GSM3823939_control.s1.dgecounts.rds	1.2769	control1	control	7	0	0	Distal tubular cells_1
CGCTGGAAGCGTGTCC_1	SeuratProject	29284	2853	GSM3823939_control.s1.dgecounts.rds	6.59746	control1	control	10	9	9	podocytes
CGCTGGAAGTTGTCGT_1	SeuratProject	7114	1173	GSM3823939_control.s1.dgecounts.rds	0.983975	control1	control	3	1	1	Proximal tubular cells
CGCTGGACAGATCTGT_1	SeuratProject	14571	1873	GSM3823939_control.s1.dgecounts.rds	1.13925	control1	control	0	3	3	Intercalated cells
CGCTGGACAGCTGTAT_1	SeuratProject	114502	7464	GSM3823939_control.s1.dgecounts.rds	1.60696	control1	control	5	5	5	Epithelial cells
CGCTGGAGTCCGTGAC_1	SeuratProject	12876	1549	GSM3823939_control.s1.dgecounts.rds	1.895	control1	control	12	10	10	B cell
CGCTGGAGTCTTGATG_1	SeuratProject	8431	1341	GSM3823939_control.s1.dgecounts.rds	1.63682	control1	control	3	1	1	Proximal tubular cells
CGCTGGATCATGCATG_1	SeuratProject	10047	1286	GSM3823939_control.s1.dgecounts.rds	9.70439	control1	control	5	5	5	Epithelial cells
CGCTGGATCCCTCTTT_1	SeuratProject	20416	2192	GSM3823939_control.s1.dgecounts.rds	16.5361	control1	control	7	0	0	Distal tubular cells_1
CGCTGGATCGCGGATC_1	SeuratProject	12154	1512	GSM3823939_control.s1.dgecounts.rds	0.937963	control1	control	12	10	10	B cell
CGCTGGATCGGTTAAC_1	SeuratProject	13407	1960	GSM3823939_control.s1.dgecounts.rds	1.14865	control1	control	7	0	0	Distal tubular cells_1
CGCTTCAAGGGTGTTG_1	SeuratProject	14320	1842	GSM3823939_control.s1.dgecounts.rds	2.28352	control1	control	0	3	3	Intercalated cells
CGCTTCAAGTGACATA_1	SeuratProject	11118	1466	GSM3823939_control.s1.dgecounts.rds	1.20525	control1	control	5	5	5	Epithelial cells
CGCTTCAAGTGTACTC_1	SeuratProject	14688	1855	GSM3823939_control.s1.dgecounts.rds	1.18464	control1	control	8	6	6	neutrophil
CGCTTCACATGCCCGA_1	SeuratProject	17064	2072	GSM3823939_control.s1.dgecounts.rds	1.21308	control1	control	5	5	5	Epithelial cells
CGCTTCATCGCACTCT_1	SeuratProject	21411	1834	GSM3823939_control.s1.dgecounts.rds	0.672551	control1	control	7	0	0	Distal tubular cells_1
CGCTTCATCGCCAAAT_1	SeuratProject	13829	1646	GSM3823939_control.s1.dgecounts.rds	1.17145	control1	control	0	3	3	Intercalated cells
CGGACACAGTGGGATC_1	SeuratProject	37896	3605	GSM3823939_control.s1.dgecounts.rds	12.8668	control1	control	7	0	0	Distal tubular cells_1
CGGACACAGTTAAGTG_1	SeuratProject	11496	1293	GSM3823939_control.s1.dgecounts.rds	2.6444	control1	control	5	5	5	Epithelial cells
CGGACACAGTTCCACA_1	SeuratProject	11408	1536	GSM3823939_control.s1.dgecounts.rds	0.95547	control1	control	7	0	0	Distal tubular cells_1
CGGACACCACAGGTTT_1	SeuratProject	35013	3189	GSM3823939_control.s1.dgecounts.rds	8.73961	control1	control	4	4	4	Distal tubular cells_2
CGGACACCAGCGAACA_1	SeuratProject	9756	1385	GSM3823939_control.s1.dgecounts.rds	1.52727	control1	control	3	1	1	Proximal tubular cells
CGGACACGTAAACACA_1	SeuratProject	17119	1989	GSM3823939_control.s1.dgecounts.rds	5.21058	control1	control	7	0	0	Distal tubular cells_1
CGGACACGTTAGGGTG_1	SeuratProject	17383	1757	GSM3823939_control.s1.dgecounts.rds	0.897429	control1	control	5	5	5	Epithelial cells
CGGACGTAGTAGCCGA_1	SeuratProject	20715	1931	GSM3823939_control.s1.dgecounts.rds	5.17017	control1	control	4	4	4	Distal tubular cells_2
CGGACGTCAAAGCAAT_1	SeuratProject	10775	1451	GSM3823939_control.s1.dgecounts.rds	4.64037	control1	control	3	1	1	Proximal tubular cells
CGGACGTCATTTCACT_1	SeuratProject	11124	1285	GSM3823939_control.s1.dgecounts.rds	0.602301	control1	control	5	5	5	Epithelial cells
CGGACGTTCGCAGGCT_1	SeuratProject	17732	2084	GSM3823939_control.s1.dgecounts.rds	1.04331	control1	control	7	0	0	Distal tubular cells_1
CGGACGTTCGCGTAGC_1	SeuratProject	8120	1185	GSM3823939_control.s1.dgecounts.rds	1.97044	control1	control	7	0	0	Distal tubular cells_1
CGGACGTTCTTCGAGA_1	SeuratProject	6559	981	GSM3823939_control.s1.dgecounts.rds	1.40265	control1	control	7	0	0	Distal tubular cells_1
CGGACTGAGAGTAATC_1	SeuratProject	11406	1454	GSM3823939_control.s1.dgecounts.rds	1.65702	control1	control	8	6	6	neutrophil
CGGACTGCACGTAAGG_1	SeuratProject	24006	2515	GSM3823939_control.s1.dgecounts.rds	2.5452	control1	control	0	3	3	Intercalated cells
CGGACTGCACTATCTT_1	SeuratProject	29424	2730	GSM3823939_control.s1.dgecounts.rds	3.27964	control1	control	4	4	4	Distal tubular cells_2
CGGACTGCAGCTCGCA_1	SeuratProject	17498	1850	GSM3823939_control.s1.dgecounts.rds	9.32107	control1	control	4	4	4	Distal tubular cells_2
CGGACTGGTCGCATAT_1	SeuratProject	13638	1624	GSM3823939_control.s1.dgecounts.rds	1.9431	control1	control	10	9	9	podocytes
CGGACTGGTGTGACGA_1	SeuratProject	22290	2468	GSM3823939_control.s1.dgecounts.rds	1.21579	control1	control	5	5	5	Epithelial cells
CGGACTGGTTTGTTTC_1	SeuratProject	7244	986	GSM3823939_control.s1.dgecounts.rds	2.91276	control1	control	9	8	8	kidney endothelial cells
CGGACTGTCACAAACC_1	SeuratProject	16573	1887	GSM3823939_control.s1.dgecounts.rds	1.27316	control1	control	7	0	0	Distal tubular cells_1
CGGAGCTAGTAGCGGT_1	SeuratProject	15466	1617	GSM3823939_control.s1.dgecounts.rds	8.42493	control1	control	5	5	5	Epithelial cells
CGGAGCTAGTGCGATG_1	SeuratProject	21083	2374	GSM3823939_control.s1.dgecounts.rds	0.588152	control1	control	7	0	0	Distal tubular cells_1
CGGAGCTAGTGTGGCA_1	SeuratProject	12229	1597	GSM3823939_control.s1.dgecounts.rds	0.596942	control1	control	7	0	0	Distal tubular cells_1
CGGAGCTCATGGATGG_1	SeuratProject	10370	1319	GSM3823939_control.s1.dgecounts.rds	0.983607	control1	control	0	3	3	Intercalated cells
CGGAGCTGTCCAGTTA_1	SeuratProject	7483	962	GSM3823939_control.s1.dgecounts.rds	2.47227	control1	control	9	8	8	kidney endothelial cells
CGGAGCTGTGCACCAC_1	SeuratProject	12353	1604	GSM3823939_control.s1.dgecounts.rds	1.61904	control1	control	0	3	3	Intercalated cells
CGGAGCTTCAACGGCC_1	SeuratProject	8039	1016	GSM3823939_control.s1.dgecounts.rds	1.43053	control1	control	11	7	7	Fibroblasts_1
CGGAGCTTCGTGGGAA_1	SeuratProject	7907	1001	GSM3823939_control.s1.dgecounts.rds	13.5955	control1	control	12	10	10	B cell
CGGAGTCAGCTAAACA_1	SeuratProject	6621	886	GSM3823939_control.s1.dgecounts.rds	2.00876	control1	control	9	8	8	kidney endothelial cells
CGGAGTCCAAGAAGAG_1	SeuratProject	17335	1825	GSM3823939_control.s1.dgecounts.rds	1.66715	control1	control	10	9	9	podocytes
CGGAGTCCAGAAGCAC_1	SeuratProject	16081	1928	GSM3823939_control.s1.dgecounts.rds	0.827063	control1	control	7	0	0	Distal tubular cells_1
CGGAGTCCATTTCAGG_1	SeuratProject	8492	1027	GSM3823939_control.s1.dgecounts.rds	0.824305	control1	control	0	3	3	Intercalated cells
CGGAGTCGTAATCACC_1	SeuratProject	29545	2393	GSM3823939_control.s1.dgecounts.rds	11.2134	control1	control	4	4	4	Distal tubular cells_2
CGGAGTCGTAGAGGAA_1	SeuratProject	24005	2807	GSM3823939_control.s1.dgecounts.rds	0.524891	control1	control	7	0	0	Distal tubular cells_1
CGGCTAGAGAAGGGTA_1	SeuratProject	7903	1286	GSM3823939_control.s1.dgecounts.rds	2.99886	control1	control	3	1	1	Proximal tubular cells
CGGCTAGAGACCCACC_1	SeuratProject	18916	2289	GSM3823939_control.s1.dgecounts.rds	1.1366	control1	control	3	1	1	Proximal tubular cells
CGGCTAGAGGACACCA_1	SeuratProject	12399	1687	GSM3823939_control.s1.dgecounts.rds	2.27438	control1	control	8	6	6	neutrophil
CGGCTAGAGGGTTTCT_1	SeuratProject	17019	2024	GSM3823939_control.s1.dgecounts.rds	1.14578	control1	control	5	5	5	Epithelial cells
CGGCTAGAGTATCGAA_1	SeuratProject	11139	1384	GSM3823939_control.s1.dgecounts.rds	2.15459	control1	control	5	5	5	Epithelial cells
CGGCTAGAGTGAAGAG_1	SeuratProject	14739	1844	GSM3823939_control.s1.dgecounts.rds	1.43158	control1	control	4	4	4	Distal tubular cells_2
CGGCTAGCAATTCCTT_1	SeuratProject	15094	1763	GSM3823939_control.s1.dgecounts.rds	1.24553	control1	control	0	3	3	Intercalated cells
CGGCTAGCACGACGAA_1	SeuratProject	10205	1480	GSM3823939_control.s1.dgecounts.rds	1.35228	control1	control	3	1	1	Proximal tubular cells
CGGCTAGTCACTTATC_1	SeuratProject	10582	1380	GSM3823939_control.s1.dgecounts.rds	2.93895	control1	control	1	2	2	Collecting duct cells
CGGCTAGTCCGCATAA_1	SeuratProject	9681	1565	GSM3823939_control.s1.dgecounts.rds	3.03688	control1	control	3	1	1	Proximal tubular cells
CGGCTAGTCCTGCAGG_1	SeuratProject	15675	1966	GSM3823939_control.s1.dgecounts.rds	1.16746	control1	control	7	0	0	Distal tubular cells_1
CGGCTAGTCTACGAGT_1	SeuratProject	8280	1147	GSM3823939_control.s1.dgecounts.rds	2.59662	control1	control	9	8	8	kidney endothelial cells
CGGCTAGTCTCCAACC_1	SeuratProject	23604	2565	GSM3823939_control.s1.dgecounts.rds	0.961701	control1	control	0	3	3	Intercalated cells
CGGGTCAAGAAGGCCT_1	SeuratProject	20341	2449	GSM3823939_control.s1.dgecounts.rds	0.845583	control1	control	3	1	1	Proximal tubular cells
CGGGTCAAGCCACTAT_1	SeuratProject	8908	1164	GSM3823939_control.s1.dgecounts.rds	2.43601	control1	control	7	0	0	Distal tubular cells_1
CGGGTCAAGTACGATA_1	SeuratProject	18961	1820	GSM3823939_control.s1.dgecounts.rds	0.738358	control1	control	12	10	10	B cell
CGGGTCACACATTCGA_1	SeuratProject	17723	1721	GSM3823939_control.s1.dgecounts.rds	11.2848	control1	control	4	4	4	Distal tubular cells_2
CGGGTCACACGAAACG_1	SeuratProject	7414	1050	GSM3823939_control.s1.dgecounts.rds	5.32776	control1	control	9	8	8	kidney endothelial cells
CGGGTCAGTCGAGATG_1	SeuratProject	18364	2084	GSM3823939_control.s1.dgecounts.rds	5.55979	control1	control	4	4	4	Distal tubular cells_2
CGGGTCATCCTCCTAG_1	SeuratProject	13799	1589	GSM3823939_control.s1.dgecounts.rds	14.8417	control1	control	4	4	4	Distal tubular cells_2
CGGGTCATCCTTGACC_1	SeuratProject	9852	1292	GSM3823939_control.s1.dgecounts.rds	2.55786	control1	control	10	9	9	podocytes
CGGTTAAAGTAGATGT_1	SeuratProject	8480	1064	GSM3823939_control.s1.dgecounts.rds	3.77358	control1	control	13	11	11	Fibroblasts_2
CGGTTAAAGTCCATAC_1	SeuratProject	12061	1546	GSM3823939_control.s1.dgecounts.rds	1.7909	control1	control	7	0	0	Distal tubular cells_1
CGGTTAACACGCCAGT_1	SeuratProject	25654	2560	GSM3823939_control.s1.dgecounts.rds	0.83028	control1	control	0	3	3	Intercalated cells
CGGTTAACAGAAGCAC_1	SeuratProject	18719	1792	GSM3823939_control.s1.dgecounts.rds	6.31444	control1	control	4	4	4	Distal tubular cells_2
CGGTTAAGTTACCGAT_1	SeuratProject	6319	960	GSM3823939_control.s1.dgecounts.rds	0.917867	control1	control	11	7	7	Fibroblasts_1
CGGTTAATCCAGTATG_1	SeuratProject	11870	1519	GSM3823939_control.s1.dgecounts.rds	0.994103	control1	control	7	0	0	Distal tubular cells_1
CGGTTAATCCGAAGAG_1	SeuratProject	72575	5101	GSM3823939_control.s1.dgecounts.rds	6.44299	control1	control	4	4	4	Distal tubular cells_2
CGGTTAATCCGTAGGC_1	SeuratProject	18495	2283	GSM3823939_control.s1.dgecounts.rds	0.686672	control1	control	3	1	1	Proximal tubular cells
CGGTTAATCGCACTCT_1	SeuratProject	12809	1650	GSM3823939_control.s1.dgecounts.rds	1.75658	control1	control	11	7	7	Fibroblasts_1
CGGTTAATCGGTCCGA_1	SeuratProject	11466	1388	GSM3823939_control.s1.dgecounts.rds	0.793651	control1	control	12	10	10	B cell
CGGTTAATCTCGTTTA_1	SeuratProject	16132	1974	GSM3823939_control.s1.dgecounts.rds	0.960823	control1	control	7	0	0	Distal tubular cells_1
CGTAGCGAGAAGCCCA_1	SeuratProject	10477	1332	GSM3823939_control.s1.dgecounts.rds	1.38398	control1	control	3	1	1	Proximal tubular cells
CGTAGCGAGAAGGTGA_1	SeuratProject	5163	897	GSM3823939_control.s1.dgecounts.rds	3.77687	control1	control	5	5	5	Epithelial cells
CGTAGCGAGGCTCAGA_1	SeuratProject	11541	1732	GSM3823939_control.s1.dgecounts.rds	2.46946	control1	control	9	8	8	kidney endothelial cells
CGTAGCGCACAGACTT_1	SeuratProject	17674	2139	GSM3823939_control.s1.dgecounts.rds	1.32398	control1	control	4	4	4	Distal tubular cells_2
CGTAGCGCAGAGTGTG_1	SeuratProject	15365	1722	GSM3823939_control.s1.dgecounts.rds	1.30817	control1	control	7	0	0	Distal tubular cells_1
CGTAGCGCAGCCTGTG_1	SeuratProject	12630	1474	GSM3823939_control.s1.dgecounts.rds	7.37926	control1	control	5	5	5	Epithelial cells
CGTAGCGGTTACCAGT_1	SeuratProject	22440	2306	GSM3823939_control.s1.dgecounts.rds	0.984848	control1	control	10	9	9	podocytes
CGTAGCGTCACAACGT_1	SeuratProject	15037	1946	GSM3823939_control.s1.dgecounts.rds	1.36995	control1	control	7	0	0	Distal tubular cells_1
CGTAGCGTCACTATTC_1	SeuratProject	15399	1627	GSM3823939_control.s1.dgecounts.rds	0.857199	control1	control	12	10	10	B cell
CGTAGGCAGAAGGTTT_1	SeuratProject	7119	1196	GSM3823939_control.s1.dgecounts.rds	5.25355	control1	control	6	1	1	Proximal tubular cells
CGTAGGCAGGGAGTAA_1	SeuratProject	11007	1481	GSM3823939_control.s1.dgecounts.rds	1.708	control1	control	0	3	3	Intercalated cells
CGTAGGCAGTTAGCGG_1	SeuratProject	6547	1175	GSM3823939_control.s1.dgecounts.rds	3.2534	control1	control	3	1	1	Proximal tubular cells
CGTAGGCAGTTATCGC_1	SeuratProject	23030	3029	GSM3823939_control.s1.dgecounts.rds	0.916196	control1	control	0	3	3	Intercalated cells
CGTAGGCCAATCAGAA_1	SeuratProject	10783	1443	GSM3823939_control.s1.dgecounts.rds	2.55031	control1	control	0	3	3	Intercalated cells
CGTAGGCCAATCTGCA_1	SeuratProject	13872	1979	GSM3823939_control.s1.dgecounts.rds	1.2327	control1	control	7	0	0	Distal tubular cells_1
CGTAGGCCACCATCCT_1	SeuratProject	18813	2342	GSM3823939_control.s1.dgecounts.rds	10.2376	control1	control	7	0	0	Distal tubular cells_1
CGTAGGCTCGAGGTAG_1	SeuratProject	17684	2168	GSM3823939_control.s1.dgecounts.rds	7.83194	control1	control	0	3	3	Intercalated cells
CGTCACTAGTCACGCC_1	SeuratProject	11485	1482	GSM3823939_control.s1.dgecounts.rds	1.8633	control1	control	10	9	9	podocytes
CGTCACTAGTTTCCTT_1	SeuratProject	8633	1352	GSM3823939_control.s1.dgecounts.rds	1.84177	control1	control	3	1	1	Proximal tubular cells
CGTCACTCAAGAGTCG_1	SeuratProject	10213	1368	GSM3823939_control.s1.dgecounts.rds	1.4883	control1	control	7	0	0	Distal tubular cells_1
CGTCACTCACCCAGTG_1	SeuratProject	12851	1538	GSM3823939_control.s1.dgecounts.rds	0.840402	control1	control	0	3	3	Intercalated cells
CGTCACTCATTTGCCC_1	SeuratProject	7444	1199	GSM3823939_control.s1.dgecounts.rds	1.34336	control1	control	3	1	1	Proximal tubular cells
CGTCACTGTTAAAGTG_1	SeuratProject	8326	1336	GSM3823939_control.s1.dgecounts.rds	0.924814	control1	control	2	0	0	Distal tubular cells_1
CGTCACTTCAGGCCCA_1	SeuratProject	8432	1180	GSM3823939_control.s1.dgecounts.rds	6.75996	control1	control	11	7	7	Fibroblasts_1
CGTCACTTCCTACAGA_1	SeuratProject	11263	1567	GSM3823939_control.s1.dgecounts.rds	1.43834	control1	control	8	6	6	neutrophil
CGTCAGGAGCTAACAA_1	SeuratProject	28966	3436	GSM3823939_control.s1.dgecounts.rds	1.47069	control1	control	11	7	7	Fibroblasts_1
CGTCAGGAGGCGACAT_1	SeuratProject	20260	2066	GSM3823939_control.s1.dgecounts.rds	1.26851	control1	control	10	9	9	podocytes
CGTCAGGAGGGAAACA_1	SeuratProject	14972	1845	GSM3823939_control.s1.dgecounts.rds	3.70692	control1	control	7	0	0	Distal tubular cells_1
CGTCAGGGTAGTACCT_1	SeuratProject	15749	1942	GSM3823939_control.s1.dgecounts.rds	0.882596	control1	control	0	3	3	Intercalated cells
CGTCAGGGTCCGTTAA_1	SeuratProject	33211	3314	GSM3823939_control.s1.dgecounts.rds	0.704586	control1	control	5	5	5	Epithelial cells
CGTCAGGTCATCTGTT_1	SeuratProject	6470	1057	GSM3823939_control.s1.dgecounts.rds	2.02473	control1	control	9	8	8	kidney endothelial cells
CGTCAGGTCGCGTTTC_1	SeuratProject	8537	1180	GSM3823939_control.s1.dgecounts.rds	1.66335	control1	control	11	7	7	Fibroblasts_1
CGTCCATAGTGTCTCA_1	SeuratProject	8449	1179	GSM3823939_control.s1.dgecounts.rds	1.84637	control1	control	7	0	0	Distal tubular cells_1
CGTCCATCACGGTTTA_1	SeuratProject	22437	2761	GSM3823939_control.s1.dgecounts.rds	1.17217	control1	control	3	1	1	Proximal tubular cells
CGTCCATGTAAACACA_1	SeuratProject	15926	1738	GSM3823939_control.s1.dgecounts.rds	1.72046	control1	control	7	0	0	Distal tubular cells_1
CGTCCATGTACGCTGC_1	SeuratProject	12373	1435	GSM3823939_control.s1.dgecounts.rds	2.14176	control1	control	5	5	5	Epithelial cells
CGTCCATGTATATGGA_1	SeuratProject	7227	1185	GSM3823939_control.s1.dgecounts.rds	1.77114	control1	control	11	7	7	Fibroblasts_1
CGTCCATTCCTACAGA_1	SeuratProject	12828	1530	GSM3823939_control.s1.dgecounts.rds	1.82413	control1	control	0	3	3	Intercalated cells
CGTCTACAGGCCATAG_1	SeuratProject	14575	1822	GSM3823939_control.s1.dgecounts.rds	1.96913	control1	control	0	3	3	Intercalated cells
CGTCTACAGGTCATCT_1	SeuratProject	16943	1738	GSM3823939_control.s1.dgecounts.rds	20.9585	control1	control	0	3	3	Intercalated cells
CGTCTACAGTCATCCA_1	SeuratProject	29257	3284	GSM3823939_control.s1.dgecounts.rds	0.54346	control1	control	8	6	6	neutrophil
CGTCTACAGTTGCAGG_1	SeuratProject	9552	1467	GSM3823939_control.s1.dgecounts.rds	2.50209	control1	control	7	0	0	Distal tubular cells_1
CGTCTACCAATCTACG_1	SeuratProject	17814	2113	GSM3823939_control.s1.dgecounts.rds	1.26305	control1	control	7	0	0	Distal tubular cells_1
CGTCTACCACATCCGG_1	SeuratProject	10819	1434	GSM3823939_control.s1.dgecounts.rds	1.47888	control1	control	0	3	3	Intercalated cells
CGTCTACGTAGGACAC_1	SeuratProject	14076	1744	GSM3823939_control.s1.dgecounts.rds	3.13299	control1	control	7	0	0	Distal tubular cells_1
CGTCTACGTATGAATG_1	SeuratProject	55373	4574	GSM3823939_control.s1.dgecounts.rds	17.9654	control1	control	7	0	0	Distal tubular cells_1
CGTCTACGTTCCACAA_1	SeuratProject	7922	1297	GSM3823939_control.s1.dgecounts.rds	1.86822	control1	control	8	6	6	neutrophil
CGTCTACTCCTGCCAT_1	SeuratProject	11436	1369	GSM3823939_control.s1.dgecounts.rds	15.6173	control1	control	4	4	4	Distal tubular cells_2
CGTCTACTCGTGGACC_1	SeuratProject	25249	2683	GSM3823939_control.s1.dgecounts.rds	4.59028	control1	control	4	4	4	Distal tubular cells_2
CGTCTACTCTTGAGGT_1	SeuratProject	14550	1693	GSM3823939_control.s1.dgecounts.rds	3.87629	control1	control	5	5	5	Epithelial cells
CGTGAGCAGACTTGAA_1	SeuratProject	12951	1709	GSM3823939_control.s1.dgecounts.rds	0.609992	control1	control	7	0	0	Distal tubular cells_1
CGTGAGCCAAACAACA_1	SeuratProject	5600	922	GSM3823939_control.s1.dgecounts.rds	1.80357	control1	control	11	7	7	Fibroblasts_1
CGTGAGCCAACTTGAC_1	SeuratProject	15780	2006	GSM3823939_control.s1.dgecounts.rds	0.716096	control1	control	5	5	5	Epithelial cells
CGTGAGCGTCTGATCA_1	SeuratProject	13054	2234	GSM3823939_control.s1.dgecounts.rds	0.375364	control1	control	3	1	1	Proximal tubular cells
CGTGAGCTCGCCATAA_1	SeuratProject	6931	1043	GSM3823939_control.s1.dgecounts.rds	1.71692	control1	control	11	7	7	Fibroblasts_1
CGTGTAACAAGGTTCT_1	SeuratProject	8899	1453	GSM3823939_control.s1.dgecounts.rds	1.06754	control1	control	12	10	10	B cell
CGTGTAACAGATCTGT_1	SeuratProject	10080	1728	GSM3823939_control.s1.dgecounts.rds	0.535714	control1	control	12	10	10	B cell
CGTGTAATCCTTGGTC_1	SeuratProject	7950	1376	GSM3823939_control.s1.dgecounts.rds	0.45283	control1	control	0	3	3	Intercalated cells
CGTGTAATCGCAGGCT_1	SeuratProject	7464	1434	GSM3823939_control.s1.dgecounts.rds	3.71115	control1	control	8	6	6	neutrophil
CGTGTAATCGTTGACA_1	SeuratProject	6597	1369	GSM3823939_control.s1.dgecounts.rds	1.01561	control1	control	2	0	0	Distal tubular cells_1
CGTGTAATCTCACATT_1	SeuratProject	9734	1753	GSM3823939_control.s1.dgecounts.rds	0.749949	control1	control	7	0	0	Distal tubular cells_1
CGTGTCTAGAATGTTG_1	SeuratProject	24694	2939	GSM3823939_control.s1.dgecounts.rds	0.854459	control1	control	3	1	1	Proximal tubular cells
CGTGTCTAGATCTGAA_1	SeuratProject	27323	3522	GSM3823939_control.s1.dgecounts.rds	2.09713	control1	control	6	1	1	Proximal tubular cells
CGTGTCTAGCAATCTC_1	SeuratProject	12275	1794	GSM3823939_control.s1.dgecounts.rds	1.28717	control1	control	7	0	0	Distal tubular cells_1
CGTGTCTAGCGTTGCC_1	SeuratProject	6305	1058	GSM3823939_control.s1.dgecounts.rds	2.01427	control1	control	9	8	8	kidney endothelial cells
CGTGTCTAGGAGCGAG_1	SeuratProject	24619	2624	GSM3823939_control.s1.dgecounts.rds	15.1509	control1	control	7	0	0	Distal tubular cells_1
CGTGTCTAGTGTTAGA_1	SeuratProject	22455	3196	GSM3823939_control.s1.dgecounts.rds	1.04654	control1	control	3	1	1	Proximal tubular cells
CGTGTCTAGTGTTTGC_1	SeuratProject	11261	1679	GSM3823939_control.s1.dgecounts.rds	3.52544	control1	control	0	3	3	Intercalated cells
CGTGTCTCAACCGCCA_1	SeuratProject	13117	1490	GSM3823939_control.s1.dgecounts.rds	11.1535	control1	control	4	4	4	Distal tubular cells_2
CGTGTCTCACACTGCG_1	SeuratProject	10996	1529	GSM3823939_control.s1.dgecounts.rds	1.255	control1	control	8	6	6	neutrophil
CGTGTCTCACTATCTT_1	SeuratProject	10080	1389	GSM3823939_control.s1.dgecounts.rds	4.09722	control1	control	12	10	10	B cell
CGTGTCTCAGACGCTC_1	SeuratProject	12862	1363	GSM3823939_control.s1.dgecounts.rds	2.13808	control1	control	7	0	0	Distal tubular cells_1
CGTGTCTCAGCGTAAG_1	SeuratProject	10849	1502	GSM3823939_control.s1.dgecounts.rds	1.18905	control1	control	4	4	4	Distal tubular cells_2
CGTGTCTCATGTTCCC_1	SeuratProject	6686	992	GSM3823939_control.s1.dgecounts.rds	1.60036	control1	control	1	2	2	Collecting duct cells
CGTGTCTCATTCCTCG_1	SeuratProject	8037	1182	GSM3823939_control.s1.dgecounts.rds	6.34565	control1	control	7	0	0	Distal tubular cells_1
CGTGTCTGTAGCTAAA_1	SeuratProject	7075	1239	GSM3823939_control.s1.dgecounts.rds	2.72792	control1	control	7	0	0	Distal tubular cells_1
CGTGTCTGTCCGAAGA_1	SeuratProject	17364	2349	GSM3823939_control.s1.dgecounts.rds	0.725639	control1	control	7	0	0	Distal tubular cells_1
CGTGTCTTCTAACTCT_1	SeuratProject	31706	3749	GSM3823939_control.s1.dgecounts.rds	0.829496	control1	control	3	1	1	Proximal tubular cells
CGTGTCTTCTTCGGTC_1	SeuratProject	16572	2179	GSM3823939_control.s1.dgecounts.rds	0.699976	control1	control	7	0	0	Distal tubular cells_1
CGTTAGAAGACGCTTT_1	SeuratProject	8410	1241	GSM3823939_control.s1.dgecounts.rds	1.33175	control1	control	2	0	0	Distal tubular cells_1
CGTTAGAAGGCCCTTG_1	SeuratProject	20995	2481	GSM3823939_control.s1.dgecounts.rds	0.709693	control1	control	3	1	1	Proximal tubular cells
CGTTAGAAGTCGTTTG_1	SeuratProject	8234	1317	GSM3823939_control.s1.dgecounts.rds	1.71241	control1	control	3	1	1	Proximal tubular cells
CGTTAGAAGTTTGCGT_1	SeuratProject	38663	3769	GSM3823939_control.s1.dgecounts.rds	7.86799	control1	control	0	3	3	Intercalated cells
CGTTAGACAATCGAAA_1	SeuratProject	16082	1985	GSM3823939_control.s1.dgecounts.rds	0.938938	control1	control	0	3	3	Intercalated cells
CGTTAGACAGATGGGT_1	SeuratProject	12084	1587	GSM3823939_control.s1.dgecounts.rds	1.0096	control1	control	7	0	0	Distal tubular cells_1
CGTTAGACATACGCTA_1	SeuratProject	10866	1501	GSM3823939_control.s1.dgecounts.rds	1.00313	control1	control	0	3	3	Intercalated cells
CGTTAGACATGAACCT_1	SeuratProject	11777	1594	GSM3823939_control.s1.dgecounts.rds	1.1463	control1	control	3	1	1	Proximal tubular cells
CGTTAGAGTAAGAGGA_1	SeuratProject	6590	997	GSM3823939_control.s1.dgecounts.rds	1.79059	control1	control	9	8	8	kidney endothelial cells
CGTTAGAGTCTAGAGG_1	SeuratProject	12130	1575	GSM3823939_control.s1.dgecounts.rds	1.43446	control1	control	0	3	3	Intercalated cells
CGTTAGAGTTCAGCGC_1	SeuratProject	10924	1462	GSM3823939_control.s1.dgecounts.rds	0.805566	control1	control	12	10	10	B cell
CGTTAGATCATTCACT_1	SeuratProject	12413	1423	GSM3823939_control.s1.dgecounts.rds	2.89213	control1	control	5	5	5	Epithelial cells
CGTTAGATCCTTTCGG_1	SeuratProject	11171	1610	GSM3823939_control.s1.dgecounts.rds	1.07421	control1	control	11	7	7	Fibroblasts_1
CGTTCTGCAAAGTCAA_1	SeuratProject	13237	1419	GSM3823939_control.s1.dgecounts.rds	1.55624	control1	control	4	4	4	Distal tubular cells_2
CGTTCTGCAATGGACG_1	SeuratProject	9256	845	GSM3823939_control.s1.dgecounts.rds	2.31201	control1	control	9	8	8	kidney endothelial cells
CGTTCTGCATACAGCT_1	SeuratProject	12170	934	GSM3823939_control.s1.dgecounts.rds	3.87839	control1	control	9	8	8	kidney endothelial cells
CGTTCTGCATGGAATA_1	SeuratProject	42394	3852	GSM3823939_control.s1.dgecounts.rds	4.17748	control1	control	7	0	0	Distal tubular cells_1
CGTTCTGGTTCAGTAC_1	SeuratProject	12629	1306	GSM3823939_control.s1.dgecounts.rds	1.06897	control1	control	0	3	3	Intercalated cells
CGTTCTGGTTGCCTCT_1	SeuratProject	10247	1155	GSM3823939_control.s1.dgecounts.rds	1.02469	control1	control	0	3	3	Intercalated cells
CGTTCTGTCAACGCTA_1	SeuratProject	19362	1936	GSM3823939_control.s1.dgecounts.rds	1.23954	control1	control	0	3	3	Intercalated cells
CGTTGGGAGCCGCCTA_1	SeuratProject	29864	2216	GSM3823939_control.s1.dgecounts.rds	34.4964	control1	control	7	0	0	Distal tubular cells_1
CGTTGGGAGGTAGCCA_1	SeuratProject	20141	2286	GSM3823939_control.s1.dgecounts.rds	3.07333	control1	control	0	3	3	Intercalated cells
CGTTGGGAGGTGCTAG_1	SeuratProject	20001	2125	GSM3823939_control.s1.dgecounts.rds	5.16474	control1	control	7	0	0	Distal tubular cells_1
CGTTGGGCACCGCTAG_1	SeuratProject	12236	1373	GSM3823939_control.s1.dgecounts.rds	4.98529	control1	control	0	3	3	Intercalated cells
CGTTGGGCATGATCCA_1	SeuratProject	16324	1829	GSM3823939_control.s1.dgecounts.rds	3.3754	control1	control	3	1	1	Proximal tubular cells
CGTTGGGCATTAGCCA_1	SeuratProject	21021	2361	GSM3823939_control.s1.dgecounts.rds	9.98525	control1	control	8	6	6	neutrophil
CGTTGGGGTTATGCGT_1	SeuratProject	18069	2117	GSM3823939_control.s1.dgecounts.rds	2.95534	control1	control	11	7	7	Fibroblasts_1
CTAACTTAGCGTTGCC_1	SeuratProject	17168	1999	GSM3823939_control.s1.dgecounts.rds	1.19991	control1	control	13	11	11	Fibroblasts_2
CTAACTTCATTGTGCA_1	SeuratProject	15758	1828	GSM3823939_control.s1.dgecounts.rds	1.01536	control1	control	12	10	10	B cell
CTAACTTGTAGTACCT_1	SeuratProject	16762	2106	GSM3823939_control.s1.dgecounts.rds	0.978404	control1	control	0	3	3	Intercalated cells
CTAACTTTCATTTGGG_1	SeuratProject	16010	2093	GSM3823939_control.s1.dgecounts.rds	0.986883	control1	control	7	0	0	Distal tubular cells_1
CTAAGACAGAGAACAG_1	SeuratProject	35158	3291	GSM3823939_control.s1.dgecounts.rds	1.79476	control1	control	5	5	5	Epithelial cells
CTAAGACAGTAGGCCA_1	SeuratProject	18231	2222	GSM3823939_control.s1.dgecounts.rds	6.22566	control1	control	7	0	0	Distal tubular cells_1
CTAAGACAGTGCCAGA_1	SeuratProject	7477	1097	GSM3823939_control.s1.dgecounts.rds	1.35081	control1	control	11	7	7	Fibroblasts_1
CTAAGACCAAGCTGGA_1	SeuratProject	7554	1319	GSM3823939_control.s1.dgecounts.rds	1.09876	control1	control	3	1	1	Proximal tubular cells
CTAAGACCAAGTTAAG_1	SeuratProject	14380	1792	GSM3823939_control.s1.dgecounts.rds	7.42698	control1	control	7	0	0	Distal tubular cells_1
CTAAGACCACCATCCT_1	SeuratProject	8638	1338	GSM3823939_control.s1.dgecounts.rds	1.50498	control1	control	3	1	1	Proximal tubular cells
CTAAGACCAGGTCTCG_1	SeuratProject	14816	1804	GSM3823939_control.s1.dgecounts.rds	0.701944	control1	control	0	3	3	Intercalated cells
CTAAGACGTATTCGTG_1	SeuratProject	10618	1380	GSM3823939_control.s1.dgecounts.rds	0.941797	control1	control	8	6	6	neutrophil
CTAAGACGTTATCGGT_1	SeuratProject	16442	1974	GSM3823939_control.s1.dgecounts.rds	0.468313	control1	control	8	6	6	neutrophil
CTAAGACTCCTCTAGC_1	SeuratProject	8400	1235	GSM3823939_control.s1.dgecounts.rds	2.4881	control1	control	9	8	8	kidney endothelial cells
CTAAGACTCCTTAATC_1	SeuratProject	12301	1529	GSM3823939_control.s1.dgecounts.rds	1.04057	control1	control	7	0	0	Distal tubular cells_1
CTAATGGAGACTAAGT_1	SeuratProject	11587	1694	GSM3823939_control.s1.dgecounts.rds	1.21688	control1	control	3	1	1	Proximal tubular cells
CTAATGGCAGGGATTG_1	SeuratProject	19229	2031	GSM3823939_control.s1.dgecounts.rds	0.681263	control1	control	12	10	10	B cell
CTAATGGGTAATCGTC_1	SeuratProject	14756	2100	GSM3823939_control.s1.dgecounts.rds	0.996205	control1	control	3	1	1	Proximal tubular cells
CTAATGGGTAGAAGGA_1	SeuratProject	12010	1446	GSM3823939_control.s1.dgecounts.rds	2.14821	control1	control	10	9	9	podocytes
CTAATGGGTCTACCTC_1	SeuratProject	18558	2239	GSM3823939_control.s1.dgecounts.rds	2.00991	control1	control	0	3	3	Intercalated cells
CTAATGGTCAGTACGT_1	SeuratProject	27001	3003	GSM3823939_control.s1.dgecounts.rds	0.36295	control1	control	3	1	1	Proximal tubular cells
CTAATGGTCCAGGGCT_1	SeuratProject	8064	1236	GSM3823939_control.s1.dgecounts.rds	1.90972	control1	control	0	3	3	Intercalated cells
CTAATGGTCTCGAGTA_1	SeuratProject	15192	1915	GSM3823939_control.s1.dgecounts.rds	0.862296	control1	control	4	4	4	Distal tubular cells_2
CTACACCAGCCCTAAT_1	SeuratProject	9862	1192	GSM3823939_control.s1.dgecounts.rds	1.45001	control1	control	0	3	3	Intercalated cells
CTACACCAGCTCCTCT_1	SeuratProject	9037	1363	GSM3823939_control.s1.dgecounts.rds	1.16189	control1	control	7	0	0	Distal tubular cells_1
CTACACCAGTGAAGTT_1	SeuratProject	11925	1452	GSM3823939_control.s1.dgecounts.rds	1.18239	control1	control	11	7	7	Fibroblasts_1
CTACACCGTTTCGCTC_1	SeuratProject	8032	1042	GSM3823939_control.s1.dgecounts.rds	18.2395	control1	control	9	8	8	kidney endothelial cells
CTACACCTCGTACGGC_1	SeuratProject	19263	2580	GSM3823939_control.s1.dgecounts.rds	0.892903	control1	control	6	1	1	Proximal tubular cells
CTACATTCAACGATGG_1	SeuratProject	8769	1399	GSM3823939_control.s1.dgecounts.rds	1.83601	control1	control	8	6	6	neutrophil
CTACATTCATGGTCTA_1	SeuratProject	14327	1652	GSM3823939_control.s1.dgecounts.rds	21.2675	control1	control	4	4	4	Distal tubular cells_2
CTACATTCATTGCGGC_1	SeuratProject	12289	1529	GSM3823939_control.s1.dgecounts.rds	1.23688	control1	control	12	10	10	B cell
CTACATTGTACACCGC_1	SeuratProject	14635	1805	GSM3823939_control.s1.dgecounts.rds	0.874616	control1	control	5	5	5	Epithelial cells
CTACATTGTTACCGAT_1	SeuratProject	11322	1414	GSM3823939_control.s1.dgecounts.rds	1.21887	control1	control	5	5	5	Epithelial cells
CTACATTTCGATAGAA_1	SeuratProject	9105	1027	GSM3823939_control.s1.dgecounts.rds	1.04338	control1	control	13	11	11	Fibroblasts_2
CTACCCAAGACCCACC_1	SeuratProject	26159	2994	GSM3823939_control.s1.dgecounts.rds	0.653695	control1	control	6	1	1	Proximal tubular cells
CTACCCAAGCCGATTT_1	SeuratProject	19575	2324	GSM3823939_control.s1.dgecounts.rds	1.48659	control1	control	5	5	5	Epithelial cells
CTACCCACAACACCCG_1	SeuratProject	35085	3169	GSM3823939_control.s1.dgecounts.rds	1.64458	control1	control	5	5	5	Epithelial cells
CTACCCACAAGTAATG_1	SeuratProject	36963	2710	GSM3823939_control.s1.dgecounts.rds	26.2046	control1	control	0	3	3	Intercalated cells
CTACCCACACAGGAGT_1	SeuratProject	32577	3118	GSM3823939_control.s1.dgecounts.rds	4.10105	control1	control	4	4	4	Distal tubular cells_2
CTACCCAGTGTGACGA_1	SeuratProject	10263	1402	GSM3823939_control.s1.dgecounts.rds	0.935399	control1	control	7	0	0	Distal tubular cells_1
CTACCCAGTTGGTAAA_1	SeuratProject	18647	2017	GSM3823939_control.s1.dgecounts.rds	0.359307	control1	control	0	3	3	Intercalated cells
CTACCCATCACCGTAA_1	SeuratProject	13815	1731	GSM3823939_control.s1.dgecounts.rds	1.54904	control1	control	7	0	0	Distal tubular cells_1
CTACCCATCCGCAGTG_1	SeuratProject	7750	996	GSM3823939_control.s1.dgecounts.rds	1.31613	control1	control	0	3	3	Intercalated cells
CTACGTCAGACAAGCC_1	SeuratProject	11699	1594	GSM3823939_control.s1.dgecounts.rds	9.01786	control1	control	3	1	1	Proximal tubular cells
CTACGTCAGACTAAGT_1	SeuratProject	26492	3056	GSM3823939_control.s1.dgecounts.rds	3.68413	control1	control	12	10	10	B cell
CTACGTCAGGACCACA_1	SeuratProject	6754	795	GSM3823939_control.s1.dgecounts.rds	5.04886	control1	control	13	11	11	Fibroblasts_2
CTACGTCCAAAGGAAG_1	SeuratProject	19776	2517	GSM3823939_control.s1.dgecounts.rds	0.611853	control1	control	8	6	6	neutrophil
CTACGTCCAGGGTACA_1	SeuratProject	21957	2261	GSM3823939_control.s1.dgecounts.rds	1.89461	control1	control	8	6	6	neutrophil
CTACGTCGTGCACCAC_1	SeuratProject	11992	1804	GSM3823939_control.s1.dgecounts.rds	4.19446	control1	control	3	1	1	Proximal tubular cells
CTACGTCGTGCGCTTG_1	SeuratProject	8273	1180	GSM3823939_control.s1.dgecounts.rds	2.44168	control1	control	4	4	4	Distal tubular cells_2
CTACGTCGTTCAACCA_1	SeuratProject	9866	1296	GSM3823939_control.s1.dgecounts.rds	1.30752	control1	control	11	7	7	Fibroblasts_1
CTACGTCTCATCGCTC_1	SeuratProject	16961	2093	GSM3823939_control.s1.dgecounts.rds	14.1855	control1	control	3	1	1	Proximal tubular cells
CTACGTCTCCTAGTGA_1	SeuratProject	18276	2329	GSM3823939_control.s1.dgecounts.rds	1.82753	control1	control	7	0	0	Distal tubular cells_1
CTAGAGTAGGCGATAC_1	SeuratProject	10336	1574	GSM3823939_control.s1.dgecounts.rds	1.33514	control1	control	3	1	1	Proximal tubular cells
CTAGAGTCAAAGAATC_1	SeuratProject	43568	3807	GSM3823939_control.s1.dgecounts.rds	6.66315	control1	control	7	0	0	Distal tubular cells_1
CTAGAGTCACACCGCA_1	SeuratProject	12760	1604	GSM3823939_control.s1.dgecounts.rds	0.815047	control1	control	11	7	7	Fibroblasts_1
CTAGAGTGTAAACACA_1	SeuratProject	9054	1248	GSM3823939_control.s1.dgecounts.rds	3.93196	control1	control	0	3	3	Intercalated cells
CTAGAGTGTACACCGC_1	SeuratProject	13917	1686	GSM3823939_control.s1.dgecounts.rds	0.783215	control1	control	7	0	0	Distal tubular cells_1
CTAGAGTGTCGGGTCT_1	SeuratProject	10284	1463	GSM3823939_control.s1.dgecounts.rds	1.97394	control1	control	5	5	5	Epithelial cells
CTAGAGTGTGAGTATA_1	SeuratProject	15221	2176	GSM3823939_control.s1.dgecounts.rds	0.768675	control1	control	3	1	1	Proximal tubular cells
CTAGAGTTCTCGAGTA_1	SeuratProject	23453	2370	GSM3823939_control.s1.dgecounts.rds	9.26108	control1	control	4	4	4	Distal tubular cells_2
CTAGCCTAGACCACGA_1	SeuratProject	28996	2823	GSM3823939_control.s1.dgecounts.rds	0.813905	control1	control	7	0	0	Distal tubular cells_1
CTAGCCTAGTGTGAAT_1	SeuratProject	9131	1255	GSM3823939_control.s1.dgecounts.rds	3.43883	control1	control	11	7	7	Fibroblasts_1
CTAGCCTGTAGCTTGT_1	SeuratProject	13001	1501	GSM3823939_control.s1.dgecounts.rds	2.2306	control1	control	5	5	5	Epithelial cells
CTAGCCTGTCGGGTCT_1	SeuratProject	12049	1589	GSM3823939_control.s1.dgecounts.rds	1.27811	control1	control	0	3	3	Intercalated cells
CTAGCCTTCACCGGGT_1	SeuratProject	48522	4398	GSM3823939_control.s1.dgecounts.rds	7.27917	control1	control	4	4	4	Distal tubular cells_2
CTAGCCTTCACTTACT_1	SeuratProject	22679	2747	GSM3823939_control.s1.dgecounts.rds	0.939195	control1	control	3	1	1	Proximal tubular cells
CTAGCCTTCCATGAGT_1	SeuratProject	16483	1921	GSM3823939_control.s1.dgecounts.rds	1.81399	control1	control	7	0	0	Distal tubular cells_1
CTAGCCTTCTTGAGAC_1	SeuratProject	12878	1431	GSM3823939_control.s1.dgecounts.rds	1.70834	control1	control	5	5	5	Epithelial cells
CTAGTGAAGACAGGCT_1	SeuratProject	12877	1762	GSM3823939_control.s1.dgecounts.rds	0.574668	control1	control	0	3	3	Intercalated cells
CTAGTGAAGATGTGGC_1	SeuratProject	13286	1755	GSM3823939_control.s1.dgecounts.rds	1.4075	control1	control	8	6	6	neutrophil
CTAGTGAAGCGTAATA_1	SeuratProject	7449	1127	GSM3823939_control.s1.dgecounts.rds	3.35616	control1	control	9	8	8	kidney endothelial cells
CTAGTGAAGGTCGGAT_1	SeuratProject	10150	1268	GSM3823939_control.s1.dgecounts.rds	0.660099	control1	control	7	0	0	Distal tubular cells_1
CTAGTGAAGTTTAGGA_1	SeuratProject	7531	1192	GSM3823939_control.s1.dgecounts.rds	0.916213	control1	control	7	0	0	Distal tubular cells_1
CTAGTGACAAGAGGCT_1	SeuratProject	11160	1479	GSM3823939_control.s1.dgecounts.rds	0.591398	control1	control	0	3	3	Intercalated cells
CTAGTGACACTGTTAG_1	SeuratProject	17151	2004	GSM3823939_control.s1.dgecounts.rds	1.49845	control1	control	7	0	0	Distal tubular cells_1
CTAGTGAGTGACCAAG_1	SeuratProject	14843	1627	GSM3823939_control.s1.dgecounts.rds	7.76123	control1	control	12	10	10	B cell
CTAGTGATCCTTTCTC_1	SeuratProject	18704	1967	GSM3823939_control.s1.dgecounts.rds	9.32956	control1	control	0	3	3	Intercalated cells
CTAGTGATCGCGCCAA_1	SeuratProject	15659	2210	GSM3823939_control.s1.dgecounts.rds	1.05371	control1	control	7	0	0	Distal tubular cells_1
CTCACACAGTGCTGCC_1	SeuratProject	8666	1178	GSM3823939_control.s1.dgecounts.rds	2.64251	control1	control	9	8	8	kidney endothelial cells
CTCACACCAATCGAAA_1	SeuratProject	14015	1700	GSM3823939_control.s1.dgecounts.rds	0.563682	control1	control	0	3	3	Intercalated cells
CTCACACCAGTTCCCT_1	SeuratProject	19909	2153	GSM3823939_control.s1.dgecounts.rds	7.12241	control1	control	4	4	4	Distal tubular cells_2
CTCACACGTAAACGCG_1	SeuratProject	19165	2086	GSM3823939_control.s1.dgecounts.rds	7.04931	control1	control	4	4	4	Distal tubular cells_2
CTCACACGTACCAGTT_1	SeuratProject	6863	960	GSM3823939_control.s1.dgecounts.rds	2.27306	control1	control	0	3	3	Intercalated cells
CTCACACGTAGTACCT_1	SeuratProject	6641	1001	GSM3823939_control.s1.dgecounts.rds	3.55368	control1	control	9	8	8	kidney endothelial cells
CTCACACGTCTTGTCC_1	SeuratProject	9929	1270	GSM3823939_control.s1.dgecounts.rds	0.906436	control1	control	4	4	4	Distal tubular cells_2
CTCACACTCACTTACT_1	SeuratProject	13469	2032	GSM3823939_control.s1.dgecounts.rds	1.87839	control1	control	11	7	7	Fibroblasts_1
CTCAGAACACATTAGC_1	SeuratProject	10177	1440	GSM3823939_control.s1.dgecounts.rds	1.92591	control1	control	7	0	0	Distal tubular cells_1
CTCAGAACATATGCTG_1	SeuratProject	13408	1867	GSM3823939_control.s1.dgecounts.rds	1.61844	control1	control	7	0	0	Distal tubular cells_1
CTCAGAAGTTCCAACA_1	SeuratProject	15221	2135	GSM3823939_control.s1.dgecounts.rds	1.19572	control1	control	3	1	1	Proximal tubular cells
CTCAGAATCGCCCTTA_1	SeuratProject	30974	3539	GSM3823939_control.s1.dgecounts.rds	0.655388	control1	control	3	1	1	Proximal tubular cells
CTCATTAAGCTTTGGT_1	SeuratProject	9260	1226	GSM3823939_control.s1.dgecounts.rds	0.313175	control1	control	12	10	10	B cell
CTCATTAGTCGCTTCT_1	SeuratProject	9321	1300	GSM3823939_control.s1.dgecounts.rds	1.45907	control1	control	13	11	11	Fibroblasts_2
CTCCTAGCACCAGCAC_1	SeuratProject	19344	2091	GSM3823939_control.s1.dgecounts.rds	7.82155	control1	control	4	4	4	Distal tubular cells_2
CTCCTAGCAGGCAGTA_1	SeuratProject	11090	1493	GSM3823939_control.s1.dgecounts.rds	2.39856	control1	control	11	7	7	Fibroblasts_1
CTCCTAGCAGTTAACC_1	SeuratProject	19594	2290	GSM3823939_control.s1.dgecounts.rds	0.597122	control1	control	9	8	8	kidney endothelial cells
CTCCTAGGTAAGGATT_1	SeuratProject	8271	1055	GSM3823939_control.s1.dgecounts.rds	1.28159	control1	control	5	5	5	Epithelial cells
CTCCTAGGTAGCGATG_1	SeuratProject	37464	3783	GSM3823939_control.s1.dgecounts.rds	0.854153	control1	control	7	0	0	Distal tubular cells_1
CTCCTAGGTCAGAGGT_1	SeuratProject	18669	2276	GSM3823939_control.s1.dgecounts.rds	1.10879	control1	control	7	0	0	Distal tubular cells_1
CTCCTAGGTCATGCAT_1	SeuratProject	8103	943	GSM3823939_control.s1.dgecounts.rds	1.41923	control1	control	13	11	11	Fibroblasts_2
CTCCTAGGTCTTGCGG_1	SeuratProject	17336	2000	GSM3823939_control.s1.dgecounts.rds	0.519151	control1	control	11	7	7	Fibroblasts_1
CTCCTAGGTTATCGGT_1	SeuratProject	7662	1253	GSM3823939_control.s1.dgecounts.rds	3.45863	control1	control	11	7	7	Fibroblasts_1
CTCCTAGTCCGTAGTA_1	SeuratProject	16797	2025	GSM3823939_control.s1.dgecounts.rds	0.964458	control1	control	3	1	1	Proximal tubular cells
CTCGAAAAGATGAGAG_1	SeuratProject	15467	1699	GSM3823939_control.s1.dgecounts.rds	3.07752	control1	control	12	10	10	B cell
CTCGAAACACCTATCC_1	SeuratProject	65475	4846	GSM3823939_control.s1.dgecounts.rds	22.0221	control1	control	4	4	4	Distal tubular cells_2
CTCGAAACAGACAGGT_1	SeuratProject	18180	2430	GSM3823939_control.s1.dgecounts.rds	2.18372	control1	control	0	3	3	Intercalated cells
CTCGAAACATTGGGCC_1	SeuratProject	12173	1755	GSM3823939_control.s1.dgecounts.rds	1.26509	control1	control	5	5	5	Epithelial cells
CTCGAAATCCCATTTA_1	SeuratProject	6322	954	GSM3823939_control.s1.dgecounts.rds	2.35685	control1	control	12	10	10	B cell
CTCGAAATCGAATGGG_1	SeuratProject	16107	1784	GSM3823939_control.s1.dgecounts.rds	2.54548	control1	control	5	5	5	Epithelial cells
CTCGAAATCTTACCTA_1	SeuratProject	33535	3274	GSM3823939_control.s1.dgecounts.rds	6.89727	control1	control	4	4	4	Distal tubular cells_2
CTCGAGGAGCTGCCCA_1	SeuratProject	8949	1087	GSM3823939_control.s1.dgecounts.rds	1.24036	control1	control	5	5	5	Epithelial cells
CTCGAGGCAATAGAGT_1	SeuratProject	9205	1319	GSM3823939_control.s1.dgecounts.rds	2.5421	control1	control	11	7	7	Fibroblasts_1
CTCGAGGCAGCTGTGC_1	SeuratProject	8326	1203	GSM3823939_control.s1.dgecounts.rds	0.888782	control1	control	11	7	7	Fibroblasts_1
CTCGAGGGTATATCCG_1	SeuratProject	27783	3152	GSM3823939_control.s1.dgecounts.rds	0.806248	control1	control	9	8	8	kidney endothelial cells
CTCGAGGGTCCGAACC_1	SeuratProject	33185	3439	GSM3823939_control.s1.dgecounts.rds	1.56999	control1	control	8	6	6	neutrophil
CTCGAGGGTGGCGAAT_1	SeuratProject	30523	3226	GSM3823939_control.s1.dgecounts.rds	0.720768	control1	control	7	0	0	Distal tubular cells_1
CTCGAGGTCCTTGACC_1	SeuratProject	8289	1297	GSM3823939_control.s1.dgecounts.rds	2.06298	control1	control	7	0	0	Distal tubular cells_1
CTCGAGGTCGAGCCCA_1	SeuratProject	18902	2240	GSM3823939_control.s1.dgecounts.rds	0.740662	control1	control	7	0	0	Distal tubular cells_1
CTCGAGGTCTTGAGGT_1	SeuratProject	9635	1413	GSM3823939_control.s1.dgecounts.rds	2.57395	control1	control	3	1	1	Proximal tubular cells
CTCGGAGAGACAAGCC_1	SeuratProject	14508	1592	GSM3823939_control.s1.dgecounts.rds	21.0436	control1	control	7	0	0	Distal tubular cells_1
CTCGGAGAGGCAAAGA_1	SeuratProject	14643	1946	GSM3823939_control.s1.dgecounts.rds	0.491703	control1	control	0	3	3	Intercalated cells
CTCGGAGCACCATCCT_1	SeuratProject	33087	3234	GSM3823939_control.s1.dgecounts.rds	5.8724	control1	control	4	4	4	Distal tubular cells_2
CTCGGAGGTATGAATG_1	SeuratProject	16496	2168	GSM3823939_control.s1.dgecounts.rds	1.60645	control1	control	0	3	3	Intercalated cells
CTCGGAGTCCGGGTGT_1	SeuratProject	11925	1495	GSM3823939_control.s1.dgecounts.rds	0.922432	control1	control	5	5	5	Epithelial cells
CTCGGAGTCCGTCAAA_1	SeuratProject	7483	1185	GSM3823939_control.s1.dgecounts.rds	1.29627	control1	control	11	7	7	Fibroblasts_1
CTCGGGAAGAGGACGG_1	SeuratProject	27530	2830	GSM3823939_control.s1.dgecounts.rds	0.494007	control1	control	10	9	9	podocytes
CTCGGGAAGCCACGCT_1	SeuratProject	41545	3814	GSM3823939_control.s1.dgecounts.rds	9.01432	control1	control	0	3	3	Intercalated cells
CTCGGGAGTAAATGAC_1	SeuratProject	12043	1759	GSM3823939_control.s1.dgecounts.rds	0.954912	control1	control	8	6	6	neutrophil
CTCGGGAGTGGGTATG_1	SeuratProject	10529	1553	GSM3823939_control.s1.dgecounts.rds	0.854782	control1	control	3	1	1	Proximal tubular cells
CTCGGGAGTTATCCGA_1	SeuratProject	7647	1100	GSM3823939_control.s1.dgecounts.rds	1.72617	control1	control	0	3	3	Intercalated cells
CTCGGGATCTCGGACG_1	SeuratProject	50966	4426	GSM3823939_control.s1.dgecounts.rds	13.4717	control1	control	7	0	0	Distal tubular cells_1
CTCGGGATCTGAGTGT_1	SeuratProject	15051	2089	GSM3823939_control.s1.dgecounts.rds	0.89695	control1	control	3	1	1	Proximal tubular cells
CTCGTACAGCTTCGCG_1	SeuratProject	10397	1548	GSM3823939_control.s1.dgecounts.rds	1.06762	control1	control	7	0	0	Distal tubular cells_1
CTCGTACCAAACGCGA_1	SeuratProject	10645	1493	GSM3823939_control.s1.dgecounts.rds	1.13668	control1	control	9	8	8	kidney endothelial cells
CTCGTACCAGCTGTGC_1	SeuratProject	9190	1426	GSM3823939_control.s1.dgecounts.rds	1.66485	control1	control	8	6	6	neutrophil
CTCGTACGTGCAGGTA_1	SeuratProject	12099	1496	GSM3823939_control.s1.dgecounts.rds	1.08273	control1	control	7	0	0	Distal tubular cells_1
CTCGTCAAGAAAGTGG_1	SeuratProject	13540	1795	GSM3823939_control.s1.dgecounts.rds	1.15214	control1	control	7	0	0	Distal tubular cells_1
CTCGTCAAGAAGGTTT_1	SeuratProject	10777	1380	GSM3823939_control.s1.dgecounts.rds	0.965018	control1	control	0	3	3	Intercalated cells
CTCGTCAAGGAGTCTG_1	SeuratProject	16939	1992	GSM3823939_control.s1.dgecounts.rds	0.572643	control1	control	0	3	3	Intercalated cells
CTCGTCAAGGCGTACA_1	SeuratProject	16895	2026	GSM3823939_control.s1.dgecounts.rds	0.680675	control1	control	0	3	3	Intercalated cells
CTCGTCAAGGCTCAGA_1	SeuratProject	19804	1651	GSM3823939_control.s1.dgecounts.rds	0.994749	control1	control	5	5	5	Epithelial cells
CTCGTCAAGGGCACTA_1	SeuratProject	8526	1362	GSM3823939_control.s1.dgecounts.rds	1.11424	control1	control	7	0	0	Distal tubular cells_1
CTCGTCACAAGCTGGA_1	SeuratProject	26682	2771	GSM3823939_control.s1.dgecounts.rds	2.42486	control1	control	5	5	5	Epithelial cells
CTCGTCACACAGCGTC_1	SeuratProject	11957	1781	GSM3823939_control.s1.dgecounts.rds	1.0036	control1	control	0	3	3	Intercalated cells
CTCGTCACAGATCTGT_1	SeuratProject	25814	2860	GSM3823939_control.s1.dgecounts.rds	16.34	control1	control	3	1	1	Proximal tubular cells
CTCGTCACAGGGATTG_1	SeuratProject	16952	1865	GSM3823939_control.s1.dgecounts.rds	1.54554	control1	control	7	0	0	Distal tubular cells_1
CTCGTCACAGGTCTCG_1	SeuratProject	10149	1636	GSM3823939_control.s1.dgecounts.rds	3.7245	control1	control	3	1	1	Proximal tubular cells
CTCGTCACATCTCGCT_1	SeuratProject	6338	826	GSM3823939_control.s1.dgecounts.rds	1.73556	control1	control	11	7	7	Fibroblasts_1
CTCGTCAGTCCGAGTC_1	SeuratProject	14225	1850	GSM3823939_control.s1.dgecounts.rds	0.920914	control1	control	7	0	0	Distal tubular cells_1
CTCGTCAGTCGGCATC_1	SeuratProject	16477	2285	GSM3823939_control.s1.dgecounts.rds	1.15919	control1	control	7	0	0	Distal tubular cells_1
CTCGTCAGTGTGGCTC_1	SeuratProject	15889	2021	GSM3823939_control.s1.dgecounts.rds	1.0888	control1	control	7	0	0	Distal tubular cells_1
CTCGTCAGTTACTGAC_1	SeuratProject	22820	2545	GSM3823939_control.s1.dgecounts.rds	4.9518	control1	control	4	4	4	Distal tubular cells_2
CTCTAATAGTCCAGGA_1	SeuratProject	23252	2815	GSM3823939_control.s1.dgecounts.rds	0.804232	control1	control	3	1	1	Proximal tubular cells
CTCTAATAGTGCGATG_1	SeuratProject	12138	1625	GSM3823939_control.s1.dgecounts.rds	0.280112	control1	control	3	1	1	Proximal tubular cells
CTCTAATCAACGATCT_1	SeuratProject	16420	2187	GSM3823939_control.s1.dgecounts.rds	1.46772	control1	control	7	0	0	Distal tubular cells_1
CTCTAATGTACGCTGC_1	SeuratProject	11702	1651	GSM3823939_control.s1.dgecounts.rds	3.23022	control1	control	5	5	5	Epithelial cells
CTCTAATTCCAGTAGT_1	SeuratProject	14321	1944	GSM3823939_control.s1.dgecounts.rds	1.29879	control1	control	7	0	0	Distal tubular cells_1
CTCTAATTCTTGGGTA_1	SeuratProject	22452	2759	GSM3823939_control.s1.dgecounts.rds	3.7814	control1	control	4	4	4	Distal tubular cells_2
CTCTACGAGAGCCTAG_1	SeuratProject	7591	1230	GSM3823939_control.s1.dgecounts.rds	2.55566	control1	control	3	1	1	Proximal tubular cells
CTCTACGAGCTGTCTA_1	SeuratProject	16453	1553	GSM3823939_control.s1.dgecounts.rds	31.982	control1	control	0	3	3	Intercalated cells
CTCTACGCAGTTCCCT_1	SeuratProject	10401	1326	GSM3823939_control.s1.dgecounts.rds	2.9228	control1	control	5	5	5	Epithelial cells
CTCTACGGTCGAAAGC_1	SeuratProject	12055	1674	GSM3823939_control.s1.dgecounts.rds	1.42679	control1	control	3	1	1	Proximal tubular cells
CTCTACGGTTCAGGCC_1	SeuratProject	24113	2882	GSM3823939_control.s1.dgecounts.rds	0.767221	control1	control	3	1	1	Proximal tubular cells
CTCTACGTCCAAATGC_1	SeuratProject	11630	1483	GSM3823939_control.s1.dgecounts.rds	1.31556	control1	control	0	3	3	Intercalated cells
CTCTACGTCTTGCAAG_1	SeuratProject	13139	1770	GSM3823939_control.s1.dgecounts.rds	5.99741	control1	control	0	3	3	Intercalated cells
CTCTGGTCACGGCGTT_1	SeuratProject	16394	2173	GSM3823939_control.s1.dgecounts.rds	3.87947	control1	control	7	0	0	Distal tubular cells_1
CTCTGGTGTGTATGGG_1	SeuratProject	8429	1180	GSM3823939_control.s1.dgecounts.rds	2.01685	control1	control	0	3	3	Intercalated cells
CTCTGGTGTTATCACG_1	SeuratProject	10487	1442	GSM3823939_control.s1.dgecounts.rds	3.17536	control1	control	3	1	1	Proximal tubular cells
CTCTGGTTCGGCCGAT_1	SeuratProject	11262	1498	GSM3823939_control.s1.dgecounts.rds	6.35766	control1	control	12	10	10	B cell
CTCTGGTTCGTGGACC_1	SeuratProject	15759	2128	GSM3823939_control.s1.dgecounts.rds	1.81484	control1	control	7	0	0	Distal tubular cells_1
CTGAAACAGCGATAGC_1	SeuratProject	9291	1397	GSM3823939_control.s1.dgecounts.rds	1.09784	control1	control	7	0	0	Distal tubular cells_1
CTGAAACCATCCGGGT_1	SeuratProject	8789	1305	GSM3823939_control.s1.dgecounts.rds	1.94561	control1	control	3	1	1	Proximal tubular cells
CTGAAACGTCGAGTTT_1	SeuratProject	9314	1314	GSM3823939_control.s1.dgecounts.rds	1.17028	control1	control	3	1	1	Proximal tubular cells
CTGAAACGTGCCTTGG_1	SeuratProject	13637	1834	GSM3823939_control.s1.dgecounts.rds	0.505976	control1	control	3	1	1	Proximal tubular cells
CTGAAACGTTGTGGCC_1	SeuratProject	36745	3718	GSM3823939_control.s1.dgecounts.rds	1.94312	control1	control	10	9	9	podocytes
CTGAAACTCTAACTTC_1	SeuratProject	14658	1591	GSM3823939_control.s1.dgecounts.rds	0.716332	control1	control	7	0	0	Distal tubular cells_1
CTGAAGTAGATAGTCA_1	SeuratProject	20708	2542	GSM3823939_control.s1.dgecounts.rds	1.41491	control1	control	3	1	1	Proximal tubular cells
CTGAAGTCAAGGGTCA_1	SeuratProject	44254	4016	GSM3823939_control.s1.dgecounts.rds	0.653048	control1	control	5	5	5	Epithelial cells
CTGAAGTGTCTTCGTC_1	SeuratProject	8649	1408	GSM3823939_control.s1.dgecounts.rds	1.93086	control1	control	8	6	6	neutrophil
CTGATAGCACGGATAG_1	SeuratProject	11453	1466	GSM3823939_control.s1.dgecounts.rds	0.65485	control1	control	11	7	7	Fibroblasts_1
CTGATAGCATTACGAC_1	SeuratProject	15054	1664	GSM3823939_control.s1.dgecounts.rds	1.40162	control1	control	0	3	3	Intercalated cells
CTGATAGGTCCGAACC_1	SeuratProject	16112	1861	GSM3823939_control.s1.dgecounts.rds	3.41981	control1	control	10	9	9	podocytes
CTGATAGGTTGGTTTG_1	SeuratProject	21091	2440	GSM3823939_control.s1.dgecounts.rds	7.42497	control1	control	7	0	0	Distal tubular cells_1
CTGATAGTCGTGACAT_1	SeuratProject	10519	1485	GSM3823939_control.s1.dgecounts.rds	1.53056	control1	control	7	0	0	Distal tubular cells_1
CTGATAGTCTGTCAAG_1	SeuratProject	14219	1714	GSM3823939_control.s1.dgecounts.rds	1.06899	control1	control	7	0	0	Distal tubular cells_1
CTGATAGTCTTGCAAG_1	SeuratProject	17512	2022	GSM3823939_control.s1.dgecounts.rds	0.913659	control1	control	0	3	3	Intercalated cells
CTGATCCAGCCACCTG_1	SeuratProject	12161	1399	GSM3823939_control.s1.dgecounts.rds	0.888085	control1	control	12	10	10	B cell
CTGATCCAGGCGCTCT_1	SeuratProject	16155	1950	GSM3823939_control.s1.dgecounts.rds	0.693284	control1	control	0	3	3	Intercalated cells
CTGATCCAGTTGCAGG_1	SeuratProject	60810	5073	GSM3823939_control.s1.dgecounts.rds	1.00641	control1	control	10	9	9	podocytes
CTGATCCCAACTGGCC_1	SeuratProject	17070	2004	GSM3823939_control.s1.dgecounts.rds	1.44698	control1	control	10	9	9	podocytes
CTGATCCCAGGTCTCG_1	SeuratProject	17846	2230	GSM3823939_control.s1.dgecounts.rds	1.89959	control1	control	3	1	1	Proximal tubular cells
CTGATCCCATCACAAC_1	SeuratProject	8274	1009	GSM3823939_control.s1.dgecounts.rds	25.0665	control1	control	7	0	0	Distal tubular cells_1
CTGATCCCATCCTAGA_1	SeuratProject	7087	976	GSM3823939_control.s1.dgecounts.rds	5.82757	control1	control	7	0	0	Distal tubular cells_1
CTGATCCCATGAGCGA_1	SeuratProject	16838	1964	GSM3823939_control.s1.dgecounts.rds	2.52999	control1	control	5	5	5	Epithelial cells
CTGATCCGTGATGTCT_1	SeuratProject	9100	1431	GSM3823939_control.s1.dgecounts.rds	1.34066	control1	control	11	7	7	Fibroblasts_1
CTGATCCGTTCCCGAG_1	SeuratProject	14462	1696	GSM3823939_control.s1.dgecounts.rds	5.35196	control1	control	0	3	3	Intercalated cells
CTGATCCGTTGTACAC_1	SeuratProject	9158	1279	GSM3823939_control.s1.dgecounts.rds	2.26032	control1	control	5	5	5	Epithelial cells
CTGATCCTCAACACTG_1	SeuratProject	14027	1560	GSM3823939_control.s1.dgecounts.rds	1.19769	control1	control	0	3	3	Intercalated cells
CTGATCCTCGTTTAGG_1	SeuratProject	17783	2181	GSM3823939_control.s1.dgecounts.rds	0.804139	control1	control	7	0	0	Distal tubular cells_1
CTGATCCTCTAAGCCA_1	SeuratProject	13517	1629	GSM3823939_control.s1.dgecounts.rds	0.939558	control1	control	3	1	1	Proximal tubular cells
CTGCCTAAGGGCTTGA_1	SeuratProject	18249	1852	GSM3823939_control.s1.dgecounts.rds	0.937038	control1	control	12	10	10	B cell
CTGCCTACAAACGCGA_1	SeuratProject	15003	1704	GSM3823939_control.s1.dgecounts.rds	1.07978	control1	control	0	3	3	Intercalated cells
CTGCCTACACCGAAAG_1	SeuratProject	10564	1299	GSM3823939_control.s1.dgecounts.rds	1.68497	control1	control	5	5	5	Epithelial cells
CTGCCTACACGAGAGT_1	SeuratProject	18178	1942	GSM3823939_control.s1.dgecounts.rds	12.0585	control1	control	4	4	4	Distal tubular cells_2
CTGCCTAGTAAGCACG_1	SeuratProject	10212	1548	GSM3823939_control.s1.dgecounts.rds	1.31218	control1	control	3	1	1	Proximal tubular cells
CTGCCTAGTCTAACGT_1	SeuratProject	29624	3168	GSM3823939_control.s1.dgecounts.rds	1.02282	control1	control	3	1	1	Proximal tubular cells
CTGCCTATCCGGCACA_1	SeuratProject	19113	2075	GSM3823939_control.s1.dgecounts.rds	1.70565	control1	control	10	9	9	podocytes
CTGCGGAAGGGAACGG_1	SeuratProject	9545	1485	GSM3823939_control.s1.dgecounts.rds	0.806705	control1	control	7	0	0	Distal tubular cells_1
CTGCGGACAAGAAAGG_1	SeuratProject	27131	3120	GSM3823939_control.s1.dgecounts.rds	3.7964	control1	control	5	5	5	Epithelial cells
CTGCGGACAAGCTGAG_1	SeuratProject	11440	1482	GSM3823939_control.s1.dgecounts.rds	1.89685	control1	control	0	3	3	Intercalated cells
CTGCGGACACGGACAA_1	SeuratProject	7607	1009	GSM3823939_control.s1.dgecounts.rds	5.65269	control1	control	0	3	3	Intercalated cells
CTGCGGACAGATCCAT_1	SeuratProject	13242	1658	GSM3823939_control.s1.dgecounts.rds	3.64749	control1	control	10	9	9	podocytes
CTGCGGACATCTGGTA_1	SeuratProject	17879	2288	GSM3823939_control.s1.dgecounts.rds	0.928464	control1	control	7	0	0	Distal tubular cells_1
CTGCGGAGTACGCTGC_1	SeuratProject	24248	2762	GSM3823939_control.s1.dgecounts.rds	0.67222	control1	control	3	1	1	Proximal tubular cells
CTGCGGAGTATTACCG_1	SeuratProject	7646	1148	GSM3823939_control.s1.dgecounts.rds	3.17813	control1	control	10	9	9	podocytes
CTGCGGAGTGTTCTTT_1	SeuratProject	5778	926	GSM3823939_control.s1.dgecounts.rds	0.81343	control1	control	7	0	0	Distal tubular cells_1
CTGCTGTAGACGCTTT_1	SeuratProject	13684	1683	GSM3823939_control.s1.dgecounts.rds	2.96697	control1	control	5	5	5	Epithelial cells
CTGCTGTAGGACTGGT_1	SeuratProject	7062	1150	GSM3823939_control.s1.dgecounts.rds	4.07816	control1	control	3	1	1	Proximal tubular cells
CTGCTGTAGGTGCTAG_1	SeuratProject	8850	1108	GSM3823939_control.s1.dgecounts.rds	2.41808	control1	control	4	4	4	Distal tubular cells_2
CTGCTGTAGTCCGGTC_1	SeuratProject	8523	1353	GSM3823939_control.s1.dgecounts.rds	3.86014	control1	control	3	1	1	Proximal tubular cells
CTGCTGTGTCATGCAT_1	SeuratProject	8280	1170	GSM3823939_control.s1.dgecounts.rds	1.93237	control1	control	11	7	7	Fibroblasts_1
CTGCTGTGTTCCGGCA_1	SeuratProject	14528	1818	GSM3823939_control.s1.dgecounts.rds	0.853524	control1	control	7	0	0	Distal tubular cells_1
CTGCTGTTCACCATAG_1	SeuratProject	15780	1973	GSM3823939_control.s1.dgecounts.rds	9.88593	control1	control	10	9	9	podocytes
CTGCTGTTCCAGTATG_1	SeuratProject	17111	1864	GSM3823939_control.s1.dgecounts.rds	1.72988	control1	control	12	10	10	B cell
CTGCTGTTCCTATTCA_1	SeuratProject	15863	2128	GSM3823939_control.s1.dgecounts.rds	2.30726	control1	control	7	0	0	Distal tubular cells_1
CTGCTGTTCGCTGATA_1	SeuratProject	8366	1283	GSM3823939_control.s1.dgecounts.rds	4.75735	control1	control	7	0	0	Distal tubular cells_1
CTGCTGTTCGTAGGAG_1	SeuratProject	9340	1279	GSM3823939_control.s1.dgecounts.rds	4.29336	control1	control	0	3	3	Intercalated cells
CTGCTGTTCTTTACAC_1	SeuratProject	74733	5681	GSM3823939_control.s1.dgecounts.rds	6.3961	control1	control	0	3	3	Intercalated cells
CTGGTCTAGCGCCTCA_1	SeuratProject	15935	2145	GSM3823939_control.s1.dgecounts.rds	1.86382	control1	control	7	0	0	Distal tubular cells_1
CTGGTCTCACCGGAAA_1	SeuratProject	17333	2120	GSM3823939_control.s1.dgecounts.rds	0.969249	control1	control	7	0	0	Distal tubular cells_1
CTGGTCTCAGATGAGC_1	SeuratProject	10358	1467	GSM3823939_control.s1.dgecounts.rds	1.7764	control1	control	7	0	0	Distal tubular cells_1
CTGGTCTCAGGCAGTA_1	SeuratProject	16122	2022	GSM3823939_control.s1.dgecounts.rds	1.00484	control1	control	7	0	0	Distal tubular cells_1
CTGGTCTGTAACGACG_1	SeuratProject	19265	2167	GSM3823939_control.s1.dgecounts.rds	1.24059	control1	control	0	3	3	Intercalated cells
CTGGTCTGTAGCGATG_1	SeuratProject	16598	1954	GSM3823939_control.s1.dgecounts.rds	3.35583	control1	control	5	5	5	Epithelial cells
CTGGTCTGTGGTGTAG_1	SeuratProject	13144	1666	GSM3823939_control.s1.dgecounts.rds	4.44309	control1	control	4	4	4	Distal tubular cells_2
CTGGTCTGTGTGCGTC_1	SeuratProject	10081	1531	GSM3823939_control.s1.dgecounts.rds	2.1724	control1	control	11	7	7	Fibroblasts_1
CTGGTCTGTTACGGAG_1	SeuratProject	17319	2310	GSM3823939_control.s1.dgecounts.rds	1.16635	control1	control	6	1	1	Proximal tubular cells
CTGGTCTTCTTGTACT_1	SeuratProject	23895	2862	GSM3823939_control.s1.dgecounts.rds	1.41871	control1	control	7	0	0	Distal tubular cells_1
CTGTGCTAGCCATCGC_1	SeuratProject	7697	1409	GSM3823939_control.s1.dgecounts.rds	2.22164	control1	control	3	1	1	Proximal tubular cells
CTGTGCTCAAAGGCGT_1	SeuratProject	12170	1871	GSM3823939_control.s1.dgecounts.rds	1.6516	control1	control	9	8	8	kidney endothelial cells
CTGTGCTGTATAGGTA_1	SeuratProject	11439	1481	GSM3823939_control.s1.dgecounts.rds	2.84116	control1	control	10	9	9	podocytes
CTGTGCTGTCTAGGTT_1	SeuratProject	36826	3726	GSM3823939_control.s1.dgecounts.rds	0.841797	control1	control	5	5	5	Epithelial cells
CTGTGCTGTGAGTGAC_1	SeuratProject	43559	3858	GSM3823939_control.s1.dgecounts.rds	7.16499	control1	control	4	4	4	Distal tubular cells_2
CTGTGCTTCATATCGG_1	SeuratProject	12677	1625	GSM3823939_control.s1.dgecounts.rds	2.88712	control1	control	0	3	3	Intercalated cells
CTGTGCTTCCGAATGT_1	SeuratProject	22066	2396	GSM3823939_control.s1.dgecounts.rds	1.0378	control1	control	7	0	0	Distal tubular cells_1
CTGTGCTTCCGCGTTT_1	SeuratProject	12546	1671	GSM3823939_control.s1.dgecounts.rds	1.64196	control1	control	0	3	3	Intercalated cells
CTGTGCTTCTTGAGAC_1	SeuratProject	29466	3393	GSM3823939_control.s1.dgecounts.rds	1.12672	control1	control	8	6	6	neutrophil
CTGTTTACACCTTGTC_1	SeuratProject	9501	1613	GSM3823939_control.s1.dgecounts.rds	1.2525	control1	control	0	3	3	Intercalated cells
CTGTTTATCCATGCTC_1	SeuratProject	15589	1773	GSM3823939_control.s1.dgecounts.rds	1.48823	control1	control	10	9	9	podocytes
CTTAACTAGACACGAC_1	SeuratProject	15088	2123	GSM3823939_control.s1.dgecounts.rds	0.74894	control1	control	3	1	1	Proximal tubular cells
CTTAACTAGCGTTGCC_1	SeuratProject	10072	1255	GSM3823939_control.s1.dgecounts.rds	1.38006	control1	control	11	7	7	Fibroblasts_1
CTTAACTAGTACGACG_1	SeuratProject	8826	1457	GSM3823939_control.s1.dgecounts.rds	3.73895	control1	control	3	1	1	Proximal tubular cells
CTTAACTCAAGGTTTC_1	SeuratProject	7480	1038	GSM3823939_control.s1.dgecounts.rds	1.87166	control1	control	0	3	3	Intercalated cells
CTTAACTCAAGTCTAC_1	SeuratProject	5778	950	GSM3823939_control.s1.dgecounts.rds	2.35376	control1	control	7	0	0	Distal tubular cells_1
CTTAACTCAAGTTCTG_1	SeuratProject	7669	1154	GSM3823939_control.s1.dgecounts.rds	1.53866	control1	control	7	0	0	Distal tubular cells_1
CTTAACTCAATGGTCT_1	SeuratProject	10926	1732	GSM3823939_control.s1.dgecounts.rds	1.24474	control1	control	3	1	1	Proximal tubular cells
CTTAACTCAGCTCGAC_1	SeuratProject	24575	2398	GSM3823939_control.s1.dgecounts.rds	11.0437	control1	control	4	4	4	Distal tubular cells_2
CTTAACTCAGTGAGTG_1	SeuratProject	22233	2149	GSM3823939_control.s1.dgecounts.rds	0.593712	control1	control	11	7	7	Fibroblasts_1
CTTAACTCATAGTAAG_1	SeuratProject	17828	2304	GSM3823939_control.s1.dgecounts.rds	1.24523	control1	control	7	0	0	Distal tubular cells_1
CTTAACTGTGAAAGAG_1	SeuratProject	18689	2099	GSM3823939_control.s1.dgecounts.rds	0.845417	control1	control	4	4	4	Distal tubular cells_2
CTTAACTTCACAACGT_1	SeuratProject	14562	1623	GSM3823939_control.s1.dgecounts.rds	1.2979	control1	control	5	5	5	Epithelial cells
CTTACCGAGGATATAC_1	SeuratProject	13323	1695	GSM3823939_control.s1.dgecounts.rds	1.17091	control1	control	0	3	3	Intercalated cells
CTTACCGAGTATGACA_1	SeuratProject	13686	1662	GSM3823939_control.s1.dgecounts.rds	0.445711	control1	control	0	3	3	Intercalated cells
CTTACCGAGTTGCAGG_1	SeuratProject	12650	1538	GSM3823939_control.s1.dgecounts.rds	6.55336	control1	control	5	5	5	Epithelial cells
CTTACCGCACCACGTG_1	SeuratProject	12267	1521	GSM3823939_control.s1.dgecounts.rds	6.75797	control1	control	4	4	4	Distal tubular cells_2
CTTACCGCACGAAATA_1	SeuratProject	21086	2616	GSM3823939_control.s1.dgecounts.rds	0.635493	control1	control	3	1	1	Proximal tubular cells
CTTACCGCAGCCTTGG_1	SeuratProject	16466	2211	GSM3823939_control.s1.dgecounts.rds	3.22483	control1	control	9	8	8	kidney endothelial cells
CTTACCGCATGCCCGA_1	SeuratProject	11798	1400	GSM3823939_control.s1.dgecounts.rds	1.83082	control1	control	5	5	5	Epithelial cells
CTTACCGGTACGACCC_1	SeuratProject	19322	2269	GSM3823939_control.s1.dgecounts.rds	3.70045	control1	control	7	0	0	Distal tubular cells_1
CTTACCGGTAGCTTGT_1	SeuratProject	18750	2321	GSM3823939_control.s1.dgecounts.rds	0.522667	control1	control	0	3	3	Intercalated cells
CTTACCGGTCTAGCGC_1	SeuratProject	8276	1315	GSM3823939_control.s1.dgecounts.rds	3.68536	control1	control	9	8	8	kidney endothelial cells
CTTAGGAAGACTACAA_1	SeuratProject	14728	1787	GSM3823939_control.s1.dgecounts.rds	0.936991	control1	control	3	1	1	Proximal tubular cells
CTTAGGATCTCAAGTG_1	SeuratProject	7009	1077	GSM3823939_control.s1.dgecounts.rds	2.28278	control1	control	12	10	10	B cell
CTTAGGATCTGATTCT_1	SeuratProject	11503	1652	GSM3823939_control.s1.dgecounts.rds	1.74737	control1	control	0	3	3	Intercalated cells
CTTCTCTAGAAGGCCT_1	SeuratProject	29065	3311	GSM3823939_control.s1.dgecounts.rds	1.48288	control1	control	3	1	1	Proximal tubular cells
CTTCTCTAGACCACGA_1	SeuratProject	15057	1937	GSM3823939_control.s1.dgecounts.rds	3.59301	control1	control	5	5	5	Epithelial cells
CTTCTCTAGTGTACCT_1	SeuratProject	16966	2099	GSM3823939_control.s1.dgecounts.rds	1.59731	control1	control	7	0	0	Distal tubular cells_1
CTTCTCTAGTTATCGC_1	SeuratProject	14587	2046	GSM3823939_control.s1.dgecounts.rds	3.55111	control1	control	3	1	1	Proximal tubular cells
CTTCTCTCAACGCACC_1	SeuratProject	11856	1434	GSM3823939_control.s1.dgecounts.rds	3.09548	control1	control	0	3	3	Intercalated cells
CTTCTCTGTAAGTGTA_1	SeuratProject	7046	1093	GSM3823939_control.s1.dgecounts.rds	4.18677	control1	control	9	8	8	kidney endothelial cells
CTTCTCTGTTGCGTTA_1	SeuratProject	8696	1187	GSM3823939_control.s1.dgecounts.rds	5.78427	control1	control	9	8	8	kidney endothelial cells
CTTCTCTTCTGATACG_1	SeuratProject	8994	990	GSM3823939_control.s1.dgecounts.rds	35.4347	control1	control	0	3	3	Intercalated cells
CTTGGCTAGAACTGTA_1	SeuratProject	16724	1954	GSM3823939_control.s1.dgecounts.rds	1.42908	control1	control	5	5	5	Epithelial cells
CTTGGCTAGACGCTTT_1	SeuratProject	14341	1766	GSM3823939_control.s1.dgecounts.rds	3.41678	control1	control	0	3	3	Intercalated cells
CTTGGCTAGGAGCGTT_1	SeuratProject	15936	1939	GSM3823939_control.s1.dgecounts.rds	1.29267	control1	control	0	3	3	Intercalated cells
CTTGGCTAGTACGTTC_1	SeuratProject	7453	1313	GSM3823939_control.s1.dgecounts.rds	2.71032	control1	control	3	1	1	Proximal tubular cells
CTTGGCTCACACATGT_1	SeuratProject	8210	1181	GSM3823939_control.s1.dgecounts.rds	1.8514	control1	control	0	3	3	Intercalated cells
CTTGGCTGTACCAGTT_1	SeuratProject	14509	1744	GSM3823939_control.s1.dgecounts.rds	1.63347	control1	control	0	3	3	Intercalated cells
CTTGGCTGTGGGTCAA_1	SeuratProject	22207	2680	GSM3823939_control.s1.dgecounts.rds	0.819561	control1	control	6	1	1	Proximal tubular cells
CTTGGCTTCAACCAAC_1	SeuratProject	17406	2170	GSM3823939_control.s1.dgecounts.rds	2.99322	control1	control	7	0	0	Distal tubular cells_1
CTTGGCTTCAGTGTTG_1	SeuratProject	19894	2583	GSM3823939_control.s1.dgecounts.rds	2.14135	control1	control	3	1	1	Proximal tubular cells
CTTGGCTTCATGTCCC_1	SeuratProject	8293	1163	GSM3823939_control.s1.dgecounts.rds	2.91812	control1	control	0	3	3	Intercalated cells
CTTTGCGAGATCTGCT_1	SeuratProject	8365	1409	GSM3823939_control.s1.dgecounts.rds	2.00837	control1	control	7	0	0	Distal tubular cells_1
CTTTGCGAGTGGGATC_1	SeuratProject	7822	1239	GSM3823939_control.s1.dgecounts.rds	7.88801	control1	control	9	8	8	kidney endothelial cells
CTTTGCGCAACACCCG_1	SeuratProject	7144	1169	GSM3823939_control.s1.dgecounts.rds	1.14782	control1	control	11	7	7	Fibroblasts_1
CTTTGCGCAGACGCAA_1	SeuratProject	14133	1560	GSM3823939_control.s1.dgecounts.rds	0.842001	control1	control	5	5	5	Epithelial cells
CTTTGCGCATCGGTTA_1	SeuratProject	13602	1959	GSM3823939_control.s1.dgecounts.rds	0.742538	control1	control	7	0	0	Distal tubular cells_1
CTTTGCGGTCCTGCTT_1	SeuratProject	8625	1305	GSM3823939_control.s1.dgecounts.rds	1.76232	control1	control	5	5	5	Epithelial cells
CTTTGCGGTCTGATTG_1	SeuratProject	45844	4309	GSM3823939_control.s1.dgecounts.rds	0.621674	control1	control	11	7	7	Fibroblasts_1
CTTTGCGTCAGCTGGC_1	SeuratProject	14674	1981	GSM3823939_control.s1.dgecounts.rds	1.17896	control1	control	3	1	1	Proximal tubular cells
CTTTGCGTCCGAGCCA_1	SeuratProject	21366	2671	GSM3823939_control.s1.dgecounts.rds	0.683329	control1	control	5	5	5	Epithelial cells
GAAACTCAGCGCTTAT_1	SeuratProject	12554	1663	GSM3823939_control.s1.dgecounts.rds	1.11518	control1	control	5	5	5	Epithelial cells
GAAACTCAGTAGATGT_1	SeuratProject	15412	1740	GSM3823939_control.s1.dgecounts.rds	0.862964	control1	control	7	0	0	Distal tubular cells_1
GAAACTCTCTGCTGTC_1	SeuratProject	11510	1500	GSM3823939_control.s1.dgecounts.rds	1.2424	control1	control	5	5	5	Epithelial cells
GAAATGAAGGCCATAG_1	SeuratProject	11219	1229	GSM3823939_control.s1.dgecounts.rds	1.04287	control1	control	12	10	10	B cell
GAAATGAAGGGTGTGT_1	SeuratProject	6989	1052	GSM3823939_control.s1.dgecounts.rds	0.944341	control1	control	11	7	7	Fibroblasts_1
[truncated: 15,037 more rows]

## Sheet: Table S5
Supplementary Table S5: Results of kidney single cell sequencing analysis from GSE131882.
gene	p_val	avg_log2FC	pct.1	pct.2	p_val_adj	cluster
SLC12A1	0	5.36233	0.933	0.099	0	0
UMOD	0	4.00136	0.78	0.098	0	0
GP2	0	3.29365	0.667	0.023	0	0
RP1	0	2.79722	0.589	0.04	0	0
CLDN16	0	2.12827	0.36	0.013	0	0
TCIM	0	2.03963	0.503	0.101	0	0
SIM2	0	2.03329	0.429	0.02	0	0
ACP3	0	1.92008	0.381	0.023	0	0
LINC01606	0	1.86322	0.501	0.103	0	0
CKB	0	1.64419	0.51	0.193	0	0
CLCN5	0	1.64412	0.7	0.332	0	0
CXCL12	0	1.63908	0.278	0.022	0	0
PCDH9	0	1.62018	0.529	0.148	0	0
PLCB1	0	1.62012	0.411	0.039	0	0
SLC4A7	0	1.59658	0.388	0.079	0	0
ERBB4	0	1.52756	0.557	0.205	0	0
ENOX1	0	1.50318	0.216	0.008	0	0
EGF	0	1.49336	0.64	0.223	0	0
TFAP2B	0	1.43767	0.358	0.071	0	0
CASR	0	1.40974	0.314	0.049	0	0
SLC16A12	0	1.39604	0.529	0.168	0	0
PDE1A	0	1.39334	0.511	0.169	0	0
AC087045.3	0	1.39084	0.311	0.042	0	0
F11	0	1.33344	0.356	0.097	0	0
ATP1A1	0	1.31206	0.846	0.539	0	0
SGIP1	0	1.30192	0.45	0.12	0	0
MTURN	0	1.27727	0.498	0.187	0	0
TMEM207	0	1.26022	0.161	0.005	0	0
RANBP3L	0	1.18868	0.344	0.08	0	0
NRK	0	1.16422	0.298	0.061	0	0
NTRK2	0	1.11834	0.222	0.019	0	0
KNG1	0	1.09587	0.503	0.18	0	0
AC068631.1	0	1.03686	0.407	0.118	0	0
IRX2	0	1.02838	0.204	0.005	0	0
NPSR1-AS1	0	0.886259	0.187	0.021	0	0
NEAT1	0	-1.05107	0.971	0.992	0	0
UGT8	1.3668e-306	1.20926	0.366	0.104	4.19621e-302	0
ESRRB	4.30683e-300	0.940523	0.226	0.037	1.32224e-295	0
AC010442.1	1.30669e-297	0.920303	0.275	0.059	4.01167e-293	0
USP53	3.27798e-297	1.24492	0.665	0.365	1.00637e-292	0
LINC01762	8.23925e-297	1.02626	0.31	0.075	2.52953e-292	0
MGLL	1.74604e-293	1.41541	0.344	0.096	5.36051e-289	0
HIP1	3.33997e-287	1.101	0.355	0.102	1.02541e-282	0
PIK3C2G	2.59159e-286	-2.32505	0.034	0.371	7.95643e-282	0
DUSP9	1.14744e-273	1.07077	0.235	0.045	3.52274e-269	0
WNK4	4.09605e-272	1.05719	0.415	0.141	1.25753e-267	0
SEMA6D	6.02563e-271	1.21418	0.384	0.125	1.84993e-266	0
PRKX	7.39468e-266	1.0723	0.268	0.062	2.27024e-261	0
ATP1B1	1.34179e-264	0.962057	0.852	0.629	4.11944e-260	0
DNASE1	2.1767e-262	1.2517	0.518	0.229	6.68269e-258	0
AC058822.1	5.73446e-255	0.962084	0.255	0.059	1.76054e-250	0
ADGRV1	2.20654e-250	0.981101	0.254	0.059	6.77431e-246	0
RHBG	1.1795e-241	-2.08809	0.028	0.325	3.62119e-237	0
TMEM72	2.9386e-239	1.10622	0.466	0.192	9.02179e-235	0
TRPM3	3.44842e-239	-1.69568	0.06	0.363	1.0587e-234	0
CREB3L2	3.83155e-236	1.15682	0.324	0.102	1.17632e-231	0
EFHD1	2.43659e-235	1.06481	0.333	0.108	7.48058e-231	0
FAM184A	8.64914e-235	0.969939	0.291	0.082	2.65537e-230	0
EHF	1.69383e-233	0.810715	0.213	0.043	5.20024e-229	0
FXYD2	1.55187e-230	0.93642	0.789	0.525	4.7644e-226	0
NAV2	6.87722e-218	1.43788	0.495	0.24	2.11138e-213	0
CGNL1	2.55752e-214	1.0749	0.667	0.41	7.85186e-210	0
PKP4	1.89864e-210	1.07105	0.613	0.351	5.82903e-206	0
MST1L	9.63767e-210	1.12143	0.59	0.327	2.95886e-205	0
LRP2	1.38336e-209	-2.51245	0.054	0.324	4.24706e-205	0
KCNJ15	1.5847e-206	-2.01965	0.04	0.305	4.86517e-202	0
LINC02432	7.12035e-206	0.976888	0.132	0.017	2.18602e-201	0
ACSM2A	3.68723e-202	-3.16215	0.078	0.339	1.13202e-197	0
RBFOX1	5.23025e-202	0.77288	0.164	0.029	1.60574e-197	0
ACSM2B	1.00682e-201	-3.03399	0.06	0.319	3.09105e-197	0
LINC01320	6.65406e-201	0.935242	0.491	0.227	2.04286e-196	0
CACNA2D3	9.3364e-200	0.636234	0.158	0.027	2.86637e-195	0
MFSD4A	1.69525e-199	0.916432	0.245	0.067	5.20459e-195	0
INPP4B	8.88726e-195	0.879493	0.275	0.084	2.72848e-190	0
CCSER1	1.32231e-194	1.00643	0.506	0.244	4.05963e-190	0
KLHL13	1.61362e-194	0.934454	0.27	0.083	4.95399e-190	0
MRPS6	2.76353e-192	1.36798	0.718	0.499	8.48431e-188	0
ZDHHC8P1	2.51428e-186	0.645435	0.112	0.012	7.71908e-182	0
ARHGEF38	1.34976e-183	0.970712	0.389	0.164	4.14388e-179	0
PRR15L	4.81097e-180	0.671172	0.123	0.017	1.47702e-175	0
FKBP5	7.71627e-180	0.970264	0.448	0.21	2.36897e-175	0
DNAJC19	3.54417e-179	0.982162	0.276	0.093	1.0881e-174	0
CCDC148	5.1331e-177	0.842741	0.295	0.103	1.57591e-172	0
GPR132	8.72638e-175	0.828089	0.235	0.068	2.67909e-170	0
RHOBTB3	5.5138e-174	1.07577	0.629	0.398	1.69279e-169	0
AC092078.2	1.97163e-172	0.463201	0.103	0.011	6.05311e-168	0
PRDM16-DT	5.10013e-171	1.17151	0.448	0.216	1.56579e-166	0
AGPAT4	1.87938e-170	0.856287	0.19	0.047	5.76987e-166	0
CUBN	3.3169e-170	-2.45733	0.069	0.304	1.01832e-165	0
CLCNKB	9.82303e-168	0.671679	0.703	0.41	3.01577e-163	0
RAP2C	1.67269e-166	0.841161	0.345	0.143	5.13531e-162	0
PAPPA2	3.86033e-166	1.62888	0.139	0.026	1.18516e-161	0
SLC5A12	2.64715e-165	-2.82035	0.047	0.27	8.12702e-161	0
NUDT4	4.77905e-165	0.858376	0.366	0.157	1.46722e-160	0
UGT1A8	4.97528e-164	-2.07095	0.03	0.25	1.52746e-159	0
SLC6A13	1.48653e-163	-2.2887	0.058	0.287	4.56381e-159	0
DEPTOR	2.7158e-162	0.677218	0.204	0.056	8.33778e-158	0
IFIT5	1.85959e-161	0.867855	0.314	0.12	5.70912e-157	0
PRODH2	4.02708e-161	-2.71443	0.047	0.269	1.23635e-156	0
FTCD	4.49116e-160	-2.65074	0.083	0.315	1.37883e-155	0
MIR503HG	1.06899e-158	0.90811	0.295	0.11	3.28189e-154	0
TBX2	1.61979e-155	-1.3608	0.018	0.226	4.97292e-151	0
LRMDA	3.57781e-155	-1.02776	0.069	0.303	1.09842e-150	0
CYFIP2	1.87917e-154	0.951827	0.559	0.331	5.76923e-150	0
PAH	3.53449e-153	-2.26549	0.038	0.248	1.08513e-148	0
PANK1	3.18752e-152	0.829277	0.245	0.083	9.78602e-148	0
PLCG2	1.54669e-148	-1.55703	0.043	0.255	4.74848e-144	0
ARRDC3	1.0677e-147	0.778542	0.363	0.162	3.27795e-143	0
SLC8A1	1.13496e-147	-2.49171	0.058	0.272	3.48445e-143	0
IFITM10	2.83065e-147	1.10149	0.192	0.055	8.69039e-143	0
CLCNKA	2.11526e-146	0.854449	0.636	0.392	6.49407e-142	0
USP2	4.05764e-146	0.902407	0.347	0.152	1.24574e-141	0
AL713999.1	1.75338e-144	0.786264	0.414	0.201	5.38305e-140	0
FYB2	7.85842e-144	-1.22695	0.024	0.223	2.41261e-139	0
ITGB6	1.00118e-142	0.876304	0.277	0.105	3.07372e-138	0
GPC5	2.10029e-142	0.7078	0.188	0.054	6.4481e-138	0
CLDN10-AS1	5.4351e-142	0.67156	0.127	0.025	1.66863e-137	0
FAM110C	2.68434e-141	0.808392	0.203	0.062	8.24118e-137	0
HSPA2	4.5045e-141	0.602397	0.12	0.022	1.38293e-136	0
GLS	9.35636e-140	-0.909965	0.396	0.614	2.8725e-135	0
CA4	9.40529e-140	0.587851	0.115	0.02	2.88752e-135	0
SLC17A1	2.65485e-139	-1.61043	0.02	0.209	8.15065e-135	0
MIOX	4.81428e-139	-2.65449	0.076	0.282	1.47803e-134	0
ABLIM1	1.57971e-137	0.787648	0.581	0.362	4.84985e-133	0
TMEM101	3.06566e-137	-1.90357	0.04	0.235	9.41188e-133	0
PTBP3	6.17813e-137	-1.07034	0.175	0.407	1.89675e-132	0
OSBPL3	1.85568e-136	0.758292	0.486	0.261	5.69714e-132	0
RADX	8.37945e-135	0.515774	0.121	0.024	2.57258e-130	0
ASPA	4.3361e-133	-1.08606	0.02	0.204	1.33123e-128	0
NR2F2-AS1	1.81459e-132	0.727605	0.462	0.248	5.57098e-128	0
TMEM171	8.40916e-132	0.409448	0.116	0.022	2.5817e-127	0
HOXB3	1.12191e-131	0.672627	0.7	0.467	3.44438e-127	0
RASSF4	3.35779e-130	-1.58226	0.106	0.315	1.03088e-125	0
SLC13A3	4.15564e-130	-2.11516	0.022	0.201	1.27582e-125	0
AC083843.3	4.78625e-130	0.839227	0.493	0.288	1.46943e-125	0
HS6ST2	6.70053e-130	0.471216	0.101	0.016	2.05713e-125	0
CPM	8.54093e-129	0.88111	0.407	0.209	2.62215e-124	0
SLC22A6	1.21389e-128	-2.14591	0.028	0.21	3.72676e-124	0
MME	1.24291e-127	-1.57913	0.056	0.245	3.81586e-123	0
KCTD1	1.88735e-127	0.824201	0.292	0.123	5.79435e-123	0
PDE4D	7.05897e-127	-1.09859	0.419	0.616	2.16718e-122	0
DZIP1	2.99667e-126	0.785107	0.272	0.11	9.20007e-122	0
CYP3A5	1.16884e-125	-2.25428	0.077	0.272	3.58846e-121	0
SLC36A2	4.33004e-125	-1.61005	0.012	0.182	1.32936e-120	0
USP13	4.07946e-124	0.500447	0.129	0.029	1.25243e-119	0
GNAI1	1.33195e-122	0.753969	0.158	0.044	4.08921e-118	0
APCDD1L-DT	1.052e-121	-1.58129	0.012	0.178	3.22974e-117	0
EPS8	4.43541e-121	-1.10288	0.057	0.246	1.36171e-116	0
LHX1	1.54484e-119	-0.965156	0.023	0.196	4.74281e-115	0
SAMD5	7.5067e-119	-0.801766	0.02	0.189	2.30463e-114	0
SUSD4	4.79767e-118	0.679874	0.138	0.035	1.47293e-113	0
TBC1D4	2.17358e-117	0.674832	0.404	0.209	6.67312e-113	0
DPEP1	2.58423e-117	-1.44421	0.019	0.184	7.93384e-113	0
PDZK1IP1	8.8246e-117	-1.52663	0.021	0.188	2.70924e-112	0
GLYAT	9.49636e-117	-1.25517	0.019	0.183	2.91548e-112	0
ACOT11	2.10959e-116	0.790188	0.477	0.279	6.47665e-112	0
EMX1	3.11583e-116	-1.09943	0.016	0.179	9.56591e-112	0
GSAP	7.39333e-116	0.745162	0.32	0.15	2.26983e-111	0
SCNN1A	9.07189e-116	0.735332	0.546	0.339	2.78516e-111	0
PTPRD	1.62847e-115	-1.03918	0.015	0.176	4.99956e-111	0
ARFGEF3	4.02787e-115	0.505928	0.112	0.024	1.2366e-110	0
AL137782.1	4.53898e-115	0.879957	0.42	0.236	1.39351e-110	0
GPX3	5.19697e-115	-1.94909	0.125	0.315	1.59552e-110	0
GATA3	1.63949e-114	-1.14286	0.024	0.19	5.03339e-110	0
SULT1C2	2.51213e-114	0.61748	0.808	0.652	7.7125e-110	0
ALDOB	6.31262e-114	-1.67392	0.04	0.21	1.93804e-109	0
GUCY1A1	1.15833e-113	0.464622	0.104	0.021	3.55619e-109	0
NDRG1	1.24848e-112	-1.05807	0.207	0.418	3.83297e-108	0
ANPEP	1.76344e-112	-1.42987	0.021	0.184	5.41394e-108	0
AFM	2.4118e-112	-1.76888	0.031	0.197	7.40447e-108	0
MEF2C	1.04092e-111	0.428954	0.208	0.074	3.19573e-107	0
KCNIP4	1.57294e-110	0.769105	0.325	0.157	4.82908e-106	0
CYP4A11	1.70335e-110	-1.38914	0.014	0.167	5.22946e-106	0
MAF	5.08351e-110	-1.02455	0.029	0.193	1.56069e-105	0
SLC8A1-AS1	9.30808e-110	-1.40054	0.019	0.175	2.85767e-105	0
PRKD1	4.24733e-109	0.690488	0.223	0.086	1.30397e-104	0
SLC34A1	2.42263e-108	-1.61389	0.017	0.17	7.43772e-104	0
WDFY2	6.59617e-108	0.796142	0.418	0.235	2.02509e-103	0
ENPEP	5.39522e-107	-1.0616	0.027	0.185	1.65639e-102	0
SLC16A9	5.91855e-107	-1.43348	0.052	0.219	1.81705e-102	0
PANTR1	1.5628e-106	0.385324	0.156	0.047	4.79795e-102	0
PRODH	3.52767e-106	0.614345	0.146	0.042	1.08303e-101	0
MYO1B	5.56873e-106	-1.18776	0.085	0.267	1.70966e-101	0
OBSL1	2.42519e-105	0.742637	0.314	0.15	7.44558e-101	0
PLEKHH2	2.9421e-105	0.713844	0.388	0.207	9.03253e-101	0
STK32B	4.90259e-105	0.617149	0.146	0.043	1.50514e-100	0
NAAA	3.57118e-104	0.632443	0.157	0.049	1.09639e-99	0
AK3	4.94628e-103	0.730603	0.467	0.281	1.51856e-98	0
COL8A1	5.8641e-103	0.698203	0.139	0.04	1.80034e-98	0
RAP1GAP	1.1016e-102	0.916781	0.334	0.17	3.38202e-98	0
FGF14	1.42871e-102	0.460284	0.105	0.023	4.38629e-98	0
ACSS1	2.95709e-102	0.823192	0.317	0.159	9.07856e-98	0
FGF9	3.06333e-102	0.638769	0.283	0.13	9.40473e-98	0
BICDL1	6.91061e-102	0.860241	0.352	0.186	2.12163e-97	0
ITPRID2	1.23812e-101	0.897281	0.357	0.192	3.80114e-97	0
SFRP1	1.68668e-101	0.613128	0.139	0.04	5.17829e-97	0
CFAP70	2.97334e-101	0.728688	0.46	0.275	9.12845e-97	0
CALD1	4.26768e-101	-1.41422	0.057	0.223	1.31022e-96	0
SYTL4	1.53093e-100	0.500209	0.115	0.028	4.70012e-96	0
SLC16A7	2.29435e-100	0.800613	0.37	0.199	7.04388e-96	0
CSRP2	4.32699e-100	0.539017	0.123	0.033	1.32843e-95	0
UCHL1	1.54778e-99	0.605011	0.114	0.028	4.75183e-95	0
SEC14L1	1.11702e-98	0.75659	0.375	0.208	3.42937e-94	0
SLC16A5	1.29425e-98	0.755672	0.221	0.09	3.97347e-94	0
COL4A3	3.18794e-98	0.471	0.576	0.364	9.78731e-94	0
DUSP1	3.76768e-98	-1.24415	0.228	0.416	1.15672e-93	0
RRAGD	5.33013e-98	0.544605	0.154	0.049	1.6364e-93	0
WEE1	5.33474e-98	0.600145	0.214	0.085	1.63782e-93	0
CLNK	6.49185e-98	-1.56833	0.01	0.146	1.99306e-93	0
RIMBP2	2.59514e-97	0.662966	0.19	0.071	7.96735e-93	0
TRPM6	1.25596e-96	-1.475	0.013	0.15	3.85593e-92	0
AP004608.1	1.5577e-96	-0.974951	0.014	0.153	4.78231e-92	0
LRRC37A4P	2.36005e-96	0.795758	0.371	0.204	7.24558e-92	0
MST1P2	2.89152e-96	0.519323	0.401	0.223	8.87727e-92	0
AGXT2	3.11294e-96	-1.09253	0.013	0.15	9.55704e-92	0
LINC01187	1.25884e-95	-2.53983	0.016	0.152	3.86476e-91	0
SLC12A3	1.34311e-95	-3.40258	0.084	0.242	4.12349e-91	0
TMPRSS4	2.17488e-95	0.876846	0.104	0.025	6.67709e-91	0
LINC02381	2.21573e-95	0.557186	0.113	0.028	6.80253e-91	0
SLC22A8	2.59617e-95	-1.30433	0.009	0.142	7.97051e-91	0
SLC17A3	6.28392e-95	-1.07738	0.007	0.138	1.92923e-90	0
TRPV4	1.84758e-94	-0.86166	0.021	0.163	5.67225e-90	0
ACSF2	3.78166e-94	-1.40662	0.062	0.22	1.16101e-89	0
COL28A1	3.89206e-94	0.482876	0.168	0.058	1.1949e-89	0
TNFRSF14	6.17256e-93	-0.98878	0.067	0.23	1.89504e-88	0
UPB1	8.69707e-93	-1.23248	0.009	0.139	2.67009e-88	0
CALCR	9.02542e-93	0.537638	0.153	0.05	2.77089e-88	0
CLDN10	1.01318e-92	0.712004	0.14	0.044	3.11055e-88	0
SLC22A11	2.99938e-92	-1.32664	0.018	0.153	9.20839e-88	0
SSR3	4.22056e-92	0.774377	0.275	0.133	1.29576e-87	0
GABPB1-AS1	6.21355e-92	0.628264	0.581	0.394	1.90762e-87	0
ZFAND5	6.52954e-92	0.68854	0.583	0.414	2.00463e-87	0
KLHL3	3.83912e-91	-1.19893	0.083	0.244	1.17865e-86	0
IVNS1ABP	4.32994e-91	0.40295	0.691	0.485	1.32934e-86	0
GAD1	4.38723e-91	0.636111	0.219	0.091	1.34692e-86	0
PDE4DIP	7.39371e-91	0.53	0.431	0.255	2.26994e-86	0
SLC47A2	2.06155e-90	-1.19027	0.012	0.142	6.32915e-86	0
ETNK1	5.79869e-90	0.740855	0.453	0.286	1.78026e-85	0
AP000757.2	9.08833e-90	0.399364	0.187	0.072	2.79021e-85	0
PPM1K	2.49641e-89	0.837133	0.338	0.185	7.66422e-85	0
BTG2	4.24414e-89	-1.4227	0.097	0.261	1.30299e-84	0
PDK4	1.44996e-88	0.912462	0.556	0.382	4.45152e-84	0
LINC01507	3.2729e-88	0.619835	0.197	0.08	1.00481e-83	0
SLC25A33	7.83233e-88	0.698928	0.184	0.072	2.4046e-83	0
PDZK1	2.84997e-87	-1.06635	0.062	0.213	8.74969e-83	0
MPC1	5.44219e-87	0.553006	0.433	0.262	1.67081e-82	0
KCNJ1	5.72165e-87	0.594597	0.275	0.131	1.7566e-82	0
ADGRF5	2.89464e-86	-2.30612	0.048	0.188	8.88683e-82	0
RHOBTB1	5.47542e-86	-0.959561	0.024	0.157	1.68101e-81	0
LMO7	1.82603e-85	0.692598	0.457	0.296	5.60611e-81	0
SLC6A19	2.22832e-85	-1.24656	0.009	0.131	6.84116e-81	0
LINC01159	2.23153e-85	0.551429	0.133	0.042	6.85101e-81	0
MYO9A	5.27476e-85	0.656232	0.599	0.438	1.6194e-80	0
ESRRG	6.05495e-85	0.63991	0.577	0.399	1.85893e-80	0
TPTEP1	1.68115e-84	0.566345	0.227	0.1	5.1613e-80	0
SLC25A4	1.73898e-84	0.552796	0.189	0.076	5.33884e-80	0
BDKRB2	1.83089e-84	0.620261	0.164	0.06	5.621e-80	0
CPEB3	3.1122e-84	0.656422	0.245	0.115	9.55475e-80	0
KCNC3	3.40655e-84	-0.777375	0.039	0.179	1.04584e-79	0
CFAP221	4.05921e-84	0.619049	0.241	0.112	1.24622e-79	0
CNTNAP3B	4.17862e-84	-0.628558	0.039	0.178	1.28288e-79	0
ITGAV	8.27701e-84	-1.01139	0.191	0.363	2.54113e-79	0
AC083843.4	9.29249e-84	0.527996	0.183	0.073	2.85289e-79	0
FXR1	2.60461e-83	0.758868	0.473	0.322	7.9964e-79	0
SCNN1G	2.98652e-83	-1.32297	0.011	0.132	9.16892e-79	0
BHMT2	4.54671e-83	-1.05873	0.186	0.355	1.39588e-78	0
AC015910.1	6.27129e-83	-1.68542	0.01	0.128	1.92535e-78	0
SLC4A4	7.73533e-83	-1.03183	0.046	0.185	2.37482e-78	0
FAM13A	9.01073e-83	0.738253	0.352	0.202	2.76638e-78	0
CIT	1.59163e-82	0.695815	0.221	0.098	4.88646e-78	0
STARD8	2.27417e-82	0.479387	0.14	0.047	6.98194e-78	0
CHL1	2.7173e-82	0.592094	0.244	0.114	8.34237e-78	0
S100A2	3.24373e-82	0.987451	0.18	0.071	9.95859e-78	0
IFIT1	4.66048e-82	0.617194	0.194	0.08	1.43081e-77	0
FRMD1	2.35477e-81	-1.1379	0.009	0.126	7.22937e-77	0
TLE1	2.45812e-81	0.47735	0.167	0.063	7.54666e-77	0
IL18	2.48269e-81	-1.11171	0.026	0.153	7.6221e-77	0
DPYS	2.42272e-80	-0.854948	0.009	0.124	7.43801e-76	0
FUT6	3.04673e-80	-0.861613	0.013	0.13	9.35377e-76	0
XPA	5.63103e-80	0.779729	0.324	0.181	1.72878e-75	0
PDE1C	6.02766e-80	-0.816183	0.008	0.122	1.85055e-75	0
LPIN1	7.67067e-80	0.691002	0.312	0.169	2.35497e-75	0
PHACTR1	1.06654e-79	0.666735	0.208	0.091	3.27438e-75	0
FBXL4	1.10177e-78	0.58268	0.298	0.157	3.38254e-74	0
HSPA1B	1.45889e-78	-1.38481	0.098	0.247	4.47893e-74	0
ASS1	2.00953e-78	-1.04111	0.032	0.159	6.16945e-74	0
PTPN4	4.0939e-78	0.8393	0.374	0.226	1.25687e-73	0
MECOM	5.09612e-78	0.508815	0.637	0.45	1.56456e-73	0
CYP4F3	6.78354e-78	-0.894644	0.017	0.135	2.08262e-73	0
TRMT9B	1.41561e-77	0.635184	0.325	0.18	4.34606e-73	0
NPY1R	1.67063e-77	0.488824	0.117	0.036	5.12902e-73	0
RHCG	3.85793e-77	-0.991202	0.023	0.145	1.18442e-72	0
GRAMD1B	1.04658e-76	-0.782954	0.022	0.142	3.21311e-72	0
SLC39A5	1.08755e-76	-0.956953	0.012	0.125	3.3389e-72	0
ARHGAP24	1.1546e-76	0.635865	0.484	0.322	3.54475e-72	0
MERTK	1.19667e-76	0.590071	0.194	0.083	3.67389e-72	0
PIEZO1	1.21616e-76	-0.836693	0.036	0.164	3.73373e-72	0
GDA	1.43721e-76	-0.924801	0.008	0.117	4.41237e-72	0
MGME1	2.13261e-76	0.625727	0.245	0.119	6.54731e-72	0
AC027031.2	3.57963e-76	0.528138	0.169	0.067	1.09898e-71	0
L3MBTL4	5.85701e-76	-0.620909	0.034	0.16	1.79816e-71	0
IQGAP2	1.06073e-75	-0.709759	0.021	0.14	3.25656e-71	0
KCNAB1	5.77226e-75	0.434649	0.125	0.042	1.77214e-70	0
AMN	6.59608e-75	-1.16381	0.028	0.15	2.02506e-70	0
AHCYL1	3.25031e-74	0.64986	0.387	0.241	9.97877e-70	0
ATP6V1C2	4.07419e-74	-1.37205	0.02	0.133	1.25082e-69	0
C9	4.52168e-74	-0.861302	0.121	0.272	1.3882e-69	0
PWRN1	5.56075e-74	-0.993844	0.01	0.118	1.70721e-69	0
PLG	5.6591e-74	-0.829615	0.01	0.118	1.7374e-69	0
SH3BP2	1.39176e-73	-0.833393	0.039	0.166	4.27285e-69	0
PRKCQ	2.76068e-73	0.586156	0.1	0.028	8.47555e-69	0
AP1S3	7.88189e-73	0.398165	0.103	0.03	2.41982e-68	0
CD200	1.6274e-72	-0.610152	0.01	0.116	4.99629e-68	0
ABCC4	3.24313e-72	-0.726051	0.031	0.151	9.95674e-68	0
HOXC4	3.62828e-72	0.411752	0.124	0.042	1.11392e-67	0
BX571818.1	4.50225e-72	-1.72399	0.029	0.146	1.38224e-67	0
P3H2	1.16689e-71	0.749072	0.349	0.21	3.58247e-67	0
CASK	1.28188e-71	0.56646	0.279	0.15	3.9355e-67	0
PDZD2	1.94745e-71	-0.910146	0.047	0.172	5.97888e-67	0
GRB10	2.00098e-71	-0.80591	0.037	0.16	6.1432e-67	0
TTC14	2.42955e-71	0.519321	0.619	0.464	7.45897e-67	0
STXBP4	2.78032e-71	0.680955	0.311	0.177	8.53585e-67	0
HIBADH	3.24378e-71	0.661217	0.25	0.129	9.95874e-67	0
CDHR5	3.31477e-71	-1.04642	0.018	0.128	1.01767e-66	0
LAMA1	5.42612e-71	0.617465	0.161	0.064	1.66587e-66	0
CTBS	5.76846e-71	0.345783	0.138	0.051	1.77097e-66	0
DSCAML1	5.99125e-71	0.51263	0.219	0.103	1.83937e-66	0
SLC15A2	1.1003e-70	0.59433	0.198	0.089	3.37804e-66	0
AC131392.1	1.14145e-70	0.40822	0.272	0.142	3.50438e-66	0
SLC13A1	1.44543e-70	-0.738664	0.008	0.11	4.43762e-66	0
BHMT	1.49959e-70	-1.0403	0.036	0.154	4.60389e-66	0
SRSF10	1.68224e-70	0.539389	0.649	0.499	5.16463e-66	0
NAIP	1.87572e-70	0.54851	0.321	0.183	5.75865e-66	0
PPFIBP1	1.95988e-70	-0.842119	0.228	0.39	6.01704e-66	0
ADM	5.64907e-70	-1.16904	0.027	0.14	1.73432e-65	0
TOX3	4.37921e-69	-0.653631	0.042	0.163	1.34446e-64	0
MYOF	5.58139e-69	0.516069	0.228	0.111	1.71354e-64	0
STK33	1.76966e-68	-0.633281	0.067	0.201	5.43302e-64	0
PGAP6	2.19057e-68	0.588254	0.198	0.091	6.72527e-64	0
KRT19	2.39229e-68	-1.50326	0.021	0.128	7.34456e-64	0
LCN12	4.22667e-68	0.561234	0.184	0.081	1.29763e-63	0
SLC28A1	6.56052e-68	-0.658824	0.008	0.106	2.01415e-63	0
STK39	6.95276e-68	0.489224	0.196	0.09	2.13457e-63	0
TFCP2L1	8.4345e-68	0.460486	0.705	0.567	2.58947e-63	0
PCCA-DT	8.84735e-68	0.795193	0.166	0.07	2.71623e-63	0
RETREG1	2.10618e-67	-0.81758	0.051	0.175	6.4662e-63	0
FAT1	2.38256e-67	-0.73553	0.155	0.308	7.3147e-63	0
SH3D21	3.17434e-67	0.608888	0.15	0.059	9.74553e-63	0
HSPA1A	9.18995e-67	-1.14903	0.059	0.182	2.82141e-62	0
TMEM161B-AS1	1.29271e-66	0.579381	0.419	0.271	3.96875e-62	0
PPARGC1A	2.1941e-66	0.447635	0.636	0.481	6.7361e-62	0
FECH	6.5639e-66	0.393048	0.112	0.038	2.01518e-61	0
FAM20C	7.84834e-66	-0.837409	0.021	0.127	2.40952e-61	0
ABHD14A-ACY1	8.74261e-66	-1.10966	0.07	0.197	2.68407e-61	0
[truncated: 21,327 more rows]

## Sheet: Table S6
Supplementary Table S6: The genes were obtained by three methods are based on machine-learning, respectively
[truncated: 38 more rows]
